# Supplementary material for: chromMAGMA: regulatory element-centric interrogation of risk variants
Source: Life Sci Alliance. 2022 Jul 1;5(10):e202201446. doi: 10.26508/lsa.202201446 (PMC9251535; doi:10.26508/lsa.202201446)
Supplement: Supplementary file 1 [file LSA-2022-01446_TableS1.xlsx]

## Sheet: ST1
GWAS	Ensembl Gene ID	Gene	RE Coorindates (hg19)	P-value	Significant
CCOC	ENSG00000108753	HNF1B	17:36098905-36099952	1.45e-08	1
CCOC	ENSG00000132142	ACACA	17:36100871-36107816	1.58e-08	1
CCOC	ENSG00000141141	DDX52	17:36100871-36107816	1.58e-08	1
CCOC	ENSG00000115008	IL1A	2:113539251-113543170	7.27e-06	0
CCOC	ENSG00000125538	IL1B	2:113539251-113543170	7.27e-06	0
CCOC	ENSG00000125571	IL37	2:113539251-113543170	7.27e-06	0
CCOC	ENSG00000125611	CHCHD5	2:113539251-113543170	7.27e-06	0
CCOC	ENSG00000169607	CKAP2L	2:113539251-113543170	7.27e-06	0
CCOC	ENSG00000102804	TSC22D1	13:44874244-44888995	1.63e-05	0
CCOC	ENSG00000133114	GPALPP1	13:44874244-44888995	1.63e-05	0
CCOC	ENSG00000139656	SMIM2	13:44874244-44888995	1.63e-05	0
CCOC	ENSG00000151773	CCDC122	13:44874244-44888995	1.63e-05	0
CCOC	ENSG00000151778	SERP2	13:44874244-44888995	1.63e-05	0
CCOC	ENSG00000179630	LACC1	13:44874244-44888995	1.63e-05	0
CCOC	ENSG00000147099	HDAC8	X:71791650-71793550	2.21e-05	0
CCOC	ENSG00000136682	CBWD2	2:113550152-113554535	3.29e-05	0
CCOC	ENSG00000136688	IL36G	2:113550152-113554535	3.29e-05	0
CCOC	ENSG00000136689	IL1RN	2:113550152-113554535	3.29e-05	0
CCOC	ENSG00000136695	IL36RN	2:113550152-113554535	3.29e-05	0
CCOC	ENSG00000136696	IL36B	2:113550152-113554535	3.29e-05	0
CCOC	ENSG00000153107	ANAPC1	2:113550152-113554535	3.29e-05	0
CCOC	ENSG00000153214	TMEM87B	2:113550152-113554535	3.29e-05	0
CCOC	ENSG00000169629	RGPD8	2:113550152-113554535	3.29e-05	0
CCOC	ENSG00000188177	ZC3H6	2:113550152-113554535	3.29e-05	0
CCOC	ENSG00000095564	BTAF1	10:92921440-92925163	3.32e-05	0
CCOC	ENSG00000107854	TNKS2	10:92921440-92925163	3.32e-05	0
CCOC	ENSG00000165338	HECTD2	10:92921440-92925163	3.32e-05	0
CCOC	ENSG00000180628	PCGF5	10:92921440-92925163	3.32e-05	0
CCOC	ENSG00000170464	DNAJC18	5:138708590-138710125	3.32e-05	0
CCOC	ENSG00000170482	SLC23A1	5:138708590-138710125	3.32e-05	0
CCOC	ENSG00000184584	TMEM173	5:138708590-138710125	3.32e-05	0
CCOC	ENSG00000062282	DGAT2	11:75400410-75402010	4.88e-05	0
CCOC	ENSG00000149257	SERPINH1	11:75400410-75402010	4.88e-05	0
CCOC	ENSG00000166391	MOGAT2	11:75400410-75402010	4.88e-05	0
CCOC	ENSG00000171533	MAP6	11:75400410-75402010	4.88e-05	0
CCOC	ENSG00000198382	UVRAG	11:75400410-75402010	4.88e-05	0
CCOC	ENSG00000107201	DDX58	9:32393506-32396934	5.71e-05	0
CCOC	ENSG00000122729	ACO1	9:32393506-32396934	5.71e-05	0
CCOC	ENSG00000197579	TOPORS	9:32393506-32396934	5.71e-05	0
CCOC	ENSG00000094755	GABRP	5:170209218-170209990	8.26e-05	0
CCOC	ENSG00000181163	NPM1	5:170209218-170209990	8.26e-05	0
CCOC	ENSG00000100100	PIK3IP1	22:32143252-32147248	8.28e-05	0
CCOC	ENSG00000133422	MORC2	22:32143252-32147248	8.28e-05	0
CCOC	ENSG00000183530	PRR14L	22:32143252-32147248	8.28e-05	0
CCOC	ENSG00000184708	EIF4ENIF1	22:32143252-32147248	8.28e-05	0
CCOC	ENSG00000198089	SFI1	22:32143252-32147248	8.28e-05	0
CCOC	ENSG00000241878	PISD	22:32143252-32147248	8.28e-05	0
CCOC	ENSG00000101425	BPI	20:36931802-36933738	9.69e-05	0
CCOC	ENSG00000164161	HHIP	4:145565674-145569955	0.00011229	0
CCOC	ENSG00000170180	GYPA	4:145565674-145569955	0.00011229	0
CCOC	ENSG00000101266	CSNK2A1	20:508849-511328	0.00015421	0
CCOC	ENSG00000125841	NRSN2	20:508849-511328	0.00015421	0
CCOC	ENSG00000125875	TBC1D20	20:508849-511328	0.00015421	0
CCOC	ENSG00000068024	HDAC4	2:240059105-240059412	0.00016413	0
CCOC	ENSG00000064655	EYA2	20:45752440-45757114	0.00018761	0
CCOC	ENSG00000100150	DEPDC5	22:32195478-32196988	0.00018966	0
CCOC	ENSG00000117419	ERI3	1:44820025-44821670	0.00019301	0
CCOC	ENSG00000132773	TOE1	1:44820025-44821670	0.00019301	0
CCOC	ENSG00000142945	KIF2C	1:44820025-44821670	0.00019301	0
CCOC	ENSG00000178028	DMAP1	1:44820025-44821670	0.00019301	0
CCOC	ENSG00000198198	SZT2	1:44820025-44821670	0.00019301	0
CCOC	ENSG00000148702	HABP2	10:115370241-115371453	0.00019503	0
CCOC	ENSG00000165806	CASP7	10:115370241-115371453	0.00019503	0
CCOC	ENSG00000197893	NRAP	10:115370241-115371453	0.00019503	0
CCOC	ENSG00000102934	PLLP	16:57315775-57319113	0.00022151	0
CCOC	ENSG00000102978	POLR2C	16:57315775-57319113	0.00022151	0
CCOC	ENSG00000159579	RSPRY1	16:57315775-57319113	0.00022151	0
CCOC	ENSG00000172775	FAM192A	16:57315775-57319113	0.00022151	0
CCOC	ENSG00000074582	BCS1L	2:219773122-219775517	0.00022602	0
CCOC	ENSG00000115556	PLCD4	2:219773122-219775517	0.00022602	0
CCOC	ENSG00000115568	ZNF142	2:219773122-219775517	0.00022602	0
CCOC	ENSG00000115592	PRKAG3	2:219773122-219775517	0.00022602	0
CCOC	ENSG00000115596	WNT6	2:219773122-219775517	0.00022602	0
CCOC	ENSG00000115657	ABCB6	2:219773122-219775517	0.00022602	0
CCOC	ENSG00000123992	DNPEP	2:219773122-219775517	0.00022602	0
CCOC	ENSG00000124006	OBSL1	2:219773122-219775517	0.00022602	0
CCOC	ENSG00000127837	AAMP	2:219773122-219775517	0.00022602	0
CCOC	ENSG00000135912	TTLL4	2:219773122-219775517	0.00022602	0
CCOC	ENSG00000135913	USP37	2:219773122-219775517	0.00022602	0
CCOC	ENSG00000135925	WNT10A	2:219773122-219775517	0.00022602	0
CCOC	ENSG00000144580	RQCD1	2:219773122-219775517	0.00022602	0
CCOC	ENSG00000144589	STK11IP	2:219773122-219775517	0.00022602	0
CCOC	ENSG00000163481	RNF25	2:219773122-219775517	0.00022602	0
CCOC	ENSG00000163482	STK36	2:219773122-219775517	0.00022602	0
CCOC	ENSG00000163497	FEV	2:219773122-219775517	0.00022602	0
CCOC	ENSG00000163499	CRYBA2	2:219773122-219775517	0.00022602	0
CCOC	ENSG00000163501	IHH	2:219773122-219775517	0.00022602	0
CCOC	ENSG00000163516	ANKZF1	2:219773122-219775517	0.00022602	0
CCOC	ENSG00000163521	GLB1L	2:219773122-219775517	0.00022602	0
CCOC	ENSG00000171450	CDK5R2	2:219773122-219775517	0.00022602	0
CCOC	ENSG00000187736	NHEJ1	2:219773122-219775517	0.00022602	0
CCOC	ENSG00000100105	PATZ1	22:31630587-31632146	0.00024063	0
CCOC	ENSG00000138942	RNF185	22:31630587-31632146	0.00024063	0
CCOC	ENSG00000182541	LIMK2	22:31630587-31632146	0.00024063	0
CCOC	ENSG00000183963	SMTN	22:31630587-31632146	0.00024063	0
CCOC	ENSG00000185133	INPP5J	22:31630587-31632146	0.00024063	0
CCOC	ENSG00000007944	MYLIP	6:16758410-16772273	0.00029691	0
CCOC	ENSG00000124788	ATXN1	6:16758410-16772273	0.00029691	0
CCOC	ENSG00000124789	NUP153	6:16758410-16772273	0.00029691	0
CCOC	ENSG00000075426	FOSL2	2:27957840-27962099	0.00030495	0
CCOC	ENSG00000115226	FNDC4	2:27957840-27962099	0.00030495	0
CCOC	ENSG00000163803	PLB1	2:27957840-27962099	0.00030495	0
CCOC	ENSG00000171174	RBKS	2:27957840-27962099	0.00030495	0
CCOC	ENSG00000243147	MRPL33	2:27957840-27962099	0.00030495	0
CCOC	ENSG00000068383	INPP5A	10:134527393-134528770	0.00031987	0
CCOC	ENSG00000130640	TUBGCP2	10:134527393-134528770	0.00031987	0
CCOC	ENSG00000148826	NKX6-2	10:134527393-134528770	0.00031987	0
CCOC	ENSG00000171798	KNDC1	10:134527393-134528770	0.00031987	0
CCOC	ENSG00000106617	PRKAG2	7:151320532-151321782	0.00034349	0
CCOC	ENSG00000147010	SH3KBP1	X:19904060-19907350	0.00038468	0
CCOC	ENSG00000090686	USP48	1:22281643-22285107	0.0004063	0
CCOC	ENSG00000142794	NBPF3	1:22281643-22285107	0.0004063	0
CCOC	ENSG00000219073	CELA3B	1:22281643-22285107	0.0004063	0
CCOC	ENSG00000100078	PLA2G3	22:31587980-31589515	0.00041136	0
CCOC	ENSG00000124743	KLHL31	6:53491912-53494852	0.00043756	0
CCOC	ENSG00000151067	CACNA1C	12:2428366-2428566	0.00044003	0
CCOC	ENSG00000088035	ALG6	1:63831889-63834271	0.00045059	0
CCOC	ENSG00000142856	ITGB3BP	1:63831889-63834271	0.00045059	0
CCOC	ENSG00000154252	GAL3ST2	2:242709244-242712465	0.0004589	0
CCOC	ENSG00000180902	D2HGDH	2:242709244-242712465	0.0004589	0
CCOC	ENSG00000204099	NEU4	2:242709244-242712465	0.0004589	0
CCOC	ENSG00000115234	SNX17	2:28017806-28024433	0.00050454	0
CCOC	ENSG00000138085	ATRAID	2:28017806-28024433	0.00050454	0
CCOC	ENSG00000071242	RPS6KA2	6:167008092-167013917	0.00051817	0
CCOC	ENSG00000169926	KLF13	15:31625785-31626732	0.0005305	0
CCOC	ENSG00000078401	EDN1	6:12584292-12587697	0.00053949	0
CCOC	ENSG00000112137	PHACTR1	6:12584292-12587697	0.00053949	0
CCOC	ENSG00000117481	NSUN4	1:47778164-47781257	0.00057438	0
CCOC	ENSG00000123473	STIL	1:47778164-47781257	0.00057438	0
CCOC	ENSG00000142961	MOB3C	1:47778164-47781257	0.00057438	0
CCOC	ENSG00000162368	CMPK1	1:47778164-47781257	0.00057438	0
CCOC	ENSG00000186790	FOXE3	1:47778164-47781257	0.00057438	0
CCOC	ENSG00000075643	MOCOS	18:33729802-33734730	0.00057741	0
CCOC	ENSG00000134759	ELP2	18:33729802-33734730	0.00057741	0
CCOC	ENSG00000141424	SLC39A6	18:33729802-33734730	0.00057741	0
CCOC	ENSG00000135443	KRT85	12:52764851-52765887	0.0005793	0
CCOC	ENSG00000170442	KRT86	12:52764851-52765887	0.0005793	0
CCOC	ENSG00000138375	SMARCAL1	2:217203947-217211607	0.0005827	0
CCOC	ENSG00000144583	44259	2:217203947-217211607	0.0005827	0
CCOC	ENSG00000114861	FOXP1	3:71104193-71116957	0.00059932	0
CCOC	ENSG00000100523	DDHD1	14:53593051-53594607	0.00064545	0
CCOC	ENSG00000197930	ERO1L	14:53593051-53594607	0.00064545	0
CCOC	ENSG00000165029	ABCA1	9:107572806-107574122	0.00067461	0
CCOC	ENSG00000085832	EPS15	1:51979628-51987311	0.00067506	0
CCOC	ENSG00000085840	ORC1	1:51979628-51987311	0.00067506	0
CCOC	ENSG00000185104	FAF1	1:51979628-51987311	0.00067506	0
CCOC	ENSG00000198841	KTI12	1:51979628-51987311	0.00067506	0
CCOC	ENSG00000164040	PGRMC2	4:128884954-128887842	0.00068915	0
CCOC	ENSG00000164073	MFSD8	4:128884954-128887842	0.00068915	0
CCOC	ENSG00000108773	KAT2A	17:39893775-39897477	0.00072605	0
CCOC	ENSG00000141756	FKBP10	17:39893775-39897477	0.00072605	0
CCOC	ENSG00000173801	JUP	17:39893775-39897477	0.00072605	0
CCOC	ENSG00000173805	HAP1	17:39893775-39897477	0.00072605	0
CCOC	ENSG00000178502	KLHL11	17:39893775-39897477	0.00072605	0
CCOC	ENSG00000184502	GAST	17:39893775-39897477	0.00072605	0
CCOC	ENSG00000100979	PLTP	20:44484568-44487389	0.00072793	0
CCOC	ENSG00000101473	ACOT8	20:44484568-44487389	0.00072793	0
CCOC	ENSG00000124116	WFDC3	20:44484568-44487389	0.00072793	0
CCOC	ENSG00000124160	NCOA5	20:44484568-44487389	0.00072793	0
CCOC	ENSG00000132801	ZSWIM3	20:44484568-44487389	0.00072793	0
CCOC	ENSG00000149634	SPATA25	20:44484568-44487389	0.00072793	0
CCOC	ENSG00000172315	TP53RK	20:44484568-44487389	0.00072793	0
CCOC	ENSG00000118922	KLF12	13:74687967-74690491	0.00075014	0
CCOC	ENSG00000140848	CPNE2	16:57164260-57165538	0.00078887	0
CCOC	ENSG00000168038	ULK4	3:42111404-42116008	0.00085523	0
CCOC	ENSG00000182606	TRAK1	3:42111404-42116008	0.00085523	0
CCOC	ENSG00000187094	CCK	3:42111404-42116008	0.00085523	0
CCOC	ENSG00000108510	MED13	17:60885540-60885962	0.00086156	0
CCOC	ENSG00000146872	TLK2	17:60885540-60885962	0.00086156	0
CCOC	ENSG00000173838	44265	17:60885540-60885962	0.00086156	0
CCOC	ENSG00000111142	METAP2	12:95396337-95398334	0.00086343	0
CCOC	ENSG00000184752	NDUFA12	12:95396337-95398334	0.00086343	0
CCOC	ENSG00000083828	ZNF586	19:58339933-58342508	0.00086454	0
CCOC	ENSG00000121417	ZNF211	19:58339933-58342508	0.00086454	0
CCOC	ENSG00000198466	ZNF587	19:58339933-58342508	0.00086454	0
CCOC	ENSG00000268750	CTD-2583A14.10	19:58339933-58342508	0.00086454	0
CCOC	ENSG00000269343	ZNF587B	19:58339933-58342508	0.00086454	0
CCOC	ENSG00000111906	HDDC2	6:125683707-125685447	0.00086867	0
CCOC	ENSG00000135547	HEY2	6:125683707-125685447	0.00086867	0
CCOC	ENSG00000110237	ARHGEF17	11:72998206-73001270	0.00087941	0
CCOC	ENSG00000171631	P2RY6	11:72998206-73001270	0.00087941	0
CCOC	ENSG00000186635	ARAP1	11:72998206-73001270	0.00087941	0
CCOC	ENSG00000108424	KPNB1	17:45143563-45145530	0.00089067	0
CCOC	ENSG00000120071	KANSL1	17:45143563-45145530	0.00089067	0
CCOC	ENSG00000141295	SCRN2	17:45143563-45145530	0.00089067	0
CCOC	ENSG00000167182	SP2	17:45143563-45145530	0.00089067	0
CCOC	ENSG00000178852	EFCAB13	17:45143563-45145530	0.00089067	0
CCOC	ENSG00000185829	ARL17A	17:45143563-45145530	0.00089067	0
CCOC	ENSG00000198336	MYL4	17:45143563-45145530	0.00089067	0
CCOC	ENSG00000228696	ARL17B	17:45143563-45145530	0.00089067	0
CCOC	ENSG00000143153	ATP1B1	1:169087253-169087909	0.00090971	0
CCOC	ENSG00000143156	NME7	1:169087253-169087909	0.00090971	0
CCOC	ENSG00000087510	TFAP2C	20:55203480-55203630	0.00094089	0
CCOC	ENSG00000090238	YPEL3	16:30362874-30364410	0.00094323	0
CCOC	ENSG00000169217	CD2BP2	16:30362874-30364410	0.00094323	0
CCOC	ENSG00000070010	UFD1L	22:19927980-19932490	0.00094523	0
CCOC	ENSG00000093010	COMT	22:19927980-19932490	0.00094523	0
CCOC	ENSG00000099889	ARVCF	22:19927980-19932490	0.00094523	0
CCOC	ENSG00000099899	TRMT2A	22:19927980-19932490	0.00094523	0
CCOC	ENSG00000099904	ZDHHC8	22:19927980-19932490	0.00094523	0
CCOC	ENSG00000099917	MED15	22:19927980-19932490	0.00094523	0
CCOC	ENSG00000128191	DGCR8	22:19927980-19932490	0.00094523	0
CCOC	ENSG00000184470	TXNRD2	22:19927980-19932490	0.00094523	0
CCOC	ENSG00000041982	TNC	9:117918831-117920654	0.00098373	0
CCOC	ENSG00000173077	44531	9:117918831-117920654	0.00098373	0
CCOC	ENSG00000174032	SLC25A30	13:45986335-45986735	0.00098437	0
CCOC	ENSG00000156831	NSMCE2	8:126524043-126528513	0.0009876	0
CCOC	ENSG00000173334	TRIB1	8:126524043-126528513	0.0009876	0
CCOC	ENSG00000110203	FOLR3	11:71955540-71955690	0.00099358	0
CCOC	ENSG00000165462	PHOX2A	11:71955540-71955690	0.00099358	0
CCOC	ENSG00000117906	RCN2	15:76627383-76636157	0.0010506	0
CCOC	ENSG00000140374	ETFA	15:76627383-76636157	0.0010506	0
CCOC	ENSG00000140386	SCAPER	15:76627383-76636157	0.0010506	0
CCOC	ENSG00000140398	NEIL1	15:76627383-76636157	0.0010506	0
CCOC	ENSG00000140400	MAN2C1	15:76627383-76636157	0.0010506	0
CCOC	ENSG00000159556	ISL2	15:76627383-76636157	0.0010506	0
CCOC	ENSG00000167196	FBXO22	15:76627383-76636157	0.0010506	0
CCOC	ENSG00000169371	SNUPN	15:76627383-76636157	0.0010506	0
CCOC	ENSG00000169375	SIN3A	15:76627383-76636157	0.0010506	0
CCOC	ENSG00000156299	TIAM1	21:32821984-32823109	0.0010679	0
CCOC	ENSG00000151090	THRB	3:24531240-24538931	0.0010829	0
CCOC	ENSG00000174748	RPL15	3:24531240-24538931	0.0010829	0
CCOC	ENSG00000107077	KDM4C	9:6868920-6869776	0.0010914	0
CCOC	ENSG00000169252	ADRB2	5:148204929-148213058	0.0010976	0
CCOC	ENSG00000079739	PGM1	1:64058078-64060893	0.0011036	0
CCOC	ENSG00000203965	EFCAB7	1:64058078-64060893	0.0011036	0
CCOC	ENSG00000187742	SECISBP2	9:92020065-92026790	0.001105	0
CCOC	ENSG00000187764	SEMA4D	9:92020065-92026790	0.001105	0
CCOC	ENSG00000124120	TTPAL	20:43225473-43231230	0.0011535	0
CCOC	ENSG00000168734	PKIG	20:43225473-43231230	0.0011535	0
CCOC	ENSG00000150477	KIAA1328	18:33707896-33713096	0.0011889	0
CCOC	ENSG00000186812	ZNF397	18:33707896-33713096	0.0011889	0
CCOC	ENSG00000122547	EEPD1	7:36640606-36641036	0.001216	0
CCOC	ENSG00000136250	AOAH	7:36640606-36641036	0.001216	0
CCOC	ENSG00000155849	ELMO1	7:36640606-36641036	0.001216	0
CCOC	ENSG00000116044	NFE2L2	2:178187098-178188286	0.0012689	0
CCOC	ENSG00000152904	GGPS1	1:236443831-236446108	0.0012732	0
CCOC	ENSG00000168243	GNG4	1:236443831-236446108	0.0012732	0
CCOC	ENSG00000132823	OSER1	20:43207178-43217104	0.0012761	0
CCOC	ENSG00000131711	MAP1B	5:71746085-71751612	0.0012827	0
CCOC	ENSG00000178175	ZNF366	5:71746085-71751612	0.0012827	0
CCOC	ENSG00000162366	PDZK1IP1	1:47652226-47654319	0.0012877	0
CCOC	ENSG00000115944	COX7A2L	2:42343061-42346592	0.0013163	0
CCOC	ENSG00000143924	EML4	2:42343061-42346592	0.0013163	0
CCOC	ENSG00000162882	HAAO	2:42343061-42346592	0.0013163	0
CCOC	ENSG00000100519	PSMC6	14:53745518-53746570	0.0013203	0
CCOC	ENSG00000125378	BMP4	14:53745518-53746570	0.0013203	0
CCOC	ENSG00000058673	ZC3H11A	1:204345679-204352315	0.0013218	0
CCOC	ENSG00000133056	PIK3C2B	1:204345679-204352315	0.0013218	0
CCOC	ENSG00000143842	SOX13	1:204345679-204352315	0.0013218	0
CCOC	ENSG00000143845	ETNK2	1:204345679-204352315	0.0013218	0
CCOC	ENSG00000143850	PLEKHA6	1:204345679-204352315	0.0013218	0
CCOC	ENSG00000158615	PPP1R15B	1:204345679-204352315	0.0013218	0
CCOC	ENSG00000162873	KLHDC8A	1:204345679-204352315	0.0013218	0
CCOC	ENSG00000174567	GOLT1A	1:204345679-204352315	0.0013218	0
CCOC	ENSG00000184144	CNTN2	1:204345679-204352315	0.0013218	0
CCOC	ENSG00000198625	MDM4	1:204345679-204352315	0.0013218	0
CCOC	ENSG00000172197	MBOAT1	6:20182775-20183678	0.0013487	0
CCOC	ENSG00000102174	PHEX	X:22139749-22142924	0.001352	0
CCOC	ENSG00000100341	PNPLA5	22:44293503-44294287	0.0013621	0
CCOC	ENSG00000100344	PNPLA3	22:44293503-44294287	0.0013621	0
CCOC	ENSG00000130540	SULT4A1	22:44293503-44294287	0.0013621	0
CCOC	ENSG00000186732	MPPED1	22:44293503-44294287	0.0013621	0
CCOC	ENSG00000186976	EFCAB6	22:44293503-44294287	0.0013621	0
CCOC	ENSG00000081041	CXCL2	4:74568510-74572319	0.0013683	0
CCOC	ENSG00000109272	PF4V1	4:74568510-74572319	0.0013683	0
CCOC	ENSG00000132466	ANKRD17	4:74568510-74572319	0.0013683	0
CCOC	ENSG00000163734	CXCL3	4:74568510-74572319	0.0013683	0
CCOC	ENSG00000163735	CXCL5	4:74568510-74572319	0.0013683	0
CCOC	ENSG00000163738	MTHFD2L	4:74568510-74572319	0.0013683	0
CCOC	ENSG00000163739	CXCL1	4:74568510-74572319	0.0013683	0
CCOC	ENSG00000169429	IL8	4:74568510-74572319	0.0013683	0
CCOC	ENSG00000169435	RASSF6	4:74568510-74572319	0.0013683	0
CCOC	ENSG00000137834	SMAD6	15:66908939-66915870	0.0013703	0
CCOC	ENSG00000166949	SMAD3	15:66908939-66915870	0.0013703	0
CCOC	ENSG00000169032	MAP2K1	15:66908939-66915870	0.0013703	0
CCOC	ENSG00000146555	SDK1	7:3982432-3983750	0.0013835	0
CCOC	ENSG00000005194	CIAPIN1	16:57332586-57335395	0.0014298	0
CCOC	ENSG00000006210	CX3CL1	16:57332586-57335395	0.0014298	0
CCOC	ENSG00000070770	CSNK2A2	16:57332586-57335395	0.0014298	0
CCOC	ENSG00000088682	COQ9	16:57332586-57335395	0.0014298	0
CCOC	ENSG00000102931	ARL2BP	16:57332586-57335395	0.0014298	0
CCOC	ENSG00000102962	CCL22	16:57332586-57335395	0.0014298	0
CCOC	ENSG00000167005	NUDT21	16:57332586-57335395	0.0014298	0
CCOC	ENSG00000181938	GINS3	16:57332586-57335395	0.0014298	0
CCOC	ENSG00000198417	MT1F	16:57332586-57335395	0.0014298	0
CCOC	ENSG00000065413	ANKRD44	2:198316020-198320183	0.0014993	0
CCOC	ENSG00000115520	COQ10B	2:198316020-198320183	0.0014993	0
CCOC	ENSG00000115541	HSPE1	2:198316020-198320183	0.0014993	0
CCOC	ENSG00000115896	PLCL1	2:198316020-198320183	0.0014993	0
CCOC	ENSG00000144381	HSPD1	2:198316020-198320183	0.0014993	0
CCOC	ENSG00000152430	BOLL	2:198316020-198320183	0.0014993	0
CCOC	ENSG00000117983	MUC5B	11:1245803-1246984	0.0015239	0
CCOC	ENSG00000100220	RTCB	22:32148097-32151601	0.0015459	0
CCOC	ENSG00000043514	TRIT1	1:39491043-39493431	0.0015552	0
CCOC	ENSG00000084072	PPIE	1:39491043-39493431	0.0015552	0
CCOC	ENSG00000116954	RRAGC	1:39491043-39493431	0.0015552	0
CCOC	ENSG00000131233	GJA9	1:39491043-39493431	0.0015552	0
CCOC	ENSG00000168653	NDUFS5	1:39491043-39493431	0.0015552	0
CCOC	ENSG00000174574	AKIRIN1	1:39491043-39493431	0.0015552	0
CCOC	ENSG00000214114	MYCBP	1:39491043-39493431	0.0015552	0
CCOC	ENSG00000118007	STAG1	3:136556616-136559532	0.0015642	0
CCOC	ENSG00000168917	SLC35G2	3:136556616-136559532	0.0015642	0
CCOC	ENSG00000153714	LURAP1L	9:12808401-12811221	0.0016019	0
CCOC	ENSG00000124875	CXCL6	4:74540087-74543784	0.001628	0
CCOC	ENSG00000155636	RBM45	2:178194111-178195183	0.0016392	0
CCOC	ENSG00000143162	CREG1	1:167764598-167768012	0.0016725	0
CCOC	ENSG00000143199	ADCY10	1:167764598-167768012	0.0016725	0
CCOC	ENSG00000197965	MPZL1	1:167764598-167768012	0.0016725	0
CCOC	ENSG00000213064	SFT2D2	1:167764598-167768012	0.0016725	0
CCOC	ENSG00000111424	VDR	12:48333873-48334318	0.001682	0
CCOC	ENSG00000134291	TMEM106C	12:48333873-48334318	0.001682	0
CCOC	ENSG00000177981	ASB8	12:48333873-48334318	0.001682	0
CCOC	ENSG00000114054	PCCB	3:136467593-136473762	0.0016928	0
CCOC	ENSG00000174564	IL20RB	3:136467593-136473762	0.0016928	0
CCOC	ENSG00000174579	MSL2	3:136467593-136473762	0.0016928	0
CCOC	ENSG00000079308	TNS1	2:218890736-218895526	0.0016996	0
CCOC	ENSG00000188282	RUFY4	2:218890736-218895526	0.0016996	0
CCOC	ENSG00000133112	TPT1	13:45898944-45910712	0.0017065	0
CCOC	ENSG00000116350	SRSF4	1:29490425-29494007	0.0017113	0
CCOC	ENSG00000116353	MECR	1:29490425-29494007	0.0017113	0
CCOC	ENSG00000253304	TMEM200B	1:29490425-29494007	0.0017113	0
CCOC	ENSG00000017427	IGF1	12:102877608-102879010	0.0017382	0
CCOC	ENSG00000182185	RAD51B	14:68825622-68828625	0.0017505	0
CCOC	ENSG00000100697	DICER1	14:95234655-95237072	0.00176	0
CCOC	ENSG00000133937	GSC	14:95234655-95237072	0.00176	0
CCOC	ENSG00000157212	PAXIP1	7:154793490-154796953	0.0017878	0
CCOC	ENSG00000157219	HTR5A	7:154793490-154796953	0.0017878	0
CCOC	ENSG00000184863	RBM33	7:154793490-154796953	0.0017878	0
CCOC	ENSG00000214106	PAXIP1-AS2	7:154793490-154796953	0.0017878	0
CCOC	ENSG00000140612	SEC11A	15:85470161-85474181	0.0017906	0
CCOC	ENSG00000156222	SLC28A1	15:85470161-85474181	0.0017906	0
CCOC	ENSG00000177082	WDR73	15:85470161-85474181	0.0017906	0
CCOC	ENSG00000184206	GOLGA6L4	15:85470161-85474181	0.0017906	0
CCOC	ENSG00000058804	NDC1	1:54939961-54943797	0.0017942	0
CCOC	ENSG00000116205	TCEANC2	1:54939961-54943797	0.0017942	0
CCOC	ENSG00000116212	LRRC42	1:54939961-54943797	0.0017942	0
CCOC	ENSG00000157216	SSBP3	1:54939961-54943797	0.0017942	0
CCOC	ENSG00000198711	SSBP3-AS1	1:54939961-54943797	0.0017942	0
CCOC	ENSG00000042286	AIFM2	10:71890001-71893400	0.0018017	0
CCOC	ENSG00000079332	SAR1A	10:71890001-71893400	0.0018017	0
CCOC	ENSG00000180817	PPA1	10:71890001-71893400	0.0018017	0
CCOC	ENSG00000145832	SLC25A48	5:135040497-135042175	0.0018044	0
CCOC	ENSG00000026751	SLAMF7	1:160764568-160771390	0.0018067	0
CCOC	ENSG00000117090	SLAMF1	1:160764568-160771390	0.0018067	0
CCOC	ENSG00000117091	CD48	1:160764568-160771390	0.0018067	0
CCOC	ENSG00000122223	CD244	1:160764568-160771390	0.0018067	0
CCOC	ENSG00000122224	LY9	1:160764568-160771390	0.0018067	0
CCOC	ENSG00000132681	ATP1A4	1:160764568-160771390	0.0018067	0
CCOC	ENSG00000143224	PPOX	1:160764568-160771390	0.0018067	0
CCOC	ENSG00000158773	USF1	1:160764568-160771390	0.0018067	0
CCOC	ENSG00000162739	SLAMF6	1:160764568-160771390	0.0018067	0
CCOC	ENSG00000179914	ITLN1	1:160764568-160771390	0.0018067	0
CCOC	ENSG00000186517	ARHGAP30	1:160764568-160771390	0.0018067	0
CCOC	ENSG00000215845	TSTD1	1:160764568-160771390	0.0018067	0
CCOC	ENSG00000174083	PIK3R6	17:8709198-8711786	0.0018202	0
CCOC	ENSG00000185156	MFSD6L	17:8709198-8711786	0.0018202	0
CCOC	ENSG00000196284	SUPT3H	6:45664353-45666624	0.0018269	0
CCOC	ENSG00000102699	PARP4	13:24648528-24651008	0.0018283	0
CCOC	ENSG00000182957	SPATA13	13:24648528-24651008	0.0018283	0
CCOC	ENSG00000273167	RP11-307N16.6	13:24648528-24651008	0.0018283	0
CCOC	ENSG00000232056	AC092687.4	2:11013911-11014578	0.0018284	0
CCOC	ENSG00000088038	CNOT3	19:54605442-54607109	0.0018513	0
CCOC	ENSG00000170906	NDUFA3	19:54605442-54607109	0.0018513	0
CCOC	ENSG00000170909	OSCAR	19:54605442-54607109	0.0018513	0
CCOC	ENSG00000149654	CDH22	20:44831143-44832714	0.001855	0
CCOC	ENSG00000115649	CNPPD1	2:219756341-219763398	0.001875	0
CCOC	ENSG00000127824	TUBA4A	2:219756341-219763398	0.001875	0
CCOC	ENSG00000158552	ZFAND2B	2:219756341-219763398	0.001875	0
CCOC	ENSG00000100294	MCAT	22:43541080-43545229	0.00189	0
CCOC	ENSG00000100300	TSPO	22:43541080-43545229	0.00189	0
CCOC	ENSG00000100304	TTLL12	22:43541080-43545229	0.00189	0
CCOC	ENSG00000024526	DEPDC1	1:68960913-68963490	0.0019019	0
CCOC	ENSG00000142494	SLC47A1	17:19436332-19438519	0.0019223	0
CCOC	ENSG00000249459	ZNF286B	17:19436332-19438519	0.0019223	0
CCOC	ENSG00000005156	LIG3	17:33328058-33329515	0.001938	0
CCOC	ENSG00000132141	CCT6B	17:33328058-33329515	0.001938	0
CCOC	ENSG00000105647	PIK3R2	19:18266160-18269610	0.0019432	0
CCOC	ENSG00000216490	IFI30	19:18266160-18269610	0.0019432	0
CCOC	ENSG00000108256	NUFIP2	17:27263530-27265114	0.001948	0
CCOC	ENSG00000109103	UNC119	17:27263530-27265114	0.001948	0
CCOC	ENSG00000109118	PHF12	17:27263530-27265114	0.001948	0
CCOC	ENSG00000132581	SDF2	17:27263530-27265114	0.001948	0
CCOC	ENSG00000132589	FLOT2	17:27263530-27265114	0.001948	0
CCOC	ENSG00000160551	TAOK1	17:27263530-27265114	0.001948	0
CCOC	ENSG00000167536	DHRS13	17:27263530-27265114	0.001948	0
CCOC	ENSG00000221995	TIAF1	17:27263530-27265114	0.001948	0
CCOC	ENSG00000119801	YPEL5	2:30444287-30450540	0.0019576	0
CCOC	ENSG00000213626	LBH	2:30444287-30450540	0.0019576	0
CCOC	ENSG00000182931	WFDC10B	20:44488396-44490830	0.0020086	0
CCOC	ENSG00000080603	SRCAP	16:30404988-30407905	0.0020126	0
CCOC	ENSG00000089280	FUS	16:30404988-30407905	0.0020126	0
CCOC	ENSG00000099364	FBXL19	16:30404988-30407905	0.0020126	0
CCOC	ENSG00000099381	SETD1A	16:30404988-30407905	0.0020126	0
CCOC	ENSG00000099385	BCL7C	16:30404988-30407905	0.0020126	0
CCOC	ENSG00000102870	ZNF629	16:30404988-30407905	0.0020126	0
CCOC	ENSG00000103502	CDIPT	16:30404988-30407905	0.0020126	0
CCOC	ENSG00000103549	RNF40	16:30404988-30407905	0.0020126	0
CCOC	ENSG00000132207	SLX1A	16:30404988-30407905	0.0020126	0
CCOC	ENSG00000149923	PPP4C	16:30404988-30407905	0.0020126	0
CCOC	ENSG00000149930	TAOK2	16:30404988-30407905	0.0020126	0
CCOC	ENSG00000156853	ZNF689	16:30404988-30407905	0.0020126	0
CCOC	ENSG00000156858	PRR14	16:30404988-30407905	0.0020126	0
CCOC	ENSG00000156860	FBRS	16:30404988-30407905	0.0020126	0
CCOC	ENSG00000167394	ZNF668	16:30404988-30407905	0.0020126	0
CCOC	ENSG00000167395	ZNF646	16:30404988-30407905	0.0020126	0
CCOC	ENSG00000169221	TBC1D10B	16:30404988-30407905	0.0020126	0
CCOC	ENSG00000169592	INO80E	16:30404988-30407905	0.0020126	0
CCOC	ENSG00000169951	ZNF764	16:30404988-30407905	0.0020126	0
CCOC	ENSG00000169957	ZNF768	16:30404988-30407905	0.0020126	0
CCOC	ENSG00000179918	SEPHS2	16:30404988-30407905	0.0020126	0
CCOC	ENSG00000179958	DCTPP1	16:30404988-30407905	0.0020126	0
CCOC	ENSG00000180035	ZNF48	16:30404988-30407905	0.0020126	0
CCOC	ENSG00000180096	44440	16:30404988-30407905	0.0020126	0
CCOC	ENSG00000180209	MYLPF	16:30404988-30407905	0.0020126	0
CCOC	ENSG00000197162	ZNF785	16:30404988-30407905	0.0020126	0
CCOC	ENSG00000229809	ZNF688	16:30404988-30407905	0.0020126	0
CCOC	ENSG00000130177	CDC16	13:115093680-115093830	0.0020127	0
CCOC	ENSG00000198824	CHAMP1	13:115093680-115093830	0.0020127	0
CCOC	ENSG00000127481	UBR4	1:20510835-20514644	0.0020263	0
CCOC	ENSG00000127483	HP1BP3	1:20510835-20514644	0.0020263	0
CCOC	ENSG00000162543	UBXN10	1:20510835-20514644	0.0020263	0
CCOC	ENSG00000088298	EDEM2	20:33733984-33736900	0.002044	0
CCOC	ENSG00000100991	TRPC4AP	20:33733984-33736900	0.002044	0
CCOC	ENSG00000101000	PROCR	20:33733984-33736900	0.002044	0
CCOC	ENSG00000101464	PIGU	20:33733984-33736900	0.002044	0
CCOC	ENSG00000125966	MMP24	20:33733984-33736900	0.002044	0
CCOC	ENSG00000125991	ERGIC3	20:33733984-33736900	0.002044	0
CCOC	ENSG00000198646	NCOA6	20:33733984-33736900	0.002044	0
CCOC	ENSG00000242372	EIF6	20:33733984-33736900	0.002044	0
CCOC	ENSG00000244462	RBM12	20:33733984-33736900	0.002044	0
CCOC	ENSG00000063046	EIF4B	12:53845160-53848270	0.0020696	0
CCOC	ENSG00000094914	AAAS	12:53845160-53848270	0.0020696	0
CCOC	ENSG00000094916	CBX5	12:53845160-53848270	0.0020696	0
CCOC	ENSG00000111481	COPZ1	12:53845160-53848270	0.0020696	0
CCOC	ENSG00000123349	PFDN5	12:53845160-53848270	0.0020696	0
CCOC	ENSG00000135409	AMHR2	12:53845160-53848270	0.0020696	0
CCOC	ENSG00000135486	HNRNPA1	12:53845160-53848270	0.0020696	0
CCOC	ENSG00000139546	TARBP2	12:53845160-53848270	0.0020696	0
CCOC	ENSG00000139574	NPFF	12:53845160-53848270	0.0020696	0
CCOC	ENSG00000139625	MAP3K12	12:53845160-53848270	0.0020696	0
CCOC	ENSG00000139631	CSAD	12:53845160-53848270	0.0020696	0
CCOC	ENSG00000139637	C12orf10	12:53845160-53848270	0.0020696	0
CCOC	ENSG00000139651	ZNF740	12:53845160-53848270	0.0020696	0
CCOC	ENSG00000170653	ATF7	12:53845160-53848270	0.0020696	0
CCOC	ENSG00000185591	SP1	12:53845160-53848270	0.0020696	0
CCOC	ENSG00000197111	PCBP2	12:53845160-53848270	0.0020696	0
CCOC	ENSG00000205352	PRR13	12:53845160-53848270	0.0020696	0
CCOC	ENSG00000100281	HMGXB4	22:35792217-35797857	0.0021083	0
CCOC	ENSG00000100292	HMOX1	22:35792217-35797857	0.0021083	0
CCOC	ENSG00000100297	MCM5	22:35792217-35797857	0.0021083	0
CCOC	ENSG00000088325	TPX2	20:30318150-30319883	0.0021211	0
CCOC	ENSG00000101294	HM13	20:30318150-30319883	0.0021211	0
CCOC	ENSG00000101306	MYLK2	20:30318150-30319883	0.0021211	0
CCOC	ENSG00000171552	BCL2L1	20:30318150-30319883	0.0021211	0
CCOC	ENSG00000099995	SF3A1	22:31572256-31575984	0.0021326	0
CCOC	ENSG00000141279	NPEPPS	17:45568892-45571308	0.0021604	0
CCOC	ENSG00000198933	TBKBP1	17:45568892-45571308	0.0021604	0
CCOC	ENSG00000145850	TIMD4	5:156346943-156348330	0.0021655	0
CCOC	ENSG00000115756	HPCAL1	2:10564280-10564430	0.0021768	0
CCOC	ENSG00000026025	VIM	10:16884835-16887951	0.0022209	0
CCOC	ENSG00000107611	CUBN	10:16884835-16887951	0.0022209	0
CCOC	ENSG00000137310	TCF19	6:31131849-31132100	0.0022231	0
CCOC	ENSG00000204525	HLA-C	6:31131849-31132100	0.0022231	0
CCOC	ENSG00000110801	PSMD9	12:122478357-122479432	0.0022493	0
CCOC	ENSG00000110987	BCL7A	12:122478357-122479432	0.0022493	0
CCOC	ENSG00000158023	WDR66	12:122478357-122479432	0.0022493	0
CCOC	ENSG00000144468	RHBDD1	2:227618550-227629066	0.0022773	0
CCOC	ENSG00000169047	IRS1	2:227618550-227629066	0.0022773	0
CCOC	ENSG00000101161	PRPF6	20:62707462-62712371	0.0022788	0
CCOC	ENSG00000101216	GMEB2	20:62707462-62712371	0.0022788	0
CCOC	ENSG00000125510	OPRL1	20:62707462-62712371	0.0022788	0
CCOC	ENSG00000171700	RGS19	20:62707462-62712371	0.0022788	0
CCOC	ENSG00000197114	ZGPAT	20:62707462-62712371	0.0022788	0
CCOC	ENSG00000203880	PCMTD2	20:62707462-62712371	0.0022788	0
CCOC	ENSG00000203896	LIME1	20:62707462-62712371	0.0022788	0
CCOC	ENSG00000197971	MBP	18:74718156-74719570	0.0022831	0
CCOC	ENSG00000079999	KEAP1	19:10229259-10233183	0.0022839	0
CCOC	ENSG00000105364	MRPL4	19:10229259-10233183	0.0022839	0
CCOC	ENSG00000127452	FBXL12	19:10229259-10233183	0.0022839	0
CCOC	ENSG00000129347	KRI1	19:10229259-10233183	0.0022839	0
CCOC	ENSG00000129351	ILF3	19:10229259-10233183	0.0022839	0
CCOC	ENSG00000130733	YIPF2	19:10229259-10233183	0.0022839	0
CCOC	ENSG00000130803	ZNF317	19:10229259-10233183	0.0022839	0
CCOC	ENSG00000130810	PPAN	19:10229259-10233183	0.0022839	0
CCOC	ENSG00000130811	EIF3G	19:10229259-10233183	0.0022839	0
CCOC	ENSG00000130816	DNMT1	19:10229259-10233183	0.0022839	0
CCOC	ENSG00000161847	RAVER1	19:10229259-10233183	0.0022839	0
CCOC	ENSG00000171469	ZNF561	19:10229259-10233183	0.0022839	0
CCOC	ENSG00000174652	ZNF266	19:10229259-10233183	0.0022839	0
CCOC	ENSG00000188321	ZNF559	19:10229259-10233183	0.0022839	0
CCOC	ENSG00000196110	ZNF699	19:10229259-10233183	0.0022839	0
CCOC	ENSG00000197961	ZNF121	19:10229259-10233183	0.0022839	0
CCOC	ENSG00000244165	P2RY11	19:10229259-10233183	0.0022839	0
CCOC	ENSG00000141446	ESCO1	18:20142638-20144411	0.0022895	0
CCOC	ENSG00000158201	ABHD3	18:20142638-20144411	0.0022895	0
CCOC	ENSG00000124444	ZNF576	19:43685048-43691428	0.0023188	0
CCOC	ENSG00000124459	ZNF45	19:43685048-43691428	0.0023188	0
CCOC	ENSG00000159905	ZNF221	19:43685048-43691428	0.0023188	0
CCOC	ENSG00000167378	IRGQ	19:43685048-43691428	0.0023188	0
CCOC	ENSG00000167380	ZNF226	19:43685048-43691428	0.0023188	0
CCOC	ENSG00000167625	ZNF526	19:43685048-43691428	0.0023188	0
CCOC	ENSG00000167637	ZNF283	19:43685048-43691428	0.0023188	0
CCOC	ENSG00000178386	ZNF223	19:43685048-43691428	0.0023188	0
CCOC	ENSG00000186026	ZNF284	19:43685048-43691428	0.0023188	0
CCOC	ENSG00000204920	ZNF155	19:43685048-43691428	0.0023188	0
CCOC	ENSG00000204941	PSG5	19:43685048-43691428	0.0023188	0
CCOC	ENSG00000234465	PINLYP	19:43685048-43691428	0.0023188	0
CCOC	ENSG00000243137	PSG4	19:43685048-43691428	0.0023188	0
CCOC	ENSG00000256294	ZNF225	19:43685048-43691428	0.0023188	0
CCOC	ENSG00000263002	ZNF234	19:43685048-43691428	0.0023188	0
CCOC	ENSG00000267680	ZNF224	19:43685048-43691428	0.0023188	0
CCOC	ENSG00000196208	GREB1	2:11717160-11718636	0.0023478	0
CCOC	ENSG00000136152	COG3	13:46055226-46058219	0.0023812	0
CCOC	ENSG00000119950	MXI1	10:112028740-112030402	0.0023835	0
CCOC	ENSG00000119953	SMNDC1	10:112028740-112030402	0.0023835	0
CCOC	ENSG00000214413	BBIP1	10:112028740-112030402	0.0023835	0
CCOC	ENSG00000158092	NCK1	3:136648455-136650362	0.0024049	0
CCOC	ENSG00000074964	ARHGEF10L	1:17959102-17960733	0.0024073	0
CCOC	ENSG00000117148	ACTL8	1:17959102-17960733	0.0024073	0
CCOC	ENSG00000175110	MRPS22	3:139152910-139154733	0.0024101	0
CCOC	ENSG00000028203	VEZT	12:95591973-95602330	0.0024252	0
CCOC	ENSG00000180263	FGD6	12:95591973-95602330	0.0024252	0
CCOC	ENSG00000128274	A4GALT	22:43107292-43108931	0.0024617	0
CCOC	ENSG00000114857	NKTR	3:42098692-42111283	0.0024913	0
CCOC	ENSG00000240747	KRBOX1	3:42098692-42111283	0.0024913	0
CCOC	ENSG00000185721	DRG1	22:31889362-31894006	0.0025146	0
CCOC	ENSG00000100151	PICK1	22:38452463-38454232	0.0025349	0
CCOC	ENSG00000198542	ITGBL1	13:102125475-102127504	0.0025394	0
CCOC	ENSG00000134419	RPS15A	16:19016523-19018195	0.0025484	0
CCOC	ENSG00000167186	COQ7	16:19016523-19018195	0.0025484	0
CCOC	ENSG00000170537	TMC7	16:19016523-19018195	0.0025484	0
CCOC	ENSG00000196415	PRTN3	19:843107-844883	0.0025737	0
CCOC	ENSG00000197561	ELANE	19:843107-844883	0.0025737	0
CCOC	ENSG00000184719	RNLS	10:90341923-90343664	0.0026058	0
CCOC	ENSG00000204022	LIPJ	10:90341923-90343664	0.0026058	0
CCOC	ENSG00000109794	FAM149A	4:187065125-187067022	0.0026115	0
CCOC	ENSG00000145476	CYP4V2	4:187065125-187067022	0.0026115	0
CCOC	ENSG00000164342	TLR3	4:187065125-187067022	0.0026115	0
CCOC	ENSG00000003056	M6PR	12:8184352-8188918	0.0026324	0
CCOC	ENSG00000065970	FOXJ2	12:8184352-8188918	0.0026324	0
CCOC	ENSG00000089818	NECAP1	12:8184352-8188918	0.0026324	0
CCOC	ENSG00000171860	C3AR1	12:8184352-8188918	0.0026324	0
CCOC	ENSG00000172262	ZNF131	5:42999902-43001290	0.0026522	0
CCOC	ENSG00000177453	NIM1K	5:42999902-43001290	0.0026522	0
CCOC	ENSG00000116717	GADD45A	1:67987267-67988362	0.0026637	0
CCOC	ENSG00000213853	EMP2	16:10646501-10647657	0.0026642	0
CCOC	ENSG00000083535	PIBF1	13:73613210-73616532	0.0026922	0
CCOC	ENSG00000102554	KLF5	13:73613210-73616532	0.0026922	0
CCOC	ENSG00000136122	BORA	13:73613210-73616532	0.0026922	0
CCOC	ENSG00000187147	RNF220	1:45053838-45055038	0.0027003	0
CCOC	ENSG00000091009	RBM27	5:145560769-145563221	0.0027355	0
CCOC	ENSG00000113649	TCERG1	5:145560769-145563221	0.0027355	0
CCOC	ENSG00000133706	LARS	5:145560769-145563221	0.0027355	0
CCOC	ENSG00000047849	MAP4	3:48054090-48059134	0.0027403	0
CCOC	ENSG00000068745	IP6K2	3:48054090-48059134	0.0027403	0
CCOC	ENSG00000164045	CDC25A	3:48054090-48059134	0.0027403	0
CCOC	ENSG00000164048	ZNF589	3:48054090-48059134	0.0027403	0
CCOC	ENSG00000172113	NME6	3:48054090-48059134	0.0027403	0
CCOC	ENSG00000189283	FHIT	3:60728325-60728934	0.0027608	0
CCOC	ENSG00000041802	LSG1	3:193847288-193861477	0.0027614	0
CCOC	ENSG00000114315	HES1	3:193847288-193861477	0.0027614	0
CCOC	ENSG00000133657	ATP13A3	3:193847288-193861477	0.0027614	0
CCOC	ENSG00000145014	TMEM44	3:193847288-193861477	0.0027614	0
CCOC	ENSG00000172061	LRRC15	3:193847288-193861477	0.0027614	0
CCOC	ENSG00000134323	MYCN	2:16129840-16131840	0.0027797	0
CCOC	ENSG00000101331	CCM2L	20:30605577-30607404	0.0027938	0
CCOC	ENSG00000260903	XKR7	20:30605577-30607404	0.0027938	0
CCOC	ENSG00000140259	MFAP1	15:44396497-44399935	0.0028014	0
CCOC	ENSG00000168803	ADAL	15:44396497-44399935	0.0028014	0
CCOC	ENSG00000171877	FRMD5	15:44396497-44399935	0.0028014	0
CCOC	ENSG00000181481	RNF135	17:29057678-29060619	0.0028043	0
CCOC	ENSG00000128052	KDR	4:55991345-55992368	0.002842	0
CCOC	ENSG00000062598	ELMO2	20:45027240-45032450	0.0028679	0
CCOC	ENSG00000080189	SLC35C2	20:45027240-45032450	0.0028679	0
CCOC	ENSG00000101017	CD40	20:45027240-45032450	0.0028679	0
CCOC	ENSG00000128928	IVD	15:40712344-40714673	0.0029171	0
CCOC	ENSG00000128944	KNSTRN	15:40712344-40714673	0.0029171	0
CCOC	ENSG00000137841	PLCB2	15:40712344-40714673	0.0029171	0
CCOC	ENSG00000137843	PAK6	15:40712344-40714673	0.0029171	0
CCOC	ENSG00000140320	BAHD1	15:40712344-40714673	0.0029171	0
CCOC	ENSG00000140323	DISP2	15:40712344-40714673	0.0029171	0
CCOC	ENSG00000169105	CHST14	15:40712344-40714673	0.0029171	0
CCOC	ENSG00000176753	C15orf56	15:40712344-40714673	0.0029171	0
CCOC	ENSG00000230778	ANKRD63	15:40712344-40714673	0.0029171	0
CCOC	ENSG00000233041	PHGR1	15:40712344-40714673	0.0029171	0
CCOC	ENSG00000151746	BICD1	12:32291560-32294070	0.00292	0
CCOC	ENSG00000130222	GADD45G	9:92232720-92233611	0.0029476	0
CCOC	ENSG00000144488	ESPNL	2:239045402-239048802	0.0029775	0
CCOC	ENSG00000168427	KLHL30	2:239045402-239048802	0.0029775	0
CCOC	ENSG00000013374	NUB1	7:151036515-151040501	0.0030001	0
CCOC	ENSG00000082014	SMARCD3	7:151036515-151040501	0.0030001	0
CCOC	ENSG00000133612	AGAP3	7:151036515-151040501	0.0030001	0
CCOC	ENSG00000164889	SLC4A2	7:151036515-151040501	0.0030001	0
CCOC	ENSG00000173261	PLAC8L1	5:145517108-145518537	0.0030071	0
CCOC	ENSG00000033867	SLC4A7	3:27410290-27411399	0.0030073	0
CCOC	ENSG00000163491	NEK10	3:27410290-27411399	0.0030073	0
CCOC	ENSG00000138100	TRIM54	2:27937389-27940690	0.0030274	0
CCOC	ENSG00000157992	KRTCAP3	2:27937389-27940690	0.0030274	0
CCOC	ENSG00000228474	OST4	2:27937389-27940690	0.0030274	0
CCOC	ENSG00000011332	DPF1	19:38513377-38516652	0.0030411	0
CCOC	ENSG00000105738	SIPA1L3	19:38513377-38516652	0.0030411	0
CCOC	ENSG00000167642	SPINT2	19:38513377-38516652	0.0030411	0
CCOC	ENSG00000163138	PACRGL	4:20701078-20703258	0.003045	0
CCOC	ENSG00000137809	ITGA11	15:68710099-68714720	0.0030525	0
CCOC	ENSG00000089127	OAS1	12:113645205-113647815	0.0030655	0
CCOC	ENSG00000111344	RASAL1	12:113645205-113647815	0.0030655	0
CCOC	ENSG00000139405	RITA1	12:113645205-113647815	0.0030655	0
CCOC	ENSG00000166578	IQCD	12:113645205-113647815	0.0030655	0
CCOC	ENSG00000186815	TPCN1	12:113645205-113647815	0.0030655	0
CCOC	ENSG00000076662	ICAM3	19:10210923-10219202	0.0030685	0
CCOC	ENSG00000105397	TYK2	19:10210923-10219202	0.0030685	0
CCOC	ENSG00000105401	CDC37	19:10210923-10219202	0.0030685	0
CCOC	ENSG00000127616	SMARCA4	19:10210923-10219202	0.0030685	0
CCOC	ENSG00000130734	ATG4D	19:10210923-10219202	0.0030685	0
CCOC	ENSG00000130812	ANGPTL6	19:10210923-10219202	0.0030685	0
CCOC	ENSG00000130813	C19orf66	19:10210923-10219202	0.0030685	0
CCOC	ENSG00000130818	ZNF426	19:10210923-10219202	0.0030685	0
CCOC	ENSG00000171466	ZNF562	19:10210923-10219202	0.0030685	0
CCOC	ENSG00000180739	S1PR5	19:10210923-10219202	0.0030685	0
CCOC	ENSG00000188629	ZNF177	19:10210923-10219202	0.0030685	0
CCOC	ENSG00000196605	ZNF846	19:10210923-10219202	0.0030685	0
CCOC	ENSG00000213339	QTRT1	19:10210923-10219202	0.0030685	0
CCOC	ENSG00000243207	PPAN-P2RY11	19:10210923-10219202	0.0030685	0
CCOC	ENSG00000267673	FDX1L	19:10210923-10219202	0.0030685	0
CCOC	ENSG00000120341	SEC16B	1:177937260-177940368	0.0030899	0
CCOC	ENSG00000073849	ST6GAL1	3:186692668-186693038	0.003106	0
CCOC	ENSG00000181092	ADIPOQ	3:186692668-186693038	0.003106	0
CCOC	ENSG00000076108	BAZ2A	12:57038322-57040706	0.0031618	0
CCOC	ENSG00000123342	MMP19	12:57038322-57040706	0.0031618	0
CCOC	ENSG00000123374	CDK2	12:57038322-57040706	0.0031618	0
CCOC	ENSG00000135392	DNAJC14	12:57038322-57040706	0.0031618	0
CCOC	ENSG00000135482	ZC3H10	12:57038322-57040706	0.0031618	0
CCOC	ENSG00000166860	ZBTB39	12:57038322-57040706	0.0031618	0
CCOC	ENSG00000166987	MBD6	12:57038322-57040706	0.0031618	0
CCOC	ENSG00000170515	PA2G4	12:57038322-57040706	0.0031618	0
CCOC	ENSG00000170581	STAT2	12:57038322-57040706	0.0031618	0
CCOC	ENSG00000198056	PRIM1	12:57038322-57040706	0.0031618	0
CCOC	ENSG00000141682	PMAIP1	18:57513981-57515470	0.0031623	0
CCOC	ENSG00000122375	OPN4	10:88359842-88360671	0.0031703	0
CCOC	ENSG00000137337	MDC1	6:31237061-31241414	0.0031925	0
CCOC	ENSG00000168477	TNXB	6:31237061-31241414	0.0031925	0
CCOC	ENSG00000198563	DDX39B	6:31237061-31241414	0.0031925	0
CCOC	ENSG00000204305	AGER	6:31237061-31241414	0.0031925	0
CCOC	ENSG00000204366	ZBTB12	6:31237061-31241414	0.0031925	0
CCOC	ENSG00000204392	LSM2	6:31237061-31241414	0.0031925	0
CCOC	ENSG00000204410	MSH5	6:31237061-31241414	0.0031925	0
CCOC	ENSG00000204427	ABHD16A	6:31237061-31241414	0.0031925	0
CCOC	ENSG00000204472	AIF1	6:31237061-31241414	0.0031925	0
CCOC	ENSG00000204475	NCR3	6:31237061-31241414	0.0031925	0
CCOC	ENSG00000204482	LST1	6:31237061-31241414	0.0031925	0
CCOC	ENSG00000204498	NFKBIL1	6:31237061-31241414	0.0031925	0
CCOC	ENSG00000204516	MICB	6:31237061-31241414	0.0031925	0
CCOC	ENSG00000204520	MICA	6:31237061-31241414	0.0031925	0
CCOC	ENSG00000204531	POU5F1	6:31237061-31241414	0.0031925	0
CCOC	ENSG00000204538	PSORS1C2	6:31237061-31241414	0.0031925	0
CCOC	ENSG00000204540	PSORS1C1	6:31237061-31241414	0.0031925	0
CCOC	ENSG00000204569	PPP1R10	6:31237061-31241414	0.0031925	0
CCOC	ENSG00000204576	PRR3	6:31237061-31241414	0.0031925	0
CCOC	ENSG00000206344	HCG27	6:31237061-31241414	0.0031925	0
CCOC	ENSG00000213676	ATF6B	6:31237061-31241414	0.0031925	0
CCOC	ENSG00000221988	PPT2	6:31237061-31241414	0.0031925	0
CCOC	ENSG00000227507	LTB	6:31237061-31241414	0.0031925	0
CCOC	ENSG00000228727	SAPCD1	6:31237061-31241414	0.0031925	0
CCOC	ENSG00000234745	HLA-B	6:31237061-31241414	0.0031925	0
CCOC	ENSG00000240053	LY6G5B	6:31237061-31241414	0.0031925	0
CCOC	ENSG00000241404	EGFL8	6:31237061-31241414	0.0031925	0
CCOC	ENSG00000133121	STARD13	13:33746450-33747310	0.0032489	0
CCOC	ENSG00000173726	TOMM20	1:235267120-235269221	0.0032726	0
CCOC	ENSG00000110888	CAPRIN2	12:31643388-31646487	0.0032797	0
CCOC	ENSG00000170456	DENND5B	12:31643388-31646487	0.0032797	0
CCOC	ENSG00000056487	PHF21B	22:45327200-45327350	0.0032811	0
CCOC	ENSG00000008128	CDK11A	1:761579-764181	0.0032858	0
CCOC	ENSG00000078808	SDF4	1:761579-764181	0.0032858	0
CCOC	ENSG00000127054	CPSF3L	1:761579-764181	0.0032858	0
CCOC	ENSG00000160072	ATAD3B	1:761579-764181	0.0032858	0
CCOC	ENSG00000160087	UBE2J2	1:761579-764181	0.0032858	0
CCOC	ENSG00000169972	PUSL1	1:761579-764181	0.0032858	0
CCOC	ENSG00000187961	KLHL17	1:761579-764181	0.0032858	0
CCOC	ENSG00000188976	NOC2L	1:761579-764181	0.0032858	0
CCOC	ENSG00000221978	CCNL2	1:761579-764181	0.0032858	0
CCOC	ENSG00000248333	CDK11B	1:761579-764181	0.0032858	0
CCOC	ENSG00000166441	RPL27A	11:9480445-9485445	0.0033261	0
CCOC	ENSG00000166478	ZNF143	11:9480445-9485445	0.0033261	0
CCOC	ENSG00000166483	WEE1	11:9480445-9485445	0.0033261	0
CCOC	ENSG00000205339	IPO7	11:9480445-9485445	0.0033261	0
CCOC	ENSG00000268403	AC132192.1	11:9480445-9485445	0.0033261	0
CCOC	ENSG00000069020	MAST4	5:65736005-65736627	0.0033472	0
CCOC	ENSG00000108582	CPD	17:29139019-29143760	0.0033522	0
CCOC	ENSG00000176390	CRLF3	17:29139019-29143760	0.0033522	0
CCOC	ENSG00000178585	CTNNBIP1	1:9959842-9962728	0.0033576	0
CCOC	ENSG00000165548	TMEM63C	14:77575739-77578845	0.0033815	0
CCOC	ENSG00000198894	CIPC	14:77575739-77578845	0.0033815	0
CCOC	ENSG00000259164	RP11-463C8.4	14:77575739-77578845	0.0033815	0
CCOC	ENSG00000137404	NRM	6:31506479-31511351	0.0033895	0
CCOC	ENSG00000204304	PBX2	6:31506479-31511351	0.0033895	0
CCOC	ENSG00000204315	FKBPL	6:31506479-31511351	0.0033895	0
CCOC	ENSG00000204344	STK19	6:31506479-31511351	0.0033895	0
CCOC	ENSG00000204348	DXO	6:31506479-31511351	0.0033895	0
CCOC	ENSG00000204351	SKIV2L	6:31506479-31511351	0.0033895	0
CCOC	ENSG00000204356	NELFE	6:31506479-31511351	0.0033895	0
CCOC	ENSG00000204385	SLC44A4	6:31506479-31511351	0.0033895	0
CCOC	ENSG00000204394	VARS	6:31506479-31511351	0.0033895	0
CCOC	ENSG00000204435	CSNK2B	6:31506479-31511351	0.0033895	0
CCOC	ENSG00000204438	GPANK1	6:31506479-31511351	0.0033895	0
CCOC	ENSG00000204439	C6orf47	6:31506479-31511351	0.0033895	0
CCOC	ENSG00000204463	BAG6	6:31506479-31511351	0.0033895	0
CCOC	ENSG00000204536	CCHCR1	6:31506479-31511351	0.0033895	0
CCOC	ENSG00000204560	DHX16	6:31506479-31511351	0.0033895	0
CCOC	ENSG00000204574	ABCF1	6:31506479-31511351	0.0033895	0
CCOC	ENSG00000213719	CLIC1	6:31506479-31511351	0.0033895	0
CCOC	ENSG00000213760	ATP6V1G2	6:31506479-31511351	0.0033895	0
CCOC	ENSG00000213780	GTF2H4	6:31506479-31511351	0.0033895	0
CCOC	ENSG00000254870	ATP6V1G2-DDX39B	6:31506479-31511351	0.0033895	0
CCOC	ENSG00000061936	SFSWAP	12:132284379-132285466	0.0034014	0
CCOC	ENSG00000136155	SCEL	13:78094925-78096943	0.0034049	0
CCOC	ENSG00000115524	SF3B1	2:198157048-198163699	0.0034063	0
CCOC	ENSG00000115540	MOB4	2:198157048-198163699	0.0034063	0
CCOC	ENSG00000013503	POLR3B	12:107233473-107236006	0.003422	0
CCOC	ENSG00000111785	RIC8B	12:107233473-107236006	0.003422	0
CCOC	ENSG00000172201	ID4	6:19691137-19692642	0.0034427	0
CCOC	ENSG00000149218	ENDOD1	11:94821592-94824472	0.0034441	0
CCOC	ENSG00000235268	KDM4E	11:94821592-94824472	0.0034441	0
CCOC	ENSG00000005007	UPF1	19:19495512-19500793	0.0034689	0
CCOC	ENSG00000105656	ELL	19:19495512-19500793	0.0034689	0
CCOC	ENSG00000167491	GATAD2A	19:19495512-19500793	0.0034689	0
CCOC	ENSG00000186010	NDUFA13	19:19495512-19500793	0.0034689	0
CCOC	ENSG00000176788	BASP1	5:17126700-17130152	0.0034922	0
CCOC	ENSG00000071054	MAP4K4	2:101884482-101884770	0.0034998	0
CCOC	ENSG00000158435	CNOT11	2:101884482-101884770	0.0034998	0
CCOC	ENSG00000163162	RNF149	2:101884482-101884770	0.0034998	0
CCOC	ENSG00000110321	EIF4G2	11:9944140-9946067	0.0035002	0
CCOC	ENSG00000133812	SBF2	11:9944140-9946067	0.0035002	0
CCOC	ENSG00000100982	PCIF1	20:44509180-44510640	0.0035009	0
CCOC	ENSG00000124257	NEURL2	20:44509180-44510640	0.0035009	0
CCOC	ENSG00000168612	ZSWIM1	20:44509180-44510640	0.0035009	0
CCOC	ENSG00000198026	ZNF335	20:44509180-44510640	0.0035009	0
CCOC	ENSG00000198185	ZNF334	20:44509180-44510640	0.0035009	0
CCOC	ENSG00000204070	SYS1	20:44509180-44510640	0.0035009	0
CCOC	ENSG00000066056	TIE1	1:43766626-43769328	0.0035274	0
CCOC	ENSG00000117407	ARTN	1:43766626-43769328	0.0035274	0
CCOC	ENSG00000159479	MED8	1:43766626-43769328	0.0035274	0
CCOC	ENSG00000178922	HYI	1:43766626-43769328	0.0035274	0
CCOC	ENSG00000198815	FOXJ3	1:43766626-43769328	0.0035274	0
CCOC	ENSG00000120549	KIAA1217	10:24744420-24747646	0.0035287	0
CCOC	ENSG00000086570	FAT2	5:151096997-151099961	0.0035394	0
CCOC	ENSG00000113140	SPARC	5:151096997-151099961	0.0035394	0
CCOC	ENSG00000145907	G3BP1	5:151096997-151099961	0.0035394	0
CCOC	ENSG00000177556	ATOX1	5:151096997-151099961	0.0035394	0
CCOC	ENSG00000071575	TRIB2	2:12854212-12863312	0.0035556	0
CCOC	ENSG00000135220	UGT2A3	4:69590340-69590581	0.003558	0
CCOC	ENSG00000196620	UGT2B15	4:69590340-69590581	0.003558	0
CCOC	ENSG00000197888	UGT2B17	4:69590340-69590581	0.003558	0
CCOC	ENSG00000134748	PRPF38A	1:52816063-52817705	0.003559	0
CCOC	ENSG00000154222	CC2D1B	1:52816063-52817705	0.003559	0
CCOC	ENSG00000056661	PCGF2	17:36901706-36910345	0.0035945	0
CCOC	ENSG00000108294	PSMB3	17:36901706-36910345	0.0035945	0
CCOC	ENSG00000108298	RPL19	17:36901706-36910345	0.0035945	0
CCOC	ENSG00000108306	FBXL20	17:36901706-36910345	0.0035945	0
CCOC	ENSG00000122085	MTERFD2	2:242822723-242825706	0.0035945	0
CCOC	ENSG00000125686	MED1	17:36901706-36910345	0.0035945	0
CCOC	ENSG00000125691	RPL23	17:36901706-36910345	0.0035945	0
CCOC	ENSG00000131748	STARD3	17:36901706-36910345	0.0035945	0
CCOC	ENSG00000162804	SNED1	2:242822723-242825706	0.0035945	0
CCOC	ENSG00000167258	CDK12	17:36901706-36910345	0.0035945	0
CCOC	ENSG00000168395	ING5	2:242822723-242825706	0.0035945	0
CCOC	ENSG00000168397	ATG4B	2:242822723-242825706	0.0035945	0
CCOC	ENSG00000230055	CISD3	17:36901706-36910345	0.0035945	0
CCOC	ENSG00000197077	KIAA1671	22:25542843-25542944	0.0036381	0
CCOC	ENSG00000001631	KRIT1	7:92156485-92158884	0.0036433	0
CCOC	ENSG00000105810	CDK6	7:92156485-92158884	0.0036433	0
CCOC	ENSG00000127914	AKAP9	7:92156485-92158884	0.0036433	0
CCOC	ENSG00000127980	PEX1	7:92156485-92158884	0.0036433	0
CCOC	ENSG00000127993	RBM48	7:92156485-92158884	0.0036433	0
CCOC	ENSG00000157259	GATAD1	7:92156485-92158884	0.0036433	0
CCOC	ENSG00000234545	FAM133B	7:92156485-92158884	0.0036433	0
CCOC	ENSG00000173068	BNC2	9:16652620-16654430	0.0036459	0
CCOC	ENSG00000134917	ADAMTS8	11:130035074-130038837	0.0036565	0
CCOC	ENSG00000149418	ST14	11:130035074-130038837	0.0036565	0
CCOC	ENSG00000170325	PRDM10	11:130035074-130038837	0.0036565	0
CCOC	ENSG00000136014	USP44	12:95944220-95946576	0.0036592	0
CCOC	ENSG00000092470	WDR76	15:44953852-44959851	0.0036608	0
CCOC	ENSG00000104133	SPG11	15:44953852-44959851	0.0036608	0
CCOC	ENSG00000129680	MAP7D3	X:135066429-135069160	0.0036608	0
CCOC	ENSG00000137770	CTDSPL2	15:44953852-44959851	0.0036608	0
CCOC	ENSG00000166710	B2M	15:44953852-44959851	0.0036608	0
CCOC	ENSG00000166762	CATSPER2	15:44953852-44959851	0.0036608	0
CCOC	ENSG00000169446	MMGT1	X:135066429-135069160	0.0036608	0
CCOC	ENSG00000185880	TRIM69	15:44953852-44959851	0.0036608	0
CCOC	ENSG00000198689	SLC9A6	X:135066429-135069160	0.0036608	0
CCOC	ENSG00000229474	PATL2	15:44953852-44959851	0.0036608	0
CCOC	ENSG00000114541	FRMD4B	3:69226867-69232646	0.0036963	0
CCOC	ENSG00000144746	ARL6IP5	3:69226867-69232646	0.0036963	0
CCOC	ENSG00000163378	EOGT	3:69226867-69232646	0.0036963	0
CCOC	ENSG00000163380	LMOD3	3:69226867-69232646	0.0036963	0
CCOC	ENSG00000055483	USP36	17:76675226-76678224	0.0037122	0
CCOC	ENSG00000108669	CYTH1	17:76675226-76678224	0.0037122	0
CCOC	ENSG00000187775	DNAH17	17:76675226-76678224	0.0037122	0
CCOC	ENSG00000162367	TAL1	1:47788597-47792158	0.003723	0
CCOC	ENSG00000166123	GPT2	16:46951241-46955206	0.0037538	0
CCOC	ENSG00000171241	SHCBP1	16:46951241-46955206	0.0037538	0
CCOC	ENSG00000189339	SLC35E2B	1:1608731-1611112	0.0037823	0
CCOC	ENSG00000215790	SLC35E2	1:1608731-1611112	0.0037823	0
CCOC	ENSG00000062725	APPBP2	17:57968945-57972273	0.0037894	0
CCOC	ENSG00000068097	HEATR6	17:57968945-57972273	0.0037894	0
CCOC	ENSG00000108423	TUBD1	17:57968945-57972273	0.0037894	0
CCOC	ENSG00000108443	RPS6KB1	17:57968945-57972273	0.0037894	0
CCOC	ENSG00000167447	SMG8	17:57968945-57972273	0.0037894	0
CCOC	ENSG00000170836	PPM1D	17:57968945-57972273	0.0037894	0
CCOC	ENSG00000182628	SKA2	17:57968945-57972273	0.0037894	0
CCOC	ENSG00000112406	HECA	6:139610500-139615157	0.0038446	0
CCOC	ENSG00000135597	REPS1	6:139610500-139615157	0.0038446	0
CCOC	ENSG00000146386	ABRACL	6:139610500-139615157	0.0038446	0
CCOC	ENSG00000164440	TXLNB	6:139610500-139615157	0.0038446	0
CCOC	ENSG00000164442	CITED2	6:139610500-139615157	0.0038446	0
CCOC	ENSG00000176476	CCDC101	16:28607121-28610146	0.0038541	0
CCOC	ENSG00000178952	TUFM	16:28607121-28610146	0.0038541	0
CCOC	ENSG00000197165	SULT1A2	16:28607121-28610146	0.0038541	0
CCOC	ENSG00000110693	SOX6	11:15821029-15823092	0.0038603	0
CCOC	ENSG00000110696	C11orf58	11:15821029-15823092	0.0038603	0
CCOC	ENSG00000138030	KHK	2:28169267-28169867	0.0038643	0
CCOC	ENSG00000173156	RHOD	11:66647254-66648072	0.0038801	0
CCOC	ENSG00000173599	PC	11:66647254-66648072	0.0038801	0
CCOC	ENSG00000173621	LRFN4	11:66647254-66648072	0.0038801	0
CCOC	ENSG00000173653	RCE1	11:66647254-66648072	0.0038801	0
CCOC	ENSG00000174080	CTSF	11:66647254-66648072	0.0038801	0
CCOC	ENSG00000150347	ARID5B	10:63629165-63630286	0.0038852	0
CCOC	ENSG00000110492	MDK	11:45820224-45821289	0.0038921	0
CCOC	ENSG00000110497	AMBRA1	11:45820224-45821289	0.0038921	0
CCOC	ENSG00000175213	ZNF408	11:45820224-45821289	0.0038921	0
CCOC	ENSG00000181830	SLC35C1	11:45820224-45821289	0.0038921	0
CCOC	ENSG00000138785	INTS12	4:106829913-106832523	0.0039217	0
CCOC	ENSG00000168743	NPNT	4:106829913-106832523	0.0039217	0
CCOC	ENSG00000104960	PTOV1	19:50347107-50348556	0.0039349	0
CCOC	ENSG00000102802	MEDAG	13:31482578-31482809	0.0039724	0
CCOC	ENSG00000175664	TEX26	13:31482578-31482809	0.0039724	0
CCOC	ENSG00000107020	PLGRKT	9:5435709-5439427	0.0039768	0
CCOC	ENSG00000147854	UHRF2	9:5435709-5439427	0.0039768	0
CCOC	ENSG00000197646	PDCD1LG2	9:5435709-5439427	0.0039768	0
CCOC	ENSG00000004975	DVL2	17:8128319-8131169	0.0039922	0
CCOC	ENSG00000129214	SHBG	17:8128319-8131169	0.0039922	0
CCOC	ENSG00000132510	KDM6B	17:8128319-8131169	0.0039922	0
CCOC	ENSG00000141499	WRAP53	17:8128319-8131169	0.0039922	0
CCOC	ENSG00000161956	SENP3	17:8128319-8131169	0.0039922	0
CCOC	ENSG00000161960	EIF4A1	17:8128319-8131169	0.0039922	0
CCOC	ENSG00000161970	RPL26	17:8128319-8131169	0.0039922	0
CCOC	ENSG00000170037	CNTROB	17:8128319-8131169	0.0039922	0
CCOC	ENSG00000170049	KCNAB3	17:8128319-8131169	0.0039922	0
CCOC	ENSG00000174282	ZBTB4	17:8128319-8131169	0.0039922	0
CCOC	ENSG00000178921	PFAS	17:8128319-8131169	0.0039922	0
CCOC	ENSG00000178971	CTC1	17:8128319-8131169	0.0039922	0
CCOC	ENSG00000179094	PER1	17:8128319-8131169	0.0039922	0
CCOC	ENSG00000182224	CYB5D1	17:8128319-8131169	0.0039922	0
CCOC	ENSG00000187838	TMEM256-PLSCR3	17:8128319-8131169	0.0039922	0
CCOC	ENSG00000215041	NEURL4	17:8128319-8131169	0.0039922	0
CCOC	ENSG00000220205	VAMP2	17:8128319-8131169	0.0039922	0
CCOC	ENSG00000176208	ATAD5	17:29133218-29138654	0.0039998	0
CCOC	ENSG00000123064	DDX54	12:113698807-113699220	0.0040197	0
CCOC	ENSG00000106780	MEGF9	9:123378989-123381126	0.0040216	0
CCOC	ENSG00000136861	CDK5RAP2	9:123378989-123381126	0.0040216	0
CCOC	ENSG00000079785	DDX1	2:16124502-16124641	0.0040257	0
CCOC	ENSG00000151779	NBAS	2:16124502-16124641	0.0040257	0
CCOC	ENSG00000099338	CATSPERG	19:38521268-38528838	0.0040394	0
CCOC	ENSG00000120784	ZFP30	19:38521268-38528838	0.0040394	0
CCOC	ENSG00000171747	LGALS4	19:38521268-38528838	0.0040394	0
CCOC	ENSG00000171804	WDR87	19:38521268-38528838	0.0040394	0
CCOC	ENSG00000171817	ZNF540	19:38521268-38528838	0.0040394	0
CCOC	ENSG00000171827	ZNF570	19:38521268-38528838	0.0040394	0
CCOC	ENSG00000179168	GGN	19:38521268-38528838	0.0040394	0
CCOC	ENSG00000181666	HKR1	19:38521268-38528838	0.0040394	0
CCOC	ENSG00000188227	ZNF793	19:38521268-38528838	0.0040394	0
CCOC	ENSG00000188283	ZNF383	19:38521268-38528838	0.0040394	0
CCOC	ENSG00000189144	ZNF573	19:38521268-38528838	0.0040394	0
CCOC	ENSG00000189164	ZNF527	19:38521268-38528838	0.0040394	0
CCOC	ENSG00000196381	ZNF781	19:38521268-38528838	0.0040394	0
CCOC	ENSG00000196437	ZNF569	19:38521268-38528838	0.0040394	0
CCOC	ENSG00000196967	ZNF585A	19:38521268-38528838	0.0040394	0
CCOC	ENSG00000198182	ZNF607	19:38521268-38528838	0.0040394	0
CCOC	ENSG00000245680	ZNF585B	19:38521268-38528838	0.0040394	0
CCOC	ENSG00000088881	EBF4	20:2732445-2733050	0.0040728	0
CCOC	ENSG00000101361	NOP56	20:2732445-2733050	0.0040728	0
CCOC	ENSG00000132635	PCED1A	20:2732445-2733050	0.0040728	0
CCOC	ENSG00000132670	PTPRA	20:2732445-2733050	0.0040728	0
CCOC	ENSG00000198171	DDRGK1	20:2732445-2733050	0.0040728	0
CCOC	ENSG00000198326	TMEM239	20:2732445-2733050	0.0040728	0
CCOC	ENSG00000215305	VPS16	20:2732445-2733050	0.0040728	0
CCOC	ENSG00000258713	C20orf141	20:2732445-2733050	0.0040728	0
CCOC	ENSG00000128512	DOCK4	7:111842295-111848073	0.0040883	0
CCOC	ENSG00000198839	ZNF277	7:111842295-111848073	0.0040883	0
CCOC	ENSG00000104381	GDAP1	8:75262020-75263636	0.004094	0
CCOC	ENSG00000178722	C5orf64	5:60954460-60955819	0.0042427	0
CCOC	ENSG00000160055	TMEM234	1:32680820-32682923	0.0042803	0
CCOC	ENSG00000222046	DCDC2B	1:32680820-32682923	0.0042803	0
CCOC	ENSG00000108771	DHX58	17:41043351-41047964	0.0043095	0
CCOC	ENSG00000126581	BECN1	17:41043351-41047964	0.0043095	0
CCOC	ENSG00000142798	HSPG2	1:22268700-22271525	0.004313	0
CCOC	ENSG00000080007	DDX43	6:74103860-74105194	0.0043227	0
CCOC	ENSG00000135297	MTO1	6:74103860-74105194	0.0043227	0
CCOC	ENSG00000203907	OOEP	6:74103860-74105194	0.0043227	0
CCOC	ENSG00000008324	SS18L2	3:42586014-42587286	0.0043493	0
CCOC	ENSG00000093183	SEC22C	3:42586014-42587286	0.0043493	0
CCOC	ENSG00000114812	VIPR1	3:42586014-42587286	0.0043493	0
CCOC	ENSG00000244607	CCDC13	3:42586014-42587286	0.0043493	0
CCOC	ENSG00000054967	RELT	11:72979241-72986941	0.0044143	0
CCOC	ENSG00000137478	FCHSD2	11:72979241-72986941	0.0044143	0
CCOC	ENSG00000175591	P2RY2	11:72979241-72986941	0.0044143	0
CCOC	ENSG00000087365	SF3B2	11:66205361-66207170	0.0044235	0
CCOC	ENSG00000142186	SCYL1	11:66205361-66207170	0.0044235	0
CCOC	ENSG00000172613	RAD9A	11:66205361-66207170	0.0044235	0
CCOC	ENSG00000172732	MUS81	11:66205361-66207170	0.0044235	0
CCOC	ENSG00000172977	KAT5	11:66205361-66207170	0.0044235	0
CCOC	ENSG00000173039	RELA	11:66205361-66207170	0.0044235	0
CCOC	ENSG00000173120	KDM2A	11:66205361-66207170	0.0044235	0
CCOC	ENSG00000173327	MAP3K11	11:66205361-66207170	0.0044235	0
CCOC	ENSG00000173442	EHBP1L1	11:66205361-66207170	0.0044235	0
CCOC	ENSG00000173933	RBM4	11:66205361-66207170	0.0044235	0
CCOC	ENSG00000174547	MRPL11	11:66205361-66207170	0.0044235	0
CCOC	ENSG00000174744	BRMS1	11:66205361-66207170	0.0044235	0
CCOC	ENSG00000174903	RAB1B	11:66205361-66207170	0.0044235	0
CCOC	ENSG00000175376	EIF1AD	11:66205361-66207170	0.0044235	0
CCOC	ENSG00000175467	SART1	11:66205361-66207170	0.0044235	0
CCOC	ENSG00000175505	CLCF1	11:66205361-66207170	0.0044235	0
CCOC	ENSG00000239306	RBM14	11:66205361-66207170	0.0044235	0
CCOC	ENSG00000108932	SLC16A6	17:66283399-66289595	0.0045037	0
CCOC	ENSG00000108946	PRKAR1A	17:66283399-66289595	0.0045037	0
CCOC	ENSG00000130935	NOL11	17:66283399-66289595	0.0045037	0
CCOC	ENSG00000141337	ARSG	17:66283399-66289595	0.0045037	0
CCOC	ENSG00000154263	ABCA10	17:66283399-66289595	0.0045037	0
CCOC	ENSG00000171634	BPTF	17:66283399-66289595	0.0045037	0
CCOC	ENSG00000196704	AMZ2	17:66283399-66289595	0.0045037	0
CCOC	ENSG00000048649	RSF1	11:76571091-76573634	0.0045078	0
CCOC	ENSG00000078124	ACER3	11:76571091-76573634	0.0045078	0
CCOC	ENSG00000137492	PRKRIR	11:76571091-76573634	0.0045078	0
CCOC	ENSG00000158636	C11orf30	11:76571091-76573634	0.0045078	0
CCOC	ENSG00000138101	DTNB	2:25895066-25897454	0.0045121	0
CCOC	ENSG00000151718	WWC2	4:184017820-184022551	0.0045122	0
CCOC	ENSG00000163814	CDCP1	3:45145005-45148717	0.0045341	0
CCOC	ENSG00000169981	ZNF35	3:45145005-45148717	0.0045341	0
CCOC	ENSG00000178917	ZNF852	3:45145005-45148717	0.0045341	0
CCOC	ENSG00000185219	ZNF445	3:45145005-45148717	0.0045341	0
CCOC	ENSG00000186448	ZNF197	3:45145005-45148717	0.0045341	0
CCOC	ENSG00000196653	ZNF502	3:45145005-45148717	0.0045341	0
CCOC	ENSG00000211456	SACM1L	3:45145005-45148717	0.0045341	0
CCOC	ENSG00000249992	TMEM158	3:45145005-45148717	0.0045341	0
CCOC	ENSG00000114268	PFKFB4	3:48660939-48662550	0.0045433	0
CCOC	ENSG00000114270	COL7A1	3:48660939-48662550	0.0045433	0
CCOC	ENSG00000145040	UCN2	3:48660939-48662550	0.0045433	0
CCOC	ENSG00000164049	FBXW12	3:48660939-48662550	0.0045433	0
CCOC	ENSG00000164053	ATRIP	3:48660939-48662550	0.0045433	0
CCOC	ENSG00000178252	WDR6	3:48660939-48662550	0.0045433	0
CCOC	ENSG00000183396	TMEM89	3:48660939-48662550	0.0045433	0
CCOC	ENSG00000229453	SPINK8	3:48660939-48662550	0.0045433	0
CCOC	ENSG00000157470	FAM81A	15:59747607-59749415	0.0045707	0
CCOC	ENSG00000124782	RREB1	6:7237323-7237370	0.0045828	0
CCOC	ENSG00000144642	RBMS3	3:29372606-29378476	0.0045857	0
CCOC	ENSG00000000419	DPM1	20:49054829-49059838	0.0045985	0
CCOC	ENSG00000101126	ADNP	20:49054829-49059838	0.0045985	0
CCOC	ENSG00000124216	SNAI1	20:49054829-49059838	0.0045985	0
CCOC	ENSG00000172216	CEBPB	20:49054829-49059838	0.0045985	0
CCOC	ENSG00000196396	PTPN1	20:49054829-49059838	0.0045985	0
CCOC	ENSG00000240849	TMEM189	20:49054829-49059838	0.0045985	0
CCOC	ENSG00000146005	PSD2	5:139112715-139114529	0.0046222	0
CCOC	ENSG00000182700	IGIP	5:139112715-139114529	0.0046222	0
CCOC	ENSG00000064692	SNCAIP	5:121646695-121649264	0.004631	0
CCOC	ENSG00000181449	SOX2	3:181412639-181414442	0.0046363	0
CCOC	ENSG00000135862	LAMC1	1:183107417-183109691	0.0046591	0
CCOC	ENSG00000140265	ZSCAN29	15:44484792-44488150	0.0046689	0
CCOC	ENSG00000057657	PRDM1	6:105879786-105881882	0.0046869	0
CCOC	ENSG00000085377	PREP	6:105879786-105881882	0.0046869	0
CCOC	ENSG00000106069	CHN2	7:29602158-29608429	0.0046915	0
CCOC	ENSG00000176532	PRR15	7:29602158-29608429	0.0046915	0
CCOC	ENSG00000096006	CRISP3	6:49732400-49732550	0.0047079	0
CCOC	ENSG00000170950	PGK2	6:49732400-49732550	0.0047079	0
CCOC	ENSG00000007866	TEAD3	6:35691465-35702282	0.0047102	0
CCOC	ENSG00000064995	TAF11	6:35691465-35702282	0.0047102	0
CCOC	ENSG00000065029	ZNF76	6:35691465-35702282	0.0047102	0
CCOC	ENSG00000096060	FKBP5	6:35691465-35702282	0.0047102	0
CCOC	ENSG00000096070	BRPF3	6:35691465-35702282	0.0047102	0
CCOC	ENSG00000112033	PPARD	6:35691465-35702282	0.0047102	0
CCOC	ENSG00000112039	FANCE	6:35691465-35702282	0.0047102	0
CCOC	ENSG00000112062	MAPK14	6:35691465-35702282	0.0047102	0
CCOC	ENSG00000112079	STK38	6:35691465-35702282	0.0047102	0
CCOC	ENSG00000112081	SRSF3	6:35691465-35702282	0.0047102	0
CCOC	ENSG00000157343	ARMC12	6:35691465-35702282	0.0047102	0
CCOC	ENSG00000198755	RPL10A	6:35691465-35702282	0.0047102	0
CCOC	ENSG00000068885	IFT80	3:159546237-159549061	0.0047249	0
CCOC	ENSG00000113810	SMC4	3:159546237-159549061	0.0047249	0
CCOC	ENSG00000151967	SCHIP1	3:159546237-159549061	0.0047249	0
CCOC	ENSG00000168811	IL12A	3:159546237-159549061	0.0047249	0
CCOC	ENSG00000250588	IQCJ-SCHIP1	3:159546237-159549061	0.0047249	0
CCOC	ENSG00000196260	SFTA2	6:31320484-31327452	0.0047379	0
CCOC	ENSG00000204301	NOTCH4	6:31320484-31327452	0.0047379	0
CCOC	ENSG00000244731	C4A	6:31320484-31327452	0.0047379	0
CCOC	ENSG00000261272	MUC22	6:31320484-31327452	0.0047379	0
CCOC	ENSG00000012983	MAP4K5	14:51240640-51243516	0.0047405	0
CCOC	ENSG00000100503	NIN	14:51240640-51243516	0.0047405	0
CCOC	ENSG00000131969	ABHD12B	14:51240640-51243516	0.0047405	0
CCOC	ENSG00000151748	SAV1	14:51240640-51243516	0.0047405	0
CCOC	ENSG00000198513	ATL1	14:51240640-51243516	0.0047405	0
CCOC	ENSG00000144366	GULP1	2:189198220-189198370	0.0047642	0
CCOC	ENSG00000111276	CDKN1B	12:13249396-13256647	0.0047716	0
CCOC	ENSG00000111305	GSG1	12:13249396-13256647	0.0047716	0
CCOC	ENSG00000134531	EMP1	12:13249396-13256647	0.0047716	0
CCOC	ENSG00000069188	SDK2	17:71351903-71354919	0.0047848	0
CCOC	ENSG00000133193	FAM104A	17:71351903-71354919	0.0047848	0
CCOC	ENSG00000141219	C17orf80	17:71351903-71354919	0.0047848	0
CCOC	ENSG00000166685	COG1	17:71351903-71354919	0.0047848	0
CCOC	ENSG00000179604	CDC42EP4	17:71351903-71354919	0.0047848	0
CCOC	ENSG00000157978	LDLRAP1	1:25831691-25832845	0.004798	0
CCOC	ENSG00000157540	DYRK1A	21:38336939-38340102	0.0048229	0
CCOC	ENSG00000159256	MORC3	21:38336939-38340102	0.0048229	0
CCOC	ENSG00000159267	HLCS	21:38336939-38340102	0.0048229	0
CCOC	ENSG00000182670	TTC3	21:38336939-38340102	0.0048229	0
CCOC	ENSG00000185808	PIGP	21:38336939-38340102	0.0048229	0
CCOC	ENSG00000185917	SETD4	21:38336939-38340102	0.0048229	0
CCOC	ENSG00000146006	LRRTM2	5:138280625-138281149	0.0048346	0
CCOC	ENSG00000185760	KCNQ5	6:73795038-73795581	0.0048438	0
CCOC	ENSG00000188389	PDCD1	2:242796063-242797038	0.0049189	0
CCOC	ENSG00000127884	ECHS1	10:135191214-135193544	0.0049224	0
CCOC	ENSG00000148824	MTG1	10:135191214-135193544	0.0049224	0
CCOC	ENSG00000148832	PAOX	10:135191214-135193544	0.0049224	0
CCOC	ENSG00000010278	CD9	12:6201823-6203813	0.0049319	0
CCOC	ENSG00000047617	ANO2	12:6201823-6203813	0.0049319	0
CCOC	ENSG00000089692	LAG3	12:6201823-6203813	0.0049319	0
CCOC	ENSG00000110799	VWF	12:6201823-6203813	0.0049319	0
CCOC	ENSG00000139190	VAMP1	12:6201823-6203813	0.0049319	0
CCOC	ENSG00000110060	PUS3	11:125494268-125497661	0.004952	0
CCOC	ENSG00000120458	MSANTD2	11:125494268-125497661	0.004952	0
CCOC	ENSG00000134910	STT3A	11:125494268-125497661	0.004952	0
CCOC	ENSG00000134940	ACRV1	11:125494268-125497661	0.004952	0
CCOC	ENSG00000149548	CCDC15	11:125494268-125497661	0.004952	0
CCOC	ENSG00000149554	CHEK1	11:125494268-125497661	0.004952	0
CCOC	ENSG00000149557	FEZ1	11:125494268-125497661	0.004952	0
CCOC	ENSG00000150433	TMEM218	11:125494268-125497661	0.004952	0
CCOC	ENSG00000150455	TIRAP	11:125494268-125497661	0.004952	0
CCOC	ENSG00000079616	KIF22	16:30378833-30395872	0.0049546	0
CCOC	ENSG00000102886	GDPD3	16:30378833-30395872	0.0049546	0
CCOC	ENSG00000103496	STX4	16:30378833-30395872	0.0049546	0
CCOC	ENSG00000149925	ALDOA	16:30378833-30395872	0.0049546	0
CCOC	ENSG00000149927	DOC2A	16:30378833-30395872	0.0049546	0
CCOC	ENSG00000156873	PHKG2	16:30378833-30395872	0.0049546	0
CCOC	ENSG00000169955	ZNF747	16:30378833-30395872	0.0049546	0
CCOC	ENSG00000175938	ORAI3	16:30378833-30395872	0.0049546	0
CCOC	ENSG00000111321	LTBR	12:6199880-6200630	0.0049795	0
CCOC	ENSG00000124813	RUNX2	6:45621780-45626253	0.004989	0
CCOC	ENSG00000075420	FNDC3B	3:171712159-171713815	0.0050371	0
CCOC	ENSG00000066468	FGFR2	10:123313276-123313817	0.0050433	0
CCOC	ENSG00000120008	WDR11	10:123313276-123313817	0.0050433	0
CCOC	ENSG00000100528	CNIH1	14:54975918-54977656	0.0050478	0
CCOC	ENSG00000100532	CGRRF1	14:54975918-54977656	0.0050478	0
CCOC	ENSG00000046651	OFD1	X:13117119-13121478	0.005063	0
CCOC	ENSG00000187268	FAM9C	X:13117119-13121478	0.005063	0
CCOC	ENSG00000196664	TLR7	X:13117119-13121478	0.005063	0
CCOC	ENSG00000205542	TMSB4X	X:13117119-13121478	0.005063	0
CCOC	ENSG00000095319	NUP188	9:130827584-130832164	0.0050818	0
CCOC	ENSG00000119392	GLE1	9:130827584-130832164	0.0050818	0
CCOC	ENSG00000136811	ODF2	9:130827584-130832164	0.0050818	0
CCOC	ENSG00000148337	CIZ1	9:130827584-130832164	0.0050818	0
CCOC	ENSG00000148339	SLC25A25	9:130827584-130832164	0.0050818	0
CCOC	ENSG00000171169	NAIF1	9:130827584-130832164	0.0050818	0
CCOC	ENSG00000196152	ZNF79	9:130827584-130832164	0.0050818	0
CCOC	ENSG00000103479	RBL2	16:53085719-53087712	0.0051119	0
CCOC	ENSG00000103494	RPGRIP1L	16:53085719-53087712	0.0051119	0
CCOC	ENSG00000177200	CHD9	16:53085719-53087712	0.0051119	0
CCOC	ENSG00000011376	LARS2	3:45429268-45431494	0.0051679	0
CCOC	ENSG00000144791	LIMD1	3:45429268-45431494	0.0051679	0
CCOC	ENSG00000163820	FYCO1	3:45429268-45431494	0.0051679	0
CCOC	ENSG00000173578	XCR1	3:45429268-45431494	0.0051679	0
CCOC	ENSG00000009413	REV3L	6:111871687-111877634	0.005191	0
CCOC	ENSG00000056972	TRAF3IP2	6:111871687-111877634	0.005191	0
CCOC	ENSG00000173214	KIAA1919	6:111871687-111877634	0.005191	0
CCOC	ENSG00000068400	GRIPAP1	X:48857373-48859664	0.0052148	0
CCOC	ENSG00000068438	FTSJ1	X:48857373-48859664	0.0052148	0
CCOC	ENSG00000101997	CCDC22	X:48857373-48859664	0.0052148	0
CCOC	ENSG00000102007	PLP2	X:48857373-48859664	0.0052148	0
CCOC	ENSG00000102057	KCND1	X:48857373-48859664	0.0052148	0
CCOC	ENSG00000102103	PQBP1	X:48857373-48859664	0.0052148	0
CCOC	ENSG00000102317	RBM3	X:48857373-48859664	0.0052148	0
CCOC	ENSG00000204620	AC115618.1	X:48857373-48859664	0.0052148	0
CCOC	ENSG00000068305	MEF2A	15:99987515-99988940	0.0052725	0
CCOC	ENSG00000166147	FBN1	15:48784026-48787527	0.0053175	0
CCOC	ENSG00000164414	SLC35A1	6:88116918-88118989	0.0053491	0
CCOC	ENSG00000213204	C6orf165	6:88116918-88118989	0.0053491	0
CCOC	ENSG00000150556	LYPD6B	2:149932514-149932714	0.0053524	0
CCOC	ENSG00000114670	NEK11	3:130826507-130829690	0.0053952	0
CCOC	ENSG00000064989	CALCRL	2:188309820-188313669	0.0054018	0
CCOC	ENSG00000071073	MGAT4A	2:99408966-99411422	0.0054544	0
CCOC	ENSG00000196872	KIAA1211L	2:99408966-99411422	0.0054544	0
CCOC	ENSG00000100600	LGMN	14:93212447-93215610	0.0054581	0
CCOC	ENSG00000196628	TCF4	18:53248959-53250627	0.0054666	0
CCOC	ENSG00000100060	MFNG	22:37910396-37910919	0.005507	0
CCOC	ENSG00000100065	CARD10	22:37910396-37910919	0.005507	0
CCOC	ENSG00000033030	ZCCHC8	12:123409420-123412422	0.0055205	0
CCOC	ENSG00000090975	PITPNM2	12:123409420-123412422	0.0055205	0
CCOC	ENSG00000111011	RSRC2	12:123409420-123412422	0.0055205	0
CCOC	ENSG00000111325	OGFOD2	12:123409420-123412422	0.0055205	0
CCOC	ENSG00000111361	EIF2B1	12:123409420-123412422	0.0055205	0
CCOC	ENSG00000111364	DDX55	12:123409420-123412422	0.0055205	0
CCOC	ENSG00000130921	C12orf65	12:123409420-123412422	0.0055205	0
CCOC	ENSG00000139722	VPS37B	12:123409420-123412422	0.0055205	0
CCOC	ENSG00000150967	ABCB9	12:123409420-123412422	0.0055205	0
CCOC	ENSG00000168778	TCTN2	12:123409420-123412422	0.0055205	0
CCOC	ENSG00000182196	ARL6IP4	12:123409420-123412422	0.0055205	0
CCOC	ENSG00000121940	CLCC1	1:110369560-110369710	0.0055284	0
CCOC	ENSG00000087586	AURKA	20:55058362-55059614	0.0055582	0
CCOC	ENSG00000101138	CSTF1	20:55058362-55059614	0.0055582	0
CCOC	ENSG00000124098	FAM210B	20:55058362-55059614	0.0055582	0
CCOC	ENSG00000124103	FAM209A	20:55058362-55059614	0.0055582	0
CCOC	ENSG00000119638	NEK9	14:75591920-75595403	0.0055755	0
CCOC	ENSG00000119640	ACYP1	14:75591920-75595403	0.0055755	0
CCOC	ENSG00000119703	ZC2HC1C	14:75591920-75595403	0.0055755	0
CCOC	ENSG00000119718	EIF2B2	14:75591920-75595403	0.0055755	0
CCOC	ENSG00000072110	ACTN1	14:69390479-69392993	0.0055927	0
CCOC	ENSG00000166396	SERPINB7	18:61533822-61538101	0.0055956	0
CCOC	ENSG00000197632	SERPINB2	18:61533822-61538101	0.0055956	0
CCOC	ENSG00000242550	SERPINB10	18:61533822-61538101	0.0055956	0
CCOC	ENSG00000269113	TRABD2B	1:48359940-48361329	0.0056456	0
CCOC	ENSG00000130598	TNNI2	11:1847023-1857440	0.0057415	0
CCOC	ENSG00000149043	SYT8	11:1847023-1857440	0.0057415	0
CCOC	ENSG00000185940	KRTAP5-5	11:1847023-1857440	0.0057415	0
CCOC	ENSG00000196224	KRTAP5-3	11:1847023-1857440	0.0057415	0
CCOC	ENSG00000010539	ZNF200	16:3549708-3552201	0.0057478	0
CCOC	ENSG00000103343	ZNF174	16:3549708-3552201	0.0057478	0
CCOC	ENSG00000103351	CLUAP1	16:3549708-3552201	0.0057478	0
CCOC	ENSG00000126602	TRAP1	16:3549708-3552201	0.0057478	0
CCOC	ENSG00000140987	ZSCAN32	16:3549708-3552201	0.0057478	0
CCOC	ENSG00000138271	GPR87	3:151021555-151026643	0.0057495	0
CCOC	ENSG00000144893	MED12L	3:151021555-151026643	0.0057495	0
CCOC	ENSG00000152580	IGSF10	3:151021555-151026643	0.0057495	0
CCOC	ENSG00000174944	P2RY14	3:151021555-151026643	0.0057495	0
CCOC	ENSG00000181631	P2RY13	3:151021555-151026643	0.0057495	0
CCOC	ENSG00000111186	WNT5B	12:1720474-1722084	0.0057525	0
CCOC	ENSG00000171823	FBXL14	12:1720474-1722084	0.0057525	0
CCOC	ENSG00000092531	SNAP23	15:42789664-42793945	0.0057614	0
CCOC	ENSG00000103978	TMEM87A	15:42789664-42793945	0.0057614	0
CCOC	ENSG00000137802	MAPKBP1	15:42789664-42793945	0.0057614	0
CCOC	ENSG00000137814	HAUS2	15:42789664-42793945	0.0057614	0
CCOC	ENSG00000137822	TUBGCP4	15:42789664-42793945	0.0057614	0
CCOC	ENSG00000140326	CDAN1	15:42789664-42793945	0.0057614	0
CCOC	ENSG00000168806	LCMT2	15:42789664-42793945	0.0057614	0
CCOC	ENSG00000174197	MGA	15:42789664-42793945	0.0057614	0
CCOC	ENSG00000180979	LRRC57	15:42789664-42793945	0.0057614	0
CCOC	ENSG00000214013	GANC	15:42789664-42793945	0.0057614	0
CCOC	ENSG00000129646	QRICH2	17:74364424-74370039	0.0057926	0
CCOC	ENSG00000161542	PRPSAP1	17:74364424-74370039	0.0057926	0
CCOC	ENSG00000176170	SPHK1	17:74364424-74370039	0.0057926	0
CCOC	ENSG00000184838	PRR16	5:119939384-119942652	0.0057938	0
CCOC	ENSG00000184730	APOBR	16:28536816-28540663	0.0057989	0
CCOC	ENSG00000188603	CLN3	16:28536816-28540663	0.0057989	0
CCOC	ENSG00000197272	IL27	16:28536816-28540663	0.0057989	0
CCOC	ENSG00000233232	NPIPB7	16:28536816-28540663	0.0057989	0
CCOC	ENSG00000114455	HHLA2	3:107771745-107772767	0.0058066	0
CCOC	ENSG00000196776	CD47	3:107771745-107772767	0.0058066	0
CCOC	ENSG00000128881	TTBK2	15:42785633-42789371	0.0058104	0
CCOC	ENSG00000166887	VPS39	15:42785633-42789371	0.0058104	0
CCOC	ENSG00000176953	NFATC2IP	16:28921340-28922681	0.0058206	0
CCOC	ENSG00000177455	CD19	16:28921340-28922681	0.0058206	0
CCOC	ENSG00000177548	RABEP2	16:28921340-28922681	0.0058206	0
CCOC	ENSG00000196296	ATP2A1	16:28921340-28922681	0.0058206	0
CCOC	ENSG00000086102	NFX1	9:32382256-32385599	0.005864	0
CCOC	ENSG00000122692	SMU1	9:32382256-32385599	0.005864	0
CCOC	ENSG00000165264	NDUFB6	9:32382256-32385599	0.005864	0
CCOC	ENSG00000112584	FAM120B	6:169824458-169825650	0.0058648	0
CCOC	ENSG00000130023	ERMARD	6:169824458-169825650	0.0058648	0
CCOC	ENSG00000184465	WDR27	6:169824458-169825650	0.0058648	0
CCOC	ENSG00000184786	TCTE3	6:169824458-169825650	0.0058648	0
CCOC	ENSG00000198951	NAGA	22:43149889-43152429	0.0058663	0
CCOC	ENSG00000055208	TAB2	6:149800591-149807585	0.0058844	0
CCOC	ENSG00000055211	GINM1	6:149800591-149807585	0.0058844	0
CCOC	ENSG00000131013	PPIL4	6:149800591-149807585	0.0058844	0
CCOC	ENSG00000131023	LATS1	6:149800591-149807585	0.0058844	0
CCOC	ENSG00000177688	SUMO4	6:149800591-149807585	0.0058844	0
CCOC	ENSG00000178199	ZC3H12D	6:149800591-149807585	0.0058844	0
CCOC	ENSG00000186625	KATNA1	6:149800591-149807585	0.0058844	0
CCOC	ENSG00000073009	IKBKG	X:154254066-154257797	0.0058852	0
CCOC	ENSG00000102119	EMD	X:154254066-154257797	0.0058852	0
CCOC	ENSG00000126903	SLC10A3	X:154254066-154257797	0.0058852	0
CCOC	ENSG00000130830	MPP1	X:154254066-154257797	0.0058852	0
CCOC	ENSG00000160219	GAB3	X:154254066-154257797	0.0058852	0
CCOC	ENSG00000165775	FUNDC2	X:154254066-154257797	0.0058852	0
CCOC	ENSG00000182712	CMC4	X:154254066-154257797	0.0058852	0
CCOC	ENSG00000185010	F8	X:154254066-154257797	0.0058852	0
CCOC	ENSG00000197932	F8A1	X:154254066-154257797	0.0058852	0
CCOC	ENSG00000198444	F8A2	X:154254066-154257797	0.0058852	0
CCOC	ENSG00000112053	SLC26A8	6:36093947-36102050	0.0059179	0
CCOC	ENSG00000156711	MAPK13	6:36093947-36102050	0.0059179	0
CCOC	ENSG00000116539	ASH1L	1:154598631-154601263	0.005928	0
CCOC	ENSG00000125459	MSTO1	1:154598631-154601263	0.005928	0
CCOC	ENSG00000143515	ATP8B2	1:154598631-154601263	0.005928	0
CCOC	ENSG00000143554	SLC27A3	1:154598631-154601263	0.005928	0
CCOC	ENSG00000143569	UBAP2L	1:154598631-154601263	0.005928	0
CCOC	ENSG00000143578	CREB3L4	1:154598631-154601263	0.005928	0
CCOC	ENSG00000143624	INTS3	1:154598631-154601263	0.005928	0
CCOC	ENSG00000160679	CHTOP	1:154598631-154601263	0.005928	0
CCOC	ENSG00000160688	FLAD1	1:154598631-154601263	0.005928	0
CCOC	ENSG00000160691	SHC1	1:154598631-154601263	0.005928	0
CCOC	ENSG00000160710	ADAR	1:154598631-154601263	0.005928	0
CCOC	ENSG00000160716	CHRNB2	1:154598631-154601263	0.005928	0
CCOC	ENSG00000160741	CRTC2	1:154598631-154601263	0.005928	0
CCOC	ENSG00000160767	FAM189B	1:154598631-154601263	0.005928	0
CCOC	ENSG00000163348	PYGO2	1:154598631-154601263	0.005928	0
CCOC	ENSG00000163463	KRTCAP2	1:154598631-154601263	0.005928	0
CCOC	ENSG00000169231	THBS3	1:154598631-154601263	0.005928	0
CCOC	ENSG00000176444	CLK2	1:154598631-154601263	0.005928	0
CCOC	ENSG00000179085	DPM3	1:154598631-154601263	0.005928	0
CCOC	ENSG00000198837	DENND4B	1:154598631-154601263	0.005928	0
CCOC	ENSG00000122033	MTIF3	13:28014369-28017834	0.0059291	0
CCOC	ENSG00000122034	GTF3A	13:28014369-28017834	0.0059291	0
CCOC	ENSG00000066923	STAG3	7:99738832-99740247	0.0059567	0
CCOC	ENSG00000106290	TAF6	7:99738832-99740247	0.0059567	0
CCOC	ENSG00000160844	GATS	7:99738832-99740247	0.0059567	0
CCOC	ENSG00000166508	MCM7	7:99738832-99740247	0.0059567	0
CCOC	ENSG00000166997	CNPY4	7:99738832-99740247	0.0059567	0
CCOC	ENSG00000188186	LAMTOR4	7:99738832-99740247	0.0059567	0
CCOC	ENSG00000197093	GAL3ST4	7:99738832-99740247	0.0059567	0
CCOC	ENSG00000213413	PVRIG	7:99738832-99740247	0.0059567	0
CCOC	ENSG00000213420	GPC2	7:99738832-99740247	0.0059567	0
CCOC	ENSG00000221838	AP4M1	7:99738832-99740247	0.0059567	0
CCOC	ENSG00000119608	PROX2	14:75749120-75751713	0.0059689	0
CCOC	ENSG00000140044	JDP2	14:75749120-75751713	0.0059689	0
CCOC	ENSG00000170345	FOS	14:75749120-75751713	0.0059689	0
CCOC	ENSG00000170348	TMED10	14:75749120-75751713	0.0059689	0
CCOC	ENSG00000006047	YBX2	17:7182499-7186813	0.006041	0
CCOC	ENSG00000170291	ELP5	17:7182499-7186813	0.006041	0
CCOC	ENSG00000170296	GABARAP	17:7182499-7186813	0.006041	0
CCOC	ENSG00000181856	SLC2A4	17:7182499-7186813	0.006041	0
CCOC	ENSG00000108587	GOSR1	17:29145618-29153982	0.0060477	0
CCOC	ENSG00000126653	NSRP1	17:29145618-29153982	0.0060477	0
CCOC	ENSG00000172171	TEFM	17:29145618-29153982	0.0060477	0
CCOC	ENSG00000196712	NF1	17:29145618-29153982	0.0060477	0
CCOC	ENSG00000105971	CAV2	7:115967187-115969658	0.0060492	0
CCOC	ENSG00000168631	DPCR1	6:31008740-31009478	0.0060815	0
CCOC	ENSG00000204613	TRIM10	6:31008740-31009478	0.0060815	0
CCOC	ENSG00000006652	IFRD1	7:111640715-111642141	0.0061006	0
CCOC	ENSG00000106078	COBL	7:51295013-51298379	0.0061101	0
CCOC	ENSG00000132000	PODNL1	19:14084605-14085705	0.0061459	0
CCOC	ENSG00000132005	RFX1	19:14084605-14085705	0.0061459	0
CCOC	ENSG00000184640	44448	17:75249444-75252703	0.006155	0
CCOC	ENSG00000077585	GPR137B	1:236161014-236165602	0.0061663	0
CCOC	ENSG00000116962	NID1	1:236161014-236165602	0.0061663	0
CCOC	ENSG00000147955	SIGMAR1	9:34636623-34638970	0.0062059	0
CCOC	ENSG00000165282	PIGO	9:34636623-34638970	0.0062059	0
CCOC	ENSG00000205143	ARID3C	9:34636623-34638970	0.0062059	0
CCOC	ENSG00000213930	GALT	9:34636623-34638970	0.0062059	0
CCOC	ENSG00000162878	PKDCC	2:42298693-42302582	0.006222	0
CCOC	ENSG00000205086	C2orf91	2:42298693-42302582	0.006222	0
CCOC	ENSG00000011243	AKAP8L	19:15401811-15406381	0.0062278	0
CCOC	ENSG00000105122	RASAL3	19:15401811-15406381	0.0062278	0
CCOC	ENSG00000105127	AKAP8	19:15401811-15406381	0.0062278	0
CCOC	ENSG00000105131	EPHX3	19:15401811-15406381	0.0062278	0
CCOC	ENSG00000105137	SYDE1	19:15401811-15406381	0.0062278	0
CCOC	ENSG00000141867	BRD4	19:15401811-15406381	0.0062278	0
CCOC	ENSG00000172725	CORO1B	11:66246140-66249487	0.006233	0
CCOC	ENSG00000172830	SSH3	11:66246140-66249487	0.006233	0
CCOC	ENSG00000173465	SSSCA1	11:66246140-66249487	0.006233	0
CCOC	ENSG00000173715	C11orf80	11:66246140-66249487	0.006233	0
CCOC	ENSG00000175634	RPS6KB2	11:66246140-66249487	0.006233	0
CCOC	ENSG00000254986	DPP3	11:66246140-66249487	0.006233	0
CCOC	ENSG00000255038	RP11-1167A19.2	11:66246140-66249487	0.006233	0
CCOC	ENSG00000256349	CTD-3074O7.11	11:66246140-66249487	0.006233	0
CCOC	ENSG00000182446	NPLOC4	17:79608720-79609823	0.0062359	0
CCOC	ENSG00000185298	CCDC137	17:79608720-79609823	0.0062359	0
CCOC	ENSG00000214087	ARL16	17:79608720-79609823	0.0062359	0
CCOC	ENSG00000108406	DHX40	17:57454368-57457069	0.0062482	0
CCOC	ENSG00000175155	YPEL2	17:57454368-57457069	0.0062482	0
CCOC	ENSG00000164106	SCRG1	4:173927179-173927882	0.0063035	0
CCOC	ENSG00000124721	DNAH8	6:38763482-38764268	0.0063125	0
CCOC	ENSG00000124767	GLO1	6:38763482-38764268	0.0063125	0
CCOC	ENSG00000075711	DLG1	3:197119358-197123101	0.0063166	0
CCOC	ENSG00000163960	UBXN7	3:197119358-197123101	0.0063166	0
CCOC	ENSG00000081721	DUSP12	1:161165846-161173873	0.0063535	0
CCOC	ENSG00000132716	DCAF8	1:161165846-161173873	0.0063535	0
CCOC	ENSG00000143258	USP21	1:161165846-161173873	0.0063535	0
CCOC	ENSG00000158793	NIT1	1:161165846-161173873	0.0063535	0
CCOC	ENSG00000158850	B4GALT3	1:161165846-161173873	0.0063535	0
CCOC	ENSG00000158859	ADAMTS4	1:161165846-161173873	0.0063535	0
CCOC	ENSG00000158864	NDUFS2	1:161165846-161173873	0.0063535	0
CCOC	ENSG00000158869	FCER1G	1:161165846-161173873	0.0063535	0
CCOC	ENSG00000158882	TOMM40L	1:161165846-161173873	0.0063535	0
CCOC	ENSG00000248485	PCP4L1	1:161165846-161173873	0.0063535	0
CCOC	ENSG00000158796	DEDD	1:161192783-161199393	0.0063591	0
CCOC	ENSG00000158874	APOA2	1:161192783-161199393	0.0063591	0
CCOC	ENSG00000168036	CTNNB1	3:42060493-42069114	0.0063725	0
CCOC	ENSG00000182983	ZNF662	3:42060493-42069114	0.0063725	0
CCOC	ENSG00000170044	ZPLD1	3:101608416-101609528	0.0063832	0
CCOC	ENSG00000126698	DNAJC8	1:28878414-28880950	0.0063885	0
CCOC	ENSG00000180098	TRNAU1AP	1:28878414-28880950	0.0063885	0
CCOC	ENSG00000180198	RCC1	1:28878414-28880950	0.0063885	0
CCOC	ENSG00000188060	RAB42	1:28878414-28880950	0.0063885	0
CCOC	ENSG00000204138	PHACTR4	1:28878414-28880950	0.0063885	0
CCOC	ENSG00000161551	ZNF577	19:51980321-51984030	0.0064224	0
CCOC	ENSG00000196214	ZNF766	19:51980321-51984030	0.0064224	0
CCOC	ENSG00000197608	ZNF841	19:51980321-51984030	0.0064224	0
CCOC	ENSG00000198093	ZNF649	19:51980321-51984030	0.0064224	0
CCOC	ENSG00000204611	ZNF616	19:51980321-51984030	0.0064224	0
CCOC	ENSG00000213822	CEACAM18	19:51980321-51984030	0.0064224	0
CCOC	ENSG00000254521	SIGLEC12	19:51980321-51984030	0.0064224	0
CCOC	ENSG00000256087	ZNF432	19:51980321-51984030	0.0064224	0
CCOC	ENSG00000078967	UBE2D4	7:43982660-43982890	0.0064306	0
CCOC	ENSG00000106603	COA1	7:43982660-43982890	0.0064306	0
CCOC	ENSG00000106624	AEBP1	7:43982660-43982890	0.0064306	0
CCOC	ENSG00000174485	DENND4A	15:66922237-66924952	0.0064523	0
CCOC	ENSG00000182240	BACE2	21:42607228-42609125	0.0064605	0
CCOC	ENSG00000130309	COLGALT1	19:17676179-17676907	0.0064753	0
CCOC	ENSG00000108961	RANGRF	17:8190990-8193593	0.0064815	0
CCOC	ENSG00000125434	SLC25A35	17:8190990-8193593	0.0064815	0
CCOC	ENSG00000198844	ARHGEF15	17:8190990-8193593	0.0064815	0
CCOC	ENSG00000120262	CCDC170	6:151802535-151804534	0.0065091	0
CCOC	ENSG00000155906	RMND1	6:151802535-151804534	0.0065091	0
CCOC	ENSG00000181472	ZBTB2	6:151802535-151804534	0.0065091	0
CCOC	ENSG00000132256	TRIM5	11:5645086-5648244	0.0065384	0
CCOC	ENSG00000132274	TRIM22	11:5645086-5648244	0.0065384	0
CCOC	ENSG00000167360	OR51Q1	11:5645086-5648244	0.0065384	0
CCOC	ENSG00000180919	OR56B4	11:5645086-5648244	0.0065384	0
CCOC	ENSG00000180934	OR56A1	11:5645086-5648244	0.0065384	0
CCOC	ENSG00000180988	OR52N2	11:5645086-5648244	0.0065384	0
CCOC	ENSG00000181074	OR52N4	11:5645086-5648244	0.0065384	0
CCOC	ENSG00000184478	OR56A3	11:5645086-5648244	0.0065384	0
CCOC	ENSG00000184881	OR51B2	11:5645086-5648244	0.0065384	0
CCOC	ENSG00000196565	HBG2	11:5645086-5648244	0.0065384	0
CCOC	ENSG00000205409	OR52E6	11:5645086-5648244	0.0065384	0
CCOC	ENSG00000258588	TRIM6-TRIM34	11:5645086-5648244	0.0065384	0
CCOC	ENSG00000258659	TRIM34	11:5645086-5648244	0.0065384	0
CCOC	ENSG00000066032	CTNNA2	2:80059114-80060865	0.0065428	0
CCOC	ENSG00000183023	SLC8A1	2:40579488-40580628	0.0065466	0
CCOC	ENSG00000063978	RNF4	4:2331340-2332670	0.0065602	0
CCOC	ENSG00000087269	NOP14	4:2331340-2332670	0.0065602	0
CCOC	ENSG00000109736	MFSD10	4:2331340-2332670	0.0065602	0
CCOC	ENSG00000125386	FAM193A	4:2331340-2332670	0.0065602	0
CCOC	ENSG00000159733	ZFYVE28	4:2331340-2332670	0.0065602	0
CCOC	ENSG00000179979	CRIPAK	4:2331340-2332670	0.0065602	0
CCOC	ENSG00000185049	NELFA	4:2331340-2332670	0.0065602	0
CCOC	ENSG00000214367	HAUS3	4:2331340-2332670	0.0065602	0
CCOC	ENSG00000175866	BAIAP2	17:79040988-79041943	0.0065721	0
CCOC	ENSG00000183048	SLC25A10	17:79040988-79041943	0.0065721	0
CCOC	ENSG00000152086	TUBA3E	2:131046320-131046550	0.0066328	0
CCOC	ENSG00000133818	RRAS2	11:14378745-14381364	0.0066417	0
CCOC	ENSG00000010292	NCAPD2	12:6601532-6605073	0.0066494	0
CCOC	ENSG00000010295	IFFO1	12:6601532-6605073	0.0066494	0
CCOC	ENSG00000111639	MRPL51	12:6601532-6605073	0.0066494	0
CCOC	ENSG00000111640	GAPDH	12:6601532-6605073	0.0066494	0
CCOC	ENSG00000111641	NOP2	12:6601532-6605073	0.0066494	0
CCOC	ENSG00000111642	CHD4	12:6601532-6605073	0.0066494	0
CCOC	ENSG00000111671	SPSB2	12:6601532-6605073	0.0066494	0
CCOC	ENSG00000126746	ZNF384	12:6601532-6605073	0.0066494	0
CCOC	ENSG00000139192	TAPBPL	12:6601532-6605073	0.0066494	0
CCOC	ENSG00000139193	CD27	12:6601532-6605073	0.0066494	0
CCOC	ENSG00000134352	IL6ST	5:55273079-55274672	0.0066526	0
CCOC	ENSG00000164068	RNF123	3:49756183-49757750	0.0066959	0
CCOC	ENSG00000173531	MST1	3:49756183-49757750	0.0066959	0
CCOC	ENSG00000173540	GMPPB	3:49756183-49757750	0.0066959	0
CCOC	ENSG00000176020	AMIGO3	3:49756183-49757750	0.0066959	0
CCOC	ENSG00000185614	FAM212A	3:49756183-49757750	0.0066959	0
CCOC	ENSG00000137642	SORL1	11:121451843-121458678	0.0067105	0
CCOC	ENSG00000116157	GPX7	1:53096976-53105071	0.0067216	0
CCOC	ENSG00000121310	ECHDC2	1:53096976-53105071	0.0067216	0
CCOC	ENSG00000134744	ZCCHC11	1:53096976-53105071	0.0067216	0
CCOC	ENSG00000162385	MAGOH	1:53096976-53105071	0.0067216	0
CCOC	ENSG00000089053	ANAPC5	12:121664241-121668712	0.0067293	0
CCOC	ENSG00000110931	CAMKK2	12:121664241-121668712	0.0067293	0
CCOC	ENSG00000135124	P2RX4	12:121664241-121668712	0.0067293	0
CCOC	ENSG00000149922	TBX6	16:30360360-30362756	0.0067325	0
CCOC	ENSG00000123975	CKS2	9:92032404-92045324	0.0067343	0
CCOC	ENSG00000186354	C9orf47	9:92032404-92045324	0.0067343	0
CCOC	ENSG00000213694	S1PR3	9:92032404-92045324	0.0067343	0
CCOC	ENSG00000099901	RANBP1	22:19934600-19941892	0.0068135	0
CCOC	ENSG00000099910	KLHL22	22:19934600-19941892	0.0068135	0
CCOC	ENSG00000147364	FBXO25	8:356367-358001	0.0068355	0
CCOC	ENSG00000069248	NUP133	1:229099268-229101137	0.006848	0
CCOC	ENSG00000168148	HIST3H3	1:229099268-229101137	0.006848	0
CCOC	ENSG00000163694	RBM47	4:40512442-40519624	0.0068568	0
CCOC	ENSG00000172922	RNASEH2C	11:66485260-66489136	0.0068573	0
CCOC	ENSG00000173898	SPTBN2	11:66485260-66489136	0.0068573	0
CCOC	ENSG00000173992	CCS	11:66485260-66489136	0.0068573	0
CCOC	ENSG00000119596	YLPM1	14:75529568-75531686	0.0068603	0
CCOC	ENSG00000119616	FCF1	14:75529568-75531686	0.0068603	0
CCOC	ENSG00000119630	PGF	14:75529568-75531686	0.0068603	0
CCOC	ENSG00000119684	MLH3	14:75529568-75531686	0.0068603	0
CCOC	ENSG00000182463	TSHZ2	20:51562160-51563428	0.0068888	0
CCOC	ENSG00000118960	HS1BP3	2:20621171-20626033	0.0069231	0
CCOC	ENSG00000143878	RHOB	2:20621171-20626033	0.0069231	0
CCOC	ENSG00000072201	LNX1	4:54600381-54601910	0.0069554	0
CCOC	ENSG00000109220	CHIC2	4:54600381-54601910	0.0069554	0
CCOC	ENSG00000134248	LAMTOR5	1:110932336-110934318	0.0069641	0
CCOC	ENSG00000143125	PROK1	1:110932336-110934318	0.0069641	0
CCOC	ENSG00000168679	SLC16A4	1:110932336-110934318	0.0069641	0
CCOC	ENSG00000103510	KAT8	16:31467708-31472590	0.0069821	0
CCOC	ENSG00000140688	C16orf58	16:31467708-31472590	0.0069821	0
CCOC	ENSG00000140691	ARMC5	16:31467708-31472590	0.0069821	0
CCOC	ENSG00000176723	ZNF843	16:31467708-31472590	0.0069821	0
CCOC	ENSG00000197302	ZNF720	16:31467708-31472590	0.0069821	0
CCOC	ENSG00000003436	TFPI	2:187558200-187560557	0.007029	0
CCOC	ENSG00000138448	ITGAV	2:187558200-187560557	0.007029	0
CCOC	ENSG00000144369	FAM171B	2:187558200-187560557	0.007029	0
CCOC	ENSG00000007047	MARK4	19:45599814-45609495	0.0070406	0
CCOC	ENSG00000104856	RELB	19:45599814-45609495	0.0070406	0
CCOC	ENSG00000104859	CLASRP	19:45599814-45609495	0.0070406	0
CCOC	ENSG00000104866	PPP1R37	19:45599814-45609495	0.0070406	0
CCOC	ENSG00000125740	FOSB	19:45599814-45609495	0.0070406	0
CCOC	ENSG00000142252	GEMIN7	19:45599814-45609495	0.0070406	0
CCOC	ENSG00000170684	ZNF296	19:45599814-45609495	0.0070406	0
CCOC	ENSG00000179846	NKPD1	19:45599814-45609495	0.0070406	0
CCOC	ENSG00000213892	CEACAM16	19:45599814-45609495	0.0070406	0
CCOC	ENSG00000112029	FBXO5	6:153301397-153307055	0.0070828	0
CCOC	ENSG00000112031	MTRF1L	6:153301397-153307055	0.0070828	0
CCOC	ENSG00000104804	TULP2	19:49271762-49278517	0.0070942	0
CCOC	ENSG00000104805	NUCB1	19:49271762-49278517	0.0070942	0
CCOC	ENSG00000104848	KCNA7	19:49271762-49278517	0.0070942	0
CCOC	ENSG00000104901	DKKL1	19:49271762-49278517	0.0070942	0
CCOC	ENSG00000105516	DBP	19:49271762-49278517	0.0070942	0
CCOC	ENSG00000105538	RASIP1	19:49271762-49278517	0.0070942	0
CCOC	ENSG00000105550	FGF21	19:49271762-49278517	0.0070942	0
CCOC	ENSG00000105552	BCAT2	19:49271762-49278517	0.0070942	0
CCOC	ENSG00000126461	SCAF1	19:49271762-49278517	0.0070942	0
CCOC	ENSG00000126464	PRR12	19:49271762-49278517	0.0070942	0
CCOC	ENSG00000142233	NTN5	19:49271762-49278517	0.0070942	0
CCOC	ENSG00000176909	MAMSTR	19:49271762-49278517	0.0070942	0
CCOC	ENSG00000176920	FUT2	19:49271762-49278517	0.0070942	0
CCOC	ENSG00000182264	IZUMO1	19:49271762-49278517	0.0070942	0
CCOC	ENSG00000196337	CGB7	19:49271762-49278517	0.0070942	0
CCOC	ENSG00000225950	NTF4	19:49271762-49278517	0.0070942	0
CCOC	ENSG00000008988	RPS20	8:56683940-56687915	0.0071044	0
CCOC	ENSG00000137574	TGS1	8:56683940-56687915	0.0071044	0
CCOC	ENSG00000167904	TMEM68	8:56683940-56687915	0.0071044	0
CCOC	ENSG00000254087	LYN	8:56683940-56687915	0.0071044	0
CCOC	ENSG00000124486	USP9X	X:40855840-40857353	0.0071055	0
CCOC	ENSG00000183337	BCOR	X:40855840-40857353	0.0071055	0
CCOC	ENSG00000117859	OSBPL9	1:52112747-52116179	0.0071094	0
CCOC	ENSG00000160213	CSTB	21:45202099-45203802	0.0071687	0
CCOC	ENSG00000160214	RRP1	21:45202099-45203802	0.0071687	0
CCOC	ENSG00000031081	ARHGAP31	3:119027945-119031778	0.0071753	0
CCOC	ENSG00000121578	B4GALT4	3:119027945-119031778	0.0071753	0
CCOC	ENSG00000144847	IGSF11	3:119027945-119031778	0.0071753	0
CCOC	ENSG00000145996	CDKAL1	6:20875631-20880267	0.0071952	0
CCOC	ENSG00000100209	HSCB	22:29187500-29189479	0.0072054	0
CCOC	ENSG00000100219	XBP1	22:29187500-29189479	0.0072054	0
CCOC	ENSG00000159873	CCDC117	22:29187500-29189479	0.0072054	0
CCOC	ENSG00000182944	EWSR1	22:29187500-29189479	0.0072054	0
CCOC	ENSG00000183579	ZNRF3	22:29187500-29189479	0.0072054	0
CCOC	ENSG00000183765	CHEK2	22:29187500-29189479	0.0072054	0
CCOC	ENSG00000171067	C11orf24	11:68036466-68042108	0.007207	0
CCOC	ENSG00000152583	SPARCL1	4:88441352-88443959	0.0072094	0
CCOC	ENSG00000152591	DSPP	4:88441352-88443959	0.0072094	0
CCOC	ENSG00000152592	DMP1	4:88441352-88443959	0.0072094	0
CCOC	ENSG00000089154	GCN1L1	12:120739480-120741248	0.0072285	0
CCOC	ENSG00000089157	RPLP0	12:120739480-120741248	0.0072285	0
CCOC	ENSG00000089159	PXN	12:120739480-120741248	0.0072285	0
CCOC	ENSG00000089163	SIRT4	12:120739480-120741248	0.0072285	0
CCOC	ENSG00000111737	RAB35	12:120739480-120741248	0.0072285	0
CCOC	ENSG00000135097	MSI1	12:120739480-120741248	0.0072285	0
CCOC	ENSG00000170890	PLA2G1B	12:120739480-120741248	0.0072285	0
CCOC	ENSG00000182871	COL18A1	21:46805133-46808785	0.0072351	0
CCOC	ENSG00000070614	NDST1	5:149917724-149918641	0.0072371	0
CCOC	ENSG00000070814	TCOF1	5:149917724-149918641	0.0072371	0
CCOC	ENSG00000113716	HMGXB3	5:149917724-149918641	0.0072371	0
CCOC	ENSG00000123358	NR4A1	12:52425638-52428541	0.0072417	0
CCOC	ENSG00000123395	C12orf44	12:52425638-52428541	0.0072417	0
CCOC	ENSG00000135503	ACVR1B	12:52425638-52428541	0.0072417	0
CCOC	ENSG00000161835	GRASP	12:52425638-52428541	0.0072417	0
CCOC	ENSG00000155016	CYP2U1	4:108816382-108819352	0.0072528	0
CCOC	ENSG00000164023	SGMS2	4:108816382-108819352	0.0072528	0
CCOC	ENSG00000060140	STYK1	12:10825972-10827510	0.0072658	0
CCOC	ENSG00000111196	MAGOHB	12:10825972-10827510	0.0072658	0
CCOC	ENSG00000212127	TAS2R14	12:10825972-10827510	0.0072658	0
CCOC	ENSG00000255837	TAS2R20	12:10825972-10827510	0.0072658	0
CCOC	ENSG00000112715	VEGFA	6:43810042-43811490	0.0072668	0
CCOC	ENSG00000124574	ABCC10	6:43810042-43811490	0.0072668	0
CCOC	ENSG00000143621	ILF2	1:154578888-154582992	0.0073076	0
CCOC	ENSG00000160712	IL6R	1:154578888-154582992	0.0073076	0
CCOC	ENSG00000160714	UBE2Q1	1:154578888-154582992	0.0073076	0
CCOC	ENSG00000163346	PBXIP1	1:154578888-154582992	0.0073076	0
CCOC	ENSG00000163354	DCST2	1:154578888-154582992	0.0073076	0
CCOC	ENSG00000163357	DCST1	1:154578888-154582992	0.0073076	0
CCOC	ENSG00000185442	FAM174B	15:93165391-93169994	0.0073485	0
CCOC	ENSG00000066322	ELOVL1	1:43837050-43840376	0.0074137	0
CCOC	ENSG00000117395	EBNA1BP2	1:43837050-43840376	0.0074137	0
CCOC	ENSG00000117400	MPL	1:43837050-43840376	0.0074137	0
CCOC	ENSG00000141959	PFKL	21:45425435-45427766	0.0074191	0
CCOC	ENSG00000160218	TRAPPC10	21:45425435-45427766	0.0074191	0
CCOC	ENSG00000241945	PWP2	21:45425435-45427766	0.0074191	0
CCOC	ENSG00000015479	MATR3	5:138606620-138614850	0.0074208	0
CCOC	ENSG00000120705	ETF1	5:138606620-138614850	0.0074208	0
CCOC	ENSG00000120725	SIL1	5:138606620-138614850	0.0074208	0
CCOC	ENSG00000120733	KDM3B	5:138606620-138614850	0.0074208	0
CCOC	ENSG00000105438	KDELR1	19:48927640-48929027	0.0074438	0
CCOC	ENSG00000105443	CYTH2	19:48927640-48929027	0.0074438	0
CCOC	ENSG00000105447	GRWD1	19:48927640-48929027	0.0074438	0
CCOC	ENSG00000105464	GRIN2D	19:48927640-48929027	0.0074438	0
CCOC	ENSG00000105467	SYNGR4	19:48927640-48929027	0.0074438	0
CCOC	ENSG00000161558	TMEM143	19:48927640-48929027	0.0074438	0
CCOC	ENSG00000182324	KCNJ14	19:48927640-48929027	0.0074438	0
CCOC	ENSG00000109534	GAR1	4:110722217-110724279	0.0074452	0
CCOC	ENSG00000123739	PLA2G12A	4:110722217-110724279	0.0074452	0
CCOC	ENSG00000183423	LRIT3	4:110722217-110724279	0.0074452	0
CCOC	ENSG00000205403	CFI	4:110722217-110724279	0.0074452	0
CCOC	ENSG00000198488	B3GNT6	11:76673067-76675211	0.007467	0
CCOC	ENSG00000051128	HOMER3	19:19513608-19518877	0.0074685	0
CCOC	ENSG00000064490	RFXANK	19:19513608-19518877	0.0074685	0
CCOC	ENSG00000089639	GMIP	19:19513608-19518877	0.0074685	0
CCOC	ENSG00000105726	ATP13A1	19:19513608-19518877	0.0074685	0
CCOC	ENSG00000129933	MAU2	19:19513608-19518877	0.0074685	0
CCOC	ENSG00000184162	NR2C2AP	19:19513608-19518877	0.0074685	0
CCOC	ENSG00000213988	ZNF90	19:19513608-19518877	0.0074685	0
CCOC	ENSG00000213996	TM6SF2	19:19513608-19518877	0.0074685	0
CCOC	ENSG00000250067	YJEFN3	19:19513608-19518877	0.0074685	0
CCOC	ENSG00000137312	FLOT1	6:30784418-30790976	0.007472	0
CCOC	ENSG00000137331	IER3	6:30784418-30790976	0.007472	0
CCOC	ENSG00000137411	VARS2	6:30784418-30790976	0.007472	0
CCOC	ENSG00000146112	PPP1R18	6:30784418-30790976	0.007472	0
CCOC	ENSG00000204580	DDR1	6:30784418-30790976	0.007472	0
CCOC	ENSG00000204592	HLA-E	6:30784418-30790976	0.007472	0
CCOC	ENSG00000204599	TRIM39	6:30784418-30790976	0.007472	0
CCOC	ENSG00000204632	HLA-G	6:30784418-30790976	0.007472	0
CCOC	ENSG00000248167	TRIM39-RPP21	6:30784418-30790976	0.007472	0
CCOC	ENSG00000143498	TAF1A	1:222133541-222136406	0.0074852	0
CCOC	ENSG00000143507	DUSP10	1:222133541-222136406	0.0074852	0
CCOC	ENSG00000154305	MIA3	1:222133541-222136406	0.0074852	0
CCOC	ENSG00000154309	DISP1	1:222133541-222136406	0.0074852	0
CCOC	ENSG00000204539	CDSN	6:31111956-31113191	0.0074919	0
CCOC	ENSG00000204542	C6orf15	6:31111956-31113191	0.0074919	0
CCOC	ENSG00000152127	MGAT5	2:134893988-134896170	0.0075066	0
CCOC	ENSG00000097007	ABL1	9:132499440-132501104	0.0075115	0
CCOC	ENSG00000148344	PTGES	9:132499440-132501104	0.0075115	0
CCOC	ENSG00000132703	APCS	1:159566406-159569121	0.0075145	0
CCOC	ENSG00000158716	DUSP23	1:159566406-159569121	0.0075145	0
CCOC	ENSG00000162723	SLAMF9	1:159566406-159569121	0.0075145	0
CCOC	ENSG00000184155	OR10J5	1:159566406-159569121	0.0075145	0
CCOC	ENSG00000196266	OR10J3	1:159566406-159569121	0.0075145	0
CCOC	ENSG00000156113	KCNMA1	10:79048756-79053008	0.0075154	0
CCOC	ENSG00000100201	DDX17	22:39353108-39355405	0.0075162	0
CCOC	ENSG00000100211	CBY1	22:39353108-39355405	0.0075162	0
CCOC	ENSG00000100242	SUN2	22:39353108-39355405	0.0075162	0
CCOC	ENSG00000100246	DNAL4	22:39353108-39355405	0.0075162	0
CCOC	ENSG00000100324	TAB1	22:39353108-39355405	0.0075162	0
CCOC	ENSG00000128383	APOBEC3A	22:39353108-39355405	0.0075162	0
CCOC	ENSG00000179750	APOBEC3B	22:39353108-39355405	0.0075162	0
CCOC	ENSG00000213923	CSNK1E	22:39353108-39355405	0.0075162	0
CCOC	ENSG00000187672	ERC2	3:55724782-55725400	0.0075458	0
CCOC	ENSG00000159433	STARD9	15:42866660-42868895	0.0075583	0
CCOC	ENSG00000154767	XPC	3:14164049-14169423	0.0075864	0
CCOC	ENSG00000154781	CCDC174	3:14164049-14169423	0.0075864	0
CCOC	ENSG00000163528	CHCHD4	3:14164049-14169423	0.0075864	0
CCOC	ENSG00000170876	TMEM43	3:14164049-14169423	0.0075864	0
CCOC	ENSG00000177463	NR2C2	3:14164049-14169423	0.0075864	0
CCOC	ENSG00000180438	TPRXL	3:14164049-14169423	0.0075864	0
CCOC	ENSG00000268279	RP11-434D12.1	3:14164049-14169423	0.0075864	0
CCOC	ENSG00000141068	KSR1	17:25845805-25849410	0.0075966	0
CCOC	ENSG00000168961	LGALS9	17:25845805-25849410	0.0075966	0
CCOC	ENSG00000108651	UTP6	17:29232417-29234571	0.0075974	0
CCOC	ENSG00000184060	ADAP2	17:29232417-29234571	0.0075974	0
CCOC	ENSG00000107104	KANK1	9:522240-524072	0.0076491	0
CCOC	ENSG00000137090	DMRT1	9:522240-524072	0.0076491	0
CCOC	ENSG00000132603	NIP7	16:69359649-69361943	0.0076798	0
CCOC	ENSG00000132612	VPS4A	16:69359649-69361943	0.0076798	0
CCOC	ENSG00000141076	CIRH1A	16:69359649-69361943	0.0076798	0
CCOC	ENSG00000157315	TMED6	16:69359649-69361943	0.0076798	0
CCOC	ENSG00000168802	CHTF8	16:69359649-69361943	0.0076798	0
CCOC	ENSG00000213380	COG8	16:69359649-69361943	0.0076798	0
CCOC	ENSG00000104375	STK3	8:99895149-99896449	0.0077271	0
CCOC	ENSG00000135316	SYNCRIP	6:86384100-86390585	0.0077699	0
CCOC	ENSG00000112159	MDN1	6:90993403-90996890	0.0078219	0
CCOC	ENSG00000112182	BACH2	6:90993403-90996890	0.0078219	0
CCOC	ENSG00000135341	MAP3K7	6:90993403-90996890	0.0078219	0
CCOC	ENSG00000106100	NOD1	7:30207662-30214073	0.0078298	0
CCOC	ENSG00000180233	ZNRF2	7:30207662-30214073	0.0078298	0
CCOC	ENSG00000180354	MTURN	7:30207662-30214073	0.0078298	0
CCOC	ENSG00000158473	CD1D	1:158788190-158790259	0.0078476	0
CCOC	ENSG00000163563	MNDA	1:158788190-158790259	0.0078476	0
CCOC	ENSG00000163564	PYHIN1	1:158788190-158790259	0.0078476	0
CCOC	ENSG00000163565	IFI16	1:158788190-158790259	0.0078476	0
CCOC	ENSG00000078061	ARAF	X:48333154-48336621	0.0078595	0
CCOC	ENSG00000197779	ZNF81	X:48333154-48336621	0.0078595	0
CCOC	ENSG00000118855	MFSD1	3:158528389-158529457	0.0078623	0
CCOC	ENSG00000188199	NUTM2B	10:81584755-81587961	0.0078629	0
CCOC	ENSG00000228570	NUTM2E	10:81584755-81587961	0.0078629	0
CCOC	ENSG00000152520	PAN3	13:28710995-28717076	0.0078631	0
CCOC	ENSG00000186184	POLR1D	13:28710995-28717076	0.0078631	0
CCOC	ENSG00000114331	ACAP2	3:196043564-196046338	0.0078911	0
CCOC	ENSG00000119231	SENP5	3:196043564-196046338	0.0078911	0
CCOC	ENSG00000145107	TM4SF19	3:196043564-196046338	0.0078911	0
CCOC	ENSG00000161217	PCYT1A	3:196043564-196046338	0.0078911	0
CCOC	ENSG00000163959	SLC51A	3:196043564-196046338	0.0078911	0
CCOC	ENSG00000163961	RNF168	3:196043564-196046338	0.0078911	0
CCOC	ENSG00000213123	TCTEX1D2	3:196043564-196046338	0.0078911	0
CCOC	ENSG00000272741	RP11-447L10.1	3:196043564-196046338	0.0078911	0
CCOC	ENSG00000173638	SLC19A1	21:46931801-46934901	0.0079098	0
CCOC	ENSG00000142166	IFNAR1	21:34732256-34735310	0.0079407	0
CCOC	ENSG00000142188	TMEM50B	21:34732256-34735310	0.0079407	0
CCOC	ENSG00000159086	PAXBP1	21:34732256-34735310	0.0079407	0
CCOC	ENSG00000159110	IFNAR2	21:34732256-34735310	0.0079407	0
CCOC	ENSG00000159128	IFNGR2	21:34732256-34735310	0.0079407	0
CCOC	ENSG00000159131	GART	21:34732256-34735310	0.0079407	0
CCOC	ENSG00000159140	SON	21:34732256-34735310	0.0079407	0
CCOC	ENSG00000159147	DONSON	21:34732256-34735310	0.0079407	0
CCOC	ENSG00000184221	OLIG1	21:34732256-34735310	0.0079407	0
CCOC	ENSG00000243646	IL10RB	21:34732256-34735310	0.0079407	0
CCOC	ENSG00000182168	UNC5C	4:96225458-96226801	0.0079734	0
CCOC	ENSG00000132824	SERINC3	20:43169065-43173529	0.0080369	0
CCOC	ENSG00000095015	MAP3K1	5:55707769-55712790	0.0080445	0
CCOC	ENSG00000163637	PRICKLE2	3:64208883-64212135	0.0080584	0
CCOC	ENSG00000005483	KMT2E	7:104617048-104627846	0.0081363	0
CCOC	ENSG00000135249	RINT1	7:104617048-104627846	0.0081363	0
CCOC	ENSG00000135250	SRPK2	7:104617048-104627846	0.0081363	0
CCOC	ENSG00000146776	ATXN7L1	7:104617048-104627846	0.0081363	0
CCOC	ENSG00000145819	ARHGAP26	5:142583757-142588519	0.0081455	0
CCOC	ENSG00000183808	RBM12B	8:94750774-94754124	0.0081512	0
CCOC	ENSG00000212998	RBM12B-AS1	8:94750774-94754124	0.0081512	0
CCOC	ENSG00000076554	TPD52	8:81402435-81402835	0.008237	0
CCOC	ENSG00000205189	ZBTB10	8:81402435-81402835	0.008237	0
CCOC	ENSG00000120337	TNFSF18	1:172944784-172946742	0.0082507	0
CCOC	ENSG00000152595	MEPE	4:88446012-88452658	0.0082525	0
CCOC	ENSG00000153310	FAM49B	8:131004000-131013646	0.0082528	0
CCOC	ENSG00000089876	DHX32	10:127583400-127586170	0.0082585	0
CCOC	ENSG00000107938	EDRF1	10:127583400-127586170	0.0082585	0
CCOC	ENSG00000107949	BCCIP	10:127583400-127586170	0.0082585	0
CCOC	ENSG00000154485	MMP21	10:127583400-127586170	0.0082585	0
CCOC	ENSG00000175029	CTBP2	10:127583400-127586170	0.0082585	0
CCOC	ENSG00000203780	FANK1	10:127583400-127586170	0.0082585	0
CCOC	ENSG00000092295	TGM1	14:24765194-24767570	0.0082776	0
CCOC	ENSG00000157379	DHRS1	14:24765194-24767570	0.0082776	0
CCOC	ENSG00000133026	MYH10	17:8568615-8569783	0.0082912	0
CCOC	ENSG00000183318	SPDYE4	17:8568615-8569783	0.0082912	0
CCOC	ENSG00000054267	ARID4B	1:236025450-236032449	0.0082973	0
CCOC	ENSG00000116957	TBCE	1:236025450-236032449	0.0082973	0
CCOC	ENSG00000116984	MTR	1:236025450-236032449	0.0082973	0
CCOC	ENSG00000119285	HEATR1	1:236025450-236032449	0.0082973	0
CCOC	ENSG00000143669	LYST	1:236025450-236032449	0.0082973	0
CCOC	ENSG00000102048	ASB9	X:15316400-15317730	0.0082995	0
CCOC	ENSG00000165192	ASB11	X:15316400-15317730	0.0082995	0
CCOC	ENSG00000165195	PIGA	X:15316400-15317730	0.0082995	0
CCOC	ENSG00000163513	TGFBR2	3:30695029-30703639	0.0083088	0
CCOC	ENSG00000133195	SLC39A11	17:70701618-70703161	0.0083268	0
CCOC	ENSG00000023041	ZDHHC6	10:114141584-114151875	0.0083592	0
CCOC	ENSG00000151532	VTI1A	10:114141584-114151875	0.0083592	0
CCOC	ENSG00000197142	ACSL5	10:114141584-114151875	0.0083592	0
CCOC	ENSG00000130449	ZSWIM6	5:60821429-60822201	0.0083647	0
CCOC	ENSG00000044090	CUL7	6:43334832-43338815	0.008366	0
CCOC	ENSG00000124571	XPO5	6:43334832-43338815	0.008366	0
CCOC	ENSG00000137204	SLC22A7	6:43334832-43338815	0.008366	0
CCOC	ENSG00000157593	SLC35B2	6:43334832-43338815	0.008366	0
CCOC	ENSG00000170734	POLH	6:43334832-43338815	0.008366	0
CCOC	ENSG00000171453	POLR1C	6:43334832-43338815	0.008366	0
CCOC	ENSG00000171467	ZNF318	6:43334832-43338815	0.008366	0
CCOC	ENSG00000172432	GTPBP2	6:43334832-43338815	0.008366	0
CCOC	ENSG00000083093	PALB2	16:23651063-23654291	0.0083876	0
CCOC	ENSG00000103365	GGA2	16:23651063-23654291	0.0083876	0
CCOC	ENSG00000122257	RBBP6	16:23651063-23654291	0.0083876	0
CCOC	ENSG00000166847	DCTN5	16:23651063-23654291	0.0083876	0
CCOC	ENSG00000168447	SCNN1B	16:23651063-23654291	0.0083876	0
CCOC	ENSG00000038358	EDC4	16:68502560-68505786	0.008404	0
CCOC	ENSG00000102901	CENPT	16:68502560-68505786	0.008404	0
CCOC	ENSG00000102974	CTCF	16:68502560-68505786	0.008404	0
CCOC	ENSG00000167261	DPEP2	16:68502560-68505786	0.008404	0
CCOC	ENSG00000184939	ZFP90	16:68502560-68505786	0.008404	0
CCOC	ENSG00000085978	ATG16L1	2:235054600-235057138	0.0084191	0
CCOC	ENSG00000085982	USP40	2:235054600-235057138	0.0084191	0
CCOC	ENSG00000188042	ARL4C	2:235054600-235057138	0.0084191	0
CCOC	ENSG00000108924	HLF	17:53359154-53365929	0.0084385	0
CCOC	ENSG00000108960	MMD	17:53359154-53365929	0.0084385	0
CCOC	ENSG00000166260	COX11	17:53359154-53365929	0.0084385	0
CCOC	ENSG00000166263	STXBP4	17:53359154-53365929	0.0084385	0
CCOC	ENSG00000101109	STK4	20:43237130-43240821	0.008468	0
CCOC	ENSG00000124249	KCNK15	20:43237130-43240821	0.008468	0
CCOC	ENSG00000196839	ADA	20:43237130-43240821	0.008468	0
CCOC	ENSG00000127324	TSPAN8	12:71832480-71836071	0.0084768	0
CCOC	ENSG00000139292	LGR5	12:71832480-71836071	0.0084768	0
CCOC	ENSG00000149243	KLHL35	11:75128639-75135281	0.0085046	0
CCOC	ENSG00000149273	RPS3	11:75128639-75135281	0.0085046	0
CCOC	ENSG00000132359	RAP1GAP2	17:2898454-2900850	0.0085222	0
CCOC	ENSG00000133704	IPO8	12:30945043-30950328	0.0085231	0
CCOC	ENSG00000070047	PHRF1	11:1322717-1333373	0.0085234	0
CCOC	ENSG00000078902	TOLLIP	11:1322717-1333373	0.0085234	0
CCOC	ENSG00000174672	BRSK2	11:1322717-1333373	0.0085234	0
CCOC	ENSG00000177042	TMEM80	11:1322717-1333373	0.0085234	0
CCOC	ENSG00000184545	DUSP8	11:1322717-1333373	0.0085234	0
CCOC	ENSG00000214063	TSPAN4	11:1322717-1333373	0.0085234	0
CCOC	ENSG00000082516	GEMIN5	5:154061560-154063836	0.0085952	0
CCOC	ENSG00000155506	LARP1	5:154061560-154063836	0.0085952	0
CCOC	ENSG00000155508	CNOT8	5:154061560-154063836	0.0085952	0
CCOC	ENSG00000112837	TBX18	6:85825564-85829412	0.0086072	0
CCOC	ENSG00000179869	ABCA13	7:48240404-48241228	0.00868	0
CCOC	ENSG00000183696	UPP1	7:48240404-48241228	0.00868	0
CCOC	ENSG00000110042	DTX4	11:58983381-58985901	0.0086962	0
CCOC	ENSG00000110048	OSBP	11:58983381-58985901	0.0086962	0
CCOC	ENSG00000166801	FAM111A	11:58983381-58985901	0.0086962	0
CCOC	ENSG00000166889	PATL1	11:58983381-58985901	0.0086962	0
CCOC	ENSG00000197629	MPEG1	11:58983381-58985901	0.0086962	0
CCOC	ENSG00000001626	CFTR	7:117321789-117324855	0.008714	0
CCOC	ENSG00000077063	CTTNBP2	7:117321789-117324855	0.008714	0
CCOC	ENSG00000092931	MFSD11	17:74439689-74444995	0.0087474	0
CCOC	ENSG00000129673	AANAT	17:74439689-74444995	0.0087474	0
CCOC	ENSG00000132478	UNK	17:74439689-74444995	0.0087474	0
CCOC	ENSG00000161526	SAP30BP	17:74439689-74444995	0.0087474	0
CCOC	ENSG00000161547	SRSF2	17:74439689-74444995	0.0087474	0
CCOC	ENSG00000175931	UBE2O	17:74439689-74444995	0.0087474	0
CCOC	ENSG00000181038	METTL23	17:74439689-74444995	0.0087474	0
CCOC	ENSG00000185262	UBALD2	17:74439689-74444995	0.0087474	0
CCOC	ENSG00000250506	CDK3	17:74439689-74444995	0.0087474	0
CCOC	ENSG00000048707	VPS13D	1:12465329-12468555	0.0087865	0
CCOC	ENSG00000177468	OLIG3	6:137735937-137737470	0.0088156	0
CCOC	ENSG00000116791	CRYZ	1:75195529-75200652	0.0088277	0
CCOC	ENSG00000162623	TYW3	1:75195529-75200652	0.0088277	0
CCOC	ENSG00000123728	RAP2C	X:131252887-131255138	0.0088279	0
CCOC	ENSG00000165694	FRMD7	X:131252887-131255138	0.0088279	0
CCOC	ENSG00000115084	SLC35F5	2:114606269-114607380	0.0088427	0
CCOC	ENSG00000100650	SRSF5	14:70721117-70722590	0.0088604	0
CCOC	ENSG00000100678	SLC8A3	14:70721117-70722590	0.0088604	0
CCOC	ENSG00000133983	COX16	14:70721117-70722590	0.0088604	0
CCOC	ENSG00000134007	ADAM20	14:70721117-70722590	0.0088604	0
CCOC	ENSG00000090432	MUL1	1:20536940-20540032	0.0088605	0
CCOC	ENSG00000158816	VWA5B1	1:20536940-20540032	0.0088605	0
CCOC	ENSG00000162545	CAMK2N1	1:20536940-20540032	0.0088605	0
CCOC	ENSG00000085831	TTC39A	1:51809862-51811632	0.0088666	0
CCOC	ENSG00000160179	ABCG1	21:43638909-43642796	0.0088838	0
CCOC	ENSG00000160181	TFF2	21:43638909-43642796	0.0088838	0
CCOC	ENSG00000173276	ZBTB21	21:43638909-43642796	0.0088838	0
CCOC	ENSG00000177398	UMODL1	21:43638909-43642796	0.0088838	0
CCOC	ENSG00000125247	TMTC4	13:101085267-101087414	0.0088937	0
CCOC	ENSG00000175198	PCCA	13:101085267-101087414	0.0088937	0
CCOC	ENSG00000115194	SLC30A3	2:27543428-27547660	0.0089022	0
CCOC	ENSG00000115204	MPV17	2:27543428-27547660	0.0089022	0
CCOC	ENSG00000115207	GTF3C2	2:27543428-27547660	0.0089022	0
CCOC	ENSG00000138073	PREB	2:27543428-27547660	0.0089022	0
CCOC	ENSG00000138074	SLC5A6	2:27543428-27547660	0.0089022	0
CCOC	ENSG00000138080	EMILIN1	2:27543428-27547660	0.0089022	0
CCOC	ENSG00000163793	DNAJC5G	2:27543428-27547660	0.0089022	0
CCOC	ENSG00000163795	ZNF513	2:27543428-27547660	0.0089022	0
CCOC	ENSG00000091831	ESR1	6:151814046-151816430	0.0089044	0
CCOC	ENSG00000136371	MTHFS	15:80214214-80217156	0.008911	0
CCOC	ENSG00000140379	BCL2A1	15:80214214-80217156	0.008911	0
CCOC	ENSG00000180953	ST20	15:80214214-80217156	0.008911	0
CCOC	ENSG00000259332	ST20-MTHFS	15:80214214-80217156	0.008911	0
CCOC	ENSG00000109689	STIM2	4:26828022-26829200	0.0089114	0
CCOC	ENSG00000088256	GNA11	19:3059440-3064260	0.0089133	0
CCOC	ENSG00000104953	TLE6	19:3059440-3064260	0.0089133	0
CCOC	ENSG00000104964	AES	19:3059440-3064260	0.0089133	0
CCOC	ENSG00000171132	PRKCE	2:45917421-45919030	0.0089348	0
CCOC	ENSG00000013573	DDX11	12:31771215-31774617	0.0089385	0
CCOC	ENSG00000079257	LXN	3:159135808-159137254	0.0089873	0
CCOC	ENSG00000213999	MEF2B	19:19270943-19272086	0.0090063	0
CCOC	ENSG00000178235	SLITRK1	13:84455700-84456769	0.0090209	0
CCOC	ENSG00000100764	PSMC1	14:90722280-90724145	0.0090372	0
CCOC	ENSG00000152315	KCNK13	14:90722280-90724145	0.0090372	0
CCOC	ENSG00000092421	SEMA6A	5:115907398-115913575	0.0090378	0
CCOC	ENSG00000095397	DFNB31	9:117263541-117268562	0.0090636	0
CCOC	ENSG00000157657	ZNF618	9:117263541-117268562	0.0090636	0
CCOC	ENSG00000171530	TBCA	5:77069750-77072969	0.0090897	0
CCOC	ENSG00000171540	OTP	5:77069750-77072969	0.0090897	0
CCOC	ENSG00000107816	LZTS2	10:102772057-102773653	0.0091036	0
CCOC	ENSG00000107819	SFXN3	10:102772057-102773653	0.0091036	0
CCOC	ENSG00000186862	PDZD7	10:102772057-102773653	0.0091036	0
CCOC	ENSG00000087206	UIMC1	5:176777112-176779570	0.0091383	0
CCOC	ENSG00000113194	FAF2	5:176777112-176779570	0.0091383	0
CCOC	ENSG00000113761	ZNF346	5:176777112-176779570	0.0091383	0
CCOC	ENSG00000145916	RMND5B	5:176777112-176779570	0.0091383	0
CCOC	ENSG00000146067	FAM193B	5:176777112-176779570	0.0091383	0
CCOC	ENSG00000165671	NSD1	5:176777112-176779570	0.0091383	0
CCOC	ENSG00000169220	RGS14	5:176777112-176779570	0.0091383	0
CCOC	ENSG00000169223	LMAN2	5:176777112-176779570	0.0091383	0
CCOC	ENSG00000169230	PRELID1	5:176777112-176779570	0.0091383	0
CCOC	ENSG00000049540	ELN	7:73452069-73454196	0.0091489	0
CCOC	ENSG00000006282	SPATA20	17:47751986-47756110	0.0091907	0
CCOC	ENSG00000121067	SPOP	17:47751986-47756110	0.0091907	0
CCOC	ENSG00000121073	SLC35B1	17:47751986-47756110	0.0091907	0
CCOC	ENSG00000154920	EME1	17:47751986-47756110	0.0091907	0
CCOC	ENSG00000159202	UBE2Z	17:47751986-47756110	0.0091907	0
CCOC	ENSG00000167085	PHB	17:47751986-47756110	0.0091907	0
CCOC	ENSG00000100350	FOXRED2	22:36800093-36803444	0.0091998	0
CCOC	ENSG00000069482	GAL	11:68178179-68182654	0.0092202	0
CCOC	ENSG00000110057	UNC93B1	11:68178179-68182654	0.0092202	0
CCOC	ENSG00000110075	PPP6R3	11:68178179-68182654	0.0092202	0
CCOC	ENSG00000162337	LRP5	11:68178179-68182654	0.0092202	0
CCOC	ENSG00000005339	CREBBP	16:4070660-4071960	0.0092259	0
CCOC	ENSG00000089486	CDIP1	16:4070660-4071960	0.0092259	0
CCOC	ENSG00000162104	ADCY9	16:4070660-4071960	0.0092259	0
CCOC	ENSG00000166246	C16orf71	16:4070660-4071960	0.0092259	0
CCOC	ENSG00000099992	TBC1D10A	22:31605432-31609768	0.0092289	0
CCOC	ENSG00000160183	TMPRSS3	21:43721163-43723489	0.0092343	0
CCOC	ENSG00000087111	PIGS	17:26896964-26899698	0.0092516	0
CCOC	ENSG00000167525	PROCA1	17:26896964-26899698	0.0092516	0
CCOC	ENSG00000258472	RP11-192H23.4	17:26896964-26899698	0.0092516	0
CCOC	ENSG00000091128	LAMB4	7:107851207-107853006	0.0092621	0
CCOC	ENSG00000091129	NRCAM	7:107851207-107853006	0.0092621	0
CCOC	ENSG00000166833	NAV2	11:20056205-20059584	0.0092842	0
CCOC	ENSG00000158104	HPD	12:122361080-122364336	0.0093059	0
CCOC	ENSG00000256950	RP11-87C12.2	12:122361080-122364336	0.0093059	0
CCOC	ENSG00000102935	ZNF423	16:49696778-49700296	0.0093234	0
CCOC	ENSG00000111530	CAND1	12:67461508-67464344	0.0093409	0
CCOC	ENSG00000155974	GRIP1	12:67461508-67464344	0.0093409	0
CCOC	ENSG00000166676	TVP23A	16:10917911-10918920	0.0093409	0
CCOC	ENSG00000102900	NUP93	16:57218407-57223043	0.009344	0
CCOC	ENSG00000104419	NDRG1	8:134290275-134291443	0.0093504	0
CCOC	ENSG00000101040	ZMYND8	20:45937215-45939471	0.0093519	0
CCOC	ENSG00000073910	FRY	13:32518279-32521646	0.0094169	0
CCOC	ENSG00000124171	PARD6B	20:49324140-49324290	0.0094423	0
CCOC	ENSG00000124243	BCAS4	20:49324140-49324290	0.0094423	0
CCOC	ENSG00000197705	KLHL14	18:30348072-30352912	0.0095002	0
CCOC	ENSG00000117289	TXNIP	1:145554960-145555818	0.0095668	0
CCOC	ENSG00000131779	PEX11B	1:145554960-145555818	0.0095668	0
CCOC	ENSG00000131788	PIAS3	1:145554960-145555818	0.0095668	0
CCOC	ENSG00000143127	ITGA10	1:145554960-145555818	0.0095668	0
CCOC	ENSG00000168509	HFE2	1:145554960-145555818	0.0095668	0
CCOC	ENSG00000198483	ANKRD35	1:145554960-145555818	0.0095668	0
CCOC	ENSG00000100320	RBFOX2	22:36744418-36785311	0.0095672	0
CCOC	ENSG00000100345	MYH9	22:36744418-36785311	0.0095672	0
CCOC	ENSG00000100348	TXN2	22:36744418-36785311	0.0095672	0
CCOC	ENSG00000100353	EIF3D	22:36744418-36785311	0.0095672	0
CCOC	ENSG00000100360	IFT27	22:36744418-36785311	0.0095672	0
CCOC	ENSG00000100365	NCF4	22:36744418-36785311	0.0095672	0
CCOC	ENSG00000128284	APOL3	22:36744418-36785311	0.0095672	0
CCOC	ENSG00000128335	APOL2	22:36744418-36785311	0.0095672	0
CCOC	ENSG00000180182	MED14	X:40586381-40596597	0.0095836	0
CCOC	ENSG00000185753	CXorf38	X:40586381-40596597	0.0095836	0
CCOC	ENSG00000215301	DDX3X	X:40586381-40596597	0.0095836	0
CCOC	ENSG00000171940	ZNF217	20:52268286-52275845	0.0095939	0
CCOC	ENSG00000170509	HSD17B13	4:88427461-88429535	0.0096017	0
CCOC	ENSG00000198189	HSD17B11	4:88427461-88429535	0.0096017	0
CCOC	ENSG00000108175	ZMIZ1	10:81073110-81075232	0.0096024	0
CCOC	ENSG00000108179	PPIF	10:81073110-81075232	0.0096024	0
CCOC	ENSG00000115457	IGFBP2	2:217554802-217562304	0.0096234	0
CCOC	ENSG00000115461	IGFBP5	2:217554802-217562304	0.0096234	0
CCOC	ENSG00000089041	P2RX7	12:121650656-121657371	0.0096485	0
CCOC	ENSG00000122971	ACADS	12:121650656-121657371	0.0096485	0
CCOC	ENSG00000169902	TPST1	7:65635320-65636410	0.0096615	0
CCOC	ENSG00000196715	VKORC1L1	7:65635320-65636410	0.0096615	0
CCOC	ENSG00000135473	PAN2	12:56708290-56711075	0.0096951	0
CCOC	ENSG00000144785	RP11-977G19.10	12:56708290-56711075	0.0096951	0
CCOC	ENSG00000257727	CNPY2	12:56708290-56711075	0.0096951	0
CCOC	ENSG00000130700	GATA5	20:61045538-61046431	0.0097097	0
CCOC	ENSG00000115138	POMC	2:25451240-25454412	0.0097183	0
CCOC	ENSG00000119772	DNMT3A	2:25451240-25454412	0.0097183	0
CCOC	ENSG00000138031	ADCY3	2:25451240-25454412	0.0097183	0
CCOC	ENSG00000143970	ASXL2	2:25451240-25454412	0.0097183	0
CCOC	ENSG00000198399	ITSN2	2:25451240-25454412	0.0097183	0
CCOC	ENSG00000106952	TNFSF8	9:117540727-117542697	0.009722	0
CCOC	ENSG00000181634	TNFSF15	9:117540727-117542697	0.009722	0
CCOC	ENSG00000115970	THADA	2:43485260-43486357	0.0097256	0
CCOC	ENSG00000152518	ZFP36L2	2:43485260-43486357	0.0097256	0
CCOC	ENSG00000142156	COL6A1	21:47396506-47407678	0.0097401	0
CCOC	ENSG00000160285	LSS	21:47396506-47407678	0.0097401	0
CCOC	ENSG00000160294	MCM3AP	21:47396506-47407678	0.0097401	0
CCOC	ENSG00000160305	DIP2A	21:47396506-47407678	0.0097401	0
CCOC	ENSG00000160307	S100B	21:47396506-47407678	0.0097401	0
CCOC	ENSG00000183570	PCBP3	21:47396506-47407678	0.0097401	0
CCOC	ENSG00000186866	POFUT2	21:47396506-47407678	0.0097401	0
CCOC	ENSG00000092108	SCFD1	14:31697366-31699956	0.0097424	0
CCOC	ENSG00000092148	HECTD1	14:31697366-31699956	0.0097424	0
CCOC	ENSG00000196792	STRN3	14:31697366-31699956	0.0097424	0
CCOC	ENSG00000203546	RP11-176H8.1	14:31697366-31699956	0.0097424	0
CCOC	ENSG00000073584	SMARCE1	17:39702964-39706888	0.0097543	0
CCOC	ENSG00000108784	NAGLU	17:39702964-39706888	0.0097543	0
CCOC	ENSG00000126561	STAT5A	17:39702964-39706888	0.0097543	0
CCOC	ENSG00000131473	ACLY	17:39702964-39706888	0.0097543	0
CCOC	ENSG00000161594	KLHL10	17:39702964-39706888	0.0097543	0
CCOC	ENSG00000171345	KRT19	17:39702964-39706888	0.0097543	0
CCOC	ENSG00000171346	KRT15	17:39702964-39706888	0.0097543	0
CCOC	ENSG00000177469	PTRF	17:39702964-39706888	0.0097543	0
CCOC	ENSG00000186847	KRT14	17:39702964-39706888	0.0097543	0
CCOC	ENSG00000109906	ZBTB16	11:114000449-114008521	0.0097569	0
CCOC	ENSG00000087303	NID2	14:53476690-53479025	0.0097576	0
CCOC	ENSG00000043143	JADE2	5:133838492-133843956	0.0097894	0
CCOC	ENSG00000164615	CAMLG	5:133838492-133843956	0.0097894	0
CCOC	ENSG00000237190	CDKN2AIPNL	5:133838492-133843956	0.0097894	0
CCOC	ENSG00000129521	EGLN3	14:34929879-34932488	0.0098364	0
CCOC	ENSG00000165389	SPTSSA	14:34929879-34932488	0.0098364	0
CCOC	ENSG00000128683	GAD1	2:171679359-171679606	0.009848	0
CCOC	ENSG00000204334	ERICH2	2:171679359-171679606	0.009848	0
CCOC	ENSG00000136986	DERL1	8:123770124-123771616	0.0098574	0
CCOC	ENSG00000156787	TBC1D31	8:123770124-123771616	0.0098574	0
CCOC	ENSG00000178764	ZHX2	8:123770124-123771616	0.0098574	0
CCOC	ENSG00000055130	CUL1	7:148394231-148398875	0.0098882	0
CCOC	ENSG00000170260	ZNF212	7:148394231-148398875	0.0098882	0
CCOC	ENSG00000170265	ZNF282	7:148394231-148398875	0.0098882	0
CCOC	ENSG00000181220	ZNF746	7:148394231-148398875	0.0098882	0
CCOC	ENSG00000196453	ZNF777	7:148394231-148398875	0.0098882	0
CCOC	ENSG00000197024	ZNF398	7:148394231-148398875	0.0098882	0
CCOC	ENSG00000204946	ZNF783	7:148394231-148398875	0.0098882	0
CCOC	ENSG00000170860	LSM3	3:14182010-14190510	0.0098918	0
CCOC	ENSG00000164144	ARFIP1	4:153764315-153765541	0.0098977	0
CCOC	ENSG00000118217	ATF6	1:161066013-161068922	0.0099225	0
CCOC	ENSG00000122218	COPA	1:161066013-161068922	0.0099225	0
CCOC	ENSG00000162736	NCSTN	1:161066013-161068922	0.0099225	0
CCOC	ENSG00000162755	KLHDC9	1:161066013-161068922	0.0099225	0
CCOC	ENSG00000141429	GALNT1	18:32987546-32990362	0.0099254	0
CCOC	ENSG00000186496	ZNF396	18:32987546-32990362	0.0099254	0
CCOC	ENSG00000140391	TSPAN3	15:76487767-76492109	0.0099379	0
CCOC	ENSG00000169752	NRG4	15:76487767-76492109	0.0099379	0
CCOC	ENSG00000114554	PLXNA1	3:126640012-126641132	0.0099696	0
CCOC	ENSG00000159685	CHCHD6	3:126640012-126641132	0.0099696	0
CCOC	ENSG00000182307	C8orf33	8:146282528-146283914	0.010037	0
CCOC	ENSG00000166546	BEAN1	16:66467288-66468530	0.01008	0
CCOC	ENSG00000072958	AP1M1	19:17233341-17238958	0.010119	0
CCOC	ENSG00000099331	MYO9B	19:17233341-17238958	0.010119	0
CCOC	ENSG00000105085	MED26	19:17233341-17238958	0.010119	0
CCOC	ENSG00000131351	HAUS8	19:17233341-17238958	0.010119	0
CCOC	ENSG00000198743	SLC5A3	21:35444485-35448866	0.01015	0
CCOC	ENSG00000243927	MRPS6	21:35444485-35448866	0.01015	0
CCOC	ENSG00000216921	AC131097.4	2:242835966-242836377	0.010151	0
CCOC	ENSG00000066135	KDM4A	1:44113759-44118332	0.010152	0
CCOC	ENSG00000117410	ATP6V0B	1:44113759-44118332	0.010152	0
CCOC	ENSG00000164011	ZNF691	1:44113759-44118332	0.010152	0
CCOC	ENSG00000171960	PPIH	1:44113759-44118332	0.010152	0
CCOC	ENSG00000018510	AGPS	2:178256523-178263764	0.010156	0
CCOC	ENSG00000170144	HNRNPA3	2:178256523-178263764	0.010156	0
CCOC	ENSG00000159337	PLA2G4D	15:42447684-42449302	0.010173	0
CCOC	ENSG00000168907	PLA2G4F	15:42447684-42449302	0.010173	0
CCOC	ENSG00000113448	PDE4D	5:59094396-59096630	0.010199	0
CCOC	ENSG00000145604	SKP2	5:36160284-36162493	0.010217	0
CCOC	ENSG00000164188	RANBP3L	5:36160284-36162493	0.010217	0
CCOC	ENSG00000065534	MYLK	3:123526396-123529732	0.01023	0
CCOC	ENSG00000160145	KALRN	3:123526396-123529732	0.01023	0
CCOC	ENSG00000142173	COL6A2	21:47390071-47395657	0.010242	0
CCOC	ENSG00000160284	SPATC1L	21:47390071-47395657	0.010242	0
CCOC	ENSG00000182362	YBEY	21:47390071-47395657	0.010242	0
CCOC	ENSG00000135334	AKIRIN2	6:88439496-88443285	0.010243	0
CCOC	ENSG00000135336	ORC3	6:88439496-88443285	0.010243	0
CCOC	ENSG00000086848	ALG9	11:111664012-111667759	0.010286	0
CCOC	ENSG00000137713	PPP2R1B	11:111664012-111667759	0.010286	0
CCOC	ENSG00000170145	SIK2	11:111664012-111667759	0.010286	0
CCOC	ENSG00000197580	BCO2	11:111664012-111667759	0.010286	0
CCOC	ENSG00000204381	LAYN	11:111664012-111667759	0.010286	0
CCOC	ENSG00000138771	SHROOM3	4:77701049-77705603	0.010287	0
CCOC	ENSG00000027075	PRKCH	14:61696220-61696370	0.010289	0
CCOC	ENSG00000100625	SIX4	14:61696220-61696370	0.010289	0
CCOC	ENSG00000182107	TMEM30B	14:61696220-61696370	0.010289	0
CCOC	ENSG00000125844	RRBP1	20:17589981-17597010	0.010322	0
CCOC	ENSG00000125868	DSTN	20:17589981-17597010	0.010322	0
CCOC	ENSG00000153317	ASAP1	8:131024828-131029985	0.010351	0
CCOC	ENSG00000163320	CGGBP1	3:88197479-88201127	0.01036	0
CCOC	ENSG00000175105	ZNF654	3:88197479-88201127	0.01036	0
CCOC	ENSG00000179021	C3orf38	3:88197479-88201127	0.01036	0
CCOC	ENSG00000056097	ZFR	5:32240427-32243209	0.010369	0
CCOC	ENSG00000113384	GOLPH3	5:32240427-32243209	0.010369	0
CCOC	ENSG00000150712	MTMR12	5:32240427-32243209	0.010369	0
CCOC	ENSG00000150995	ITPR1	3:4622047-4627084	0.010379	0
CCOC	ENSG00000162869	PPP1R21	2:48337546-48342801	0.010392	0
CCOC	ENSG00000170802	FOXN2	2:48337546-48342801	0.010392	0
CCOC	ENSG00000204764	RANBP17	5:170199399-170201222	0.010395	0
CCOC	ENSG00000116604	MEF2D	1:156442944-156444319	0.0104	0
CCOC	ENSG00000125462	C1orf61	1:156442944-156444319	0.0104	0
CCOC	ENSG00000132677	RHBG	1:156442944-156444319	0.0104	0
CCOC	ENSG00000143314	MRPL24	1:156442944-156444319	0.0104	0
CCOC	ENSG00000143321	HDGF	1:156442944-156444319	0.0104	0
CCOC	ENSG00000163468	CCT3	1:156442944-156444319	0.0104	0
CCOC	ENSG00000142178	SIK1	21:44789635-44790957	0.010432	0
CCOC	ENSG00000142185	TRPM2	21:44789635-44790957	0.010432	0
CCOC	ENSG00000125810	CD93	20:23061113-23069154	0.010437	0
CCOC	ENSG00000125812	GZF1	20:23061113-23069154	0.010437	0
CCOC	ENSG00000178726	THBD	20:23061113-23069154	0.010437	0
CCOC	ENSG00000108352	RAPGEFL1	17:37808045-37810390	0.010455	0
CCOC	ENSG00000161395	PGAP3	17:37808045-37810390	0.010455	0
CCOC	ENSG00000173991	TCAP	17:37808045-37810390	0.010455	0
CCOC	ENSG00000141480	ARRB2	17:4612560-4616666	0.010456	0
CCOC	ENSG00000141497	ZMYND15	17:4612560-4616666	0.010456	0
CCOC	ENSG00000141503	MINK1	17:4612560-4616666	0.010456	0
CCOC	ENSG00000161921	CXCL16	17:4612560-4616666	0.010456	0
CCOC	ENSG00000205710	C17orf107	17:4612560-4616666	0.010456	0
CCOC	ENSG00000188352	FOCAD	9:20980531-20982438	0.010457	0
CCOC	ENSG00000188921	PTPLAD2	9:20980531-20982438	0.010457	0
CCOC	ENSG00000139718	SETD1B	12:121646927-121649521	0.010466	0
CCOC	ENSG00000132130	LHX1	17:35295540-35295790	0.010475	0
CCOC	ENSG00000155096	AZIN1	8:103979362-103980101	0.010538	0
CCOC	ENSG00000155097	ATP6V1C1	8:103979362-103980101	0.010538	0
CCOC	ENSG00000162896	PIGR	1:207112046-207112995	0.010564	0
CCOC	ENSG00000007255	TRAPPC6A	19:45680387-45684086	0.010615	0
CCOC	ENSG00000104983	CCDC61	19:45680387-45684086	0.010615	0
CCOC	ENSG00000125755	SYMPK	19:45680387-45684086	0.010615	0
CCOC	ENSG00000167384	ZNF180	19:45680387-45684086	0.010615	0
CCOC	ENSG00000189114	BLOC1S3	19:45680387-45684086	0.010615	0
CCOC	ENSG00000267545	AC005779.2	19:45680387-45684086	0.010615	0
CCOC	ENSG00000105479	CCDC114	19:48871862-48872870	0.010665	0
CCOC	ENSG00000163762	TM4SF18	3:149165711-149168545	0.010671	0
CCOC	ENSG00000169903	TM4SF4	3:149165711-149168545	0.010671	0
CCOC	ENSG00000169908	TM4SF1	3:149165711-149168545	0.010671	0
CCOC	ENSG00000010704	HFE	6:30522599-30526202	0.010672	0
CCOC	ENSG00000066379	ZNRD1	6:30522599-30526202	0.010672	0
CCOC	ENSG00000204590	GNL1	6:30522599-30526202	0.010672	0
CCOC	ENSG00000234127	TRIM26	6:30522599-30526202	0.010672	0
CCOC	ENSG00000080345	RIF1	2:152144470-152148001	0.010674	0
CCOC	ENSG00000115145	STAM2	2:152144470-152148001	0.010674	0
CCOC	ENSG00000123609	NMI	2:152144470-152148001	0.010674	0
CCOC	ENSG00000123610	TNFAIP6	2:152144470-152148001	0.010674	0
CCOC	ENSG00000184898	RBM43	2:152144470-152148001	0.010674	0
CCOC	ENSG00000135315	KIAA1009	6:85469772-85477508	0.010687	0
CCOC	ENSG00000135317	SNX14	6:85469772-85477508	0.010687	0
CCOC	ENSG00000031823	RANBP3	19:5717056-5721475	0.010693	0
CCOC	ENSG00000088247	KHSRP	19:5717056-5721475	0.010693	0
CCOC	ENSG00000105426	PTPRS	19:5717056-5721475	0.010693	0
CCOC	ENSG00000127663	KDM4B	19:5717056-5721475	0.010693	0
CCOC	ENSG00000130255	RPL36	19:5717056-5721475	0.010693	0
CCOC	ENSG00000141994	DUS3L	19:5717056-5721475	0.010693	0
CCOC	ENSG00000160633	SAFB	19:5717056-5721475	0.010693	0
CCOC	ENSG00000174898	CATSPERD	19:5717056-5721475	0.010693	0
CCOC	ENSG00000187650	VMAC	19:5717056-5721475	0.010693	0
CCOC	ENSG00000196365	LONP1	19:5717056-5721475	0.010693	0
CCOC	ENSG00000054116	TRAPPC3	1:36754664-36755976	0.010718	0
CCOC	ENSG00000054118	THRAP3	1:36754664-36755976	0.010718	0
CCOC	ENSG00000092850	TEKT2	1:36754664-36755976	0.010718	0
CCOC	ENSG00000116863	ADPRHL2	1:36754664-36755976	0.010718	0
[truncated: 102,612 more rows]
