# Supplementary material for: chromMAGMA: regulatory element-centric interrogation of risk variants
Source: Life Sci Alliance. 2022 Jul 1;5(10):e202201446. doi: 10.26508/lsa.202201446 (PMC9251535; doi:10.26508/lsa.202201446)
Supplement: Supplementary file 2 [file LSA-2022-01446_TableS2.xlsx]

## Sheet: ST2
GWAS	Ensembl Gene ID	Gene	Gene Coorindates (hg19)	P-value	Significant
CCOC	ENSG00000108753	HNF1B	17:36046434-36105096	3.98e-08	1
CCOC	ENSG00000185313	SCN10A	3:38738837-38835501	4.93e-06	0
CCOC	ENSG00000115008	IL1A	2:113531492-113542971	6.83e-06	0
CCOC	ENSG00000100150	DEPDC5	22:32149937-32303020	1.54e-05	0
CCOC	ENSG00000170270	C14orf142	14:93669237-93673459	2.22e-05	0
CCOC	ENSG00000117834	SLC5A9	1:48688339-48714316	4.75e-05	0
CCOC	ENSG00000233932	CTXN2	15:48470546-48495951	6.65e-05	0
CCOC	ENSG00000187764	SEMA4D	9:91975706-92112906	0.00013282	0
CCOC	ENSG00000164161	HHIP	4:145567148-145662542	0.00022019	0
CCOC	ENSG00000174032	SLC25A30	13:45960520-45992549	0.00026797	0
CCOC	ENSG00000171872	KLF17	1:44513987-44600812	0.00028702	0
CCOC	ENSG00000117419	ERI3	1:44686742-44821315	0.00029366	0
CCOC	ENSG00000188393	CLEC2A	12:10051272-10084980	0.00029626	0
CCOC	ENSG00000198089	SFI1	22:31892125-32014537	0.00032074	0
CCOC	ENSG00000178028	DMAP1	1:44679104-44686351	0.00032665	0
CCOC	ENSG00000179772	FOXS1	20:30432103-30433420	0.00041782	0
CCOC	ENSG00000184708	EIF4ENIF1	22:31835345-31885936	0.00043552	0
CCOC	ENSG00000103994	ZNF106	15:42705016-42783390	0.00050479	0
CCOC	ENSG00000169241	SLC50A1	1:155107817-155111334	0.000646	0
CCOC	ENSG00000173805	HAP1	17:39878891-39890898	0.00065407	0
CCOC	ENSG00000156113	KCNMA1	10:78629359-79397577	0.00070252	0
CCOC	ENSG00000122223	CD244	1:160799950-160832692	0.00075561	0
CCOC	ENSG00000102934	PLLP	16:57290009-57318584	0.00075789	0
CCOC	ENSG00000169221	TBC1D10B	16:30368422-30381522	0.00076319	0
CCOC	ENSG00000196586	MYO6	6:76458893-76629254	0.00077309	0
CCOC	ENSG00000168509	HFE2	1:145413191-145417545	0.00077547	0
CCOC	ENSG00000119669	IRF2BPL	14:77490886-77495042	0.0007783	0
CCOC	ENSG00000182541	LIMK2	22:31608225-31676066	0.00080094	0
CCOC	ENSG00000213822	CEACAM18	19:51981897-51993859	0.00082637	0
CCOC	ENSG00000168734	PKIG	20:43160422-43247678	0.00086216	0
CCOC	ENSG00000139364	TMEM132B	12:125811162-126146915	0.00088808	0
CCOC	ENSG00000101425	BPI	20:36932552-36965907	0.00089933	0
CCOC	ENSG00000132801	ZSWIM3	20:44486220-44507770	0.00091839	0
CCOC	ENSG00000171174	RBKS	2:28004266-28113223	0.00095351	0
CCOC	ENSG00000196415	PRTN3	19:840985-848175	0.00097809	0
CCOC	ENSG00000162755	KLHDC9	1:161068151-161070138	0.0010126	0
CCOC	ENSG00000159556	ISL2	15:76629065-76634817	0.0010345	0
CCOC	ENSG00000174083	PIK3R6	17:8706055-8770994	0.001057	0
CCOC	ENSG00000203724	C1orf53	1:197871682-197876497	0.0011099	0
CCOC	ENSG00000176170	SPHK1	17:74372742-74383941	0.0011223	0
CCOC	ENSG00000185721	DRG1	22:31795539-31830172	0.0011308	0
CCOC	ENSG00000051596	THOC3	5:175386534-175395318	0.0011659	0
CCOC	ENSG00000100523	DDHD1	14:53503458-53620046	0.0012897	0
CCOC	ENSG00000006611	USH1C	11:17515442-17565963	0.0012926	0
CCOC	ENSG00000185838	GNB1L	22:19775932-19842462	0.0013103	0
CCOC	ENSG00000164649	CDCA7L	7:21940517-21985542	0.0013915	0
CCOC	ENSG00000010256	UQCRC1	3:48636432-48647391	0.0013987	0
CCOC	ENSG00000258588	TRIM6-TRIM34	11:5617865-5665628	0.0014406	0
CCOC	ENSG00000100105	PATZ1	22:31721790-31742249	0.0014463	0
CCOC	ENSG00000168743	NPNT	4:106816588-106892828	0.0014867	0
CCOC	ENSG00000186766	FOXI2	10:129535538-129539450	0.0014962	0
CCOC	ENSG00000140848	CPNE2	16:57126455-57182281	0.0015959	0
CCOC	ENSG00000140691	ARMC5	16:31469010-31478488	0.0016222	0
CCOC	ENSG00000129673	AANAT	17:74449433-74466199	0.0016768	0
CCOC	ENSG00000138942	RNF185	22:31556138-31603005	0.0017528	0
CCOC	ENSG00000018510	AGPS	2:178257471-178408564	0.0018282	0
CCOC	ENSG00000137642	SORL1	11:121322912-121504471	0.0018635	0
CCOC	ENSG00000168653	NDUFS5	1:39491967-39500308	0.0019652	0
CCOC	ENSG00000143256	PFDN2	1:161070346-161087866	0.0020212	0
CCOC	ENSG00000173838	2021-03-10	17:60778675-60885705	0.0020268	0
CCOC	ENSG00000121067	SPOP	17:47676246-47755525	0.0020276	0
CCOC	ENSG00000162366	PDZK1IP1	1:47649261-47655771	0.002088	0
CCOC	ENSG00000174015	SPERT	13:46276446-46288694	0.002148	0
CCOC	ENSG00000125510	OPRL1	20:62711451-62731996	0.0021761	0
CCOC	ENSG00000168917	SLC35G2	3:136537861-136574734	0.0021977	0
CCOC	ENSG00000114270	COL7A1	3:48601506-48632593	0.0022131	0
CCOC	ENSG00000108294	PSMB3	17:36908978-36920484	0.0022632	0
CCOC	ENSG00000186190	BPIFB3	20:31643230-31661434	0.0023537	0
CCOC	ENSG00000078902	TOLLIP	11:1295598-1330892	0.0023577	0
CCOC	ENSG00000134759	ELP2	18:33709837-33754688	0.0023758	0
CCOC	ENSG00000128928	IVD	15:40697686-40728146	0.0023805	0
CCOC	ENSG00000229474	PATL2	15:44957930-44970894	0.0023822	0
CCOC	ENSG00000171631	P2RY6	11:72975550-73009670	0.0024527	0
CCOC	ENSG00000080007	DDX43	6:74104285-74127289	0.0024733	0
CCOC	ENSG00000104133	SPG11	15:44854894-44955876	0.0024852	0
CCOC	ENSG00000125538	IL1B	2:113587337-113594356	0.0025168	0
CCOC	ENSG00000176390	CRLF3	17:29109702-29151778	0.0025202	0
CCOC	ENSG00000178175	ZNF366	5:71738238-71803249	0.0026405	0
CCOC	ENSG00000198162	MAN1A2	1:117910085-118068320	0.0026467	0
CCOC	ENSG00000164188	RANBP3L	5:36247950-36302011	0.0027287	0
CCOC	ENSG00000198563	DDX39B	6:31497996-31510252	0.0028348	0
CCOC	ENSG00000188343	FAM92A1	8:94712480-94741481	0.0028736	0
CCOC	ENSG00000122136	OBP2A	9:138437885-138441815	0.0028981	0
CCOC	ENSG00000112053	SLC26A8	6:35911291-35992413	0.0029048	0
CCOC	ENSG00000168811	IL12A	3:159706623-159713806	0.0029075	0
CCOC	ENSG00000176281	OR4K5	14:20388766-20389737	0.0029415	0
CCOC	ENSG00000205683	DPF3	14:73085561-73360824	0.0029936	0
CCOC	ENSG00000144476	ACKR3	2:237469424-237491001	0.0030435	0
CCOC	ENSG00000064989	CALCRL	2:188206690-188313021	0.0030754	0
CCOC	ENSG00000112273	HDGFL1	6:22569678-22570750	0.0031013	0
CCOC	ENSG00000115540	MOB4	2:198380295-198418423	0.0031721	0
CCOC	ENSG00000085832	EPS15	1:51819935-51985026	0.0031941	0
CCOC	ENSG00000158092	NCK1	3:136581050-136670446	0.0032108	0
CCOC	ENSG00000158859	ADAMTS4	1:161159538-161168845	0.0032259	0
CCOC	ENSG00000204531	POU5F1	6:31132114-31138451	0.0032426	0
CCOC	ENSG00000158286	RNF207	1:6266189-6281359	0.0032508	0
CCOC	ENSG00000197272	IL27	16:28510683-28518155	0.0032838	0
CCOC	ENSG00000204511	MCCD1	6:31496739-31498008	0.0032969	0
CCOC	ENSG00000056487	PHF21B	22:45277042-45405809	0.0033175	0
CCOC	ENSG00000100078	PLA2G3	22:31530793-31536469	0.0033405	0
CCOC	ENSG00000108439	PNPO	17:46018889-46026674	0.003351	0
CCOC	ENSG00000122729	ACO1	9:32384601-32450834	0.003439	0
CCOC	ENSG00000110987	BCL7A	12:122459861-122499950	0.0034727	0
CCOC	ENSG00000091009	RBM27	5:145583113-145668786	0.0034753	0
CCOC	ENSG00000152583	SPARCL1	4:88394483-88450798	0.003534	0
CCOC	ENSG00000234745	HLA-B	6:31321649-31324989	0.0035414	0
CCOC	ENSG00000118181	RPS25	11:118886422-118889057	0.0036383	0
CCOC	ENSG00000270757	HSPE1-MOB4	2:198364721-198418423	0.0037346	0
CCOC	ENSG00000175931	UBE2O	17:74385613-74449288	0.0037468	0
CCOC	ENSG00000148688	RPP30	10:92631709-92668312	0.0037608	0
CCOC	ENSG00000142538	PTH2	19:49925671-49926698	0.0037759	0
CCOC	ENSG00000133112	TPT1	13:45911005-45915505	0.0037801	0
CCOC	ENSG00000101473	ACOT8	20:44470360-44486048	0.0038084	0
CCOC	ENSG00000197165	SULT1A2	16:28603264-28611058	0.003818	0
CCOC	ENSG00000146374	RSPO3	6:127439844-127520626	0.0038396	0
CCOC	ENSG00000133706	LARS	5:145492589-145562294	0.0039255	0
CCOC	ENSG00000089163	SIRT4	12:120730002-120751045	0.0039501	0
CCOC	ENSG00000138448	ITGAV	2:187454058-187545629	0.003984	0
CCOC	ENSG00000153012	LGI2	4:25000471-25032414	0.0040507	0
CCOC	ENSG00000086619	ERO1LB	1:236378422-236445339	0.0040974	0
CCOC	ENSG00000197111	PCBP2	12:53845886-53874946	0.0041552	0
CCOC	ENSG00000239886	KRTAP9-2	17:39382900-39383904	0.0042126	0
CCOC	ENSG00000180316	PNPLA1	6:36210945-36276372	0.004296	0
CCOC	ENSG00000088298	EDEM2	20:33703160-33735161	0.0043837	0
CCOC	ENSG00000175110	MRPS22	3:139062861-139075888	0.0044188	0
CCOC	ENSG00000144369	FAM171B	2:187558789-187630686	0.0044293	0
CCOC	ENSG00000133937	GSC	14:95234560-95236499	0.0044876	0
CCOC	ENSG00000181074	OR52N4	11:5757228-5777162	0.0045114	0
CCOC	ENSG00000078124	ACER3	11:76571917-76734850	0.0045371	0
CCOC	ENSG00000162620	LRRIQ3	1:74491699-74663871	0.004542	0
CCOC	ENSG00000225614	ZNF469	16:88493879-88507165	0.0045455	0
CCOC	ENSG00000028203	VEZT	12:95611522-95696566	0.0045711	0
CCOC	ENSG00000180035	ZNF48	16:30389633-30411429	0.0045834	0
CCOC	ENSG00000122140	MRPS2	9:138392477-138396519	0.0045929	0
CCOC	ENSG00000197467	COL13A1	10:71561644-71718904	0.0046305	0
CCOC	ENSG00000213949	ITGA1	5:52084136-52249485	0.0046856	0
CCOC	ENSG00000115524	SF3B1	2:198256698-198299815	0.0047366	0
CCOC	ENSG00000134910	STT3A	11:125462690-125492654	0.0048019	0
CCOC	ENSG00000188340	OR6N2	1:158746472-158747425	0.0048697	0
CCOC	ENSG00000161267	BDH1	3:197236654-197300194	0.0049007	0
CCOC	ENSG00000130811	EIF3G	19:10225690-10230599	0.0049632	0
CCOC	ENSG00000079557	AFM	4:74347462-74369718	0.0050237	0
CCOC	ENSG00000176532	PRR15	7:29603039-29606911	0.0050336	0
CCOC	ENSG00000196502	SULT1A1	16:28616908-28634907	0.0051176	0
CCOC	ENSG00000173261	PLAC8L1	5:145463876-145483946	0.0051405	0
CCOC	ENSG00000234545	FAM133B	7:92190072-92219706	0.0051456	0
CCOC	ENSG00000103351	CLUAP1	16:3550945-3589048	0.0051935	0
CCOC	ENSG00000113621	TXNDC15	5:134209427-134237323	0.0051993	0
CCOC	ENSG00000136504	KAT7	17:47865922-47906458	0.0052078	0
CCOC	ENSG00000115520	COQ10B	2:198318231-198339851	0.0052287	0
CCOC	ENSG00000182606	TRAK1	3:42055294-42267382	0.0052752	0
CCOC	ENSG00000170890	PLA2G1B	12:120759914-120765592	0.0052881	0
CCOC	ENSG00000164600	NEUROD6	7:31377075-31380538	0.0053534	0
CCOC	ENSG00000204140	CLPSL1	6:35748831-35755841	0.0053584	0
CCOC	ENSG00000243130	PSG11	19:43511809-43530658	0.0053703	0
CCOC	ENSG00000183808	RBM12B	8:94742798-94753268	0.0053882	0
CCOC	ENSG00000163217	BMP10	2:69092613-69098649	0.0054021	0
CCOC	ENSG00000093010	COMT	22:19929263-19957498	0.0054106	0
CCOC	ENSG00000119950	MXI1	10:111967288-112047123	0.0054229	0
CCOC	ENSG00000089818	NECAP1	12:8234807-8250373	0.0054235	0
CCOC	ENSG00000130561	SAG	2:234216309-234255701	0.0055398	0
CCOC	ENSG00000182183	FAM159A	1:53098961-53133252	0.0055818	0
CCOC	ENSG00000243147	MRPL33	2:27994584-28002608	0.0055961	0
CCOC	ENSG00000131943	C19orf12	19:30189793-30206696	0.0055987	0
CCOC	ENSG00000141194	OR4D1	17:56232515-56233447	0.0056978	0
CCOC	ENSG00000077279	DCX	X:110537007-110655460	0.0056989	0
CCOC	ENSG00000137574	TGS1	8:56685791-56738007	0.005699	0
CCOC	ENSG00000213886	UBD	6:29523389-29527702	0.0057	0
CCOC	ENSG00000162543	UBXN10	1:20512578-20522540	0.00574	0
CCOC	ENSG00000166091	CMTM5	14:23846017-23848981	0.0058083	0
CCOC	ENSG00000170348	TMED10	14:75598171-75643349	0.0058179	0
CCOC	ENSG00000138796	HADH	4:108910870-108956331	0.0058402	0
CCOC	ENSG00000160710	ADAR	1:154554533-154600456	0.0058436	0
CCOC	ENSG00000176208	ATAD5	17:29159020-29222295	0.0059231	0
CCOC	ENSG00000163631	ALB	4:74269972-74287129	0.0059644	0
CCOC	ENSG00000197601	FAR1	11:13690206-13753893	0.0060116	0
CCOC	ENSG00000149418	ST14	11:130029682-130080257	0.0061047	0
CCOC	ENSG00000198839	ZNF277	7:111846643-111983989	0.006194	0
CCOC	ENSG00000189114	BLOC1S3	19:45682003-45685058	0.0062714	0
CCOC	ENSG00000180263	FGD6	12:95470525-95611240	0.0063978	0
CCOC	ENSG00000121236	TRIM6	11:5617331-5634188	0.0064295	0
CCOC	ENSG00000123473	STIL	1:47715811-47779819	0.006435	0
CCOC	ENSG00000128683	GAD1	2:171673200-171717661	0.0065155	0
CCOC	ENSG00000119640	ACYP1	14:75519924-75536181	0.0065499	0
CCOC	ENSG00000198466	ZNF587	19:58331011-58379953	0.0065983	0
CCOC	ENSG00000188092	GPR89B	1:147400506-147465753	0.0066117	0
CCOC	ENSG00000184752	NDUFA12	12:95365104-95397489	0.0066154	0
CCOC	ENSG00000186908	ZDHHC17	12:77157854-77247481	0.0066253	0
CCOC	ENSG00000008324	SS18L2	3:42623332-42636490	0.0066287	0
CCOC	ENSG00000167904	TMEM68	8:56651317-56685955	0.0066291	0
CCOC	ENSG00000170382	LRRN2	1:204586298-204654597	0.0066707	0
CCOC	ENSG00000042304	C2orf83	2:228474806-228498036	0.0067395	0
CCOC	ENSG00000116350	SRSF4	1:29474250-29508637	0.0067954	0
CCOC	ENSG00000243207	PPAN-P2RY11	19:10216899-10226065	0.0068201	0
CCOC	ENSG00000204525	HLA-C	6:31236526-31239913	0.0068579	0
CCOC	ENSG00000078814	MYH7B	20:33543704-33590240	0.0068749	0
CCOC	ENSG00000150712	MTMR12	5:32227111-32313114	0.0069025	0
CCOC	ENSG00000149554	CHEK1	11:125495031-125546150	0.0069475	0
CCOC	ENSG00000182175	RGMA	15:93586636-93632443	0.0069809	0
CCOC	ENSG00000127324	TSPAN8	12:71518877-71551779	0.0070549	0
CCOC	ENSG00000168288	MMADHC	2:150426147-150444330	0.0070914	0
CCOC	ENSG00000134363	FST	5:52776183-52782964	0.0071445	0
CCOC	ENSG00000131080	EDA2R	X:65815479-65859140	0.0071473	0
CCOC	ENSG00000069020	MAST4	5:65892176-66465426	0.0071575	0
CCOC	ENSG00000187082	DEFB106B	8:7340026-7343909	0.0072096	0
CCOC	ENSG00000089250	NOS1	12:117645921-117799607	0.0072249	0
CCOC	ENSG00000114315	HES1	3:193853931-193856401	0.0072685	0
CCOC	ENSG00000135312	HTR1B	6:78171948-78173120	0.007283	0
CCOC	ENSG00000179709	NLRP8	19:56459198-56499995	0.0072886	0
CCOC	ENSG00000184465	WDR27	6:169857303-170102159	0.0073235	0
CCOC	ENSG00000096093	EFHC1	6:52284994-52360583	0.0073327	0
CCOC	ENSG00000178033	FAM26E	6:116832808-116839709	0.0073401	0
CCOC	ENSG00000058729	RIOK2	5:96496571-96519005	0.0074667	0
CCOC	ENSG00000178591	DEFB125	20:68351-77296	0.0074945	0
CCOC	ENSG00000105550	FGF21	19:49258816-49261587	0.0075608	0
CCOC	ENSG00000144827	ABHD10	3:111697723-111712215	0.0075763	0
CCOC	ENSG00000171291	ZNF439	19:11959541-11980306	0.00758	0
CCOC	ENSG00000164532	TBX20	7:35242042-35293711	0.0075934	0
CCOC	ENSG00000123569	H2BFWT	X:103265719-103268259	0.0076255	0
CCOC	ENSG00000135443	KRT85	12:52753790-52761309	0.0076519	0
CCOC	ENSG00000148655	C10orf11	10:77191217-78317133	0.0076883	0
CCOC	ENSG00000168488	ATXN2L	16:28834369-28848558	0.007703	0
CCOC	ENSG00000167565	SERTAD3	19:40946748-40950282	0.0077271	0
CCOC	ENSG00000140323	DISP2	15:40650434-40663256	0.0077465	0
CCOC	ENSG00000170860	LSM3	3:14220228-14239869	0.0077638	0
CCOC	ENSG00000244165	P2RY11	19:10222197-10226065	0.007784	0
CCOC	ENSG00000147955	SIGMAR1	9:34634719-34637805	0.0078544	0
CCOC	ENSG00000164916	FOXK1	7:4721930-4811074	0.0078854	0
CCOC	ENSG00000184560	C17orf74	17:7328851-7330887	0.0079334	0
CCOC	ENSG00000204681	GABBR1	6:29570005-29600962	0.0079703	0
CCOC	ENSG00000077585	GPR137B	1:236305832-236415314	0.0080436	0
CCOC	ENSG00000174564	IL20RB	3:136676707-136729927	0.0080918	0
CCOC	ENSG00000145832	SLC25A48	5:135170365-135224326	0.008125	0
CCOC	ENSG00000109534	GAR1	4:110736666-110745893	0.0081511	0
CCOC	ENSG00000147669	POLR2K	8:101162839-101166230	0.0082003	0
CCOC	ENSG00000108961	RANGRF	17:8191745-8193409	0.0082108	0
CCOC	ENSG00000173626	TRAPPC3L	6:116817646-116866773	0.0082161	0
CCOC	ENSG00000106384	MOGAT3	7:100839010-100844302	0.0082624	0
CCOC	ENSG00000162374	ELAVL4	1:50513686-50669442	0.0082695	0
CCOC	ENSG00000132570	PCBD2	5:134240810-134298336	0.008298	0
CCOC	ENSG00000183423	LRIT3	4:110769340-110793471	0.0083024	0
CCOC	ENSG00000131068	DEFB118	20:29956421-29961726	0.0083041	0
CCOC	ENSG00000149090	PAMR1	11:35453374-35551848	0.00832	0
CCOC	ENSG00000180209	MYLPF	16:30386123-30389310	0.0083353	0
CCOC	ENSG00000180988	OR52N2	11:5825018-5842572	0.0083686	0
CCOC	ENSG00000204022	LIPJ	10:90346519-90366733	0.008483	0
CCOC	ENSG00000186306	OR10T2	1:158368312-158369256	0.0085002	0
CCOC	ENSG00000111058	ACSS3	12:81471797-81650538	0.0085226	0
CCOC	ENSG00000111077	TENC1	12:53440810-53458163	0.0085381	0
CCOC	ENSG00000183580	FBXL7	5:15500305-15939905	0.0085573	0
CCOC	ENSG00000093183	SEC22C	3:42589459-42642572	0.0086268	0
CCOC	ENSG00000204538	PSORS1C2	6:31105311-31107127	0.0086346	0
CCOC	ENSG00000100764	PSMC1	14:90722894-90738969	0.0088138	0
CCOC	ENSG00000152749	GPR180	13:95254104-95286899	0.0088159	0
CCOC	ENSG00000157212	PAXIP1	7:154735400-154794682	0.0088352	0
CCOC	ENSG00000132017	DCAF15	19:14063319-14072256	0.0088799	0
CCOC	ENSG00000124788	ATXN1	6:16299343-16761721	0.0088859	0
CCOC	ENSG00000169047	IRS1	2:227596033-227664545	0.0089169	0
CCOC	ENSG00000181001	OR52N1	11:5809084-5810046	0.0089648	0
CCOC	ENSG00000176720	BOK	2:242498146-242513553	0.0089835	0
CCOC	ENSG00000083642	PDS5B	13:33160564-33352158	0.0090735	0
CCOC	ENSG00000171530	TBCA	5:76986995-77072185	0.0090832	0
CCOC	ENSG00000146085	MUT	6:49398073-49431041	0.0090916	0
CCOC	ENSG00000181009	OR52N5	11:5798864-5799897	0.0091239	0
CCOC	ENSG00000188389	PDCD1	2:242792033-242801058	0.0091253	0
CCOC	ENSG00000166575	TMEM135	11:86748886-87039876	0.009133	0
CCOC	ENSG00000174227	PIGG	4:492989-533320	0.0091877	0
CCOC	ENSG00000135569	TAAR5	6:132909731-132910877	0.0092041	0
CCOC	ENSG00000164659	KIAA1324L	7:86506222-86689014	0.0092175	0
CCOC	ENSG00000170876	TMEM43	3:14166440-14185180	0.0093251	0
CCOC	ENSG00000134061	CD180	5:66477205-66492617	0.0094255	0
CCOC	ENSG00000132256	TRIM5	11:5676740-5706339	0.009435	0
CCOC	ENSG00000112029	FBXO5	6:153291658-153304740	0.0094391	0
CCOC	ENSG00000179213	SIGLECL1	19:51754332-51772582	0.0094923	0
CCOC	ENSG00000135925	WNT10A	2:219745255-219758651	0.0095038	0
CCOC	ENSG00000112041	TULP1	6:35465651-35480715	0.0095222	0
CCOC	ENSG00000131748	STARD3	17:37793333-37820454	0.009577	0
CCOC	ENSG00000080298	RFX3	9:3218297-3525992	0.0096606	0
CCOC	ENSG00000167748	KLK1	19:51322402-51327043	0.0097355	0
CCOC	ENSG00000023697	DERA	12:16064186-16190315	0.0097382	0
CCOC	ENSG00000169359	SLC33A1	3:155544300-155572248	0.0097453	0
CCOC	ENSG00000177042	TMEM80	11:695591-705028	0.009749	0
CCOC	ENSG00000125462	C1orf61	1:156374048-156426441	0.0097642	0
CCOC	ENSG00000176920	FUT2	19:49199228-49209191	0.0097645	0
CCOC	ENSG00000146122	DAAM2	6:39760159-39872653	0.009846	0
CCOC	ENSG00000164362	TERT	5:1253282-1295178	0.0099385	0
CCOC	ENSG00000174720	LARP7	4:113558120-113578748	0.010016	0
CCOC	ENSG00000164440	TXLNB	6:139561198-139645148	0.010067	0
CCOC	ENSG00000181856	SLC2A4	17:7184986-7191367	0.010107	0
CCOC	ENSG00000177476	OR2G3	1:247768888-247769817	0.010163	0
CCOC	ENSG00000114861	FOXP1	3:71003865-71633140	0.010196	0
CCOC	ENSG00000105619	TFPT	19:54610320-54619055	0.010289	0
CCOC	ENSG00000136379	ABHD17C	15:80987635-81047962	0.010349	0
CCOC	ENSG00000116641	DOCK7	1:62920397-63154039	0.010471	0
CCOC	ENSG00000153233	PTPRR	12:71031853-71314584	0.0105	0
CCOC	ENSG00000135222	CSN2	4:70820974-70826726	0.01051	0
CCOC	ENSG00000138166	DUSP5	10:112257625-112271302	0.010515	0
CCOC	ENSG00000185482	STAC3	12:57637241-57644971	0.010522	0
CCOC	ENSG00000138795	LEF1	4:108968701-109090112	0.010526	0
CCOC	ENSG00000188647	PTAR1	9:72324438-72374916	0.010535	0
CCOC	ENSG00000185236	RAB11B	19:8455205-8469318	0.010568	0
CCOC	ENSG00000170049	KCNAB3	17:7825177-7833180	0.010582	0
CCOC	ENSG00000162944	RFTN2	2:198435524-198540774	0.010606	0
CCOC	ENSG00000146574	CCZ1B	7:6838566-6865926	0.010659	0
CCOC	ENSG00000138821	SLC39A8	4:103172198-103266655	0.010706	0
CCOC	ENSG00000141506	PIK3R5	17:8782233-8869029	0.010754	0
CCOC	ENSG00000179846	NKPD1	19:45653008-45663408	0.0108	0
CCOC	ENSG00000132274	TRIM22	11:5710817-5732093	0.010808	0
CCOC	ENSG00000164073	MFSD8	4:128838960-128887185	0.010815	0
CCOC	ENSG00000064601	CTSA	20:44519591-44527459	0.010826	0
CCOC	ENSG00000198081	ZBTB14	18:5289018-5297052	0.010874	0
CCOC	ENSG00000111639	MRPL51	12:6601316-6602471	0.010906	0
CCOC	ENSG00000151532	VTI1A	10:114206756-114578503	0.010927	0
CCOC	ENSG00000125912	NCLN	19:3185875-3209573	0.010973	0
CCOC	ENSG00000178585	CTNNBIP1	1:9908334-9970316	0.01098	0
CCOC	ENSG00000204536	CCHCR1	6:31110216-31126015	0.011	0
CCOC	ENSG00000119638	NEK9	14:75548818-75593778	0.011111	0
CCOC	ENSG00000088451	TGDS	13:95226308-95248511	0.011193	0
CCOC	ENSG00000094755	GABRP	5:170210723-170241051	0.011193	0
CCOC	ENSG00000139144	PIK3C2G	12:18395912-18801352	0.011241	0
CCOC	ENSG00000164822	DEFA6	8:6782216-6783598	0.011308	0
CCOC	ENSG00000162878	PKDCC	2:42275161-42285668	0.011313	0
CCOC	ENSG00000137814	HAUS2	15:42841011-42862192	0.011328	0
CCOC	ENSG00000172171	TEFM	17:29226001-29233286	0.011357	0
CCOC	ENSG00000204590	GNL1	6:30509154-30525371	0.011453	0
CCOC	ENSG00000119523	ALG2	9:101978707-101984246	0.011566	0
CCOC	ENSG00000055483	USP36	17:76783463-76836980	0.011609	0
CCOC	ENSG00000112031	MTRF1L	6:153308400-153323925	0.011634	0
CCOC	ENSG00000170759	KIF5B	10:32297938-32345371	0.011649	0
CCOC	ENSG00000122033	MTIF3	13:28009776-28024739	0.011699	0
CCOC	ENSG00000135124	P2RX4	12:121647664-121671909	0.011756	0
CCOC	ENSG00000136193	SCRN1	7:29959719-30029905	0.011826	0
CCOC	ENSG00000134352	IL6ST	5:55230923-55290821	0.01183	0
CCOC	ENSG00000141391	SLMO1	18:12407895-12432237	0.011871	0
CCOC	ENSG00000144583	2021-03-04	2:217122585-217236750	0.011926	0
CCOC	ENSG00000110801	PSMD9	12:122326637-122355771	0.012051	0
CCOC	ENSG00000119953	SMNDC1	10:112052798-112064707	0.012052	0
CCOC	ENSG00000142794	NBPF3	1:21766583-21811393	0.012053	0
CCOC	ENSG00000117859	OSBPL9	1:52082546-52254891	0.012068	0
CCOC	ENSG00000173566	NUDT18	8:21964383-21966932	0.01208	0
CCOC	ENSG00000028116	VRK2	2:58273777-58387055	0.012112	0
CCOC	ENSG00000180902	D2HGDH	2:242674030-242708231	0.012178	0
CCOC	ENSG00000171295	ZNF440	19:11925099-11946016	0.012204	0
CCOC	ENSG00000254901	MEF2BNB	19:19287713-19303400	0.012206	0
CCOC	ENSG00000249992	TMEM158	3:45265956-45267814	0.012371	0
CCOC	ENSG00000214226	C17orf67	17:54869274-54911256	0.012388	0
CCOC	ENSG00000076258	FMO4	1:171283318-171311223	0.012398	0
CCOC	ENSG00000204315	FKBPL	6:32096484-32098067	0.0124	0
CCOC	ENSG00000089902	RCOR1	14:103058996-103196913	0.012489	0
CCOC	ENSG00000141293	SKAP1	17:46210802-46507596	0.012517	0
CCOC	ENSG00000118260	CREB1	2:208394616-208470284	0.012563	0
CCOC	ENSG00000164542	KIAA0895	7:36363759-36429734	0.012565	0
CCOC	ENSG00000006327	TNFRSF12A	16:3070313-3072384	0.012636	0
CCOC	ENSG00000124356	STAMBP	2:74056043-74100783	0.012656	0
CCOC	ENSG00000157379	DHRS1	14:24759804-24769039	0.012685	0
CCOC	ENSG00000058600	POLR3E	16:22308696-22346424	0.01273	0
CCOC	ENSG00000172775	FAM192A	16:57186378-57220387	0.012845	0
CCOC	ENSG00000204592	HLA-E	6:30457183-30461982	0.012908	0
CCOC	ENSG00000114857	NKTR	3:42642147-42690233	0.012944	0
CCOC	ENSG00000151778	SERP2	13:44947978-44971850	0.013127	0
CCOC	ENSG00000171487	NLRP5	19:56511092-56573176	0.013132	0
CCOC	ENSG00000269343	ZNF587B	19:58341427-58357606	0.013145	0
CCOC	ENSG00000165264	NDUFB6	9:32553524-32573182	0.01315	0
CCOC	ENSG00000204923	FBXO48	2:68689498-68694448	0.013169	0
CCOC	ENSG00000153002	CPB1	3:148508917-148577979	0.013191	0
CCOC	ENSG00000092531	SNAP23	15:42783442-42825259	0.013228	0
CCOC	ENSG00000171533	MAP6	11:75297959-75379479	0.013302	0
CCOC	ENSG00000108423	TUBD1	17:57936840-57970306	0.013317	0
CCOC	ENSG00000175745	NR2F1	5:92919043-92930319	0.01335	0
CCOC	ENSG00000177548	RABEP2	16:28915742-28937339	0.013419	0
CCOC	ENSG00000102021	LUZP4	X:114524292-114542121	0.013454	0
CCOC	ENSG00000149021	SCGB1A1	11:62186507-62190678	0.013473	0
CCOC	ENSG00000173077	2021-12-01	9:117904097-118164923	0.013476	0
CCOC	ENSG00000198129	DEFB107B	8:7353368-7366833	0.013548	0
CCOC	ENSG00000168612	ZSWIM1	20:44509581-44513905	0.013592	0
CCOC	ENSG00000170144	HNRNPA3	2:178076063-178088687	0.013603	0
CCOC	ENSG00000204544	MUC21	6:30951485-30957675	0.013698	0
CCOC	ENSG00000106952	TNFSF8	9:117655623-117692875	0.01373	0
CCOC	ENSG00000166897	ELFN2	22:37764000-37823505	0.013824	0
CCOC	ENSG00000179294	C17orf96	17:36827956-36831187	0.013828	0
CCOC	ENSG00000162368	CMPK1	1:47799469-47844511	0.013849	0
CCOC	ENSG00000163530	DPPA2	3:109012635-109035364	0.013852	0
CCOC	ENSG00000125844	RRBP1	20:17594323-17662934	0.013939	0
CCOC	ENSG00000172260	NEGR1	1:71868625-72748533	0.013969	0
CCOC	ENSG00000176476	CCDC101	16:28565249-28603111	0.013989	0
CCOC	ENSG00000244588	RAD21L1	20:1206707-1235988	0.014054	0
CCOC	ENSG00000164074	C4orf29	4:128886411-128957478	0.014073	0
CCOC	ENSG00000105894	PTN	7:136912088-137028606	0.014105	0
CCOC	ENSG00000134940	ACRV1	11:125542229-125550809	0.014172	0
CCOC	ENSG00000181656	GPR88	1:101003728-101007583	0.014176	0
CCOC	ENSG00000031691	CENPQ	6:49431054-49460820	0.014187	0
CCOC	ENSG00000180245	RRH	4:110749150-110765863	0.01425	0
CCOC	ENSG00000153721	CNKSR3	6:154726433-154831753	0.014258	0
CCOC	ENSG00000162004	CCDC78	16:772582-776880	0.01428	0
CCOC	ENSG00000157343	ARMC12	6:35701567-35716690	0.014309	0
CCOC	ENSG00000157502	MUM1L1	X:105412298-105452949	0.014592	0
CCOC	ENSG00000104381	GDAP1	8:75262618-75279345	0.014622	0
CCOC	ENSG00000242950	ERVW-1	7:92097694-92107229	0.014638	0
CCOC	ENSG00000205403	CFI	4:110661848-110723381	0.014747	0
CCOC	ENSG00000172197	MBOAT1	6:20099915-20212695	0.014773	0
CCOC	ENSG00000126768	TIMM17B	X:48750730-48755489	0.014791	0
CCOC	ENSG00000134590	FAM127A	X:134166333-134167576	0.01487	0
CCOC	ENSG00000164651	SP8	7:20821894-20826508	0.014879	0
CCOC	ENSG00000130749	ZC3H4	19:47567444-47617009	0.014952	0
CCOC	ENSG00000102103	PQBP1	X:48755160-48760422	0.014976	0
CCOC	ENSG00000270898	ASB3	2:53897117-54014146	0.015027	0
CCOC	ENSG00000115207	GTF3C2	2:27548716-27580243	0.01505	0
CCOC	ENSG00000137251	TINAG	6:54173203-54254950	0.015083	0
CCOC	ENSG00000088881	EBF4	20:2673524-2740754	0.015158	0
CCOC	ENSG00000152422	XRCC4	5:82373317-82649579	0.015219	0
CCOC	ENSG00000144959	NCEH1	3:172348435-172429207	0.015238	0
CCOC	ENSG00000003436	TFPI	2:188328957-188419219	0.015319	0
CCOC	ENSG00000189325	C6orf222	6:36283534-36304662	0.015355	0
CCOC	ENSG00000172020	GAP43	3:115342151-115440334	0.015385	0
CCOC	ENSG00000130751	NPAS1	19:47523077-47549033	0.015393	0
CCOC	ENSG00000105583	WDR83OS	19:12778881-12780465	0.015421	0
CCOC	ENSG00000104447	TRPS1	8:116420724-116713299	0.015425	0
CCOC	ENSG00000196844	PATE2	11:125646025-125648714	0.015469	0
CCOC	ENSG00000241852	C8orf58	8:22457114-22461663	0.015521	0
CCOC	ENSG00000171877	FRMD5	15:44162962-44487429	0.015538	0
CCOC	ENSG00000196584	XRCC2	7:152343583-152373250	0.015606	0
CCOC	ENSG00000075643	MOCOS	18:33767480-33848685	0.015655	0
CCOC	ENSG00000069248	NUP133	1:229577044-229644088	0.015685	0
CCOC	ENSG00000185880	TRIM69	15:45028314-45060027	0.015793	0
CCOC	ENSG00000069345	DNAJA2	16:46989274-47007625	0.015934	0
CCOC	ENSG00000125434	SLC25A35	17:8191082-8198709	0.015942	0
CCOC	ENSG00000114346	ECT2	3:172468425-172539264	0.015973	0
CCOC	ENSG00000122034	GTF3A	13:27998681-28009846	0.015994	0
CCOC	ENSG00000164070	HSPA4L	4:128703453-128755228	0.016096	0
CCOC	ENSG00000172350	ABCG4	11:119019750-119033375	0.016145	0
CCOC	ENSG00000159212	CLIC6	21:36041612-36090525	0.016223	0
CCOC	ENSG00000033627	ATP6V0A1	17:40610862-40674597	0.016254	0
CCOC	ENSG00000170037	CNTROB	17:7835442-7853237	0.016264	0
CCOC	ENSG00000110955	ATP5B	12:57031959-57039852	0.016351	0
CCOC	ENSG00000188624	IGFL3	19:46623328-46627931	0.016355	0
CCOC	ENSG00000131848	ZSCAN5A	19:56732672-56826208	0.016363	0
CCOC	ENSG00000104866	PPP1R37	19:45596431-45650543	0.016368	0
CCOC	ENSG00000184898	RBM43	2:152104728-152118389	0.0164	0
CCOC	ENSG00000167604	NFKBID	19:36378854-36393205	0.016463	0
CCOC	ENSG00000148832	PAOX	10:135192741-135205198	0.016482	0
CCOC	ENSG00000243943	ZNF512	2:27805836-27846082	0.016531	0
CCOC	ENSG00000179965	ZNF771	16:30418735-30429916	0.016596	0
CCOC	ENSG00000105708	ZNF14	19:19821281-19843921	0.016627	0
CCOC	ENSG00000078053	AMPH	7:38423297-38671167	0.016677	0
CCOC	ENSG00000130810	PPAN	19:10216899-10221975	0.01673	0
CCOC	ENSG00000151623	NR3C2	4:148999915-149365850	0.016749	0
CCOC	ENSG00000254685	FPGT	1:74663896-74674533	0.016807	0
CCOC	ENSG00000159579	RSPRY1	16:57220026-57274385	0.016814	0
CCOC	ENSG00000135297	MTO1	6:74171454-74211179	0.016982	0
CCOC	ENSG00000188060	RAB42	1:28918712-28921098	0.017093	0
CCOC	ENSG00000175183	CSRP2	12:77252495-77272814	0.017097	0
CCOC	ENSG00000053438	NNAT	20:36149607-36152092	0.017178	0
CCOC	ENSG00000100983	GSS	20:33516236-33543794	0.017186	0
CCOC	ENSG00000173809	TDRD12	19:33210679-33281714	0.017217	0
CCOC	ENSG00000173285	OR10K1	1:158435352-158436293	0.017287	0
CCOC	ENSG00000159140	SON	21:34915344-34949820	0.017292	0
CCOC	ENSG00000222004	C7orf71	7:26677490-26686924	0.017333	0
CCOC	ENSG00000119715	ESRRB	14:76837690-76968182	0.017363	0
CCOC	ENSG00000119703	ZC2HC1C	14:75535935-75544799	0.017376	0
CCOC	ENSG00000130713	EXOSC2	9:133569158-133580452	0.017383	0
CCOC	ENSG00000106341	PPP1R17	7:31726631-31748069	0.017444	0
CCOC	ENSG00000197965	MPZL1	1:167691187-167761156	0.017476	0
CCOC	ENSG00000184432	COPB2	3:139076433-139108522	0.017495	0
CCOC	ENSG00000127980	PEX1	7:92116337-92157845	0.017515	0
CCOC	ENSG00000153933	DGKE	17:54911460-54946036	0.017569	0
CCOC	ENSG00000089876	DHX32	10:127524909-127569884	0.017601	0
CCOC	ENSG00000255837	TAS2R20	12:11148561-11150474	0.017612	0
CCOC	ENSG00000181786	ACTL9	19:8807751-8809172	0.017639	0
CCOC	ENSG00000092096	SLC22A17	14:23815520-23822380	0.017664	0
CCOC	ENSG00000186073	C15orf41	15:36871812-37102449	0.017709	0
CCOC	ENSG00000204516	MICB	6:31462054-31478901	0.017808	0
CCOC	ENSG00000086827	ZW10	11:113603905-113644485	0.017825	0
CCOC	ENSG00000110448	CD5	11:60869930-60895324	0.017871	0
CCOC	ENSG00000185955	C7orf61	7:100054238-100062063	0.017893	0
CCOC	ENSG00000177752	YIPF7	4:44624354-44653658	0.017946	0
CCOC	ENSG00000179021	C3orf38	3:88198875-88207115	0.01799	0
CCOC	ENSG00000159267	HLCS	21:38123189-38362545	0.018002	0
CCOC	ENSG00000112837	TBX18	6:85442214-85473954	0.018071	0
CCOC	ENSG00000169252	ADRB2	5:148206156-148254628	0.018081	0
CCOC	ENSG00000123728	RAP2C	X:131337052-131353508	0.018292	0
CCOC	ENSG00000122741	DCAF10	9:37800551-37867666	0.018316	0
CCOC	ENSG00000135862	LAMC1	1:182992572-183114727	0.018331	0
CCOC	ENSG00000106701	FSD1L	9:108210077-108314714	0.018345	0
CCOC	ENSG00000196228	SULT1C3	2:108863651-108881807	0.018347	0
CCOC	ENSG00000144381	HSPD1	2:198351308-198364998	0.018348	0
CCOC	ENSG00000089195	TRMT6	20:5918479-5931204	0.018423	0
CCOC	ENSG00000132000	PODNL1	19:14042000-14064204	0.018442	0
CCOC	ENSG00000106302	HYAL4	7:123485220-123517532	0.018455	0
CCOC	ENSG00000163637	PRICKLE2	3:64079526-64253859	0.018605	0
CCOC	ENSG00000178952	TUFM	16:28853732-28857729	0.01861	0
CCOC	ENSG00000105771	SMG9	19:44232851-44259142	0.018629	0
CCOC	ENSG00000056097	ZFR	5:32354456-32444844	0.018642	0
CCOC	ENSG00000088882	CPXM1	20:2774715-2781292	0.018669	0
CCOC	ENSG00000049656	CLPTM1L	5:1317869-1345180	0.018814	0
CCOC	ENSG00000149564	ESAM	11:124623019-124632223	0.018871	0
CCOC	ENSG00000153165	RGPD3	2:107021136-107084801	0.018945	0
CCOC	ENSG00000130299	GTPBP3	19:17445735-17453540	0.018953	0
CCOC	ENSG00000117971	CHRNB4	15:78916636-78933587	0.018998	0
CCOC	ENSG00000168487	BMP1	8:22022653-22069839	0.019018	0
CCOC	ENSG00000166913	YWHAB	20:43514240-43537173	0.019033	0
CCOC	ENSG00000205542	TMSB4X	X:12993226-12995346	0.019045	0
CCOC	ENSG00000186795	KCNK18	10:118957000-118969810	0.019126	0
CCOC	ENSG00000110244	APOA4	11:116691418-116694011	0.019258	0
CCOC	ENSG00000272573	MUSTN1	3:52867131-52869235	0.019312	0
CCOC	ENSG00000186166	CCDC84	11:118868843-118886455	0.019337	0
CCOC	ENSG00000136826	KLF4	9:110247133-110252047	0.019342	0
CCOC	ENSG00000115392	FANCL	2:58386378-58468515	0.019377	0
CCOC	ENSG00000010932	FMO1	1:171217610-171255113	0.019446	0
CCOC	ENSG00000152767	FARP1	13:98794893-99102023	0.019468	0
CCOC	ENSG00000119684	MLH3	14:75480467-75518235	0.019486	0
CCOC	ENSG00000167258	CDK12	17:37617739-37721398	0.019511	0
CCOC	ENSG00000165304	MELK	9:36572859-36677680	0.01952	0
CCOC	ENSG00000153898	MCOLN2	1:85391266-85462796	0.019546	0
CCOC	ENSG00000152969	JAKMIP1	4:6026661-6202318	0.019585	0
CCOC	ENSG00000137100	DCTN3	9:34613542-34620520	0.019602	0
CCOC	ENSG00000101251	SEL1L2	20:13829635-13975979	0.019606	0
CCOC	ENSG00000080345	RIF1	2:152266397-152333860	0.01963	0
CCOC	ENSG00000184210	DGAT2L6	X:69397336-69425553	0.019642	0
CCOC	ENSG00000158864	NDUFS2	1:161167209-161184185	0.01969	0
CCOC	ENSG00000149231	CCDC82	11:96085929-96123083	0.019742	0
CCOC	ENSG00000115884	SDC1	2:20400558-20425194	0.019796	0
CCOC	ENSG00000178386	ZNF223	19:44556164-44572142	0.019796	0
CCOC	ENSG00000167703	SLC43A2	17:1477678-1532130	0.019848	0
CCOC	ENSG00000253313	C1orf210	1:43747554-43751334	0.019946	0
CCOC	ENSG00000064201	TSPAN32	11:2323195-2339430	0.020087	0
CCOC	ENSG00000197893	NRAP	10:115348583-115423829	0.020121	0
CCOC	ENSG00000073331	ALPK1	4:113218480-113363774	0.020253	0
CCOC	ENSG00000149968	MMP3	11:102706528-102714342	0.02026	0
CCOC	ENSG00000042493	CAPG	2:85621871-85641197	0.020283	0
CCOC	ENSG00000104450	SPAG1	8:101170263-101254132	0.020301	0
CCOC	ENSG00000186493	C5orf38	5:2752058-2755511	0.020337	0
CCOC	ENSG00000178235	SLITRK1	13:84451340-84456528	0.020338	0
CCOC	ENSG00000115998	C2orf42	2:70377017-70418151	0.020346	0
CCOC	ENSG00000100714	MTHFD1	14:64854754-64926725	0.020402	0
CCOC	ENSG00000160201	U2AF1	21:44513066-44527716	0.020448	0
CCOC	ENSG00000170291	ELP5	17:7155372-7163259	0.020592	0
CCOC	ENSG00000100036	SLC35E4	22:31031793-31043862	0.020667	0
CCOC	ENSG00000076382	SPAG5	17:26904583-26926056	0.020688	0
CCOC	ENSG00000188282	RUFY4	2:218899657-218955304	0.020695	0
CCOC	ENSG00000196208	GREB1	2:11674242-11782914	0.020708	0
CCOC	ENSG00000261272	MUC22	6:30973729-31003179	0.020793	0
CCOC	ENSG00000204084	INPP5B	1:38326369-38412729	0.020806	0
CCOC	ENSG00000122224	LY9	1:160765864-160798045	0.020949	0
CCOC	ENSG00000162623	TYW3	1:75198836-75232361	0.020961	0
CCOC	ENSG00000074603	DPP8	15:65734805-65810040	0.020965	0
CCOC	ENSG00000114251	WNT5A	3:55499743-55521670	0.020989	0
CCOC	ENSG00000104324	CPQ	8:97657455-98155731	0.021139	0
CCOC	ENSG00000158014	SLC30A2	1:26364513-26373439	0.021158	0
CCOC	ENSG00000129988	LBP	20:36974814-37005653	0.021287	0
CCOC	ENSG00000169217	CD2BP2	16:30362087-30366682	0.021315	0
CCOC	ENSG00000198646	NCOA6	20:33302578-33413433	0.021371	0
CCOC	ENSG00000198429	ZNF69	19:11998633-12025366	0.021403	0
CCOC	ENSG00000165912	PACSIN3	11:47199073-47208010	0.021462	0
CCOC	ENSG00000013364	MVP	16:29831715-29859360	0.021554	0
CCOC	ENSG00000147364	FBXO25	8:356808-419876	0.021555	0
CCOC	ENSG00000090013	BLVRB	19:40953691-40971725	0.02157	0
CCOC	ENSG00000204351	SKIV2L	6:31926581-31937532	0.021591	0
CCOC	ENSG00000100991	TRPC4AP	20:33590207-33680618	0.021635	0
CCOC	ENSG00000091831	ESR1	6:152011631-152424409	0.021699	0
CCOC	ENSG00000184924	PTRHD1	2:25013136-25016251	0.021756	0
CCOC	ENSG00000180953	ST20	15:80191182-80216096	0.021778	0
CCOC	ENSG00000164451	FAM26D	6:116850176-116880031	0.021823	0
CCOC	ENSG00000148484	RSU1	10:16632615-16859509	0.021886	0
CCOC	ENSG00000205108	FAM205A	9:34723050-34729535	0.0219	0
CCOC	ENSG00000123700	KCNJ2	17:68164757-68176189	0.021925	0
CCOC	ENSG00000134138	MEIS2	15:37183222-37393500	0.02194	0
CCOC	ENSG00000106330	MOSPD3	7:100209725-100213003	0.022025	0
CCOC	ENSG00000160741	CRTC2	1:153920148-153931132	0.02203	0
CCOC	ENSG00000125810	CD93	20:23059993-23066977	0.022111	0
CCOC	ENSG00000134539	KLRD1	12:10457050-10469850	0.022122	0
CCOC	ENSG00000182218	HHIPL1	14:100111480-100143011	0.022171	0
CCOC	ENSG00000214309	MBLAC1	7:99724317-99726121	0.022288	0
CCOC	ENSG00000213204	C6orf165	6:88117690-88174191	0.022327	0
CCOC	ENSG00000198626	RYR2	1:237205510-237997288	0.02234	0
CCOC	ENSG00000196576	PLXNB2	22:50713408-50746062	0.022376	0
CCOC	ENSG00000132005	RFX1	19:14072342-14117134	0.0224	0
CCOC	ENSG00000160961	ZNF333	19:14800711-14844558	0.022409	0
CCOC	ENSG00000167065	DUSP18	22:31058039-31063874	0.022455	0
CCOC	ENSG00000001461	NIPAL3	1:24742245-24799473	0.0225	0
CCOC	ENSG00000165861	ZFYVE1	14:73436152-73493920	0.02251	0
CCOC	ENSG00000176105	YES1	18:721592-812327	0.022554	0
CCOC	ENSG00000108669	CYTH1	17:76670130-76778376	0.022572	0
CCOC	ENSG00000203795	FAM24A	10:124670217-124672627	0.022597	0
CCOC	ENSG00000137310	TCF19	6:31126303-31134183	0.022741	0
CCOC	ENSG00000125733	TRIP10	19:6739693-6751529	0.022756	0
CCOC	ENSG00000141030	COPS3	17:17149938-17184617	0.022881	0
CCOC	ENSG00000134899	ERCC5	13:103498191-103528351	0.022915	0
CCOC	ENSG00000176155	CCDC57	17:80059333-80170705	0.022939	0
CCOC	ENSG00000066135	KDM4A	1:44115797-44171189	0.022992	0
CCOC	ENSG00000183733	FIGLA	2:71004442-71017775	0.023051	0
CCOC	ENSG00000187257	RSBN1L	7:77325743-77409120	0.023187	0
CCOC	ENSG00000242550	SERPINB10	18:61575224-61602948	0.023239	0
CCOC	ENSG00000186191	BPIFB4	20:31669318-31699557	0.023247	0
CCOC	ENSG00000169550	MUC15	11:26580579-26593815	0.023276	0
CCOC	ENSG00000168242	HIST1H2BI	6:26273204-26273640	0.023289	0
CCOC	ENSG00000131379	C3orf20	3:14716606-14814543	0.023296	0
CCOC	ENSG00000177614	PGBD5	1:230457392-230561674	0.023318	0
CCOC	ENSG00000165795	NDRG2	14:21484922-21539098	0.023458	0
CCOC	ENSG00000173239	LIPM	10:90562487-90580315	0.023461	0
CCOC	ENSG00000130700	GATA5	20:61038553-61051026	0.023476	0
CCOC	ENSG00000166169	POLL	10:103338639-103348027	0.023511	0
CCOC	ENSG00000181023	OR56B1	11:5757678-5758768	0.023546	0
CCOC	ENSG00000168393	DTYMK	2:242615157-242626383	0.023596	0
CCOC	ENSG00000186439	TRDN	6:123537484-123958428	0.023636	0
CCOC	ENSG00000198673	FAM19A2	12:62102029-62586620	0.023649	0
CCOC	ENSG00000107295	SH3GL2	9:17578953-17797122	0.023749	0
CCOC	ENSG00000088888	MAVS	20:3827446-3856770	0.023819	0
CCOC	ENSG00000166147	FBN1	15:48700503-48937985	0.023833	0
CCOC	ENSG00000125877	ITPA	20:3189514-3204516	0.023855	0
CCOC	ENSG00000180801	ARSJ	4:114821432-114901281	0.023947	0
CCOC	ENSG00000180900	SCRIB	8:144873090-144897890	0.023968	0
CCOC	ENSG00000123975	CKS2	9:91926113-91931618	0.024005	0
CCOC	ENSG00000227059	ANHX	12:133794898-133812422	0.024032	0
CCOC	ENSG00000092051	JPH4	14:24037244-24048009	0.024054	0
CCOC	ENSG00000151790	TDO2	4:156824845-156841558	0.024071	0
CCOC	ENSG00000197364	S100A7L2	1:153409471-153412503	0.024138	0
CCOC	ENSG00000239590	OR1J4	9:125281420-125282361	0.024181	0
CCOC	ENSG00000186825	C2orf27B	2:132552534-132559234	0.024195	0
CCOC	ENSG00000136522	MRPL47	3:179306253-179322434	0.024264	0
CCOC	ENSG00000184007	PTP4A2	1:32372022-32403988	0.024318	0
CCOC	ENSG00000115596	WNT6	2:219724546-219738954	0.024368	0
CCOC	ENSG00000143578	CREB3L4	1:153940315-153946840	0.024375	0
CCOC	ENSG00000166682	TMPRSS5	11:113558268-113577151	0.024378	0
CCOC	ENSG00000116138	DNAJC16	1:15853343-15898228	0.024419	0
CCOC	ENSG00000077063	CTTNBP2	7:117350702-117513561	0.024422	0
CCOC	ENSG00000129932	DOHH	19:3490819-3500938	0.024522	0
CCOC	ENSG00000166997	CNPY4	7:99717265-99723131	0.024547	0
CCOC	ENSG00000078403	MLLT10	10:21813540-22032559	0.02457	0
CCOC	ENSG00000177932	ZNF354C	5:178487607-178510022	0.024623	0
CCOC	ENSG00000107949	BCCIP	10:127512102-127542264	0.02464	0
CCOC	ENSG00000056661	PCGF2	17:36890150-36906070	0.024653	0
CCOC	ENSG00000095397	DFNB31	9:117164360-117267789	0.024667	0
CCOC	ENSG00000174697	LEP	7:127881241-127897682	0.024868	0
CCOC	ENSG00000163735	CXCL5	4:74861359-74864446	0.024876	0
CCOC	ENSG00000184302	SIX6	14:60975938-60978525	0.024896	0
CCOC	ENSG00000185527	PDE6G	17:79617489-79623607	0.025008	0
CCOC	ENSG00000170852	KBTBD2	7:32907778-32931468	0.025057	0
CCOC	ENSG00000241878	PISD	22:32014477-32058550	0.025136	0
CCOC	ENSG00000133606	MKRN1	7:140152840-140179369	0.025141	0
CCOC	ENSG00000133246	PRAM1	19:8554940-8567538	0.025211	0
CCOC	ENSG00000159445	THEM4	1:151843342-151882361	0.025237	0
CCOC	ENSG00000090266	NDUFB2	7:140396481-140406446	0.025296	0
CCOC	ENSG00000087263	OGFOD1	16:56485424-56511407	0.025314	0
CCOC	ENSG00000105989	WNT2	7:116916685-116963343	0.025363	0
CCOC	ENSG00000117411	B4GALT2	1:44444874-44456843	0.025413	0
CCOC	ENSG00000057468	MSH4	1:76262556-76379581	0.025434	0
CCOC	ENSG00000113555	PCDH12	5:141323150-141338627	0.025495	0
CCOC	ENSG00000138646	HERC5	4:89378181-89427334	0.02552	0
CCOC	ENSG00000137204	SLC22A7	6:43265737-43273276	0.025565	0
CCOC	ENSG00000163694	RBM47	4:40425272-40632958	0.025674	0
CCOC	ENSG00000198844	ARHGEF15	17:8213556-8225834	0.025707	0
CCOC	ENSG00000115239	GPR75-ASB3	2:53897430-54087170	0.025744	0
CCOC	ENSG00000112242	E2F3	6:20402137-20493945	0.025836	0
CCOC	ENSG00000167491	GATAD2A	19:19496642-19619741	0.025838	0
CCOC	ENSG00000146399	TAAR1	6:132966123-132967142	0.025861	0
CCOC	ENSG00000204248	COL11A2	6:33130469-33160245	0.02591	0
CCOC	ENSG00000204661	C5orf60	5:179068545-179072083	0.026045	0
CCOC	ENSG00000101306	MYLK2	20:30407115-30422500	0.026066	0
CCOC	ENSG00000183662	FAM19A1	3:68040734-68594772	0.026073	0
CCOC	ENSG00000106635	BCL7B	7:72950683-72972065	0.026092	0
CCOC	ENSG00000216921	AC131097.4	2:242836139-242844774	0.026107	0
CCOC	ENSG00000166578	IQCD	12:113633246-113659086	0.026113	0
CCOC	ENSG00000007952	NOX1	X:100098313-100129334	0.026412	0
CCOC	ENSG00000171243	SOSTDC1	7:16501106-16505562	0.026479	0
CCOC	ENSG00000128383	APOBEC3A	22:39348755-39359189	0.026613	0
CCOC	ENSG00000141456	PELP1	17:4574679-4607712	0.026616	0
CCOC	ENSG00000241935	HOGA1	10:99344102-99372559	0.026684	0
CCOC	ENSG00000178726	THBD	20:23026270-23030301	0.026753	0
CCOC	ENSG00000101745	ANKRD12	18:9136751-9285983	0.026783	0
CCOC	ENSG00000104081	BMF	15:40380091-40401088	0.026854	0
CCOC	ENSG00000099917	MED15	22:20861849-20941919	0.026932	0
CCOC	ENSG00000128016	ZFP36	19:39897487-39900052	0.026963	0
CCOC	ENSG00000119514	GALNT12	9:101569981-101612363	0.027	0
CCOC	ENSG00000074706	IPCEF1	6:154475618-154677900	0.027009	0
CCOC	ENSG00000183431	SF3A3	1:38422647-38456019	0.027019	0
CCOC	ENSG00000136732	GYPC	2:127413426-127454251	0.027038	0
CCOC	ENSG00000169435	RASSF6	4:74437267-74486348	0.027047	0
CCOC	ENSG00000171016	PYGO1	15:55836805-55881050	0.027086	0
CCOC	ENSG00000165526	RPUSD4	11:126071989-126081587	0.027161	0
CCOC	ENSG00000128482	RNF112	17:19314491-19320589	0.027186	0
CCOC	ENSG00000125895	TMEM74B	20:1161213-1166077	0.027414	0
CCOC	ENSG00000177432	NAP1L5	4:89617066-89619023	0.027414	0
CCOC	ENSG00000143545	RAB13	1:153954093-153958853	0.027426	0
CCOC	ENSG00000107736	CDH23	10:73156691-73575704	0.027452	0
CCOC	ENSG00000078140	UBE2K	4:39699664-39784412	0.027465	0
CCOC	ENSG00000120798	NR2C1	12:95414005-95467404	0.02751	0
CCOC	ENSG00000204314	PRRT1	6:32116140-32119720	0.027527	0
CCOC	ENSG00000102871	TRADD	16:67188088-67193812	0.027544	0
CCOC	ENSG00000116237	ICMT	1:6281253-6296044	0.027648	0
CCOC	ENSG00000168427	KLHL30	2:239047310-239061547	0.027699	0
CCOC	ENSG00000064489	MEF2BNB-MEF2B	19:19256376-19303400	0.027733	0
CCOC	ENSG00000108924	HLF	17:53342321-53402426	0.027768	0
CCOC	ENSG00000163251	FZD5	2:208627310-208634143	0.027825	0
CCOC	ENSG00000100350	FOXRED2	22:36883233-36903148	0.027852	0
CCOC	ENSG00000178860	MSC	8:72753777-72756731	0.027897	0
CCOC	ENSG00000163376	KBTBD8	3:67048727-67061634	0.027902	0
CCOC	ENSG00000127952	STYXL1	7:75625610-75677321	0.02799	0
CCOC	ENSG00000163145	C1QTNF7	4:15341560-15447791	0.028034	0
CCOC	ENSG00000212127	TAS2R14	12:11090853-11091806	0.028155	0
CCOC	ENSG00000117400	MPL	1:43803475-43820135	0.028164	0
CCOC	ENSG00000198848	CES1	16:55836763-55867098	0.028186	0
CCOC	ENSG00000204548	DEFB121	20:29992648-30006314	0.028203	0
CCOC	ENSG00000175352	NRIP3	11:9002123-9025596	0.028302	0
CCOC	ENSG00000102984	ZNF821	16:71893583-71918093	0.028336	0
CCOC	ENSG00000066651	TRMT11	6:126307576-126360422	0.028408	0
CCOC	ENSG00000129048	ACKR4	3:132316081-132321488	0.028457	0
CCOC	ENSG00000121104	FAM117A	17:47787687-47841518	0.028531	0
CCOC	ENSG00000055950	MRPL43	10:102737579-102747272	0.028557	0
CCOC	ENSG00000169429	IL8	4:74606223-74609433	0.028573	0
CCOC	ENSG00000128604	IRF5	7:128577976-128590089	0.028578	0
CCOC	ENSG00000183530	PRR14L	22:32077333-32146120	0.028685	0
CCOC	ENSG00000118156	ZNF541	19:48023942-48075994	0.028699	0
CCOC	ENSG00000135823	STX6	1:180942164-180992074	0.028715	0
CCOC	ENSG00000158796	DEDD	1:161090767-161103192	0.028729	0
CCOC	ENSG00000167210	LOXHD1	18:44056935-44236996	0.028779	0
CCOC	ENSG00000166546	BEAN1	16:66461200-66527432	0.02882	0
CCOC	ENSG00000108021	FAM208B	10:5726801-5807742	0.028873	0
CCOC	ENSG00000153714	LURAP1L	9:12774989-12823059	0.028884	0
CCOC	ENSG00000188313	PLSCR1	3:146232967-146262628	0.028887	0
CCOC	ENSG00000108379	WNT3	17:44839872-44896126	0.028911	0
CCOC	ENSG00000079308	TNS1	2:218664512-218808796	0.028921	0
CCOC	ENSG00000116161	CACYBP	1:174968571-174981163	0.028945	0
CCOC	ENSG00000165675	ENOX2	X:129757355-130037219	0.028946	0
CCOC	ENSG00000128283	CDC42EP1	22:37956471-37965412	0.02895	0
CCOC	ENSG00000136152	COG3	13:46039030-46110833	0.02899	0
CCOC	ENSG00000242802	AP5Z1	7:4815262-4834026	0.029076	0
CCOC	ENSG00000136999	NOV	8:120428552-120436678	0.029082	0
CCOC	ENSG00000072803	FBXW11	5:171288553-171433877	0.029206	0
CCOC	ENSG00000188493	C19orf54	19:41246761-41256533	0.029226	0
CCOC	ENSG00000127561	SYNGR3	16:2039946-2044276	0.029289	0
CCOC	ENSG00000060656	PTPRU	1:29563028-29653325	0.029318	0
CCOC	ENSG00000177023	DEFB104B	8:7327830-7332604	0.029328	0
CCOC	ENSG00000152620	NADK2	5:36192694-36242258	0.029352	0
CCOC	ENSG00000175826	CTDNEP1	17:7146906-7155259	0.029356	0
CCOC	ENSG00000064419	TNPO3	7:128594234-128695227	0.029366	0
CCOC	ENSG00000183397	C19orf71	19:3538674-3544121	0.029443	0
CCOC	ENSG00000173068	BNC2	9:16409501-16870786	0.029448	0
CCOC	ENSG00000095539	SEMA4G	10:102729254-102745373	0.02947	0
CCOC	ENSG00000183862	CNGA2	X:150903218-150914036	0.029501	0
CCOC	ENSG00000103254	FAM173A	16:770581-772655	0.029534	0
CCOC	ENSG00000174453	VWC2L	2:215276292-215440774	0.029558	0
CCOC	ENSG00000144401	METTL21A	2:208473839-208490652	0.029705	0
CCOC	ENSG00000273439	ZNF8	19:58790314-58827023	0.029754	0
CCOC	ENSG00000184470	TXNRD2	22:19863040-19929359	0.029829	0
CCOC	ENSG00000180628	PCGF5	10:92922769-93044088	0.029906	0
CCOC	ENSG00000145284	SCD5	4:83550690-83720010	0.029908	0
CCOC	ENSG00000077943	ITGA8	10:15557711-15762328	0.029984	0
CCOC	ENSG00000178531	CTXN1	19:7989381-7991051	0.030083	0
CCOC	ENSG00000120332	TNN	1:175036994-175117202	0.030089	0
CCOC	ENSG00000179148	ALOXE3	17:7999218-8022365	0.030089	0
CCOC	ENSG00000154975	CA10	17:49707674-50237377	0.030144	0
CCOC	ENSG00000157470	FAM81A	15:59730372-59815751	0.030185	0
CCOC	ENSG00000142166	IFNAR1	21:34696748-34732129	0.030197	0
CCOC	ENSG00000100949	RABGGTA	14:24734744-24740833	0.030238	0
CCOC	ENSG00000111319	SCNN1A	12:6456009-6486896	0.030279	0
CCOC	ENSG00000213722	DDAH2	6:31694817-31698039	0.030294	0
CCOC	ENSG00000105383	CD33	19:51728335-51743274	0.030332	0
CCOC	ENSG00000178662	CSRNP3	2:166326157-166545917	0.030408	0
CCOC	ENSG00000112249	ASCC3	6:100956325-101329243	0.030417	0
CCOC	ENSG00000172789	HOXC5	12:54410642-54429145	0.030452	0
CCOC	ENSG00000150275	PCDH15	10:55562531-56561051	0.030455	0
CCOC	ENSG00000197632	SERPINB2	18:61554939-61571124	0.03046	0
CCOC	ENSG00000164023	SGMS2	4:108745721-108836203	0.030497	0
CCOC	ENSG00000075340	ADD2	2:70888334-70995375	0.030604	0
CCOC	ENSG00000143222	UFC1	1:161123534-161128646	0.030626	0
CCOC	ENSG00000197971	MBP	18:74690789-74844774	0.030666	0
CCOC	ENSG00000009954	BAZ1B	7:72854728-72936628	0.030743	0
CCOC	ENSG00000160213	CSTB	21:45193546-45196256	0.030841	0
CCOC	ENSG00000141150	RASL10B	17:34058679-34070540	0.030899	0
CCOC	ENSG00000109205	ODAM	4:71061441-71070293	0.03095	0
CCOC	ENSG00000136518	ACTL6A	3:179280708-179306193	0.030956	0
CCOC	ENSG00000141480	ARRB2	17:4613789-4624795	0.031023	0
CCOC	ENSG00000204175	GPRIN2	10:46993003-47005654	0.03103	0
CCOC	ENSG00000006652	IFRD1	7:112063199-112117258	0.031074	0
CCOC	ENSG00000036565	SLC18A1	8:20002366-20040717	0.031075	0
CCOC	ENSG00000198934	MAGEE1	X:75648046-75651746	0.031091	0
CCOC	ENSG00000129244	ATP1B2	17:7554254-7561089	0.031098	0
CCOC	ENSG00000122642	FKBP9	7:32997005-33046543	0.031132	0
CCOC	ENSG00000116254	CHD5	1:6161847-6240194	0.031207	0
CCOC	ENSG00000178776	C5orf46	5:147269579-147286101	0.031208	0
CCOC	ENSG00000173915	USMG5	10:105148807-105156270	0.031222	0
CCOC	ENSG00000141076	CIRH1A	16:69166499-69202937	0.03126	0
CCOC	ENSG00000119718	EIF2B2	14:75469612-75476294	0.031291	0
CCOC	ENSG00000212993	POU5F1B	8:128427131-128429455	0.031312	0
CCOC	ENSG00000073417	PDE8A	15:85523744-85682376	0.031336	0
CCOC	ENSG00000174744	BRMS1	11:66104804-66112596	0.031359	0
CCOC	ENSG00000139915	MDGA2	14:47308826-48144157	0.03139	0
CCOC	ENSG00000158019	BRE	2:28113482-28561768	0.03143	0
CCOC	ENSG00000154025	SLC5A10	17:18853989-18924004	0.031434	0
CCOC	ENSG00000112164	GLP1R	6:39016557-39056657	0.031473	0
CCOC	ENSG00000104964	AES	19:3052908-3062964	0.031484	0
CCOC	ENSG00000166171	DPCD	10:103330399-103369410	0.031581	0
CCOC	ENSG00000100979	PLTP	20:44527259-44541003	0.031615	0
CCOC	ENSG00000125124	BBS2	16:56504301-56554008	0.031631	0
CCOC	ENSG00000142178	SIK1	21:44834395-44847002	0.031636	0
CCOC	ENSG00000111731	C2CD5	12:22601511-22697452	0.031682	0
CCOC	ENSG00000205899	BHLHA9	17:1173858-1174565	0.03174	0
CCOC	ENSG00000146834	MEPCE	7:100026321-100031749	0.031778	0
CCOC	ENSG00000107104	KANK1	9:470294-746106	0.031852	0
CCOC	ENSG00000096401	CDC5L	6:44355251-44418161	0.031855	0
CCOC	ENSG00000188958	UTS2B	3:190984944-191048325	0.031883	0
CCOC	ENSG00000006740	ARHGAP44	17:12692829-12894960	0.031915	0
CCOC	ENSG00000137822	TUBGCP4	15:43663257-43698258	0.031928	0
CCOC	ENSG00000143870	PDIA6	2:10908889-10978103	0.031944	0
CCOC	ENSG00000111450	STX2	12:131274145-131323819	0.031963	0
CCOC	ENSG00000183696	UPP1	7:48128355-48148330	0.031983	0
CCOC	ENSG00000125879	OTOR	20:16728998-16732809	0.031992	0
CCOC	ENSG00000141905	NFIC	19:3359561-3469215	0.032053	0
CCOC	ENSG00000164162	ANAPC10	4:145915727-146019693	0.032081	0
CCOC	ENSG00000062716	VMP1	17:57784553-57919610	0.03214	0
CCOC	ENSG00000128536	CDHR3	7:105517251-105676877	0.032167	0
CCOC	ENSG00000147889	CDKN2A	9:21967751-21994490	0.032225	0
CCOC	ENSG00000163975	MFI2	3:196728611-196756687	0.032259	0
CCOC	ENSG00000154222	CC2D1B	1:52816265-52831877	0.032261	0
CCOC	ENSG00000140374	ETFA	15:76508628-76603810	0.032289	0
CCOC	ENSG00000134758	RNF138	18:29671818-29711524	0.032313	0
CCOC	ENSG00000197535	MYO5A	15:52599480-52821247	0.032334	0
CCOC	ENSG00000182149	IST1	16:71928311-71964542	0.032401	0
CCOC	ENSG00000165983	PTER	10:16478942-16555744	0.032508	0
CCOC	ENSG00000164109	MAD2L1	4:120980577-120988013	0.032529	0
CCOC	ENSG00000141424	SLC39A6	18:33688494-33709357	0.032544	0
CCOC	ENSG00000146963	C7orf55-LUC7L2	7:139025878-139108203	0.032564	0
CCOC	ENSG00000173473	SMARCC1	3:47627378-47823405	0.032564	0
CCOC	ENSG00000089248	ERP29	12:112451152-112461024	0.032591	0
CCOC	ENSG00000130287	NCAN	19:19322773-19363061	0.032647	0
CCOC	ENSG00000178188	SH2B1	16:28872939-28885534	0.032658	0
CCOC	ENSG00000143669	LYST	1:235824331-236047008	0.032715	0
CCOC	ENSG00000105639	JAK3	19:17935591-17958880	0.032751	0
CCOC	ENSG00000111247	RAD51AP1	12:4647940-4669213	0.032763	0
CCOC	ENSG00000214063	TSPAN4	11:842824-867116	0.032828	0
CCOC	ENSG00000119508	NR4A3	9:102584137-102629173	0.032842	0
CCOC	ENSG00000036549	ZZZ3	1:78028160-78149119	0.03286	0
CCOC	ENSG00000165886	UBTD1	10:99258768-99330960	0.032916	0
CCOC	ENSG00000142623	PADI1	1:17531621-17572501	0.032956	0
CCOC	ENSG00000107165	TYRP1	9:12693385-12710285	0.032968	0
CCOC	ENSG00000255398	HCAR3	12:123199303-123201439	0.033046	0
CCOC	ENSG00000204576	PRR3	6:30524486-30532473	0.033061	0
CCOC	ENSG00000140564	FURIN	15:91411885-91426687	0.033107	0
CCOC	ENSG00000144366	GULP1	2:189156396-189460653	0.033131	0
CCOC	ENSG00000168374	ARF4	3:57557090-57583215	0.033156	0
CCOC	ENSG00000104872	PIH1D1	19:49949550-49955266	0.033167	0
CCOC	ENSG00000114113	RBP2	3:139171726-139199662	0.033217	0
CCOC	ENSG00000165887	ANKRD2	10:99332256-99343641	0.033224	0
CCOC	ENSG00000155265	GOLGA7B	10:99609995-99631335	0.033226	0
CCOC	ENSG00000011600	TYROBP	19:36395303-36399211	0.033308	0
CCOC	ENSG00000163626	COX18	4:73920416-73935476	0.033317	0
CCOC	ENSG00000184221	OLIG1	21:34442450-34444728	0.033355	0
CCOC	ENSG00000120738	EGR1	5:137801181-137805004	0.033437	0
CCOC	ENSG00000162763	LRRC52	1:165513478-165533185	0.033458	0
CCOC	ENSG00000119574	ZBTB45	19:59024897-59031845	0.033492	0
CCOC	ENSG00000167880	EVPL	17:74002926-74023533	0.033519	0
CCOC	ENSG00000064102	ASUN	12:27058112-27091254	0.033522	0
CCOC	ENSG00000122367	LDB3	10:88426542-88495829	0.033528	0
CCOC	ENSG00000198488	B3GNT6	11:76745385-76753020	0.033575	0
CCOC	ENSG00000235162	C12orf75	12:105724414-105765296	0.03364	0
CCOC	ENSG00000083312	TNPO1	5:72112418-72210215	0.033666	0
CCOC	ENSG00000153495	TEX29	13:111973015-111996594	0.033697	0
CCOC	ENSG00000169836	TACR3	4:104510625-104640973	0.033748	0
CCOC	ENSG00000149043	SYT8	11:1855674-1858751	0.03381	0
CCOC	ENSG00000196104	SPOCK3	4:167654535-168155741	0.033866	0
CCOC	ENSG00000132522	GPS2	17:7215978-7218658	0.033942	0
CCOC	ENSG00000174669	SLC29A2	11:66129992-66139961	0.034042	0
CCOC	ENSG00000101405	OXT	20:3052266-3053163	0.034085	0
CCOC	ENSG00000180096	2021-09-01	16:30389454-30394171	0.034126	0
CCOC	ENSG00000163064	EN1	2:119599747-119605759	0.034149	0
CCOC	ENSG00000184857	TMEM186	16:8889037-8891505	0.03415	0
CCOC	ENSG00000141720	PIP4K2B	17:36921944-36956218	0.034206	0
CCOC	ENSG00000185480	PARPBP	12:102513956-102591298	0.034213	0
CCOC	ENSG00000169347	GP2	16:20320896-20339684	0.034304	0
CCOC	ENSG00000116604	MEF2D	1:156433513-156470634	0.034342	0
CCOC	ENSG00000100100	PIK3IP1	22:31677579-31688833	0.034369	0
CCOC	ENSG00000163141	BNIPL	1:151009029-151020076	0.034384	0
CCOC	ENSG00000057294	PKP2	12:32943680-33049780	0.034414	0
CCOC	ENSG00000035499	DEPDC1B	5:59892739-59995993	0.034578	0
CCOC	ENSG00000186160	CYP4Z1	1:47533160-47583992	0.034615	0
CCOC	ENSG00000183251	OR51B4	11:5322244-5323176	0.034638	0
CCOC	ENSG00000196337	CGB7	19:49557531-49561603	0.03472	0
CCOC	ENSG00000171855	IFNB1	9:21077104-21077943	0.034735	0
CCOC	ENSG00000040633	PHF23	17:7138347-7142825	0.03474	0
CCOC	ENSG00000128714	HOXD13	2:176957532-176960666	0.034762	0
CCOC	ENSG00000101200	AVP	20:3063202-3065370	0.034765	0
CCOC	ENSG00000007255	TRAPPC6A	19:45666186-45681501	0.034778	0
CCOC	ENSG00000206190	ATP10A	15:25923859-26110304	0.034822	0
CCOC	ENSG00000121073	SLC35B1	17:47778296-47785313	0.03493	0
CCOC	ENSG00000092330	TINF2	14:24703454-24712233	0.035114	0
CCOC	ENSG00000128739	SNRPN	15:25068794-25223730	0.035131	0
CCOC	ENSG00000105325	FZR1	19:3506261-3536755	0.035217	0
CCOC	ENSG00000176219	OR11H6	14:20691869-20692861	0.035242	0
CCOC	ENSG00000119411	BSPRY	9:116111812-116133513	0.035252	0
CCOC	ENSG00000269955	LUC7L2	7:139025105-139108203	0.035261	0
CCOC	ENSG00000254402	LRRC24	8:145747761-145752416	0.035268	0
CCOC	ENSG00000082397	EPB41L3	18:5392380-5630662	0.035405	0
CCOC	ENSG00000160932	LY6E	8:144099902-144103827	0.035434	0
CCOC	ENSG00000179632	MAF1	8:145159305-145162515	0.035506	0
CCOC	ENSG00000236027	PATE3	11:125658006-125661495	0.035564	0
CCOC	ENSG00000091986	CCDC80	3:112323407-112359977	0.035586	0
CCOC	ENSG00000164736	SOX17	8:55370495-55373456	0.035596	0
CCOC	ENSG00000008018	PSMB1	6:170844204-170862417	0.035629	0
CCOC	ENSG00000187272	KRTAP9-8	17:39394270-39395256	0.035731	0
CCOC	ENSG00000137392	CLPS	6:35762759-35765121	0.035751	0
CCOC	ENSG00000198832	SELM	22:31500763-31503551	0.03583	0
CCOC	ENSG00000142731	PLK4	4:128802016-128820379	0.035905	0
CCOC	ENSG00000113384	GOLPH3	5:32124817-32174425	0.035979	0
CCOC	ENSG00000127774	EMC6	17:3572090-3572962	0.035981	0
CCOC	ENSG00000221986	MYBPHL	1:109834987-109849663	0.036018	0
CCOC	ENSG00000138459	SLC35A5	3:112280857-112303286	0.036025	0
CCOC	ENSG00000160226	C21orf2	21:45748827-45759285	0.03607	0
CCOC	ENSG00000149575	SCN2B	11:118033519-118047337	0.036122	0
CCOC	ENSG00000171606	ZNF274	19:58694356-58724928	0.036178	0
CCOC	ENSG00000076770	MBNL3	X:131503342-131624063	0.036181	0
CCOC	ENSG00000145692	BHMT	5:78407604-78428113	0.03621	0
CCOC	ENSG00000115756	HPCAL1	2:10443015-10567743	0.036236	0
CCOC	ENSG00000123358	NR4A1	12:52416616-52453291	0.036294	0
CCOC	ENSG00000198967	OR10Z1	1:158576229-158577170	0.036316	0
CCOC	ENSG00000111300	NAA25	12:112464493-112546826	0.03644	0
CCOC	ENSG00000055118	KCNH2	7:150642044-150675402	0.036464	0
CCOC	ENSG00000182957	SPATA13	13:24553765-24881212	0.03652	0
CCOC	ENSG00000175189	INHBC	12:57828543-57844609	0.036528	0
CCOC	ENSG00000198276	UCKL1	20:62571182-62587800	0.036536	0
CCOC	ENSG00000103274	NUBP1	16:10837643-10863208	0.03656	0
CCOC	ENSG00000159873	CCDC117	22:29168662-29185283	0.036589	0
CCOC	ENSG00000188280	FAM230A	22:20706073-20710680	0.036599	0
CCOC	ENSG00000043093	DCUN1D1	3:182660153-182703731	0.036692	0
CCOC	ENSG00000179134	SAMD4B	19:39833108-39876340	0.036717	0
CCOC	ENSG00000127922	SHFM1	7:96318079-96339203	0.036742	0
CCOC	ENSG00000141738	GRB7	17:37894162-37903538	0.036761	0
CCOC	ENSG00000167011	NAT16	7:100813774-100823557	0.036765	0
CCOC	ENSG00000126759	CFP	X:47483612-47489704	0.036827	0
CCOC	ENSG00000111911	HINT3	6:126277861-126301390	0.03691	0
CCOC	ENSG00000145604	SKP2	5:36152091-36184143	0.036927	0
CCOC	ENSG00000132622	HSPA12B	20:3713317-3733758	0.036933	0
CCOC	ENSG00000135097	MSI1	12:120779133-120806983	0.036963	0
CCOC	ENSG00000223510	CDRT15	17:14139173-14140150	0.036992	0
CCOC	ENSG00000116786	PLEKHM2	1:16010632-16061264	0.036996	0
CCOC	ENSG00000204687	MAS1L	6:29454543-29455679	0.037056	0
CCOC	ENSG00000105467	SYNGR4	19:48867559-48879634	0.037134	0
CCOC	ENSG00000017427	IGF1	12:102789645-102875563	0.037165	0
CCOC	ENSG00000131097	HIGD1B	17:42923721-42927848	0.037176	0
CCOC	ENSG00000129235	TXNDC17	17:6544222-6547861	0.037186	0
CCOC	ENSG00000105426	PTPRS	19:5205514-5340814	0.037205	0
CCOC	ENSG00000162607	USP1	1:62901975-62917475	0.037247	0
CCOC	ENSG00000106261	ZKSCAN1	7:99613204-99642803	0.037255	0
CCOC	ENSG00000196531	NACA	12:57106211-57119326	0.037294	0
CCOC	ENSG00000102057	KCND1	X:48818639-48828251	0.037332	0
CCOC	ENSG00000171169	NAIF1	9:130823512-130829600	0.037351	0
CCOC	ENSG00000075213	SEMA3A	7:83587659-84122040	0.037373	0
CCOC	ENSG00000120860	CCDC53	12:102406717-102455902	0.037389	0
CCOC	ENSG00000124181	PLCG1	20:39766159-39804359	0.037396	0
CCOC	ENSG00000064490	RFXANK	19:19303008-19312678	0.037438	0
CCOC	ENSG00000006576	PHTF2	7:77428109-77586821	0.037445	0
CCOC	ENSG00000120586	MRC1	10:18098332-18200091	0.037459	0
CCOC	ENSG00000177200	CHD9	16:53088905-53361414	0.037498	0
CCOC	ENSG00000213123	TCTEX1D2	3:196018090-196045165	0.037512	0
CCOC	ENSG00000196924	FLNA	X:153576900-153603006	0.037605	0
CCOC	ENSG00000083844	ZNF264	19:57702868-57734214	0.037623	0
CCOC	ENSG00000196748	CLPSL2	6:35744343-35747329	0.037668	0
CCOC	ENSG00000197757	HOXC6	12:54410642-54424607	0.03767	0
CCOC	ENSG00000114054	PCCB	3:135969167-136056737	0.037682	0
CCOC	ENSG00000006555	TTC22	1:55246752-55266941	0.03782	0
CCOC	ENSG00000158023	WDR66	12:122356463-122441839	0.037824	0
CCOC	ENSG00000133135	RNF128	X:105937068-106040246	0.037849	0
CCOC	ENSG00000173638	SLC19A1	21:46934629-46983045	0.037849	0
CCOC	ENSG00000133794	ARNTL	11:13299325-13408813	0.037889	0
CCOC	ENSG00000116771	AGMAT	1:15898194-15911605	0.037897	0
CCOC	ENSG00000110063	DCPS	11:126173647-126215644	0.037936	0
CCOC	ENSG00000124207	CSE1L	20:47662783-47713497	0.037972	0
CCOC	ENSG00000169914	OTUD3	1:20208356-20239438	0.038004	0
CCOC	ENSG00000230989	HSBP1	16:83841508-83846607	0.038041	0
CCOC	ENSG00000147400	CETN2	X:151995871-151999301	0.038048	0
CCOC	ENSG00000244362	KRTAP19-7	21:31933417-31933608	0.038058	0
CCOC	ENSG00000173572	NLRP13	19:56403058-56443702	0.038157	0
CCOC	ENSG00000187918	OR51I2	11:5474638-5475707	0.038211	0
CCOC	ENSG00000154889	MPPE1	18:11883470-11908796	0.03826	0
CCOC	ENSG00000101421	CHMP4B	20:32399110-32442173	0.038271	0
CCOC	ENSG00000263002	ZNF234	19:44645710-44664462	0.0383	0
CCOC	ENSG00000123636	BAZ2B	2:160175490-160473059	0.03834	0
CCOC	ENSG00000196655	TRAPPC4	11:118889241-118894384	0.038344	0
CCOC	ENSG00000198846	TOX	8:59717977-60031767	0.038431	0
CCOC	ENSG00000204252	HLA-DOA	6:32971959-32977389	0.038435	0
CCOC	ENSG00000005961	ITGA2B	17:42449550-42466873	0.038512	0
CCOC	ENSG00000135211	TMEM60	7:77423045-77427747	0.038587	0
CCOC	ENSG00000110074	FOXRED1	11:126138935-126148027	0.038601	0
CCOC	ENSG00000176742	OR51V1	11:5220965-5221930	0.03868	0
CCOC	ENSG00000115641	FHL2	2:105977272-106055230	0.038683	0
CCOC	ENSG00000132972	RNF17	13:25338301-25454059	0.038694	0
CCOC	ENSG00000186710	CCDC42B	12:113587543-113597081	0.038778	0
CCOC	ENSG00000101000	PROCR	20:33759740-33803771	0.038827	0
CCOC	ENSG00000110958	PTGES3	12:57057125-57082138	0.038844	0
CCOC	ENSG00000163528	CHCHD4	3:14153577-14166371	0.038862	0
CCOC	ENSG00000151718	WWC2	4:184020463-184241930	0.038966	0
CCOC	ENSG00000118007	STAG1	3:136055077-136471245	0.039046	0
CCOC	ENSG00000006047	YBX2	17:7191571-7197876	0.039047	0
CCOC	ENSG00000159433	STARD9	15:42867857-43013196	0.039084	0
CCOC	ENSG00000015285	WAS	X:48542186-48549818	0.039094	0
CCOC	ENSG00000163012	ZSWIM2	2:187692207-187713897	0.039171	0
CCOC	ENSG00000077254	USP33	1:78161672-78225564	0.039189	0
CCOC	ENSG00000130254	SAFB2	19:5587007-5622991	0.039224	0
CCOC	ENSG00000198743	SLC5A3	21:35445503-35515334	0.039258	0
CCOC	ENSG00000243927	MRPS6	21:35445823-35515334	0.039258	0
CCOC	ENSG00000104375	STK3	8:99466859-99954799	0.039265	0
CCOC	ENSG00000130340	SNX9	6:158137078-158366109	0.03931	0
CCOC	ENSG00000177721	ANXA2R	5:43039182-43040447	0.039321	0
CCOC	ENSG00000185917	SETD4	21:37406839-37432869	0.039371	0
CCOC	ENSG00000073861	TBX21	17:45810610-45823485	0.039377	0
CCOC	ENSG00000205057	CLLU1OS	12:92813870-92821924	0.039446	0
CCOC	ENSG00000107738	C10orf54	10:73507313-73533337	0.039458	0
CCOC	ENSG00000116962	NID1	1:236139130-236228481	0.039477	0
CCOC	ENSG00000100297	MCM5	22:35796116-35820495	0.03958	0
CCOC	ENSG00000132824	SERINC3	20:43124864-43150726	0.039586	0
CCOC	ENSG00000170613	FAM71B	5:156589343-156593279	0.039605	0
CCOC	ENSG00000172987	HPSE2	10:100216834-100995632	0.039627	0
CCOC	ENSG00000198168	SVIP	11:22843598-22851382	0.039734	0
CCOC	ENSG00000121410	A1BG	19:58858172-58864865	0.039753	0
CCOC	ENSG00000163249	CCNYL1	2:208576264-208620898	0.039858	0
CCOC	ENSG00000240771	ARHGEF25	12:58003963-58011028	0.039915	0
CCOC	ENSG00000101746	NOL4	18:31431064-31803515	0.039925	0
CCOC	ENSG00000132958	TPTE2	13:19997017-20135714	0.04	0
CCOC	ENSG00000088812	ATRN	20:3451665-3631769	0.040001	0
CCOC	ENSG00000250423	KIAA1210	X:118212598-118284542	0.040027	0
CCOC	ENSG00000102390	PBDC1	X:75392771-75398033	0.04005	0
CCOC	ENSG00000132554	RGS22	8:100973164-101118344	0.040127	0
CCOC	ENSG00000152582	SPEF2	5:35617900-35814713	0.040143	0
CCOC	ENSG00000203837	PNLIPRP3	10:118187424-118237469	0.040214	0
CCOC	ENSG00000186790	FOXE3	1:47881744-47883724	0.04022	0
CCOC	ENSG00000182481	KPNA2	17:66031848-66042970	0.040291	0
CCOC	ENSG00000124104	SNX21	20:44462256-44471914	0.040292	0
CCOC	ENSG00000183570	PCBP3	21:47268023-47362368	0.040362	0
CCOC	ENSG00000162882	HAAO	2:42994229-43019753	0.040439	0
CCOC	ENSG00000073060	SCARB1	12:125262174-125348519	0.040459	0
CCOC	ENSG00000160207	HSF2BP	21:44949066-45079380	0.040461	0
CCOC	ENSG00000159917	ZNF235	19:44790501-44809606	0.04055	0
CCOC	ENSG00000175664	TEX26	13:31506834-31549639	0.040563	0
CCOC	ENSG00000144134	RABL2A	2:114384814-114400975	0.040591	0
CCOC	ENSG00000111305	GSG1	12:13236471-13256659	0.040631	0
CCOC	ENSG00000125398	SOX9	17:70117161-70122561	0.040655	0
CCOC	ENSG00000096070	BRPF3	6:36164408-36200567	0.040855	0
CCOC	ENSG00000114737	CISH	3:50643885-50649262	0.040864	0
CCOC	ENSG00000099331	MYO9B	19:17186591-17324104	0.040873	0
CCOC	ENSG00000122417	ODF2L	1:86812507-86862025	0.040949	0
CCOC	ENSG00000116151	MORN1	1:2251719-2323190	0.04098	0
CCOC	ENSG00000158457	TSPAN33	7:128784712-128809534	0.040987	0
CCOC	ENSG00000122121	XPNPEP2	X:128872946-128903525	0.040994	0
CCOC	ENSG00000171133	OR2K2	9:114089763-114091952	0.041035	0
CCOC	ENSG00000112592	TBP	6:170863384-170881958	0.041037	0
CCOC	ENSG00000162571	TTLL10	1:1109286-1133315	0.04107	0
CCOC	ENSG00000262628	OR1D5	17:2965963-2966901	0.041185	0
CCOC	ENSG00000110375	UPK2	11:118827008-118829269	0.041195	0
CCOC	ENSG00000181722	ZBTB20	3:114033348-114866132	0.041216	0
CCOC	ENSG00000171700	RGS19	20:62704534-62711356	0.041238	0
CCOC	ENSG00000148341	SH3GLB2	9:131770313-131790604	0.041378	0
CCOC	ENSG00000148677	ANKRD1	10:92671857-92681032	0.041394	0
CCOC	ENSG00000196169	KIF19	17:72322351-72351959	0.041394	0
CCOC	ENSG00000198026	ZNF335	20:44577292-44601560	0.041398	0
CCOC	ENSG00000106080	FKBP14	7:30050199-30066417	0.041421	0
CCOC	ENSG00000183454	GRIN2A	16:9847265-10276611	0.041423	0
CCOC	ENSG00000182919	C11orf54	11:93474769-93496250	0.041442	0
CCOC	ENSG00000183023	SLC8A1	2:40339286-40739575	0.041488	0
CCOC	ENSG00000034533	ASTE1	3:130732721-130745698	0.041587	0
CCOC	ENSG00000159147	DONSON	21:34937165-34961019	0.041627	0
CCOC	ENSG00000186094	AGBL4	1:48998527-50489626	0.041654	0
CCOC	ENSG00000113100	CDH9	5:26880709-27038689	0.041732	0
CCOC	ENSG00000182798	MAGEB17	X:16185604-16189516	0.041791	0
CCOC	ENSG00000164284	GRPEL2	5:148724364-148734146	0.041798	0
CCOC	ENSG00000165879	FRAT1	10:99079022-99081672	0.04187	0
CCOC	ENSG00000136521	NDUFB5	3:179322575-179342288	0.041875	0
CCOC	ENSG00000071994	PDCD2	6:170884660-170893780	0.042051	0
CCOC	ENSG00000164953	TMEM67	8:94767072-94831462	0.042175	0
CCOC	ENSG00000130962	PRRG1	X:37208528-37316548	0.042251	0
CCOC	ENSG00000160445	ZER1	9:131492065-131534220	0.042253	0
CCOC	ENSG00000163320	CGGBP1	3:88101100-88199016	0.042263	0
CCOC	ENSG00000154767	XPC	3:14186647-14220172	0.042267	0
CCOC	ENSG00000166847	DCTN5	16:23652687-23685068	0.04228	0
CCOC	ENSG00000180921	FAM83H	8:144806103-144822710	0.042318	0
CCOC	ENSG00000171722	C1orf111	1:162343515-162347017	0.04232	0
CCOC	ENSG00000213420	GPC2	7:99767229-99774990	0.042371	0
CCOC	ENSG00000205456	TP53TG3D	16:32263413-32267243	0.042458	0
CCOC	ENSG00000006451	RALA	7:39663152-39747723	0.042515	0
CCOC	ENSG00000183304	FAM9A	X:8758836-8769424	0.042652	0
CCOC	ENSG00000097007	ABL1	9:133588266-133763062	0.042687	0
CCOC	ENSG00000197353	LYPD2	8:143831628-143833952	0.042743	0
CCOC	ENSG00000197381	ADARB1	21:46494493-46646478	0.042762	0
CCOC	ENSG00000005059	CCDC109B	4:110481355-110608872	0.042779	0
CCOC	ENSG00000175768	TOMM5	9:37588410-37592636	0.042825	0
CCOC	ENSG00000099282	TSPAN15	10:71176821-71271569	0.042938	0
CCOC	ENSG00000204540	PSORS1C1	6:31082608-31107869	0.042967	0
CCOC	ENSG00000222028	PSMB11	14:23511376-23513269	0.042984	0
CCOC	ENSG00000114115	RBP1	3:139236276-139258671	0.043031	0
CCOC	ENSG00000150776	C11orf57	11:111944968-111955874	0.043088	0
CCOC	ENSG00000163281	GNPDA2	4:44694190-44728651	0.04313	0
CCOC	ENSG00000155130	MARCKS	6:114178527-114184652	0.043144	0
CCOC	ENSG00000074621	SLC24A1	15:65903618-65953334	0.043211	0
CCOC	ENSG00000091138	SLC26A3	7:107405912-107443678	0.043287	0
CCOC	ENSG00000180398	MCFD2	2:47129009-47168994	0.043341	0
CCOC	ENSG00000092529	CAPN3	15:42646545-42704515	0.043504	0
CCOC	ENSG00000153060	TEKT5	16:10721358-10788802	0.043521	0
CCOC	ENSG00000186049	KRT73	12:53001354-53012343	0.043552	0
CCOC	ENSG00000188690	UROS	10:127474091-127511837	0.043606	0
CCOC	ENSG00000086544	ITPKC	19:41222885-41246765	0.04362	0
CCOC	ENSG00000197753	LHFPL5	6:35773071-35791852	0.043652	0
CCOC	ENSG00000180318	ALX1	12:85673713-85695562	0.043751	0
CCOC	ENSG00000103489	XYLT1	16:17196181-17564738	0.043778	0
CCOC	ENSG00000176946	THAP4	2:242523820-242576753	0.04378	0
CCOC	ENSG00000067365	METTL22	16:8715497-8740079	0.04381	0
CCOC	ENSG00000006712	PAF1	19:39876269-39881835	0.04383	0
CCOC	ENSG00000173868	PHOSPHO1	17:47300728-47309009	0.043874	0
CCOC	ENSG00000105618	PRPF31	19:54618790-54635150	0.043888	0
CCOC	ENSG00000177212	OR2T33	1:248436154-248437116	0.043898	0
CCOC	ENSG00000179855	GIPC3	19:3585557-3593539	0.043898	0
CCOC	ENSG00000120549	KIAA1217	10:23983675-24836772	0.043931	0
CCOC	ENSG00000168397	ATG4B	2:242576775-242613272	0.043996	0
CCOC	ENSG00000174339	OR2Y1	5:180166123-180167058	0.044001	0
CCOC	ENSG00000077454	LRCH4	7:100171634-100183806	0.044099	0
CCOC	ENSG00000124214	STAU1	20:47729876-47804907	0.044102	0
CCOC	ENSG00000185278	ZBTB37	1:173837220-173856596	0.04413	0
CCOC	ENSG00000130733	YIPF2	19:11033444-11039357	0.044212	0
CCOC	ENSG00000145040	UCN2	3:48599151-48601201	0.044333	0
CCOC	ENSG00000134326	CMPK2	2:6980684-7006766	0.044351	0
CCOC	ENSG00000140519	RHCG	15:90014638-90039799	0.04437	0
CCOC	ENSG00000107290	SETX	9:135136827-135232113	0.044419	0
CCOC	ENSG00000143450	OAZ3	1:151735445-151743806	0.044461	0
CCOC	ENSG00000041982	TNC	9:117781854-117880536	0.044477	0
CCOC	ENSG00000184508	HDDC3	15:91474148-91475792	0.044485	0
CCOC	ENSG00000165131	C7orf34	7:142636603-142637957	0.04456	0
CCOC	ENSG00000136003	ISCU	12:108955239-108963160	0.044707	0
CCOC	ENSG00000169129	AFAP1L2	10:116041248-116164515	0.044762	0
CCOC	ENSG00000066468	FGFR2	10:123237844-123357972	0.044778	0
CCOC	ENSG00000100767	PAPLN	14:73704205-73741348	0.044788	0
CCOC	ENSG00000255587	RAB44	6:36665628-36700960	0.044847	0
CCOC	ENSG00000161542	PRPSAP1	17:74306868-74379970	0.044863	0
CCOC	ENSG00000104131	EIF3J	15:44829266-44855001	0.044869	0
CCOC	ENSG00000126545	CSN1S1	4:70796799-70812288	0.044877	0
CCOC	ENSG00000123353	ORMDL2	12:56211806-56214959	0.044932	0
CCOC	ENSG00000197714	ZNF460	19:57790776-57805436	0.044963	0
CCOC	ENSG00000153015	CWC27	5:64064755-64314590	0.045015	0
CCOC	ENSG00000162063	CCNF	16:2479395-2508859	0.045073	0
CCOC	ENSG00000152705	CATSPER3	5:134303596-134347397	0.045094	0
CCOC	ENSG00000081041	CXCL2	4:74962752-74964997	0.045111	0
CCOC	ENSG00000081051	AFP	4:74301933-74321492	0.045117	0
CCOC	ENSG00000186866	POFUT2	21:46683843-46707811	0.045217	0
CCOC	ENSG00000156802	ATAD2	8:124332090-124408705	0.045248	0
CCOC	ENSG00000186891	TNFRSF18	1:1138888-1142163	0.045251	0
CCOC	ENSG00000196083	IL1RAP	3:190231840-190378856	0.045261	0
CCOC	ENSG00000162572	SCNN1D	1:1215816-1227409	0.045271	0
CCOC	ENSG00000106066	CPVL	7:29035247-29225213	0.045331	0
CCOC	ENSG00000122643	NT5C3A	7:33053725-33102409	0.045361	0
CCOC	ENSG00000203943	SAMD13	1:84764049-84816481	0.04539	0
CCOC	ENSG00000173200	PARP15	3:122296435-122357894	0.045436	0
CCOC	ENSG00000241595	KRTAP9-4	17:39405939-39406905	0.045458	0
CCOC	ENSG00000143006	DMRTB1	1:53925072-53933158	0.045511	0
CCOC	ENSG00000189058	APOD	3:195295573-195311076	0.045545	0
CCOC	ENSG00000163751	CPA3	3:148583043-148614874	0.045561	0
CCOC	ENSG00000111596	CNOT2	12:70636774-70748773	0.045597	0
CCOC	ENSG00000176358	TAC4	17:47915671-47925379	0.045647	0
CCOC	ENSG00000108306	FBXL20	17:37408897-37558530	0.045653	0
CCOC	ENSG00000131115	ZNF227	19:44716684-44741421	0.045655	0
CCOC	ENSG00000139151	PLCZ1	12:18836110-18891020	0.045662	0
CCOC	ENSG00000075275	CELSR1	22:46756731-46933067	0.045699	0
CCOC	ENSG00000124120	TTPAL	20:43104526-43123244	0.045712	0
CCOC	ENSG00000168539	CHRM1	11:62676151-62689012	0.045751	0
CCOC	ENSG00000198250	ANTXRL	10:47658233-47701443	0.045785	0
CCOC	ENSG00000107816	LZTS2	10:102756864-102767593	0.045791	0
CCOC	ENSG00000119720	NRDE2	14:90744398-90798481	0.045824	0
CCOC	ENSG00000172322	CLEC12A	12:10103915-10147704	0.045886	0
CCOC	ENSG00000128512	DOCK4	7:111366164-111846462	0.045908	0
CCOC	ENSG00000170153	RNF150	4:141786708-142054630	0.045924	0
CCOC	ENSG00000130558	OLFM1	9:137967089-138013030	0.045933	0
CCOC	ENSG00000077274	CAPN6	X:110488327-110513774	0.045974	0
CCOC	ENSG00000114268	PFKFB4	3:48555117-48598607	0.046102	0
CCOC	ENSG00000147378	FATE1	X:150884508-150891666	0.046123	0
CCOC	ENSG00000237289	CKMT1B	15:43885055-43891604	0.046165	0
CCOC	ENSG00000182372	CLN8	8:1703944-1734736	0.046177	0
CCOC	ENSG00000174721	FGFBP3	10:93666345-93669258	0.046201	0
CCOC	ENSG00000177300	CLDN22	4:184239220-184241927	0.046292	0
CCOC	ENSG00000182521	TBPL2	14:55880928-55907263	0.046303	0
CCOC	ENSG00000239779	WBP1	2:74684996-74688018	0.046344	0
CCOC	ENSG00000127529	OR7C2	19:15052301-15053260	0.046363	0
CCOC	ENSG00000104611	SH2D4A	8:19171081-19253729	0.046407	0
CCOC	ENSG00000204941	PSG5	19:43671895-43690688	0.046413	0
CCOC	ENSG00000183145	RIPPLY3	21:38378456-38391959	0.046463	0
CCOC	ENSG00000147256	ARHGAP36	X:130192216-130223859	0.046556	0
CCOC	ENSG00000172995	ARPP21	3:35680666-35835988	0.046575	0
CCOC	ENSG00000172081	MOB3A	19:2071031-2096501	0.046611	0
CCOC	ENSG00000251258	RFPL4B	6:112668532-112672498	0.04663	0
CCOC	ENSG00000075188	NUP37	12:102467967-102514025	0.04664	0
CCOC	ENSG00000135346	CGA	6:87795216-87804865	0.046642	0
CCOC	ENSG00000163114	PDHA2	4:96761239-96762625	0.046754	0
CCOC	ENSG00000170004	CHD3	17:7788096-7816075	0.046756	0
CCOC	ENSG00000105738	SIPA1L3	19:38397525-38699009	0.046767	0
CCOC	ENSG00000167104	BPIFB6	20:31619454-31631853	0.046775	0
CCOC	ENSG00000179912	R3HDM2	12:57647547-57824782	0.04684	0
CCOC	ENSG00000104549	SQLE	8:126010720-126034525	0.046857	0
CCOC	ENSG00000180535	BHLHA15	7:97840759-97844769	0.046911	0
CCOC	ENSG00000185928	PAGR1	16:29827528-29833816	0.046911	0
CCOC	ENSG00000196275	GTF2IRD2	7:74210483-74267872	0.047036	0
CCOC	ENSG00000141497	ZMYND15	17:4643059-4649414	0.047076	0
CCOC	ENSG00000224420	ADM5	19:50191942-50194247	0.047081	0
CCOC	ENSG00000180353	HCLS1	3:121350246-121379791	0.047083	0
CCOC	ENSG00000114767	RRP9	3:51967442-51975957	0.047089	0
CCOC	ENSG00000173715	C11orf80	11:66512207-66613997	0.047093	0
CCOC	ENSG00000257127	CLLU1	12:92815307-92824778	0.047124	0
CCOC	ENSG00000242612	DECR2	16:451858-462487	0.047158	0
CCOC	ENSG00000187535	IFT140	16:1560428-1662109	0.047161	0
CCOC	ENSG00000123485	HJURP	2:234745486-234763212	0.047162	0
CCOC	ENSG00000163380	LMOD3	3:69156039-69171746	0.047174	0
CCOC	ENSG00000221978	CCNL2	1:1321091-1334718	0.047234	0
CCOC	ENSG00000170727	BOP1	8:145486056-145515120	0.047455	0
CCOC	ENSG00000163884	KLF15	3:126061478-126076236	0.047494	0
CCOC	ENSG00000143224	PPOX	1:161135832-161148136	0.047536	0
CCOC	ENSG00000117601	SERPINC1	1:173872938-173886516	0.047575	0
CCOC	ENSG00000188505	NCCRP1	19:39687604-39692522	0.047666	0
CCOC	ENSG00000158006	PAFAH2	1:26286258-26326366	0.047679	0
CCOC	ENSG00000009413	REV3L	6:111620234-111804421	0.047734	0
CCOC	ENSG00000175105	ZNF654	3:88108394-88193814	0.047764	0
CCOC	ENSG00000178093	TSSK6	19:19625028-19626469	0.047767	0
CCOC	ENSG00000084734	GCKR	2:27719470-27746556	0.047776	0
CCOC	ENSG00000204065	TCEAL5	X:102528618-102531797	0.047802	0
CCOC	ENSG00000136286	MYO1G	7:45002260-45018704	0.047837	0
CCOC	ENSG00000125991	ERGIC3	20:34129778-34145405	0.047879	0
CCOC	ENSG00000142515	KLK3	19:51358171-51364020	0.04788	0
CCOC	ENSG00000171522	PTGER4	5:40680032-40696962	0.047911	0
CCOC	ENSG00000215343	ZNF705D	8:11946847-11973025	0.047914	0
CCOC	ENSG00000179914	ITLN1	1:160846330-160854960	0.048055	0
CCOC	ENSG00000139343	SNRPF	12:96252709-96260238	0.0481	0
CCOC	ENSG00000102683	SGCG	13:23755060-23899304	0.048188	0
CCOC	ENSG00000107929	LARP4B	10:852854-977645	0.048294	0
CCOC	ENSG00000165105	RASEF	9:85594500-85678043	0.048459	0
CCOC	ENSG00000121716	PILRB	7:99955626-99965454	0.048474	0
CCOC	ENSG00000114850	SSR3	3:156257929-156272973	0.048518	0
CCOC	ENSG00000087111	PIGS	17:26880405-26898887	0.048585	0
CCOC	ENSG00000156345	CDK20	9:90581356-90589695	0.048751	0
CCOC	ENSG00000101361	NOP56	20:2633178-2639039	0.048776	0
CCOC	ENSG00000126010	GRPR	X:16141424-16171641	0.048797	0
CCOC	ENSG00000005483	KMT2E	7:104654637-104754532	0.048809	0
CCOC	ENSG00000165462	PHOX2A	11:71950121-71955220	0.048833	0
CCOC	ENSG00000139514	SLC7A1	13:30083551-30169825	0.048866	0
CCOC	ENSG00000198668	CALM1	14:90863327-90874619	0.048894	0
CCOC	ENSG00000124942	AHNAK	11:62201014-62314332	0.048911	0
CCOC	ENSG00000005486	RHBDD2	7:75508317-75518244	0.049126	0
CCOC	ENSG00000157259	GATAD1	7:92076762-92089381	0.049163	0
CCOC	ENSG00000149634	SPATA25	20:44515125-44517245	0.049248	0
CCOC	ENSG00000101266	CSNK2A1	20:463338-524482	0.049325	0
CCOC	ENSG00000186153	WWOX	16:78133310-79246567	0.049397	0
CCOC	ENSG00000166887	VPS39	15:42450899-42500524	0.049434	0
CCOC	ENSG00000091483	FH	1:241660857-241683085	0.049439	0
CCOC	ENSG00000188130	MAPK12	22:50691331-50700248	0.049552	0
CCOC	ENSG00000170606	HSPA4	5:132387662-132440709	0.049576	0
CCOC	ENSG00000101144	BMP7	20:55743809-55841707	0.049635	0
CCOC	ENSG00000167306	MYO5B	18:47349156-47721542	0.049657	0
CCOC	ENSG00000165506	DNAAF2	14:50091892-50101948	0.049672	0
CCOC	ENSG00000172519	OR10H5	19:15904859-15905806	0.049695	0
CCOC	ENSG00000269113	TRABD2B	1:48226200-48463009	0.049756	0
CCOC	ENSG00000110799	VWF	12:6058040-6233836	0.049815	0
CCOC	ENSG00000165388	ZNF488	10:48355029-48373866	0.049819	0
CCOC	ENSG00000154252	GAL3ST2	2:242716240-242743702	0.049824	0
CCOC	ENSG00000105793	GTPBP10	7:89975341-90020769	0.049858	0
CCOC	ENSG00000010219	DYRK4	12:4671375-4723041	0.04999	0
CCOC	ENSG00000214029	ZNF891	12:133696111-133707059	0.050025	0
CCOC	ENSG00000163377	FAM19A4	3:68780915-68981761	0.05003	0
CCOC	ENSG00000108443	RPS6KB1	17:57970407-58027787	0.050067	0
CCOC	ENSG00000135250	SRPK2	7:104754048-105039614	0.050154	0
CCOC	ENSG00000084628	NKAIN1	1:31652592-31712734	0.050164	0
CCOC	ENSG00000102069	UBE2NL	X:142967173-142968362	0.050176	0
CCOC	ENSG00000145824	CXCL14	5:134906369-134914969	0.050177	0
CCOC	ENSG00000143320	CRABP2	1:156669398-156675608	0.050182	0
CCOC	ENSG00000059804	SLC2A3	12:8071824-8088895	0.050184	0
CCOC	ENSG00000144355	DLX1	2:172950208-172954402	0.050255	0
CCOC	ENSG00000155066	PROM2	2:95939674-95966067	0.050274	0
CCOC	ENSG00000088899	LZTS3	20:3143263-3154238	0.050353	0
CCOC	ENSG00000020633	RUNX3	1:25226002-25291648	0.05038	0
CCOC	ENSG00000171604	CXXC5	5:139028301-139063467	0.050427	0
CCOC	ENSG00000138614	VWA9	15:65871095-65903627	0.05045	0
CCOC	ENSG00000168356	SCN11A	3:38887260-38995136	0.050568	0
CCOC	ENSG00000146826	C7orf43	7:99752043-99756338	0.050633	0
CCOC	ENSG00000178015	GPR150	5:94955980-94957284	0.050671	0
CCOC	ENSG00000126550	HTN1	4:70916159-70924559	0.050686	0
CCOC	ENSG00000138678	AGPAT9	4:84456886-84527028	0.050688	0
CCOC	ENSG00000124198	ARFGEF2	20:47538250-47653230	0.050698	0
CCOC	ENSG00000177294	FBXO39	17:6679523-6700420	0.050703	0
CCOC	ENSG00000125285	SOX21	13:95361876-95364389	0.05076	0
CCOC	ENSG00000066056	TIE1	1:43766566-43788781	0.050774	0
CCOC	ENSG00000005844	ITGAL	16:30483983-30534506	0.050817	0
CCOC	ENSG00000124257	NEURL2	20:44517111-44519926	0.050826	0
CCOC	ENSG00000105371	ICAM4	19:10397643-10399260	0.050866	0
CCOC	ENSG00000153989	NUS1	6:117996617-118031890	0.050887	0
CCOC	ENSG00000115758	ODC1	2:10580507-10588680	0.050902	0
CCOC	ENSG00000186352	ANKRD37	4:186317840-186321529	0.050946	0
CCOC	ENSG00000196151	WDSUB1	2:160092304-160143304	0.051082	0
CCOC	ENSG00000074696	PTPLAD1	15:65822804-65870693	0.051228	0
CCOC	ENSG00000102100	SLC35A2	X:48760459-48769235	0.051441	0
CCOC	ENSG00000067836	ROGDI	16:4846963-4852951	0.051478	0
CCOC	ENSG00000138698	RAP1GDS1	4:99182527-99365012	0.051523	0
CCOC	ENSG00000074855	ANO8	19:17434032-17445638	0.051561	0
CCOC	ENSG00000126785	RHOJ	14:63671080-63760230	0.051561	0
CCOC	ENSG00000155636	RBM45	2:178977149-178994383	0.051592	0
CCOC	ENSG00000155719	OTOA	16:21689835-21772050	0.051647	0
CCOC	ENSG00000142330	CAPN10	2:241526133-241538526	0.051744	0
CCOC	ENSG00000177688	SUMO4	6:149721284-149722182	0.051835	0
CCOC	ENSG00000111245	MYL2	12:111348623-111358404	0.051839	0
CCOC	ENSG00000099622	CIRBP	19:1269267-1274809	0.051869	0
CCOC	ENSG00000155592	ZKSCAN2	16:25247322-25269210	0.051917	0
CCOC	ENSG00000165511	C10orf25	10:45493146-45496470	0.051946	0
CCOC	ENSG00000086991	NOX4	11:89057521-89322779	0.051949	0
CCOC	ENSG00000172331	BPGM	7:134331531-134364568	0.052023	0
CCOC	ENSG00000173264	GPR137	11:64051781-64056972	0.052032	0
CCOC	ENSG00000126259	KIRREL2	19:36342552-36358048	0.052172	0
CCOC	ENSG00000128886	ELL3	15:44064798-44069502	0.052258	0
CCOC	ENSG00000185220	PGBD2	1:249200395-249215453	0.05227	0
CCOC	ENSG00000176798	OR51L1	11:5020213-5021160	0.052347	0
CCOC	ENSG00000203785	SPRR2E	1:153065611-153067001	0.052406	0
CCOC	ENSG00000198099	ADH4	4:100044832-100065449	0.052407	0
CCOC	ENSG00000125975	C20orf173	20:34108569-34117481	0.052441	0
CCOC	ENSG00000005156	LIG3	17:33307517-33332088	0.05246	0
CCOC	ENSG00000197079	KRT35	17:39632941-39637392	0.052504	0
CCOC	ENSG00000182518	FAM104B	X:55169535-55187628	0.052584	0
CCOC	ENSG00000127993	RBM48	7:92158079-92167319	0.052842	0
CCOC	ENSG00000111961	SASH1	6:148663729-148873185	0.052893	0
CCOC	ENSG00000126709	IFI6	1:27992572-27998724	0.052896	0
CCOC	ENSG00000242866	STRC	15:43891685-44002286	0.052912	0
CCOC	ENSG00000140743	CDR2	16:22357257-22385938	0.052962	0
CCOC	ENSG00000107404	DVL1	1:1270658-1284509	0.053074	0
CCOC	ENSG00000135776	ABCB10	1:229652329-229694442	0.053089	0
CCOC	ENSG00000221855	TAS2R41	7:143174966-143175889	0.053145	0
CCOC	ENSG00000204099	NEU4	2:242749920-242758742	0.05316	0
CCOC	ENSG00000198056	PRIM1	12:57125364-57146146	0.053249	0
CCOC	ENSG00000187730	GABRD	1:1950768-1962192	0.053268	0
CCOC	ENSG00000188522	FAM83G	17:18874381-18908060	0.053343	0
CCOC	ENSG00000133313	CNDP2	18:72163500-72190689	0.053385	0
CCOC	ENSG00000111537	IFNG	12:68548550-68553521	0.053388	0
CCOC	ENSG00000132530	XAF1	17:6658716-6678966	0.053448	0
CCOC	ENSG00000051825	MPHOSPH9	12:123640943-123717785	0.053453	0
CCOC	ENSG00000063046	EIF4B	12:53399942-53435993	0.053516	0
CCOC	ENSG00000168781	PPIP5K1	15:43825660-43882451	0.05354	0
CCOC	ENSG00000116031	CD207	2:71057343-71062953	0.053576	0
CCOC	ENSG00000105967	TFEC	7:115575202-115799950	0.053632	0
CCOC	ENSG00000183908	LRRC55	11:56949221-56959188	0.053733	0
CCOC	ENSG00000102554	KLF5	13:73629114-73651676	0.053745	0
CCOC	ENSG00000117983	MUC5B	11:1244295-1283406	0.053745	0
CCOC	ENSG00000165389	SPTSSA	14:34902144-34931468	0.053757	0
CCOC	ENSG00000111412	C12orf49	12:117151289-117175868	0.053788	0
CCOC	ENSG00000125166	GOT2	16:58741035-58768246	0.053798	0
CCOC	ENSG00000152049	KCNE4	2:223916648-223920355	0.053905	0
CCOC	ENSG00000163935	SFMBT1	3:52933221-53080089	0.054026	0
CCOC	ENSG00000048342	CC2D2A	4:15471489-15603594	0.054045	0
CCOC	ENSG00000197142	ACSL5	10:114133916-114188138	0.054066	0
CCOC	ENSG00000186943	OR13C8	9:107331449-107332411	0.054126	0
CCOC	ENSG00000148942	SLC5A12	11:26688566-26743574	0.05415	0
CCOC	ENSG00000082074	FYB	5:39105354-39270759	0.054184	0
CCOC	ENSG00000184454	NCMAP	1:24882567-24935819	0.054256	0
CCOC	ENSG00000163430	FSTL1	3:120113061-120169918	0.054264	0
CCOC	ENSG00000139323	POC1B	12:89813495-89920039	0.054281	0
CCOC	ENSG00000170848	PSG6	19:43406234-43422076	0.054288	0
CCOC	ENSG00000068120	COASY	17:40713485-40718299	0.054328	0
CCOC	ENSG00000196993	NPIPB9	16:28763573-28784171	0.054329	0
CCOC	ENSG00000189051	RNF222	17:8294022-8301144	0.054363	0
CCOC	ENSG00000134970	TMED7	5:114948905-114961876	0.054418	0
CCOC	ENSG00000188603	CLN3	16:28488600-28505897	0.054452	0
CCOC	ENSG00000186815	TPCN1	12:113659260-113736390	0.054753	0
CCOC	ENSG00000177106	EPS8L2	11:706120-727727	0.05477	0
CCOC	ENSG00000215545	DEFB116	20:29891015-29896388	0.054832	0
CCOC	ENSG00000105726	ATP13A1	19:19756007-19774512	0.05491	0
CCOC	ENSG00000171450	CDK5R2	2:219824350-219826877	0.05496	0
CCOC	ENSG00000001460	STPG1	1:24683489-24741587	0.054964	0
CCOC	ENSG00000134259	NGF	1:115828537-115880857	0.055165	0
CCOC	ENSG00000055917	PUM2	2:20448453-20550585	0.055171	0
CCOC	ENSG00000150967	ABCB9	12:123405498-123451056	0.055209	0
CCOC	ENSG00000146830	GIGYF1	7:100277130-100286870	0.055249	0
CCOC	ENSG00000108278	ZNHIT3	17:34842471-34855154	0.05525	0
CCOC	ENSG00000135722	FBXL8	16:67193891-67198077	0.055263	0
CCOC	ENSG00000162576	MXRA8	1:1288071-1297183	0.055276	0
CCOC	ENSG00000160055	TMEM234	1:32680040-32687954	0.055389	0
CCOC	ENSG00000163629	PTPN13	4:87515468-87736332	0.0554	0
CCOC	ENSG00000156304	SCAF4	21:33043313-33104431	0.055442	0
CCOC	ENSG00000058335	RASGRF1	15:79252289-79383215	0.055482	0
CCOC	ENSG00000253117	OC90	8:133036467-133071627	0.055482	0
CCOC	ENSG00000148377	IDI2	10:1064847-1071799	0.055555	0
CCOC	ENSG00000183963	SMTN	22:31477282-31500610	0.055572	0
CCOC	ENSG00000160613	PCSK7	11:117075788-117102811	0.055625	0
CCOC	ENSG00000072310	SREBF1	17:17714663-17740331	0.055627	0
CCOC	ENSG00000159459	UBR1	15:43235095-43398286	0.05564	0
CCOC	ENSG00000139304	PTPRQ	12:80838126-81073968	0.055675	0
CCOC	ENSG00000111701	APOBEC1	12:7801996-7823195	0.05569	0
CCOC	ENSG00000156467	UQCRB	8:97238904-97247862	0.05574	0
CCOC	ENSG00000169021	UQCRFS1	19:29698167-29704136	0.055745	0
CCOC	ENSG00000147434	CHRNA6	8:42607763-42623929	0.055963	0
CCOC	ENSG00000143156	NME7	1:169101258-169337186	0.056106	0
CCOC	ENSG00000170537	TMC7	16:18995256-19075264	0.056297	0
CCOC	ENSG00000109118	PHF12	17:27232264-27278622	0.056307	0
CCOC	ENSG00000023839	ABCC2	10:101542457-101611662	0.056325	0
CCOC	ENSG00000079950	STX7	6:132778663-132834337	0.056352	0
CCOC	ENSG00000143106	PSMA5	1:109941653-109969108	0.0564	0
CCOC	ENSG00000139117	CPNE8	12:39046002-39300395	0.056492	0
CCOC	ENSG00000115687	PASK	2:242045514-242089394	0.056497	0
CCOC	ENSG00000128394	APOBEC3F	22:39436609-39451977	0.056526	0
CCOC	ENSG00000196453	ZNF777	7:149128454-149158053	0.056669	0
CCOC	ENSG00000155846	PPARGC1B	5:149109815-149234585	0.056706	0
CCOC	ENSG00000108797	CNTNAP1	17:40834632-40852011	0.056739	0
CCOC	ENSG00000197122	SRC	20:35973088-36033835	0.056755	0
CCOC	ENSG00000180785	OR51E1	11:4665156-4676718	0.056766	0
CCOC	ENSG00000105171	POP4	19:30097170-30108162	0.056785	0
CCOC	ENSG00000198146	ZNF770	15:35270542-35280497	0.056828	0
CCOC	ENSG00000020256	ZFP64	20:50700550-50808524	0.056865	0
CCOC	ENSG00000159733	ZFYVE28	4:2271324-2420370	0.05688	0
CCOC	ENSG00000143858	SYT2	1:202559724-202679551	0.056889	0
CCOC	ENSG00000077498	TYR	11:88911040-89028927	0.05694	0
CCOC	ENSG00000143125	PROK1	1:110993788-111000000	0.056988	0
CCOC	ENSG00000142937	RPS8	1:45241213-45244427	0.057019	0
CCOC	ENSG00000165370	GPR101	X:136112307-136113833	0.057035	0
CCOC	ENSG00000156711	MAPK13	6:36098261-36112301	0.057248	0
CCOC	ENSG00000187742	SECISBP2	9:91933394-91974561	0.057265	0
CCOC	ENSG00000196873	CBWD3	9:70856839-70914932	0.05727	0
CCOC	ENSG00000114982	KANSL3	2:97258892-97304116	0.057354	0
CCOC	ENSG00000132640	BTBD3	20:11871377-11907243	0.0574	0
CCOC	ENSG00000165275	TRMT10B	9:37753797-37778969	0.057431	0
CCOC	ENSG00000104472	CHRAC1	8:141521397-141527252	0.057505	0
CCOC	ENSG00000101298	SNPH	20:1246948-1289971	0.057512	0
CCOC	ENSG00000203995	ZYG11A	1:53308183-53360247	0.057518	0
CCOC	ENSG00000158850	B4GALT3	1:161141100-161147758	0.057526	0
CCOC	ENSG00000187753	C9orf153	9:88835180-88874572	0.05754	0
CCOC	ENSG00000165792	METTL17	14:21457432-21465194	0.057545	0
CCOC	ENSG00000134809	TIMM10	11:57295936-57298232	0.05756	0
CCOC	ENSG00000165322	ARHGAP12	10:32094326-32217804	0.057596	0
CCOC	ENSG00000173040	EVC2	4:5544531-5711275	0.057664	0
CCOC	ENSG00000049540	ELN	7:73442119-73484237	0.057667	0
CCOC	ENSG00000184381	PLA2G6	22:38507502-38577857	0.057754	0
CCOC	ENSG00000205309	NT5M	17:17206680-17250977	0.057784	0
CCOC	ENSG00000103742	IGDCC4	15:65673825-65715410	0.057793	0
CCOC	ENSG00000225697	SLC26A6	3:48663156-48672926	0.0578	0
CCOC	ENSG00000080910	CFHR2	1:196912888-196928356	0.05785	0
CCOC	ENSG00000150995	ITPR1	3:4535032-4889524	0.057857	0
CCOC	ENSG00000156222	SLC28A1	15:85427794-85489027	0.05792	0
CCOC	ENSG00000187609	EXD3	9:140201346-140317714	0.058004	0
CCOC	ENSG00000128881	TTBK2	15:43030928-43213037	0.058052	0
CCOC	ENSG00000130699	TAF4	20:60549854-60640866	0.058077	0
CCOC	ENSG00000145882	PCYOX1L	5:148737570-148749221	0.05808	0
CCOC	ENSG00000204219	TCEA3	1:23707555-23751269	0.058121	0
CCOC	ENSG00000157657	ZNF618	9:116638562-116818875	0.058171	0
CCOC	ENSG00000181885	CLDN7	17:7163222-7166863	0.058221	0
CCOC	ENSG00000103056	SMPD3	16:68392230-68482409	0.058264	0
CCOC	ENSG00000198691	ABCA4	1:94458393-94586705	0.058275	0
CCOC	ENSG00000019549	SNAI2	8:49830236-49833999	0.058281	0
CCOC	ENSG00000188385	JAKMIP3	10:133879367-133998482	0.058303	0
CCOC	ENSG00000108106	UBE2S	19:55912650-55919325	0.05831	0
CCOC	ENSG00000178917	ZNF852	3:44539924-44552222	0.058368	0
CCOC	ENSG00000180638	SLC47A2	17:19581626-19622990	0.058479	0
CCOC	ENSG00000155966	AFF2	X:147582139-148082193	0.058528	0
CCOC	ENSG00000127124	HIVEP3	1:41972036-42501596	0.058591	0
CCOC	ENSG00000197223	C1D	2:68269332-68290159	0.05864	0
CCOC	ENSG00000119866	BCL11A	2:60678302-60780633	0.058702	0
CCOC	ENSG00000204574	ABCF1	6:30539170-30559309	0.058738	0
CCOC	ENSG00000119559	C19orf25	19:1473200-1479555	0.058772	0
CCOC	ENSG00000113638	TTC33	5:40711678-40756072	0.0588	0
CCOC	ENSG00000130584	ZBTB46	20:62375021-62463731	0.058806	0
CCOC	ENSG00000178722	C5orf64	5:60933636-61002362	0.058815	0
CCOC	ENSG00000111249	CUX2	12:111471828-111788358	0.058876	0
CCOC	ENSG00000174482	LINGO2	9:27948084-29212998	0.058982	0
CCOC	ENSG00000181036	FCRL6	1:159770282-159786047	0.059019	0
CCOC	ENSG00000138092	CENPO	2:25016175-25045245	0.05902	0
CCOC	ENSG00000165060	FXN	9:71650479-71715094	0.05903	0
CCOC	ENSG00000145242	EPHA5	4:66185281-66536529	0.059053	0
CCOC	ENSG00000167363	FN3K	17:80693452-80709073	0.059087	0
CCOC	ENSG00000171723	GPHN	14:66974125-67648525	0.059094	0
CCOC	ENSG00000155329	ZCCHC10	5:132332677-132362275	0.059172	0
CCOC	ENSG00000118257	NRP2	2:206547184-206662857	0.05925	0
CCOC	ENSG00000174276	ZNHIT2	11:64883875-64885170	0.05929	0
CCOC	ENSG00000170854	MINA	3:97660661-97691295	0.059327	0
CCOC	ENSG00000145113	MUC4	3:195473636-195539148	0.059383	0
CCOC	ENSG00000180872	DEFB112	6:50011288-50016364	0.059387	0
CCOC	ENSG00000100271	TTLL1	22:43435522-43485434	0.059428	0
CCOC	ENSG00000105464	GRIN2D	19:48898132-48948188	0.059457	0
CCOC	ENSG00000249860	MTRNR2L5	10:57358750-57360488	0.059559	0
CCOC	ENSG00000106367	AP1S1	7:100797685-100804557	0.059584	0
CCOC	ENSG00000104695	PPP2CB	8:30643126-30670352	0.059818	0
CCOC	ENSG00000213928	IRF9	14:24630422-24635774	0.059831	0
CCOC	ENSG00000227051	C14orf132	14:96505661-96560226	0.059861	0
CCOC	ENSG00000163939	PBRM1	3:52579368-52719866	0.059893	0
CCOC	ENSG00000241127	YAE1D1	7:39605984-39651681	0.059893	0
CCOC	ENSG00000105479	CCDC114	19:48799709-48825191	0.059911	0
CCOC	ENSG00000154134	ROBO3	11:124735305-124751370	0.060061	0
CCOC	ENSG00000215012	C22orf29	22:19833661-19842371	0.060084	0
CCOC	ENSG00000196344	ADH7	4:100333418-100356667	0.060086	0
CCOC	ENSG00000108578	BLMH	17:28575213-28619184	0.060136	0
CCOC	ENSG00000094916	CBX5	12:54624730-54673915	0.060152	0
CCOC	ENSG00000124795	DEK	6:18224400-18264799	0.060183	0
CCOC	ENSG00000103335	PIEZO1	16:88781746-88851372	0.060196	0
CCOC	ENSG00000135045	C9orf40	9:77561499-77567802	0.060201	0
CCOC	ENSG00000170615	SLC26A5	7:102993177-103086624	0.060213	0
CCOC	ENSG00000126001	CEP250	20:34042988-34105360	0.060364	0
CCOC	ENSG00000112182	BACH2	6:90636247-91006627	0.06038	0
CCOC	ENSG00000181965	NEUROG1	5:134869972-134871639	0.060503	0
CCOC	ENSG00000075790	BCAP29	7:107220422-107263762	0.060511	0
CCOC	ENSG00000214013	GANC	15:42566366-42646599	0.060532	0
CCOC	ENSG00000237353	PATE4	11:125703211-125709967	0.060796	0
CCOC	ENSG00000133121	STARD13	13:33677272-34250932	0.06082	0
CCOC	ENSG00000120688	WBP4	13:41634973-41658142	0.060911	0
CCOC	ENSG00000125868	DSTN	20:17549818-17588887	0.060923	0
CCOC	ENSG00000176020	AMIGO3	3:49754267-49757238	0.060977	0
CCOC	ENSG00000164898	C7orf55	7:139025196-139031065	0.061026	0
CCOC	ENSG00000179091	CYC1	8:145149960-145152428	0.061085	0
CCOC	ENSG00000187800	PEAR1	1:156863496-156886226	0.061105	0
CCOC	ENSG00000152894	PTPRK	6:128289924-128841870	0.061119	0
CCOC	ENSG00000143499	SMYD2	1:214454565-214510477	0.061134	0
CCOC	ENSG00000101868	POLA1	X:24712038-25015103	0.06117	0
CCOC	ENSG00000128951	DUT	15:48623215-48635570	0.061177	0
CCOC	ENSG00000143033	MTF2	1:93544792-93604638	0.061188	0
CCOC	ENSG00000189253	TRIM64B	11:89603606-89609185	0.061205	0
CCOC	ENSG00000161970	RPL26	17:8280834-8286565	0.061219	0
CCOC	ENSG00000131914	LIN28A	1:26737269-26756219	0.061236	0
CCOC	ENSG00000185561	TLCD2	17:1606084-1613662	0.061254	0
CCOC	ENSG00000164978	NUDT2	9:34329504-34343711	0.061278	0
CCOC	ENSG00000141425	RPRD1A	18:33569787-33647538	0.061298	0
CCOC	ENSG00000270181	BIVM-ERCC5	13:103459496-103528351	0.061327	0
CCOC	ENSG00000197622	CDC42SE1	1:151023447-151032125	0.061328	0
CCOC	ENSG00000163067	ZNF2	2:95831165-95850065	0.061391	0
CCOC	ENSG00000138061	CYP1B1	2:38294746-38303323	0.061446	0
CCOC	ENSG00000136237	RAPGEF5	7:22157908-22396751	0.06145	0
CCOC	ENSG00000175556	LONRF3	X:118108577-118152816	0.061453	0
CCOC	ENSG00000173064	HECTD4	12:112597992-112820113	0.061474	0
CCOC	ENSG00000149925	ALDOA	16:30064411-30081741	0.061484	0
CCOC	ENSG00000163501	IHH	2:219919142-219925238	0.061534	0
CCOC	ENSG00000197579	TOPORS	9:32540542-32552626	0.061547	0
CCOC	ENSG00000172456	FGGY	1:59762625-60228402	0.061549	0
CCOC	ENSG00000128191	DGCR8	22:20067755-20099400	0.0616	0
CCOC	ENSG00000140463	BBS4	15:72978520-73030817	0.061602	0
CCOC	ENSG00000186377	CYP4X1	1:47427036-47516423	0.061708	0
CCOC	ENSG00000133250	ZNF414	19:8575462-8579048	0.061722	0
CCOC	ENSG00000114853	ZBTB47	3:42695176-42709072	0.061902	0
CCOC	ENSG00000196341	OR8D1	11:124179736-124180662	0.061928	0
CCOC	ENSG00000182791	CCDC87	11:66357640-66360554	0.061945	0
CCOC	ENSG00000164347	GFM2	5:74017029-74063196	0.06195	0
CCOC	ENSG00000167792	NDUFV1	11:67374323-67380012	0.06201	0
CCOC	ENSG00000165678	GHITM	10:85899185-85913311	0.062103	0
CCOC	ENSG00000179008	C14orf39	14:60902674-60952764	0.062108	0
CCOC	ENSG00000198353	HOXC4	12:54388716-54449814	0.062117	0
CCOC	ENSG00000221866	PLXNA4	7:131808091-132333447	0.062333	0
CCOC	ENSG00000189013	KIR2DL4	19:55304500-55325972	0.062432	0
CCOC	ENSG00000169282	KCNAB1	3:155838337-156256927	0.062462	0
CCOC	ENSG00000088766	CRLS1	20:5986739-6020699	0.062485	0
CCOC	ENSG00000142698	C1orf94	1:34632624-34684732	0.062551	0
CCOC	ENSG00000166558	SLC38A8	16:84043389-84075762	0.062611	0
CCOC	ENSG00000157240	FZD1	7:90893783-90898132	0.062618	0
CCOC	ENSG00000167524	SGK494	17:26934799-26941377	0.062657	0
CCOC	ENSG00000186440	OR6P1	1:158532441-158533394	0.062669	0
CCOC	ENSG00000164404	GDF9	5:132196877-132202238	0.062694	0
CCOC	ENSG00000162998	FRZB	2:183698002-183731498	0.062714	0
CCOC	ENSG00000105447	GRWD1	19:48949030-48957164	0.062724	0
CCOC	ENSG00000126337	KRT36	17:39642388-39648799	0.062748	0
CCOC	ENSG00000178690	DYNAP	18:52258390-52266724	0.062807	0
CCOC	ENSG00000162378	ZYG11B	1:53192126-53293014	0.062836	0
CCOC	ENSG00000130656	HBZ	16:192921-204504	0.062881	0
CCOC	ENSG00000177464	GPR4	19:46093022-46105466	0.062957	0
CCOC	ENSG00000068024	HDAC4	2:239969864-240323346	0.062992	0
CCOC	ENSG00000126264	HCST	19:36393382-36395173	0.063032	0
CCOC	ENSG00000131069	ACSS2	20:33462766-33515769	0.063043	0
CCOC	ENSG00000145860	RNF145	5:158584417-158637061	0.06305	0
CCOC	ENSG00000182103	FAM181B	11:82443046-82444906	0.063069	0
CCOC	ENSG00000167037	SGSM1	22:25202136-25322813	0.063075	0
CCOC	ENSG00000164081	TEX264	3:51705191-51738339	0.063157	0
CCOC	ENSG00000169242	EFNA1	1:155100349-155107386	0.063158	0
CCOC	ENSG00000167232	ZNF91	19:23540498-23578269	0.063167	0
CCOC	ENSG00000188807	TMEM201	1:9648932-9674935	0.063182	0
CCOC	ENSG00000114503	NCBP2	3:196662273-196669464	0.063194	0
CCOC	ENSG00000108771	DHX58	17:40253422-40264751	0.063252	0
CCOC	ENSG00000023516	AKAP11	13:42846261-42897403	0.063343	0
CCOC	ENSG00000134769	DTNA	18:32073254-32471808	0.063347	0
CCOC	ENSG00000125686	MED1	17:37560538-37607527	0.063413	0
CCOC	ENSG00000106692	FKTN	9:108320411-108403399	0.063432	0
CCOC	ENSG00000157637	SLC38A10	17:79218799-79269233	0.063468	0
CCOC	ENSG00000173267	SNCG	10:88717504-88723017	0.063542	0
CCOC	ENSG00000125903	DEFB129	20:207899-210527	0.063576	0
CCOC	ENSG00000221954	OR4C12	11:50003009-50004071	0.063606	0
CCOC	ENSG00000111850	SMIM8	6:88032306-88052043	0.063618	0
CCOC	ENSG00000189050	RNFT1	17:58029723-58042117	0.063619	0
CCOC	ENSG00000164256	PRDM9	5:23507724-23528706	0.063639	0
CCOC	ENSG00000107372	ZFAND5	9:74966341-74980163	0.063649	0
CCOC	ENSG00000124193	SRSF6	20:42086504-42092245	0.063665	0
CCOC	ENSG00000169919	GUSB	7:65425671-65447301	0.063676	0
CCOC	ENSG00000148296	SURF6	9:136197543-136203047	0.063706	0
CCOC	ENSG00000137770	CTDSPL2	15:44719579-44819455	0.06376	0
CCOC	ENSG00000100982	PCIF1	20:44563313-44576732	0.063768	0
CCOC	ENSG00000151365	THRSP	11:77774907-77779403	0.063838	0
CCOC	ENSG00000160233	LRRC3	21:45875393-45878739	0.06406	0
CCOC	ENSG00000151176	PLBD2	12:113796371-113827458	0.064187	0
CCOC	ENSG00000121570	DPPA4	3:109044988-109056419	0.064217	0
CCOC	ENSG00000138735	PDE5A	4:120415550-120549981	0.064245	0
CCOC	ENSG00000171617	ENC1	5:73923231-73937249	0.0643	0
CCOC	ENSG00000169193	CCDC126	7:23636998-23684327	0.064312	0
CCOC	ENSG00000104979	C19orf53	19:13885257-13889587	0.064371	0
CCOC	ENSG00000132286	TIMM10B	11:6502677-6506109	0.064394	0
CCOC	ENSG00000104886	PLEKHJ1	19:2233149-2237703	0.064413	0
CCOC	ENSG00000173599	PC	11:66615993-66725847	0.064414	0
CCOC	ENSG00000186150	UBL4B	1:110655062-110656569	0.064421	0
CCOC	ENSG00000152034	MCHR2	6:100367786-100442114	0.064445	0
CCOC	ENSG00000112183	RBM24	6:17281739-17294102	0.064507	0
CCOC	ENSG00000196569	LAMA2	6:129204286-129837711	0.064523	0
CCOC	ENSG00000126522	ASL	7:65540776-65558330	0.06468	0
CCOC	ENSG00000134765	DSC1	18:28709199-28742819	0.064773	0
CCOC	ENSG00000087494	PTHLH	12:28111017-28125664	0.064835	0
CCOC	ENSG00000196917	HCAR1	12:123212153-123215129	0.064938	0
CCOC	ENSG00000166748	AGBL1	15:86623137-87572283	0.065087	0
CCOC	ENSG00000122376	FAM35A	10:88854953-88951225	0.065105	0
CCOC	ENSG00000100079	LGALS2	22:37966253-37976024	0.065124	0
CCOC	ENSG00000137500	CCDC90B	11:82972498-82997445	0.065131	0
CCOC	ENSG00000167359	OR51I1	11:5461772-5462783	0.065135	0
CCOC	ENSG00000124177	CHD6	20:40030741-40247133	0.065174	0
CCOC	ENSG00000173369	C1QB	1:22979682-22988130	0.065234	0
CCOC	ENSG00000164951	PDP1	8:94929083-94938296	0.065243	0
CCOC	ENSG00000164587	RPS14	5:149822712-149829351	0.065263	0
CCOC	ENSG00000104808	DHDH	19:49436939-49448226	0.065291	0
CCOC	ENSG00000099204	ABLIM1	10:116190869-116444762	0.065338	0
CCOC	ENSG00000106397	PLOD3	7:100849258-100861011	0.065341	0
CCOC	ENSG00000196199	MPHOSPH8	13:20207787-20247599	0.065397	0
CCOC	ENSG00000141161	UNC45B	17:33474787-33516364	0.065414	0
CCOC	ENSG00000152154	TMEM178A	2:39892638-39945103	0.065419	0
CCOC	ENSG00000198633	ZNF534	19:52932394-52942720	0.065424	0
CCOC	ENSG00000205174	C7orf66	7:108524038-108524637	0.065533	0
CCOC	ENSG00000117505	DR1	1:93811478-93828149	0.065541	0
CCOC	ENSG00000251692	PTX4	16:1535940-1538468	0.065555	0
CCOC	ENSG00000143140	GJA5	1:147228332-147253165	0.065566	0
CCOC	ENSG00000184730	APOBR	16:28505970-28510291	0.06557	0
CCOC	ENSG00000242221	PSG2	19:43568362-43586893	0.065603	0
CCOC	ENSG00000151849	CENPJ	13:25456412-25497027	0.065612	0
CCOC	ENSG00000106524	ANKMY2	7:16639401-16685442	0.065673	0
CCOC	ENSG00000147081	AKAP4	X:49955411-49965664	0.065759	0
CCOC	ENSG00000162377	COA7	1:53152014-53164038	0.065777	0
CCOC	ENSG00000073711	PPP2R3A	3:135684515-135866752	0.065833	0
CCOC	ENSG00000172053	QARS	3:49133365-49142562	0.065835	0
CCOC	ENSG00000157741	UBN2	7:138915978-138992982	0.065883	0
CCOC	ENSG00000177076	ACER2	9:19408925-19452618	0.065885	0
CCOC	ENSG00000196182	STK40	1:36805225-36851525	0.065955	0
CCOC	ENSG00000085514	PILRA	7:99971068-99997722	0.065964	0
CCOC	ENSG00000198625	MDM4	1:204485507-204596131	0.065992	0
CCOC	ENSG00000105538	RASIP1	19:49223842-49244136	0.066018	0
CCOC	ENSG00000180828	BHLHE22	8:65492795-65496191	0.066026	0
CCOC	ENSG00000166619	BLCAP	20:36145819-36156333	0.06606	0
CCOC	ENSG00000220205	VAMP2	17:8062465-8066293	0.066076	0
CCOC	ENSG00000062370	ZNF112	19:44830706-44860856	0.066107	0
CCOC	ENSG00000105290	APLP1	19:36358806-36370699	0.066177	0
CCOC	ENSG00000137942	FNBP1L	1:93913688-94020218	0.066197	0
CCOC	ENSG00000094841	UPRT	X:74493894-74524732	0.0662	0
CCOC	ENSG00000198734	F5	1:169481192-169555769	0.066221	0
CCOC	ENSG00000104213	PDGFRL	8:17433942-17500642	0.066256	0
CCOC	ENSG00000198624	CCDC69	5:150560613-150603654	0.066302	0
CCOC	ENSG00000137269	LRRC1	6:53659295-53789490	0.066324	0
CCOC	ENSG00000005020	SKAP2	7:26697397-27034862	0.066345	0
CCOC	ENSG00000164266	SPINK1	5:147204143-147218794	0.066408	0
CCOC	ENSG00000126870	WDR60	7:158649269-158738883	0.066428	0
CCOC	ENSG00000169884	WNT10B	12:49359123-49365641	0.066448	0
CCOC	ENSG00000145348	TBCK	4:106967233-107237861	0.066526	0
CCOC	ENSG00000204713	TRIM27	6:28870779-28891768	0.066528	0
CCOC	ENSG00000125522	NPBWR2	20:62737183-62738184	0.066531	0
CCOC	ENSG00000164163	ABCE1	4:146019156-146050676	0.066627	0
CCOC	ENSG00000172795	DCP2	5:112312399-112357892	0.06666	0
CCOC	ENSG00000258659	TRIM34	11:5641174-5665628	0.066666	0
CCOC	ENSG00000196832	OR11G2	14:20665495-20666532	0.066718	0
CCOC	ENSG00000137077	CCL21	9:34709002-34710164	0.066779	0
CCOC	ENSG00000204220	PFDN6	6:33257374-33258711	0.066829	0
CCOC	ENSG00000130382	MLLT1	19:6210392-6279959	0.066843	0
CCOC	ENSG00000179695	OR6C2	12:55845998-55846936	0.066875	0
CCOC	ENSG00000143179	UCK2	1:165796732-165880855	0.06693	0
CCOC	ENSG00000184886	PIGW	17:34890849-34895217	0.066982	0
CCOC	ENSG00000145287	PLAC8	4:84011201-84035911	0.066993	0
CCOC	ENSG00000182568	SATB1	3:18389133-18480265	0.067	0
CCOC	ENSG00000123066	MED13L	12:116396381-116714991	0.067078	0
CCOC	ENSG00000205922	ONECUT3	19:1753662-1775444	0.06717	0
CCOC	ENSG00000143632	ACTA1	1:229566992-229569858	0.067287	0
CCOC	ENSG00000096872	IFT74	9:26947037-27062931	0.0673	0
CCOC	ENSG00000160345	C9orf116	9:138387026-138391761	0.067376	0
CCOC	ENSG00000183072	NKX2-5	5:172659107-172662315	0.067394	0
CCOC	ENSG00000184344	GDF3	12:7842381-7848360	0.067425	0
CCOC	ENSG00000170442	KRT86	12:52642892-52702947	0.067434	0
CCOC	ENSG00000129757	CDKN1C	11:2904448-2907063	0.06744	0
CCOC	ENSG00000154640	BTG3	21:18965968-18985268	0.067521	0
CCOC	ENSG00000179750	APOBEC3B	22:39378352-39388784	0.067533	0
CCOC	ENSG00000181896	ZNF101	19:19778962-19791735	0.067602	0
CCOC	ENSG00000166507	NDST2	10:75561669-75571589	0.067659	0
CCOC	ENSG00000165646	SLC18A2	10:119000584-119038941	0.067739	0
CCOC	ENSG00000161277	THAP8	19:36525886-36545664	0.067772	0
CCOC	ENSG00000111669	TPI1	12:6976288-6980110	0.067794	0
CCOC	ENSG00000004838	ZMYND10	3:50378537-50383459	0.067829	0
CCOC	ENSG00000132361	CLUH	17:2592680-2615053	0.067878	0
CCOC	ENSG00000159496	RGL4	22:24033048-24041444	0.067908	0
CCOC	ENSG00000031823	RANBP3	19:5916150-5978320	0.067943	0
CCOC	ENSG00000181092	ADIPOQ	3:186560463-186576252	0.067966	0
CCOC	ENSG00000103226	NOMO3	16:16326389-16388668	0.06797	0
CCOC	ENSG00000156575	PRG3	11:57144242-57148623	0.067973	0
CCOC	ENSG00000128815	WDFY4	10:49892907-50191001	0.067985	0
CCOC	ENSG00000205629	LCMT1	16:25123047-25189551	0.068068	0
CCOC	ENSG00000108932	SLC16A6	17:66263167-66287405	0.068069	0
CCOC	ENSG00000129103	SUMF2	7:56131700-56148365	0.068201	0
CCOC	ENSG00000108231	LGI1	10:95517566-95557916	0.068234	0
CCOC	ENSG00000198551	ZNF627	19:11708235-11729974	0.068235	0
CCOC	ENSG00000061936	SFSWAP	12:132195632-132284283	0.068293	0
CCOC	ENSG00000168283	BMI1	10:22610139-22620414	0.068329	0
CCOC	ENSG00000244242	IFITM10	11:1753640-1771824	0.068333	0
CCOC	ENSG00000102109	PCSK1N	X:48689504-48694036	0.068341	0
CCOC	ENSG00000174992	ZG16	16:29789561-29792969	0.068474	0
CCOC	ENSG00000065970	FOXJ2	12:8185298-8208118	0.068481	0
CCOC	ENSG00000178814	OPLAH	8:145106167-145115584	0.068583	0
CCOC	ENSG00000204344	STK19	6:31938952-31949223	0.068601	0
CCOC	ENSG00000132698	RAB25	1:156030966-156040295	0.068645	0
CCOC	ENSG00000131634	TMEM204	16:1578742-1605581	0.06865	0
CCOC	ENSG00000131067	GGT7	20:33432523-33460661	0.068677	0
CCOC	ENSG00000065000	AP3D1	19:2100987-2151556	0.068699	0
CCOC	ENSG00000117868	ESYT2	7:158523688-158622729	0.068702	0
CCOC	ENSG00000134874	DZIP1	13:96230456-96296960	0.068714	0
CCOC	ENSG00000204424	LY6G6F	6:31674625-31678372	0.068723	0
CCOC	ENSG00000259332	ST20-MTHFS	15:80135889-80215448	0.068754	0
CCOC	ENSG00000168802	CHTF8	16:69151912-69166493	0.068779	0
CCOC	ENSG00000095110	NXPE1	11:114392423-114430580	0.068788	0
CCOC	ENSG00000179988	PSTK	10:124739556-124749906	0.068809	0
CCOC	ENSG00000188735	TMEM120B	12:122150658-122219974	0.068813	0
CCOC	ENSG00000136213	CHST12	7:2443195-2474242	0.068839	0
CCOC	ENSG00000170855	TRIAP1	12:120881764-120884215	0.068873	0
CCOC	ENSG00000103978	TMEM87A	15:42502726-42565797	0.068908	0
CCOC	ENSG00000139192	TAPBPL	12:6561177-6571488	0.068977	0
CCOC	ENSG00000110367	DDX6	11:118618472-118661972	0.06899	0
CCOC	ENSG00000091527	CDV3	3:133292434-133309118	0.069001	0
CCOC	ENSG00000189339	SLC35E2B	1:1591486-1624243	0.06903	0
CCOC	ENSG00000165732	DDX21	10:70715879-70744825	0.069121	0
CCOC	ENSG00000145246	ATP10D	4:47487296-47595503	0.069138	0
CCOC	ENSG00000134243	SORT1	1:109852187-109940563	0.069182	0
CCOC	ENSG00000167858	TEKT1	17:6703300-6735077	0.069389	0
CCOC	ENSG00000188175	HEPACAM2	7:92817899-92855783	0.06943	0
CCOC	ENSG00000174469	CNTNAP2	7:145813453-148118090	0.069435	0
CCOC	ENSG00000158571	PFKFB1	X:54959307-55025244	0.069446	0
CCOC	ENSG00000102802	MEDAG	13:31480312-31499709	0.069586	0
CCOC	ENSG00000171860	C3AR1	12:8210919-8218955	0.069598	0
CCOC	ENSG00000255529	POLR2M	15:57998901-58009753	0.06961	0
CCOC	ENSG00000054118	THRAP3	1:36690017-36770958	0.069647	0
CCOC	ENSG00000182676	PPP1R27	17:79791368-79792926	0.069766	0
CCOC	ENSG00000103245	NARFL	16:779753-790997	0.069801	0
CCOC	ENSG00000197858	GPAA1	8:145137064-145141119	0.069817	0
CCOC	ENSG00000159915	ZNF233	19:44764033-44779470	0.069863	0
CCOC	ENSG00000174485	DENND4A	15:65952954-66084631	0.069893	0
CCOC	ENSG00000198814	GK	X:30671476-30749579	0.069897	0
CCOC	ENSG00000072778	ACADVL	17:7120444-7128586	0.069909	0
CCOC	ENSG00000065413	ANKRD44	2:197831741-198175521	0.069923	0
CCOC	ENSG00000099889	ARVCF	22:19954126-20004325	0.069951	0
CCOC	ENSG00000100360	IFT27	22:37154246-37172177	0.06998	0
CCOC	ENSG00000221823	PPP3R1	2:68405979-68483392	0.070011	0
CCOC	ENSG00000117360	PRPF3	1:150293928-150325704	0.070145	0
CCOC	ENSG00000147223	RIPPLY1	X:106143293-106146561	0.070402	0
CCOC	ENSG00000108984	MAP2K6	17:67410838-67538470	0.070414	0
CCOC	ENSG00000213937	CLDN9	16:3062457-3064506	0.070473	0
CCOC	ENSG00000106571	GLI3	7:42000547-42277469	0.070497	0
CCOC	ENSG00000165512	ZNF22	10:45496273-45500777	0.070592	0
CCOC	ENSG00000010292	NCAPD2	12:6602547-6641132	0.070664	0
CCOC	ENSG00000126861	OMG	17:29621668-29624380	0.070676	0
CCOC	ENSG00000065154	OAT	10:126085872-126107545	0.070751	0
CCOC	ENSG00000163833	FBXO40	3:121312170-121349139	0.07086	0
CCOC	ENSG00000178802	MPI	15:75182377-75190581	0.070867	0
CCOC	ENSG00000146904	EPHA1	7:143088205-143105985	0.070899	0
CCOC	ENSG00000130045	NXNL2	9:91149203-91190704	0.07095	0
CCOC	ENSG00000135077	HAVCR2	5:156512843-156536248	0.070994	0
CCOC	ENSG00000117362	APH1A	1:150237799-150241609	0.070995	0
CCOC	ENSG00000092607	TBX15	1:119425666-119532179	0.071002	0
CCOC	ENSG00000197312	DDI2	1:15943953-15995539	0.07102	0
CCOC	ENSG00000185722	ANKFY1	17:4066665-4167274	0.071059	0
CCOC	ENSG00000142544	CTU1	19:51600863-51611647	0.07107	0
CCOC	ENSG00000088832	FKBP1A	20:1349621-1373816	0.071086	0
CCOC	ENSG00000158104	HPD	12:122277433-122326517	0.071112	0
CCOC	ENSG00000162598	C1orf87	1:60456066-60539442	0.071117	0
CCOC	ENSG00000184258	CDR1	X:139865425-139866723	0.071221	0
CCOC	ENSG00000140015	KCNH5	14:63173291-63511956	0.071238	0
CCOC	ENSG00000167005	NUDT21	16:56463048-56485261	0.071249	0
CCOC	ENSG00000164687	FABP5	8:82192718-82197012	0.07129	0
CCOC	ENSG00000157388	CACNA1D	3:53529076-53847179	0.071366	0
CCOC	ENSG00000117479	SLC19A2	1:169433147-169455208	0.071379	0
CCOC	ENSG00000143458	GABPB2	1:151042784-151091007	0.071422	0
CCOC	ENSG00000231924	PSG1	19:43370613-43383921	0.071488	0
CCOC	ENSG00000137504	CREBZF	11:85368608-85376182	0.071564	0
CCOC	ENSG00000166266	CUL5	11:107879408-107978495	0.07162	0
CCOC	ENSG00000158882	TOMM40L	1:161195729-161200536	0.071624	0
CCOC	ENSG00000100083	GGA1	22:38004481-38029571	0.071656	0
CCOC	ENSG00000182230	FAM153B	5:175490712-175541801	0.071765	0
CCOC	ENSG00000148513	ANKRD30A	10:37414785-37521495	0.071831	0
CCOC	ENSG00000179094	PER1	17:8043788-8059723	0.071875	0
CCOC	ENSG00000214643	DEFB133	6:49913814-49917157	0.071883	0
CCOC	ENSG00000256162	SMLR1	6:131148545-131158275	0.072067	0
CCOC	ENSG00000135390	ATP5G2	12:54058944-54070512	0.072111	0
CCOC	ENSG00000173226	IQCB1	3:121488608-121553926	0.072115	0
CCOC	ENSG00000156453	PCDH1	5:141232655-141258361	0.072157	0
CCOC	ENSG00000256223	ZNF10	12:133707214-133736051	0.072279	0
CCOC	ENSG00000035862	TIMP2	17:76849059-76921472	0.072344	0
CCOC	ENSG00000129347	KRI1	19:10663761-10676702	0.072365	0
CCOC	ENSG00000204231	RXRB	6:33161362-33168630	0.072381	0
CCOC	ENSG00000072818	ACAP1	17:7239848-7254797	0.072395	0
CCOC	ENSG00000130313	PGLS	19:17622278-17632097	0.072543	0
CCOC	ENSG00000186765	FSCN2	17:79481022-79504156	0.072631	0
CCOC	ENSG00000109625	CPZ	4:8594387-8621488	0.072725	0
CCOC	ENSG00000164164	OTUD4	4:146054802-146101768	0.072768	0
CCOC	ENSG00000102890	ELMO3	16:67233014-67237932	0.072769	0
CCOC	ENSG00000182446	NPLOC4	17:79523913-79604138	0.072797	0
CCOC	ENSG00000197172	MAGEA6	X:151867245-151870814	0.072811	0
CCOC	ENSG00000143954	REG3G	2:79252812-79255630	0.072888	0
CCOC	ENSG00000127995	CASD1	7:94138838-94186331	0.072908	0
CCOC	ENSG00000161594	KLHL10	17:39992572-40004599	0.073014	0
CCOC	ENSG00000214022	REPIN1	7:150065361-150071133	0.073023	0
CCOC	ENSG00000142856	ITGB3BP	1:63906441-63988944	0.073025	0
CCOC	ENSG00000127329	PTPRB	12:70910630-71031220	0.07307	0
CCOC	ENSG00000183690	EFHC2	X:44005549-44202923	0.073149	0
CCOC	ENSG00000110344	UBE4A	11:118230296-118269926	0.073159	0
CCOC	ENSG00000086666	ZFAND6	15:80351910-80430735	0.073178	0
CCOC	ENSG00000105146	AURKC	19:57741750-57746916	0.073182	0
CCOC	ENSG00000104885	DOT1L	19:2164148-2232577	0.0732	0
CCOC	ENSG00000158555	GDPD5	11:75145683-75236991	0.073234	0
CCOC	ENSG00000183117	CSMD1	8:2792875-4852328	0.073318	0
CCOC	ENSG00000108010	GLRX3	10:131934639-131978646	0.073328	0
CCOC	ENSG00000132130	LHX1	17:35294772-35301915	0.073348	0
CCOC	ENSG00000072657	TRHDE	12:72666314-73059422	0.073403	0
CCOC	ENSG00000133134	BEX2	X:102564274-102565974	0.073421	0
CCOC	ENSG00000126705	AHDC1	1:27860756-27930463	0.073486	0
CCOC	ENSG00000148218	ALAD	9:116148592-116163618	0.073486	0
CCOC	ENSG00000136888	ATP6V1G1	9:117349994-117361152	0.073596	0
CCOC	ENSG00000179331	RAB39A	11:107799277-107834208	0.073613	0
CCOC	ENSG00000269058	CALR3	19:16589767-16607015	0.07365	0
CCOC	ENSG00000123609	NMI	2:152126982-152146430	0.073682	0
CCOC	ENSG00000112077	RHAG	6:49572888-49604587	0.073691	0
CCOC	ENSG00000159263	SIM2	21:38071991-38122510	0.073693	0
CCOC	ENSG00000235169	SMIM1	1:3689352-3692546	0.073717	0
CCOC	ENSG00000181072	CHRM2	7:136553399-136703720	0.073748	0
CCOC	ENSG00000212900	KRTAP3-2	17:39155445-39156138	0.073749	0
CCOC	ENSG00000033800	PIAS1	15:68346572-68483797	0.073758	0
CCOC	ENSG00000066583	ISOC1	5:128430442-128449721	0.073806	0
CCOC	ENSG00000130270	ATP8B3	19:1782074-1812275	0.074128	0
CCOC	ENSG00000130311	DDA1	19:17420337-17434107	0.074128	0
CCOC	ENSG00000157219	HTR5A	7:154862034-154879102	0.074131	0
CCOC	ENSG00000107562	CXCL12	10:44865601-44880545	0.074159	0
CCOC	ENSG00000178921	PFAS	17:8152596-8173809	0.074205	0
CCOC	ENSG00000165762	OR4K2	14:20344427-20345371	0.074271	0
CCOC	ENSG00000164111	ANXA5	4:122589152-122618147	0.074286	0
CCOC	ENSG00000125375	ATP5S	14:50778256-50802359	0.074305	0
CCOC	ENSG00000167555	ZNF528	19:52900771-52921661	0.0744	0
CCOC	ENSG00000144233	AMMECR1L	2:128619204-128643635	0.074443	0
CCOC	ENSG00000186867	QRFPR	4:122249797-122302181	0.074458	0
CCOC	ENSG00000133962	CATSPERB	14:92046728-92198413	0.07446	0
CCOC	ENSG00000187164	KIAA1598	10:118642888-118886097	0.07469	0
CCOC	ENSG00000107611	CUBN	10:16865965-17171816	0.074705	0
CCOC	ENSG00000144848	ATG3	3:112251354-112280810	0.074705	0
CCOC	ENSG00000174898	CATSPERD	19:5720688-5778742	0.074746	0
CCOC	ENSG00000169313	P2RY12	3:151054631-151102600	0.074822	0
CCOC	ENSG00000085377	PREP	6:105725442-105850999	0.074854	0
CCOC	ENSG00000102119	EMD	X:153607597-153609883	0.074897	0
CCOC	ENSG00000172638	EFEMP2	11:65633912-65640405	0.074958	0
CCOC	ENSG00000183571	PGPEP1L	15:99511459-99551024	0.074958	0
CCOC	ENSG00000083520	DIS3	13:73329540-73356344	0.075012	0
CCOC	ENSG00000230453	ANKRD18B	9:33524347-33602658	0.075014	0
CCOC	ENSG00000119772	DNMT3A	2:25451421-25565459	0.075028	0
CCOC	ENSG00000090263	MRPS33	7:140705961-140714781	0.075037	0
CCOC	ENSG00000129654	FOXJ1	17:74132414-74137380	0.07505	0
CCOC	ENSG00000167094	TTC16	9:130478358-130493879	0.075053	0
CCOC	ENSG00000182271	TMIGD1	17:28643351-28661065	0.075075	0
CCOC	ENSG00000189030	VHLL	1:156268415-156269428	0.075083	0
CCOC	ENSG00000133106	EPSTI1	13:43460524-43566407	0.075087	0
CCOC	ENSG00000134245	WNT2B	1:113010040-113063910	0.075143	0
CCOC	ENSG00000134569	LRP4	11:46878268-46940173	0.075169	0
CCOC	ENSG00000057593	F7	13:113760102-113774995	0.075173	0
CCOC	ENSG00000111199	TRPV4	12:110220892-110271212	0.0752	0
CCOC	ENSG00000174574	AKIRIN1	1:39456916-39471737	0.075233	0
CCOC	ENSG00000174562	KLK15	19:51328545-51334779	0.075248	0
CCOC	ENSG00000186814	ZSCAN30	18:32831023-32870196	0.075249	0
CCOC	ENSG00000137843	PAK6	15:40509629-40569688	0.07528	0
CCOC	ENSG00000079335	CDC14A	1:100810598-100985833	0.075301	0
CCOC	ENSG00000133980	VRTN	14:74815166-74826711	0.075324	0
CCOC	ENSG00000132024	CC2D1A	19:14016956-14041693	0.075372	0
CCOC	ENSG00000135148	TRAFD1	12:112563349-112591408	0.075413	0
CCOC	ENSG00000138185	ENTPD1	10:97471536-97637023	0.075464	0
CCOC	ENSG00000157916	RER1	1:2323214-2336883	0.075472	0
CCOC	ENSG00000151090	THRB	3:24158644-24536772	0.075495	0
CCOC	ENSG00000198088	NUP62CL	X:106366657-106449670	0.075517	0
CCOC	ENSG00000047849	MAP4	3:47892180-48130769	0.075614	0
CCOC	ENSG00000184923	NUTM2A	10:88983616-88995645	0.075626	0
CCOC	ENSG00000132535	DLG4	17:7093209-7123369	0.075657	0
CCOC	ENSG00000111052	LIN7A	12:81191171-81331702	0.075666	0
CCOC	ENSG00000147676	MAL2	8:120220610-120257913	0.075723	0
CCOC	ENSG00000102921	N4BP1	16:48572637-48644125	0.075809	0
CCOC	ENSG00000055957	ITIH1	3:52811602-52826084	0.075839	0
CCOC	ENSG00000180549	FUT7	9:139924626-139927292	0.07584	0
CCOC	ENSG00000198131	ZNF544	19:58739960-58788923	0.075841	0
CCOC	ENSG00000096060	FKBP5	6:35541362-35696360	0.075846	0
CCOC	ENSG00000170421	KRT8	12:53290971-53343650	0.075977	0
CCOC	ENSG00000188986	NELFB	9:140149759-140168000	0.076042	0
CCOC	ENSG00000231274	SBK3	19:56052023-56056909	0.076064	0
CCOC	ENSG00000161055	SCGB3A1	5:180017105-180018487	0.076082	0
CCOC	ENSG00000263417	GTSCR1	18:68297755-68318093	0.076128	0
CCOC	ENSG00000138100	TRIM54	2:27505297-27530307	0.076135	0
CCOC	ENSG00000141759	TXNL4A	18:77732867-77748546	0.076136	0
CCOC	ENSG00000158296	SLC13A3	20:45186462-45313124	0.07614	0
CCOC	ENSG00000068489	PRR11	17:57232860-57284070	0.076145	0
CCOC	ENSG00000074755	ZZEF1	17:3907739-4046314	0.076161	0
CCOC	ENSG00000157005	SST	3:187386694-187388201	0.076206	0
CCOC	ENSG00000224470	ATXN1L	16:71879894-71891236	0.076218	0
CCOC	ENSG00000110218	PANX1	11:93862094-93918762	0.076264	0
CCOC	ENSG00000203690	TCP10	6:167786577-167797998	0.07632	0
CCOC	ENSG00000163608	C3orf17	3:112721291-112738555	0.076358	0
CCOC	ENSG00000151474	FRMD4A	10:13685706-14372866	0.076399	0
CCOC	ENSG00000163219	ARHGAP25	2:68961913-69053965	0.076441	0
CCOC	ENSG00000167202	TBC1D2B	15:78287327-78369994	0.076442	0
CCOC	ENSG00000135519	KCNH3	12:49932834-49952091	0.076447	0
CCOC	ENSG00000136770	DNAJC1	10:22045477-22292679	0.076515	0
CCOC	ENSG00000178904	DPY19L3	19:32896655-32976799	0.076547	0
CCOC	ENSG00000159189	C1QC	1:22969969-22974603	0.076594	0
CCOC	ENSG00000133863	TEX15	8:30688939-30770512	0.076643	0
CCOC	ENSG00000196743	GM2A	5:150632613-150650083	0.076746	0
CCOC	ENSG00000106617	PRKAG2	7:151253200-151574316	0.076841	0
CCOC	ENSG00000124103	FAM209A	20:55099785-55101208	0.076859	0
CCOC	ENSG00000138382	METTL5	2:170668267-170681439	0.076874	0
CCOC	ENSG00000134954	ETS1	11:128328656-128457453	0.07697	0
CCOC	ENSG00000113595	TRIM23	5:64885507-64920187	0.077015	0
CCOC	ENSG00000144118	RALB	2:120997646-121052287	0.077073	0
CCOC	ENSG00000115163	CENPA	2:27008857-27023935	0.077173	0
CCOC	ENSG00000087206	UIMC1	5:176332006-176433795	0.077219	0
CCOC	ENSG00000134884	ARGLU1	13:107195662-107220514	0.077288	0
CCOC	ENSG00000103253	HAGHL	16:776958-779715	0.077303	0
CCOC	ENSG00000164124	TMEM144	4:159122749-159176439	0.07732	0
CCOC	ENSG00000213413	PVRIG	7:99816147-99819113	0.077335	0
CCOC	ENSG00000178586	OR6B3	2:240984494-240985489	0.07735	0
CCOC	ENSG00000156508	EEF1A1	6:74225473-74230755	0.077658	0
CCOC	ENSG00000172785	CBWD1	9:121038-179077	0.077666	0
CCOC	ENSG00000116833	NR5A2	1:199996730-200146552	0.077677	0
CCOC	ENSG00000130772	MED18	1:28655513-28662478	0.077687	0
CCOC	ENSG00000147416	ATP6V1B2	8:20054704-20079207	0.077703	0
CCOC	ENSG00000136688	IL36G	2:113735596-113743249	0.077772	0
CCOC	ENSG00000152700	SAR1B	5:133936839-133968533	0.077785	0
CCOC	ENSG00000147526	TACC1	8:38585704-38710546	0.077813	0
CCOC	ENSG00000113240	CLK4	5:178029664-178054093	0.077834	0
CCOC	ENSG00000137877	SPTBN5	15:42140344-42186275	0.077864	0
CCOC	ENSG00000106125	FAM188B	7:30811033-30932408	0.077867	0
CCOC	ENSG00000174243	DDX23	12:49223539-49245957	0.077868	0
CCOC	ENSG00000148339	SLC25A25	9:130830479-130871537	0.077878	0
CCOC	ENSG00000180182	MED14	X:40508795-40595374	0.077907	0
CCOC	ENSG00000178568	ERBB4	2:212240442-213403879	0.077934	0
CCOC	ENSG00000206557	TRIM71	3:32859510-32933771	0.077934	0
CCOC	ENSG00000102145	GATA1	X:48644982-48652718	0.077985	0
CCOC	ENSG00000117984	CTSD	11:1773982-1785222	0.077993	0
CCOC	ENSG00000161911	TREML1	6:41116998-41122087	0.078013	0
CCOC	ENSG00000019102	VSIG2	11:124617370-124622109	0.078098	0
CCOC	ENSG00000104327	CALB1	8:91070836-91095107	0.078109	0
CCOC	ENSG00000164830	OXR1	8:107282406-107764922	0.07812	0
CCOC	ENSG00000196611	MMP1	11:102660641-102668966	0.078135	0
CCOC	ENSG00000172354	GNB2	7:100271363-100276792	0.078304	0
CCOC	ENSG00000164181	ELOVL7	5:60047616-60140101	0.078352	0
CCOC	ENSG00000269964	MEI4	6:78360302-78634476	0.078393	0
CCOC	ENSG00000186204	CYP4F12	19:15783567-15807984	0.078421	0
CCOC	ENSG00000138131	LOXL4	10:100007443-100028007	0.07854	0
CCOC	ENSG00000161031	PGLYRP2	19:15579456-15590315	0.078664	0
CCOC	ENSG00000163788	SNRK	3:43328004-43392635	0.078716	0
CCOC	ENSG00000256812	CAPNS2	16:55600584-55601592	0.078723	0
CCOC	ENSG00000154645	CHODL	21:19400190-19639687	0.078729	0
CCOC	ENSG00000176787	OR52E2	11:5079880-5080857	0.078849	0
CCOC	ENSG00000108784	NAGLU	17:40687951-40696467	0.078876	0
CCOC	ENSG00000151150	ANK3	10:61786056-62493284	0.078917	0
CCOC	ENSG00000137166	FOXP4	6:41514164-41570122	0.078934	0
CCOC	ENSG00000180354	MTURN	7:30174552-30202381	0.079049	0
CCOC	ENSG00000197077	KIAA1671	22:25348676-25593415	0.079129	0
CCOC	ENSG00000163032	VSNL1	2:17721807-17837706	0.079153	0
CCOC	ENSG00000146410	MTFR2	6:136552168-136571449	0.079169	0
CCOC	ENSG00000067533	RRP15	1:218458629-218511325	0.079272	0
CCOC	ENSG00000116128	BCL9	1:147013222-147098022	0.079287	0
CCOC	ENSG00000240303	ACAD11	3:132276982-132378975	0.079288	0
CCOC	ENSG00000122958	VPS26A	10:70883908-70932617	0.079313	0
CCOC	ENSG00000137960	GIPC2	1:78510646-78604129	0.079322	0
CCOC	ENSG00000141052	MYOCD	17:12569207-12672266	0.079323	0
CCOC	ENSG00000182645	CCDC172	10:118083940-118139541	0.079326	0
CCOC	ENSG00000179841	AKAP5	14:64932217-64941221	0.079339	0
CCOC	ENSG00000128000	ZNF780B	19:40534167-40562125	0.079377	0
CCOC	ENSG00000116745	RPE65	1:68894507-68915642	0.079399	0
CCOC	ENSG00000153250	RBMS1	2:161128662-161350366	0.079403	0
CCOC	ENSG00000120306	CYSTM1	5:139554653-139623374	0.079417	0
CCOC	ENSG00000188056	TREML4	6:41196062-41206120	0.079425	0
CCOC	ENSG00000132693	CRP	1:159682079-159684396	0.079484	0
CCOC	ENSG00000178172	SPINK6	5:147582357-147594700	0.079499	0
CCOC	ENSG00000186566	GPATCH8	17:42472645-42580957	0.079519	0
CCOC	ENSG00000260916	CCPG1	15:55647421-55700708	0.079653	0
CCOC	ENSG00000203923	SPANXN1	X:144329107-144337728	0.079658	0
CCOC	ENSG00000240583	AQP1	7:30951415-30965131	0.079752	0
CCOC	ENSG00000076356	PLXNA2	1:208195587-208417665	0.079754	0
CCOC	ENSG00000177414	UBE2U	1:64669135-64732969	0.07981	0
CCOC	ENSG00000107147	KCNT1	9:138594031-138684993	0.079877	0
CCOC	ENSG00000168785	TSPAN5	4:99391518-99579812	0.079909	0
CCOC	ENSG00000116132	PRRX1	1:170633313-170708541	0.079937	0
CCOC	ENSG00000177565	TBL1XR1	3:176738542-176915048	0.080035	0
CCOC	ENSG00000107951	MTPAP	10:30598730-30638267	0.080051	0
CCOC	ENSG00000118900	UBN1	16:4896666-4932363	0.080087	0
CCOC	ENSG00000167183	PRR15L	17:46029333-46035252	0.080245	0
CCOC	ENSG00000167962	ZNF598	16:2047653-2059822	0.080263	0
CCOC	ENSG00000164187	LMBRD2	5:36103414-36152015	0.080341	0
CCOC	ENSG00000160218	TRAPPC10	21:45432206-45526433	0.080371	0
CCOC	ENSG00000081479	LRP2	2:169983619-170219123	0.080412	0
CCOC	ENSG00000133027	PEMT	17:17408877-17495434	0.080531	0
CCOC	ENSG00000147324	MFHAS1	8:8640864-8751131	0.080621	0
CCOC	ENSG00000137070	IL11RA	9:34652182-34661899	0.080724	0
CCOC	ENSG00000132688	NES	1:156638555-156647189	0.08081	0
CCOC	ENSG00000108602	ALDH3A1	17:19641297-19651746	0.080812	0
CCOC	ENSG00000166233	ARIH1	15:72766667-72878904	0.080917	0
CCOC	ENSG00000152147	GEMIN6	2:39005327-39009598	0.081025	0
CCOC	ENSG00000134343	ANO3	11:26210458-26684836	0.0812	0
CCOC	ENSG00000135622	SEMA4F	2:74881355-74910981	0.081245	0
CCOC	ENSG00000105373	GLTSCR2	19:48248793-48260323	0.081269	0
[truncated: 108,797 more rows]
