# Supplementary material for: chromMAGMA: regulatory element-centric interrogation of risk variants
Source: Life Sci Alliance. 2022 Jul 1;5(10):e202201446. doi: 10.26508/lsa.202201446 (PMC9251535; doi:10.26508/lsa.202201446)
Supplement: Supplementary file 8 [file LSA-2022-01446_TableS8.xlsx]

## Sheet: ST8
GWAS	FEATURE	ensembl_gene_id	TF	MsigdB_NAME	SIZE	ES	NES	P-Value	FDR q-Value	NES rank (GWASxFEATURE)
NMOC	chromMAGMA	ENSG00000125618	PAX8	PAX8_B	91	0.542045	1.83718	0	0.0210053	1
CCOC	chromMAGMA	ENSG00000231924	SP1	SP1_Q6_01	235	0.375117	1.51942	0	0.0712509	9
CCOC	chromMAGMA	NA	NA	AP2GAMMA_01	237	0.379372	1.53616	0	0.0757701	7
CCOC	chromMAGMA	NA	NA	LXR_DR4_Q3	87	0.4077	1.54293	0	0.0799088	6
EnOC	chromMAGMA	ENSG00000156925	ZIC3	ZIC3_01	240	0.399438	1.63087	0	0.080048	2
CCOC	chromMAGMA	ENSG00000122034	AP2	AP2_Q6_01	254	0.344174	1.40359	0	0.0818127	32
CCOC	chromMAGMA	NA	NA	E2F_Q3_01	218	0.349213	1.39843	0	0.0818183	34
CCOC	chromMAGMA	ENSG00000122861	ATF	ATF_01	241	0.349444	1.41153	0	0.0833185	29
CCOC	chromMAGMA	ENSG00000101412	E2F1	E2F1_Q6	218	0.371442	1.49908	0	0.0845018	10
HGSOC	chromMAGMA	ENSG00000125618	PAX8	PAX8_B	91	0.497761	1.7034	0	0.115052	1
CCOC	chromMAGMA	NA	NA	E2F_Q6	216	0.361824	1.45198	0	0.087606	17
MOC	chromMAGMA	NA	NA	E2F_Q6	216	0.36692	1.45053	0	0.0877746	17
MOC	chromMAGMA	ENSG00000231924	SP1	SP1_01	227	0.365627	1.43977	0	0.0878395	19
CCOC	chromMAGMA	NA	NA	SGCGSSAAA_E2F1DP2_01	155	0.367047	1.45664	0	0.0881497	16
CCOC	chromMAGMA	ENSG00000157557	ETS2	ETS2_B	266	0.339806	1.37876	0	0.0896753	40
CCOC	chromMAGMA	ENSG00000120690	ELF1	ELF1_Q6	231	0.354024	1.42721	0	0.0908947	22
CCOC	chromMAGMA	NA	NA	E2F1DP1RB_01	216	0.349371	1.41339	0	0.0912413	26
CCOC	chromMAGMA	NA	NA	GCGNNANTTCC_UNKNOWN	123	0.374879	1.45867	0	0.0916293	15
MOC	chromMAGMA	NA	NA	GABP_B	259	0.367883	1.45199	0	0.0917619	16
CCOC	chromMAGMA	NA	NA	E2F_Q6_01	219	0.338756	1.37879	0	0.0919235	39
CCOC	chromMAGMA	ENSG00000178573	MAF	MAF_Q6	244	0.343029	1.38718	0	0.0919823	35
EnOC	chromMAGMA	NA	NA	GGAMTNNNNNTCCY_UNKNOWN	108	0.387599	1.49797	0	0.0921654	9
MOC	chromMAGMA	NA	NA	E2F_Q4	219	0.362671	1.42395	0	0.0922962	22
LGSOC	chromMAGMA	NA	NA	YRTCANNRCGC_UNKNOWN	61	0.45573	1.63146	0	0.0760454	2
CCOC	chromMAGMA	NA	NA	CETS1P54_01	254	0.365422	1.48322	0	0.0924381	11
CCOC	chromMAGMA	ENSG00000089558	ELK1	ELK1_01	260	0.352141	1.4334	0	0.0932424	20
CCOC	chromMAGMA	ENSG00000231924	SP1	SP1_Q4_01	243	0.36117	1.46282	0	0.093394	14
CCOC	chromMAGMA	ENSG00000104689	TNFRSF10A	DR4_Q2	248	0.354351	1.43632	0	0.0947853	19
CCOC	chromMAGMA	ENSG00000118513	MYB	MYB_Q3	233	0.337802	1.37228	0	0.0957224	41
MOC	chromMAGMA	ENSG00000152977	ZIC1	ZIC1_01	243	0.359766	1.42437	0	0.0961682	21
CCOC	chromMAGMA	NA	NA	E2F_Q4_01	220	0.340372	1.37008	0	0.0963686	42
CCOC	MAGMA	ENSG00000125482	TTF1	TTF1_Q6	250	0.440232	1.25058	0	0.395556	15
MOC	chromMAGMA	ENSG00000231924	SP1	SP1_Q2_01	236	0.369621	1.45708	0	0.0981637	14
EnOC	chromMAGMA	ENSG00000154727	NRF2	NRF2_01	262	0.35305	1.44377	0	0.0986202	16
EnOC	chromMAGMA	NA	NA	LFA1_Q6	236	0.358332	1.45212	0	0.102489	14
CCOC	chromMAGMA	ENSG00000231924	SP1	SP1_Q6	245	0.362044	1.46734	0	0.102717	12
EnOC	chromMAGMA	ENSG00000118922	AP2REP	AP2REP_01	166	0.36753	1.45882	0	0.10306	13
EnOC	chromMAGMA	ENSG00000115415	STAT1	STAT1_02	242	0.361429	1.47198	0	0.104605	11
MOC	chromMAGMA	ENSG00000167825	OLF1	OLF1_01	248	0.369313	1.4648	0	0.105535	12
CCOC	chromMAGMA	ENSG00000106459	NRF1	NRF1_Q6	248	0.328161	1.33575	0	0.105621	61
EnOC	chromMAGMA	ENSG00000043355	ZIC2	ZIC2_01	234	0.373123	1.50732	0	0.106207	7
EnOC	chromMAGMA	ENSG00000100644	HIF1A	HIF1_Q5	231	0.358527	1.46293	0	0.106645	12
NMOC	chromMAGMA	NA	NA	CACBINDINGPROTEIN_Q6	236	0.405927	1.45872	0	0.209714	8
NMOC	chromMAGMA	ENSG00000099326	MZF1	MZF1_01	225	0.407652	1.45652	0	0.191082	9
EnOC	chromMAGMA	ENSG00000134954	ETS1	ETS1_B	249	0.336506	1.38025	0	0.108123	33
CCOC	chromMAGMA	NA	NA	AP2ALPHA_01	226	0.389341	1.57031	0	0.108536	3
CCOC	chromMAGMA	ENSG00000100726	TELO2	TEL2_Q6	229	0.332408	1.34309	0	0.108547	54
LGSOC	chromMAGMA	NA	NA	NFMUE1_Q6	234	0.400618	1.58474	0	0.0923915	3
EnOC	chromMAGMA	NA	NA	SMAD_Q6	240	0.344861	1.40732	0	0.109933	23
EnOC	chromMAGMA	ENSG00000231924	SP1	SP1_Q6_01	235	0.340626	1.38087	0	0.110658	32
EnOC	chromMAGMA	ENSG00000100726	TELO2	TEL2_Q6	229	0.343045	1.39132	0	0.114399	27
EnOC	chromMAGMA	ENSG00000100105	MAZR	MAZR_01	209	0.377484	1.52822	0	0.114667	5
HGSOC	MAGMA	ENSG00000186951	PPARA	PPARA_01	34	0.687121	1.65286	0.001	0.0530105	1
EnOC	chromMAGMA	NA	NA	GCCATNTTG_YY1_Q6	415	0.33136	1.38282	0	0.115267	30
MOC	chromMAGMA	NA	NA	TFIII_Q6	193	0.389508	1.52564	0	0.116853	5
EnOC	chromMAGMA	ENSG00000231924	SP1	SP1_Q2_01	236	0.337521	1.36691	0	0.117569	36
CCOC	chromMAGMA	NA	NA	E2F_01	61	0.453016	1.6538	0	0.119853	1
MOC	chromMAGMA	ENSG00000101412	E2F1	E2F1_Q6_01	226	0.352433	1.39905	0	0.120202	23
EnOC	chromMAGMA	ENSG00000141646	SMAD4	SMAD4_Q6	224	0.372218	1.50762	0	0.123408	6
NMOC	MAGMA	ENSG00000091831	ESR1	ER_Q6_01	262	0.495869	1.29894	0	0.299031	12
EnOC	chromMAGMA	NA	NA	NFKAPPAB65_01	229	0.350595	1.42025	0	0.125426	17
CCOC	chromMAGMA	NA	NA	GCCATNTTG_YY1_Q6	415	0.318665	1.31484	0	0.125626	68
NMOC	chromMAGMA	ENSG00000164299	SPZ1	SPZ1_01	221	0.401764	1.4395	0	0.159758	13
NMOC	MAGMA	ENSG00000164299	SPZ1	SPZ1_01	227	0.497911	1.29794	0	0.280491	13
NMOC	MAGMA	ENSG00000180318	ALX1	CART1_01	215	0.49629	1.29325	0	0.279172	14
EnOC	chromMAGMA	ENSG00000089558	ELK1	ELK1_01	260	0.332975	1.35822	0	0.128183	37
NMOC	chromMAGMA	NA	NA	NFY_C	223	0.401013	1.43934	0	0.148847	14
LGSOC	chromMAGMA	ENSG00000072310	SREBP1	SREBP1_02	82	0.415781	1.52384	0	0.143342	4
MOC	chromMAGMA	NA	NA	SMTTTTGT_UNKNOWN	369	0.329561	1.33196	0	0.130355	51
MOC	chromMAGMA	ENSG00000106331	PAX4	PAX4_01	246	0.335456	1.32931	0	0.1324	52
MOC	chromMAGMA	ENSG00000138795	LEF1	LEF1_Q6	242	0.339447	1.33326	0	0.133189	49
MOC	chromMAGMA	NA	NA	GCCATNTTG_YY1_Q6	415	0.331914	1.34637	0	0.13367	41
EnOC	chromMAGMA	NA	NA	WTTGKCTG_UNKNOWN	471	0.317001	1.3257	0	0.135818	53
MOC	chromMAGMA	NA	NA	AP1FJ_Q2	252	0.339713	1.34856	0	0.13612	39
NMOC	chromMAGMA	ENSG00000154727	NRF2	NRF2_01	262	0.391813	1.41506	0	0.14622	19
NMOC	chromMAGMA	NA	NA	CMYB_01	240	0.389874	1.39615	0	0.145354	24
MOC	chromMAGMA	NA	NA	E2F1DP1RB_01	216	0.386815	1.52687	0	0.144568	4
NMOC	chromMAGMA	ENSG00000185811	LYF1	LYF1_01	247	0.385916	1.38613	0	0.145321	27
HGSOC	MAGMA	NA	NA	MYOGNF1_01	46	0.614584	1.52063	0.002	0.124026	2
NMOC	chromMAGMA	ENSG00000106331	PAX4	PAX4_04	199	0.385541	1.37174	0	0.150968	31
LGSOC	chromMAGMA	ENSG00000072310	SREBP1	SREBP1_01	156	0.371325	1.4316	0	0.168192	11
NMOC	chromMAGMA	ENSG00000156925	ZIC3	ZIC3_01	240	0.379492	1.36397	0	0.151094	34
LGSOC	chromMAGMA	ENSG00000126561	STAT5A	STAT5A_02	129	0.37255	1.41726	0	0.156955	14
LGSOC	chromMAGMA	NA	NA	MYCMAX_02	250	0.34837	1.38086	0	0.18448	19
LGSOC	chromMAGMA	ENSG00000106331	PAX4	PAX4_03	238	0.344018	1.36698	0	0.167662	25
HGSOC	chromMAGMA	NA	NA	MYOGNF1_01	42	0.499077	1.58482	0.012012	0.232612	2
HGSOC	chromMAGMA	ENSG00000099326	MZF1	MZF1_01	225	0.436442	1.57586	0	0.17075	3
LGSOC	chromMAGMA	ENSG00000106331	PAX4	PAX4_01	246	0.346139	1.36585	0	0.16383	26
HGSOC	MAGMA	NA	NA	TNCATNTCCYR_UNKNOWN	127	0.522411	1.35524	0.001	0.638786	3
LGSOC	chromMAGMA	ENSG00000198081	ZF5	ZF5_01	225	0.344654	1.35735	0	0.148246	32
HGSOC	chromMAGMA	ENSG00000072310	SREBP1	SREBP1_02	82	0.448108	1.53997	0.003	0.194343	4
LGSOC	chromMAGMA	NA	NA	MYCMAX_B	255	0.336013	1.33205	0	0.159024	41
HGSOC	MAGMA	NA	NA	HOX13_01	43	0.55447	1.34826	0.032	0.528348	4
HGSOC	MAGMA	ENSG00000180318	ALX1	CART1_01	215	0.510552	1.33885	0	0.479287	5
HGSOC	chromMAGMA	ENSG00000106546	AHR	AHR_01	53	0.468072	1.51996	0.008	0.194299	5
CCOC	MAGMA	NA	NA	CACBINDINGPROTEIN_Q6	238	0.460548	1.30238	0	0.523311	5
MOC	MAGMA	ENSG00000101076	HNF4	HNF4_01_B	242	0.46874	1.30843	0	0.498889	5
HGSOC	chromMAGMA	NA	NA	KCCGNSWTTT_UNKNOWN	102	0.438676	1.51312	0.002	0.174253	6
EnOC	MAGMA	NA	NA	GGGNNTTTCC_NFKB_Q6_01	131	0.479583	1.31898	0	0.633451	3
LGSOC	MAGMA	NA	NA	GTCNYYATGR_UNKNOWN	108	0.533864	1.41878	0	0.449076	1
MOC	MAGMA	NA	NA	MEIS1AHOXA9_01	114	0.490349	1.32818	0	0.613115	3
CCOC	MAGMA	ENSG00000115297	NCX	NCX_01	171	0.467946	1.3142	0	1	2
CCOC	chromMAGMA	NA	NA	YWATTWNNRGCT_UNKNOWN	66	0.418894	1.53092	0.001	0.0702949	8
LGSOC	chromMAGMA	ENSG00000106546	AHR	AHR_01	53	0.475996	1.65615	0.001	0.109059	1
CCOC	chromMAGMA	NA	NA	LFA1_Q6	236	0.347649	1.40992	0.001	0.0818731	30
CCOC	chromMAGMA	ENSG00000104783	IK1	IK1_01	257	0.355772	1.45144	0.001	0.0830166	18
CCOC	chromMAGMA	NA	NA	ETS_Q4	236	0.344942	1.4041	0.001	0.0841296	31
CCOC	chromMAGMA	NA	NA	E2F_Q4	219	0.349921	1.41302	0.001	0.0880101	27
MOC	chromMAGMA	NA	NA	RGTTAMWNATT_HNF1_01	66	0.447881	1.61157	0.001	0.0973751	2
EnOC	chromMAGMA	NA	NA	GABP_B	259	0.356982	1.44995	0.001	0.0974568	15
EnOC	chromMAGMA	ENSG00000168610	STAT3	STAT3_02	138	0.359162	1.40579	0.001	0.10302	25
EnOC	chromMAGMA	NA	NA	RACTNNRTTTNC_UNKNOWN	113	0.388126	1.49838	0.001	0.103186	8
CCOC	chromMAGMA	ENSG00000072310	SREBP1	SREBP1_Q6	235	0.337161	1.35811	0.001	0.103298	46
CCOC	chromMAGMA	NA	NA	E2F_02	221	0.335389	1.35483	0.001	0.103844	48
CCOC	chromMAGMA	NA	NA	E2F1DP1_01	220	0.335908	1.35599	0.001	0.104587	47
CCOC	chromMAGMA	ENSG00000101412	E2F1	E2F1_Q4	231	0.330481	1.34035	0.001	0.106619	57
CCOC	chromMAGMA	ENSG00000134954	ETS1	ETS1_B	249	0.33367	1.34144	0.001	0.1069	56
CCOC	chromMAGMA	NA	NA	NFMUE1_Q6	234	0.331357	1.3379	0.001	0.108002	58
EnOC	chromMAGMA	ENSG00000137309	HMGIY	HMGIY_Q6	231	0.338058	1.37413	0.001	0.112977	34
NMOC	MAGMA	ENSG00000108091	TST1	TST1_01	242	0.500701	1.30854	0.001	0.313733	10
MOC	chromMAGMA	ENSG00000117505	DR1	DR1_Q3	235	0.35445	1.39229	0.001	0.119895	25
MOC	chromMAGMA	ENSG00000101412	E2F1	E2F1_Q6	218	0.35284	1.3947	0.001	0.121685	24
NMOC	chromMAGMA	ENSG00000085276	MECOM	EVI1_05	159	0.410386	1.44175	0.001	0.169237	12
EnOC	chromMAGMA	ENSG00000231924	SP1	SP1_Q6	245	0.334904	1.35574	0.001	0.125869	39
EnOC	chromMAGMA	NA	NA	AP2ALPHA_01	226	0.333626	1.34569	0.001	0.126233	44
MOC	chromMAGMA	NA	NA	E2F_Q6_01	219	0.342145	1.34279	0.001	0.127648	45
EnOC	chromMAGMA	NA	NA	AP2GAMMA_01	237	0.331876	1.34635	0.001	0.128169	43
MOC	chromMAGMA	ENSG00000198081	ZF5	ZF5_01	225	0.346471	1.3728	0.001	0.132669	29
MOC	chromMAGMA	NA	NA	SGCGSSAAA_E2F1DP2_01	155	0.385077	1.49022	0.001	0.13269	7
MOC	chromMAGMA	NA	NA	E2F1DP1_01	220	0.345261	1.36232	0.001	0.13381	33
NMOC	chromMAGMA	ENSG00000043355	ZIC2	ZIC2_01	234	0.392389	1.41844	0.001	0.156655	17
MOC	chromMAGMA	ENSG00000169083	AR	AR_Q6	234	0.332084	1.32198	0.001	0.135642	56
NMOC	chromMAGMA	NA	NA	AML_Q6	244	0.390906	1.41558	0.001	0.152954	18
MOC	chromMAGMA	NA	NA	E2F1DP2_01	220	0.345261	1.365	0.001	0.137835	31
MOC	chromMAGMA	ENSG00000101412	E2F1	E2F1_Q3	228	0.344215	1.3488	0.001	0.139307	38
NMOC	chromMAGMA	ENSG00000143190	POU2F1	OCT1_04	203	0.394372	1.40751	0.001	0.137603	22
NMOC	MAGMA	NA	NA	AML_Q6	250	0.475668	1.24607	0.001	0.33283	24
NMOC	chromMAGMA	ENSG00000108091	TST1	TST1_01	229	0.386003	1.38596	0.001	0.140703	28
CCOC	MAGMA	NA	NA	RTTTNNNYTGGM_UNKNOWN	151	0.463769	1.29895	0.001	0.458265	6
EnOC	chromMAGMA	NA	NA	SMTTTTGT_UNKNOWN	369	0.318778	1.31216	0.001	0.147257	59
NMOC	chromMAGMA	ENSG00000118260	CREB	CREB_Q3	234	0.377091	1.35962	0.001	0.151565	36
NMOC	chromMAGMA	ENSG00000106459	NRF1	NRF1_Q6	248	0.371741	1.34286	0.001	0.149132	45
NMOC	chromMAGMA	NA	NA	NFY_Q6	230	0.371187	1.33812	0.001	0.144227	49
EnOC	MAGMA	ENSG00000172216	CEBPB	CEBPB_02	256	0.442068	1.24537	0.001	0.611302	10
LGSOC	chromMAGMA	ENSG00000118217	ATF6	ATF6_01	114	0.366916	1.37892	0.001	0.17139	21
HGSOC	MAGMA	NA	NA	RGTTAMWNATT_HNF1_01	70	0.533442	1.33298	0.016	0.432414	6
LGSOC	chromMAGMA	ENSG00000134323	NMYC	NMYC_01	262	0.344245	1.36025	0.001	0.152592	30
EnOC	chromMAGMA	ENSG00000122034	AP2	AP2_Q6_01	254	0.316794	1.2799	0.001	0.167299	80
HGSOC	MAGMA	ENSG00000085276	MECOM	EVI1_05	169	0.514154	1.33129	0.001	0.380356	7
LGSOC	chromMAGMA	NA	NA	GCCATNTTG_YY1_Q6	415	0.333135	1.34127	0.001	0.144863	40
HGSOC	chromMAGMA	ENSG00000186951	PPARA	PPARA_01	33	0.482456	1.49116	0.0281407	0.19238	7
HGSOC	chromMAGMA	NA	NA	YAATNRNNNYNATT_UNKNOWN	91	0.429842	1.47652	0.009	0.198347	8
LGSOC	chromMAGMA	ENSG00000100726	TELO2	TEL2_Q6	229	0.334852	1.31046	0.001	0.186411	47
HGSOC	MAGMA	NA	NA	WYAAANNRNNNGCG_UNKNOWN	63	0.527144	1.32901	0.028	0.342813	8
MOC	chromMAGMA	NA	NA	MYOGNF1_01	42	0.472156	1.61255	0.001	0.193752	1
MOC	MAGMA	ENSG00000101076	HNF4	HNF4_01	256	0.43766	1.22562	0.001	0.619455	15
HGSOC	chromMAGMA	NA	NA	CACBINDINGPROTEIN_Q6	236	0.403651	1.46345	0	0.202321	9
HGSOC	MAGMA	NA	NA	GNCF_01	71	0.530208	1.32866	0.019	0.306501	9
LGSOC	MAGMA	ENSG00000143190	POU2F1	OCT1_Q5_01	247	0.440509	1.21103	0.001	0.912308	13
EnOC	MAGMA	ENSG00000143190	POU2F1	OCT1_06	243	0.433594	1.22406	0.001	0.548151	16
HGSOC	chromMAGMA	NA	NA	CMYB_01	240	0.401986	1.46094	0	0.187791	10
EnOC	MAGMA	NA	NA	CREBP1CJUN_01	253	0.438453	1.23373	0.001	0.573938	13
HGSOC	MAGMA	NA	NA	CAGNYGKNAAA_UNKNOWN	74	0.526162	1.32091	0.017	0.307157	10
MOC	MAGMA	NA	NA	YATGNWAAT_OCT_C	338	0.419603	1.18203	0.001	0.527106	38
CCOC	chromMAGMA	NA	NA	KTGGYRSGAA_UNKNOWN	72	0.419745	1.54712	0.002	0.0892972	5
MOC	chromMAGMA	NA	NA	MEIS1AHOXA9_01	107	0.387083	1.45397	0.002	0.0954817	15
NMOC	MAGMA	NA	NA	TNCATNTCCYR_UNKNOWN	127	0.520602	1.3243	0.002	0.508258	5
CCOC	MAGMA	ENSG00000101076	HNF4	HNF4_01_B	242	0.435755	1.23459	0.002	0.406299	19
CCOC	chromMAGMA	NA	NA	CACBINDINGPROTEIN_Q6	236	0.336955	1.36052	0.002	0.104725	44
CCOC	chromMAGMA	ENSG00000101412	E2F1	E2F1_Q3	228	0.336079	1.34969	0.002	0.105139	51
CCOC	chromMAGMA	NA	NA	E2F1DP2_01	220	0.335908	1.35838	0.002	0.105239	45
EnOC	MAGMA	ENSG00000177606	AP1	AP1_Q4	264	0.442279	1.2445	0.002	0.563003	11
CCOC	chromMAGMA	ENSG00000125952	MAX	MAX_01	249	0.329549	1.33281	0.002	0.107671	62
CCOC	chromMAGMA	ENSG00000100811	YY1	YY1_02	236	0.330822	1.34205	0.002	0.108081	55
EnOC	chromMAGMA	NA	NA	NFMUE1_Q6	234	0.335686	1.37246	0.002	0.112179	35
EnOC	chromMAGMA	ENSG00000122034	AP2	AP2_Q6	246	0.343918	1.39229	0.002	0.117645	26
EnOC	chromMAGMA	NA	NA	NFKB_C	253	0.329604	1.34421	0.002	0.123312	46
CCOC	MAGMA	ENSG00000143190	POU2F1	OCT1_06	243	0.437259	1.23588	0.002	0.420704	18
CCOC	chromMAGMA	ENSG00000125398	SOX9	SOX9_B1	224	0.326649	1.3075	0.002	0.125994	75
CCOC	chromMAGMA	NA	NA	SMAD_Q6	240	0.32191	1.31338	0.002	0.126208	69
CCOC	MAGMA	NA	NA	TCCATTKW_UNKNOWN	230	0.421101	1.19557	0.002	0.427065	36
MOC	chromMAGMA	NA	NA	NFMUE1_Q6	234	0.338817	1.34636	0.002	0.130487	42
MOC	chromMAGMA	NA	NA	E2F_02	221	0.342628	1.3446	0.002	0.130542	43
MOC	chromMAGMA	ENSG00000144852	PXR	PXR_Q2	245	0.334946	1.32789	0.002	0.132352	53
MOC	chromMAGMA	NA	NA	E2F_Q3_01	218	0.345536	1.358	0.002	0.133184	35
MOC	chromMAGMA	ENSG00000154727	NRF2	NRF2_01	262	0.340737	1.36037	0.002	0.133605	34
EnOC	MAGMA	ENSG00000148516	AREB6	AREB6_03	250	0.428239	1.21231	0.002	0.472773	23
NMOC	MAGMA	ENSG00000137309	HMGIY	HMGIY_Q6	241	0.483017	1.26481	0.002	0.331425	18
MOC	chromMAGMA	NA	NA	NKX61_01	209	0.336627	1.31546	0.002	0.142623	58
LGSOC	chromMAGMA	ENSG00000125618	PAX8	PAX8_B	91	0.400029	1.48902	0.002	0.147925	6
NMOC	MAGMA	ENSG00000106331	PAX4	PAX4_03	249	0.475357	1.24123	0.002	0.331884	26
NMOC	MAGMA	NA	NA	NKX61_01	227	0.476954	1.23939	0.002	0.328778	27
NMOC	chromMAGMA	ENSG00000100105	MAZR	MAZR_01	209	0.38299	1.37944	0.002	0.147304	29
NMOC	MAGMA	ENSG00000101076	HNF4	HNF4_Q6	261	0.468881	1.22831	0.002	0.293284	36
NMOC	chromMAGMA	ENSG00000180318	ALX1	CART1_01	197	0.380793	1.35739	0.002	0.151714	37
NMOC	chromMAGMA	ENSG00000102145	GATA1	GATA1_01	220	0.378404	1.35195	0.002	0.15322	39
NMOC	chromMAGMA	NA	NA	NFMUE1_Q6	234	0.372876	1.35008	0.002	0.148577	41
NMOC	chromMAGMA	ENSG00000143190	POU2F1	OCT1_Q5_01	232	0.367654	1.32642	0.002	0.148792	55
HGSOC	chromMAGMA	NA	NA	NFY_C	223	0.400898	1.44625	0.001	0.200188	11
NMOC	chromMAGMA	ENSG00000231924	SP1	SP1_Q2_01	236	0.366768	1.32192	0.002	0.148513	58
LGSOC	chromMAGMA	ENSG00000103495	MAZ	MAZ_Q6	178	0.354417	1.37522	0.002	0.171012	22
LGSOC	chromMAGMA	ENSG00000112658	SRF	SRF_C	199	0.352593	1.37441	0.002	0.165709	23
LGSOC	chromMAGMA	ENSG00000101076	HNF4	HNF4_01	243	0.337397	1.34287	0.002	0.145447	39
LGSOC	chromMAGMA	ENSG00000164299	SPZ1	SPZ1_01	221	0.337044	1.32824	0.002	0.159818	43
HGSOC	MAGMA	NA	NA	GTCNYYATGR_UNKNOWN	108	0.514985	1.31328	0.005	0.309785	11
HGSOC	MAGMA	NA	NA	AACYNNNNTTCCS_UNKNOWN	94	0.510091	1.30219	0.016	0.334477	12
HGSOC	chromMAGMA	ENSG00000125618	PAX8	PAX8_01	36	0.461106	1.44597	0.0402414	0.184173	12
HGSOC	MAGMA	ENSG00000164299	SPZ1	SPZ1_01	227	0.4956	1.30218	0.002	0.308748	13
HGSOC	chromMAGMA	NA	NA	GATGKMRGCG_UNKNOWN	64	0.433626	1.44395	0.023	0.17393	13
HGSOC	MAGMA	NA	NA	RAAGNYNNCTTY_UNKNOWN	139	0.502152	1.29598	0.006	0.311271	14
LGSOC	chromMAGMA	ENSG00000143437	ARNT	ARNT_01	253	0.327041	1.29873	0.002	0.197639	52
LGSOC	chromMAGMA	NA	NA	ACTAYRNNNCCCR_UNKNOWN	427	0.314765	1.27466	0.002	0.222963	64
HGSOC	chromMAGMA	NA	NA	RGTTAMWNATT_HNF1_01	66	0.426841	1.42399	0.018018	0.200599	14
HGSOC	chromMAGMA	ENSG00000100105	MAZR	MAZR_01	209	0.392508	1.42394	0	0.187359	15
HGSOC	MAGMA	NA	NA	KRCTCNNNNMANAGC_UNKNOWN	15	0.574086	1.29074	0.115972	0.313322	15
HGSOC	chromMAGMA	NA	NA	E2F_01	61	0.427818	1.42067	0.015	0.182902	16
HGSOC	MAGMA	ENSG00000163064	EN1	EN1_01	109	0.50098	1.28112	0.018	0.335436	16
CCOC	MAGMA	NA	NA	HNF4ALPHA_Q6	255	0.433821	1.2256	0.003	0.391391	23
CCOC	chromMAGMA	ENSG00000118217	ATF6	ATF6_01	114	0.370675	1.43117	0.003	0.091466	21
EnOC	chromMAGMA	NA	NA	MCAATNNNNNGCG_UNKNOWN	79	0.399131	1.48918	0.003	0.0927539	10
CCOC	MAGMA	ENSG00000120690	ELF1	ELF1_Q6	236	0.440898	1.24657	0.003	0.395213	16
CCOC	chromMAGMA	NA	NA	RGTTAMWNATT_HNF1_01	66	0.423709	1.55552	0.003	0.0998854	4
CCOC	chromMAGMA	NA	NA	E2F4DP2_01	220	0.335908	1.35042	0.003	0.105983	50
CCOC	MAGMA	NA	NA	LFA1_Q6	245	0.426106	1.2083	0.003	0.409125	30
CCOC	chromMAGMA	ENSG00000101412	E2F1	E2F1_Q6_01	226	0.332362	1.33259	0.003	0.106216	63
MOC	chromMAGMA	NA	NA	GGAANCGGAANY_UNKNOWN	105	0.395123	1.46782	0.003	0.110134	11
EnOC	chromMAGMA	NA	NA	TFIII_Q6	193	0.343717	1.38217	0.003	0.112323	31
NMOC	chromMAGMA	NA	NA	TNCATNTCCYR_UNKNOWN	125	0.415312	1.44907	0.003	0.186579	10
EnOC	chromMAGMA	ENSG00000171786	HEN1	HEN1_01	184	0.343866	1.38411	0.003	0.117102	29
EnOC	chromMAGMA	NA	NA	NFY_C	223	0.334213	1.34349	0.003	0.121753	47
MOC	chromMAGMA	NA	NA	E2F_Q3	209	0.353307	1.38472	0.003	0.122927	27
EnOC	chromMAGMA	ENSG00000167825	OLF1	OLF1_01	248	0.331211	1.34083	0.003	0.12374	48
CCOC	chromMAGMA	ENSG00000185811	LYF1	LYF1_01	247	0.324134	1.31062	0.003	0.125625	72
CCOC	chromMAGMA	NA	NA	MYCMAX_03	242	0.322517	1.30956	0.003	0.125765	73
MOC	chromMAGMA	NA	NA	E2F4DP2_01	220	0.345261	1.35787	0.003	0.129706	36
CCOC	chromMAGMA	ENSG00000089558	ELK1	ELK1_02	243	0.320049	1.29868	0.003	0.130917	81
CCOC	chromMAGMA	ENSG00000100811	YY1	YY1_01	231	0.319625	1.29331	0.003	0.134146	85
EnOC	chromMAGMA	ENSG00000143437	ARNT	ARNT_02	236	0.324258	1.30723	0.003	0.140872	66
MOC	chromMAGMA	ENSG00000164299	SPZ1	SPZ1_01	221	0.33047	1.30053	0.003	0.141873	71
EnOC	chromMAGMA	NA	NA	NFKB_Q6	244	0.322944	1.31058	0.003	0.142843	62
EnOC	chromMAGMA	NA	NA	CETS1P54_01	254	0.32226	1.31677	0.003	0.142962	57
MOC	chromMAGMA	NA	NA	E2F4DP1_01	222	0.344176	1.34881	0.003	0.143073	37
EnOC	chromMAGMA	ENSG00000100644	HIF1A	HIF1_Q3	220	0.325689	1.31399	0.003	0.14619	58
NMOC	MAGMA	ENSG00000100105	MAZR	MAZR_01	216	0.472951	1.23222	0.003	0.310004	32
MOC	chromMAGMA	ENSG00000177606	AP1	AP1_Q4	261	0.330627	1.30914	0.003	0.147317	61
MOC	chromMAGMA	ENSG00000177606	AP1	AP1_Q2	247	0.328549	1.30296	0.003	0.148021	66
HGSOC	MAGMA	ENSG00000099326	MZF1	MZF1_01	230	0.486747	1.27508	0.001	0.344769	17
NMOC	chromMAGMA	ENSG00000112658	SRF	SRF_Q5_01	205	0.377377	1.34462	0.003	0.149133	44
NMOC	chromMAGMA	ENSG00000102145	GATA1	GATA1_04	228	0.36421	1.31247	0.003	0.154051	63
HGSOC	chromMAGMA	ENSG00000100811	YY1	YY1_Q6	233	0.392698	1.41908	0.003	0.174909	17
NMOC	chromMAGMA	ENSG00000106331	PAX4	PAX4_01	246	0.363314	1.3083	0.003	0.154825	66
LGSOC	chromMAGMA	ENSG00000158773	USF	USF_01	245	0.340626	1.34332	0.003	0.148327	38
LGSOC	chromMAGMA	NA	NA	TFIII_Q6	193	0.338296	1.31798	0.003	0.179541	44
HGSOC	chromMAGMA	NA	NA	YTCCCRNNAGGY_UNKNOWN	65	0.42261	1.41695	0.015	0.169027	18
HGSOC	MAGMA	NA	NA	TAXCREB_02	26	0.535353	1.26883	0.0971944	0.356565	18
EnOC	MAGMA	ENSG00000163064	EN1	EN1_01	109	0.476026	1.29346	0.003	0.465416	6
NMOC	chromMAGMA	NA	NA	ACTAYRNNNCCCR_UNKNOWN	427	0.337807	1.25223	0.003	0.19031	110
MOC	MAGMA	ENSG00000107485	GATA3	GATA3_01	234	0.448513	1.24669	0.003	0.720579	9
MOC	MAGMA	NA	NA	GCM_Q2	230	0.436421	1.2189	0.003	0.613476	17
EnOC	MAGMA	NA	NA	RYAAAKNNNNNNTTGW_UNKNOWN	81	0.513326	1.38174	0.003	0.341067	2
CCOC	MAGMA	ENSG00000179348	GATA2	GATA2_01	104	0.481046	1.32295	0.003	1	1
EnOC	chromMAGMA	NA	NA	CGGAARNGGCNG_UNKNOWN	52	0.449658	1.60675	0.003003	0.0743758	3
NMOC	chromMAGMA	NA	NA	YTCCCRNNAGGY_UNKNOWN	65	0.471291	1.54327	0.004	0.324126	2
NMOC	chromMAGMA	ENSG00000072310	SREBP1	SREBP1_02	82	0.452277	1.52801	0.004	0.190074	4
NMOC	chromMAGMA	NA	NA	GATGKMRGCG_UNKNOWN	64	0.458095	1.51614	0.004	0.14656	6
CCOC	chromMAGMA	NA	NA	E2F4DP1_01	222	0.336843	1.34831	0.004	0.104999	52
CCOC	chromMAGMA	ENSG00000101412	E2F1	E2F1_Q4_01	212	0.333601	1.33667	0.004	0.10605	60
EnOC	MAGMA	ENSG00000177606	AP1	AP1_Q2	254	0.429047	1.20971	0.004	0.474703	24
CCOC	MAGMA	ENSG00000177426	TGIF	TGIF_01	236	0.428239	1.21573	0.004	0.412786	26
HGSOC	chromMAGMA	NA	NA	CDPCR1_01	115	0.40476	1.4168	0.007	0.160552	19
EnOC	chromMAGMA	ENSG00000101412	E2F1	E2F1_Q4	231	0.334471	1.35157	0.004	0.129751	40
CCOC	chromMAGMA	ENSG00000152977	ZIC1	ZIC1_01	243	0.318702	1.29962	0.004	0.13098	80
CCOC	chromMAGMA	ENSG00000172845	SP3	SP3_Q3	230	0.320175	1.29583	0.004	0.134559	82
NMOC	MAGMA	NA	NA	GTTRYCATRR_UNKNOWN	163	0.492509	1.26744	0.004	0.358789	16
MOC	chromMAGMA	ENSG00000100811	YY1	YY1_Q6	233	0.34076	1.34638	0.004	0.137012	40
MOC	chromMAGMA	ENSG00000141646	SMAD4	SMAD4_Q6	224	0.335169	1.31683	0.004	0.142374	57
EnOC	chromMAGMA	NA	NA	E2F_03	229	0.325691	1.30801	0.004	0.143351	64
LGSOC	chromMAGMA	NA	NA	RRCCGTTA_UNKNOWN	82	0.400275	1.47224	0.004	0.137585	8
MOC	chromMAGMA	ENSG00000101412	E2F1	E2F1_Q4_01	212	0.335038	1.30557	0.004	0.147013	64
LGSOC	chromMAGMA	NA	NA	ACTWSNACTNY_UNKNOWN	100	0.389866	1.44368	0.004	0.177331	9
NMOC	MAGMA	ENSG00000099326	MZF1	MZF1_02	230	0.474487	1.23271	0.004	0.317617	31
LGSOC	chromMAGMA	ENSG00000169083	AR	AR_01	144	0.36628	1.39928	0.004	0.161039	17
MOC	chromMAGMA	NA	NA	CGGAARNGGCNG_UNKNOWN	52	0.438049	1.54383	0.004	0.156471	3
LGSOC	chromMAGMA	ENSG00000112658	SRF	SRF_Q6	225	0.343788	1.36254	0.004	0.158918	28
LGSOC	chromMAGMA	NA	NA	CEBPDELTA_Q6	217	0.344139	1.34942	0.004	0.153829	34
LGSOC	chromMAGMA	ENSG00000112658	SRF	SRF_Q5_01	205	0.345161	1.34836	0.004	0.151206	35
HGSOC	MAGMA	NA	NA	TTGCWCAAY_CEBPB_02	62	0.506901	1.26347	0.046	0.366278	19
MOC	MAGMA	ENSG00000117505	DR1	DR1_Q3	245	0.431667	1.20713	0.004	0.553981	23
EnOC	chromMAGMA	ENSG00000118260	CREB	CREB_02	237	0.314401	1.27388	0.004	0.171514	85
EnOC	chromMAGMA	NA	NA	CATTGTYY_SOX9_B1	339	0.307003	1.26399	0.004	0.174479	96
NMOC	chromMAGMA	NA	NA	YATGNWAAT_OCT_C	315	0.349881	1.27965	0.004	0.171145	86
LGSOC	chromMAGMA	ENSG00000231924	SP1	SP1_Q2_01	236	0.328573	1.2897	0.004	0.210873	55
MOC	MAGMA	ENSG00000136574	GATA4	GATA4_Q3	239	0.443743	1.23078	0.004	0.772151	11
EnOC	MAGMA	ENSG00000106331	PAX4	PAX4_04	209	0.43826	1.225	0.004	0.577226	15
EnOC	MAGMA	ENSG00000184486	POU3F2	POU3F2_01	99	0.480994	1.30882	0.004	0.442681	5
HGSOC	chromMAGMA	ENSG00000158773	USF	USF_Q6_01	231	0.389693	1.41017	0	0.163929	20
CCOC	MAGMA	ENSG00000099326	MZF1	MZF1_01	230	0.433939	1.22613	0.005	0.40509	22
CCOC	chromMAGMA	ENSG00000101076	HNF4	HNF4_01_B	235	0.32267	1.3035	0.005	0.129752	77
CCOC	chromMAGMA	NA	NA	E2F_03	229	0.32157	1.3014	0.005	0.13129	78
MOC	chromMAGMA	NA	NA	AP2GAMMA_01	237	0.337473	1.33393	0.005	0.134715	48
EnOC	chromMAGMA	NA	NA	E2F_Q6_01	219	0.329047	1.32873	0.005	0.135866	51
EnOC	chromMAGMA	ENSG00000104689	TNFRSF10A	DR4_Q2	248	0.31937	1.307	0.005	0.137141	68
MOC	chromMAGMA	NA	NA	COUP_DR1_Q6	227	0.331002	1.30141	0.005	0.142387	70
CCOC	chromMAGMA	NA	NA	EGR_Q6	260	0.314427	1.27887	0.005	0.146647	95
MOC	chromMAGMA	ENSG00000231924	SP1	SP1_Q6_01	235	0.330255	1.30824	0.005	0.146793	62
NMOC	MAGMA	NA	NA	TCCATTKW_UNKNOWN	230	0.470199	1.22697	0.005	0.291953	37
NMOC	MAGMA	ENSG00000143190	POU2F1	OCT1_03	224	0.470327	1.21778	0.005	0.320139	39
NMOC	MAGMA	NA	NA	GTGGGTGK_UNKNOWN	284	0.464303	1.21596	0.005	0.313767	41
EnOC	chromMAGMA	ENSG00000118260	CREB	CREB_Q3	234	0.319531	1.29004	0.005	0.151532	77
NMOC	chromMAGMA	NA	NA	RACCACAR_AML_Q6	243	0.369709	1.33757	0.005	0.142383	50
MOC	chromMAGMA	ENSG00000100726	TELO2	TEL2_Q6	229	0.326014	1.28764	0.005	0.156035	77
MOC	chromMAGMA	ENSG00000143190	POU2F1	OCT1_06	224	0.324295	1.27992	0.005	0.160459	83
NMOC	chromMAGMA	ENSG00000148516	AREB6	AREB6_01	253	0.361052	1.31018	0.005	0.153605	65
NMOC	chromMAGMA	ENSG00000184486	POU3F2	POU3F2_02	228	0.362458	1.3069	0.005	0.155247	67
NMOC	chromMAGMA	NA	NA	TGATTTRY_GFI1_01	259	0.361335	1.30439	0.005	0.152824	70
NMOC	chromMAGMA	ENSG00000231924	SP1	SP1_Q6_01	235	0.356414	1.28289	0.005	0.170002	83
LGSOC	chromMAGMA	ENSG00000158773	USF	USF_Q6	245	0.327035	1.29618	0.005	0.200687	53
LGSOC	chromMAGMA	ENSG00000101412	E2F1	E2F1_Q3_01	235	0.326514	1.2838	0.005	0.205289	61
HGSOC	MAGMA	ENSG00000169083	AR	AR_Q6	243	0.477752	1.26099	0.004	0.360917	20
MOC	MAGMA	ENSG00000101076	HNF4	HNF4_Q6	261	0.425892	1.18954	0.005	0.513691	34
HGSOC	MAGMA	ENSG00000143190	POU2F1	OCT1_04	224	0.479644	1.26026	0	0.347779	21
HGSOC	chromMAGMA	NA	NA	TNCATNTCCYR_UNKNOWN	125	0.401735	1.40753	0.004	0.160887	21
EnOC	MAGMA	NA	NA	AP1FJ_Q2	260	0.429595	1.2155	0.005	0.513335	20
HGSOC	chromMAGMA	ENSG00000143190	POU2F1	OCT1_04	203	0.392816	1.40659	0.001	0.15512	22
EnOC	chromMAGMA	ENSG00000085276	MECOM	EVI1_06	20	0.542565	1.70403	0.00509684	0.0670402	1
NMOC	chromMAGMA	NA	NA	YRTCANNRCGC_UNKNOWN	61	0.457266	1.52231	0.006	0.162266	5
CCOC	chromMAGMA	ENSG00000141646	SMAD4	SMAD4_Q6	224	0.326827	1.3128	0.006	0.123736	71
CCOC	MAGMA	ENSG00000185811	LYF1	LYF1_01	259	0.421123	1.19482	0.006	0.421146	37
EnOC	chromMAGMA	ENSG00000115415	STAT1	STAT1_03	232	0.327553	1.32399	0.006	0.131436	56
CCOC	chromMAGMA	ENSG00000175832	PEA3	PEA3_Q6	243	0.318318	1.29477	0.006	0.133055	84
NMOC	chromMAGMA	NA	NA	KCCGNSWTTT_UNKNOWN	102	0.418326	1.42361	0.006	0.157066	16
EnOC	chromMAGMA	ENSG00000173757	STAT5B	STAT5B_01	228	0.323859	1.29925	0.006	0.139597	74
EnOC	chromMAGMA	ENSG00000128272	ATF4	ATF4_Q2	236	0.319908	1.30168	0.006	0.141351	71
NMOC	MAGMA	ENSG00000196628	TCF4	TCF4_Q5	228	0.476244	1.24471	0.006	0.326398	25
MOC	chromMAGMA	ENSG00000112658	SRF	SRF_C	199	0.331715	1.30323	0.006	0.14976	65
NMOC	MAGMA	ENSG00000099326	MZF1	MZF1_01	230	0.464547	1.21429	0.006	0.314607	42
MOC	chromMAGMA	ENSG00000089558	ELK1	ELK1_01	260	0.326211	1.29029	0.006	0.154736	75
LGSOC	chromMAGMA	NA	NA	TMTCGCGANR_UNKNOWN	159	0.34853	1.34537	0.006	0.152204	36
NMOC	chromMAGMA	ENSG00000158022	IRF	IRF_Q6	228	0.358775	1.29298	0.006	0.16969	73
CCOC	chromMAGMA	NA	NA	YGCGYRCGC_UNKNOWN	302	0.304591	1.24142	0.006	0.174241	131
NMOC	chromMAGMA	ENSG00000143190	POU2F1	OCT1_05	218	0.357652	1.28409	0.006	0.171544	81
HGSOC	MAGMA	NA	NA	MYAATNNNNNNNGGC_UNKNOWN	107	0.489909	1.2526	0.022	0.37375	22
LGSOC	chromMAGMA	ENSG00000122861	ATF	ATF_01	241	0.330371	1.2991	0.006	0.200455	51
HGSOC	MAGMA	NA	NA	YYCATTCAWW_UNKNOWN	185	0.479929	1.25249	0.004	0.358152	23
LGSOC	chromMAGMA	ENSG00000158773	USF	USF_Q6_01	231	0.325785	1.28431	0.006	0.207059	60
MOC	MAGMA	ENSG00000154727	NRF2	NRF2_01	264	0.425048	1.18905	0.006	0.503415	35
MOC	MAGMA	ENSG00000106331	PAX4	PAX4_01	257	0.431953	1.20887	0.006	0.589547	21
EnOC	MAGMA	ENSG00000043355	ZIC2	ZIC2_01	245	0.428877	1.2064	0.006	0.48428	25
HGSOC	chromMAGMA	NA	NA	GGCNNMSMYNTTG_UNKNOWN	71	0.415576	1.40433	0.029	0.152422	23
HGSOC	chromMAGMA	ENSG00000257923	CDP	CDP_02	94	0.404892	1.40411	0.013	0.146404	24
HGSOC	MAGMA	ENSG00000125618	PAX8	PAX8_B	96	0.486627	1.2486	0.032	0.365024	24
LGSOC	MAGMA	NA	NA	WCTCNATGGY_UNKNOWN	76	0.512299	1.34244	0.006	0.70312	2
MOC	MAGMA	ENSG00000186951	PPARA	PPARA_01	34	0.589419	1.48697	0.00601202	0.187039	1
EnOC	MAGMA	ENSG00000135903	PAX3	PAX3_01	19	0.640727	1.53514	0.00604839	0.0970228	1
CCOC	chromMAGMA	NA	NA	GGAANCGGAANY_UNKNOWN	105	0.361345	1.38466	0.007	0.0899265	37
MOC	chromMAGMA	NA	NA	MCAATNNNNNGCG_UNKNOWN	79	0.39464	1.46008	0.007	0.100951	13
CCOC	MAGMA	ENSG00000101076	HNF4	HNF4_01	256	0.42671	1.21202	0.007	0.410057	28
NMOC	MAGMA	ENSG00000179348	GATA2	GATA2_01	104	0.51673	1.31641	0.007	0.348287	8
CCOC	MAGMA	NA	NA	YTAATTAA_LHX3_01	187	0.426657	1.20364	0.007	0.416217	32
CCOC	chromMAGMA	ENSG00000112658	SRF	SRF_Q5_01	205	0.318924	1.29009	0.007	0.135191	88
EnOC	chromMAGMA	ENSG00000103495	MAZ	MAZ_Q6	178	0.330474	1.30707	0.007	0.139068	67
CCOC	chromMAGMA	NA	NA	COUP_DR1_Q6	227	0.31806	1.28462	0.007	0.141381	91
EnOC	chromMAGMA	ENSG00000122034	AP2	AP2_Q3	235	0.321076	1.30047	0.007	0.141432	72
MOC	chromMAGMA	ENSG00000099326	MZF1	MZF1_02	221	0.332991	1.31433	0.007	0.142085	59
NMOC	chromMAGMA	NA	NA	ACAWYAAAG_UNKNOWN	88	0.414035	1.3944	0.007	0.142221	25
MOC	chromMAGMA	ENSG00000156925	ZIC3	ZIC3_01	240	0.329458	1.30251	0.007	0.146795	67
CCOC	chromMAGMA	NA	NA	TCCATTKW_UNKNOWN	220	0.313983	1.2691	0.007	0.152552	104
MOC	chromMAGMA	NA	NA	NFKB_Q6	244	0.325118	1.29156	0.007	0.154411	74
NMOC	MAGMA	NA	NA	LMO2COM_01	249	0.455867	1.1893	0.007	0.37004	54
HGSOC	MAGMA	NA	NA	CDPCR1_01	123	0.486637	1.24771	0.015	0.355104	25
NMOC	MAGMA	NA	NA	YATTNATC_UNKNOWN	363	0.446954	1.17588	0.007	0.374713	67
EnOC	chromMAGMA	ENSG00000245848	CEBP	CEBP_C	188	0.315562	1.27005	0.007	0.172642	89
HGSOC	chromMAGMA	NA	NA	GNCF_01	67	0.41598	1.40143	0.018	0.14539	25
LGSOC	chromMAGMA	NA	NA	TCCCRNNRTGC_UNKNOWN	204	0.335924	1.31721	0.007	0.173367	46
HGSOC	MAGMA	ENSG00000072310	SREBP1	SREBP1_Q6	240	0.4745	1.24652	0.002	0.347486	26
HGSOC	chromMAGMA	NA	NA	CCCNNNNNNAAGWT_UNKNOWN	98	0.406802	1.3962	0.012	0.148841	26
HGSOC	chromMAGMA	NA	NA	NFMUE1_Q6	234	0.383153	1.38688	0	0.160781	27
LGSOC	chromMAGMA	ENSG00000115966	CREBP1	CREBP1_Q2	241	0.325982	1.29243	0.007	0.207218	54
MOC	chromMAGMA	NA	NA	ACTAYRNNNCCCR_UNKNOWN	427	0.302918	1.22229	0.007	0.214962	134
LGSOC	chromMAGMA	ENSG00000158773	USF	USF_02	254	0.322164	1.27575	0.007	0.226702	62
HGSOC	MAGMA	ENSG00000101076	HNF4	HNF4_01_B	242	0.473081	1.24239	0.007	0.357547	27
LGSOC	MAGMA	ENSG00000171786	HEN1	HEN1_02	193	0.448906	1.22021	0.007	1	10
LGSOC	MAGMA	ENSG00000171786	HEN1	HEN1_01	194	0.447724	1.22276	0.007	1	8
HGSOC	chromMAGMA	NA	NA	GGAMTNNNNNTCCY_UNKNOWN	108	0.39908	1.38334	0.012	0.161542	28
EnOC	chromMAGMA	NA	NA	CRGAARNNNNCGA_UNKNOWN	46	0.436128	1.53421	0.00700701	0.133825	4
CCOC	chromMAGMA	NA	NA	MYOGNF1_01	42	0.452343	1.58883	0.00702811	0.133842	2
CCOC	MAGMA	ENSG00000184481	FOXO4	FOXO4_01	234	0.429816	1.22053	0.008	0.393849	25
CCOC	chromMAGMA	NA	NA	TTGCWCAAY_CEBPB_02	62	0.399463	1.4649	0.008	0.0981195	13
EnOC	chromMAGMA	NA	NA	GGAANCGGAANY_UNKNOWN	105	0.369067	1.41062	0.008	0.12122	20
CCOC	chromMAGMA	ENSG00000082175	PGR	PR_Q2	239	0.324545	1.30823	0.008	0.126279	74
CCOC	chromMAGMA	ENSG00000186951	PPAR	PPAR_DR1_Q2	241	0.31621	1.28784	0.008	0.138161	89
EnOC	chromMAGMA	ENSG00000102145	GATA1	GATA1_01	220	0.324222	1.29948	0.008	0.141276	73
EnOC	chromMAGMA	ENSG00000111012	VDR	VDR_Q3	214	0.326262	1.31082	0.008	0.144824	61
HGSOC	MAGMA	ENSG00000184486	POU3F2	POU3F2_01	99	0.486232	1.24139	0.038	0.349564	28
CCOC	chromMAGMA	ENSG00000101412	E2F1	E2F1_Q3_01	235	0.311951	1.2694	0.008	0.153354	103
MOC	chromMAGMA	ENSG00000158773	USF	USF_Q6_01	231	0.32327	1.28397	0.008	0.159746	79
HGSOC	MAGMA	ENSG00000091831	ESR1	ER_Q6_01	262	0.469312	1.24129	0.002	0.338166	29
NMOC	chromMAGMA	ENSG00000072310	SREBP1	SREBP1_Q6	235	0.362715	1.30444	0.008	0.154981	69
EnOC	chromMAGMA	ENSG00000140262	HEB	HEB_Q6	237	0.313759	1.26912	0.008	0.169318	92
NMOC	chromMAGMA	ENSG00000106331	PAX4	PAX4_03	238	0.363695	1.30404	0.008	0.151291	71
HGSOC	chromMAGMA	NA	NA	GGAANCGGAANY_UNKNOWN	105	0.393158	1.38077	0.014	0.161319	29
HGSOC	chromMAGMA	NA	NA	GCGNNANTTCC_UNKNOWN	123	0.393859	1.37347	0.007	0.169116	30
EnOC	MAGMA	ENSG00000129654	HFH4	HFH4_01	189	0.43053	1.2054	0.008	0.456928	27
NMOC	chromMAGMA	NA	NA	CCAWWNAAGG_SRF_Q4	75	0.436943	1.46188	0.009	0.232098	7
EnOC	chromMAGMA	NA	NA	SGCGSSAAA_E2F1DP2_01	155	0.329887	1.308	0.009	0.141177	65
CCOC	chromMAGMA	ENSG00000198081	ZF5	ZF5_01	225	0.315984	1.28024	0.009	0.145455	94
NMOC	MAGMA	ENSG00000118922	AP2REP	AP2REP_01	174	0.476735	1.23158	0.009	0.294416	34
NMOC	MAGMA	ENSG00000085276	MECOM	EVI1_05	169	0.476464	1.22564	0.009	0.289665	38
CCOC	chromMAGMA	ENSG00000140262	HEB	HEB_Q6	237	0.314751	1.2719	0.009	0.151159	101
LGSOC	chromMAGMA	NA	NA	YAATNRNNNYNATT_UNKNOWN	91	0.380591	1.41074	0.009	0.158833	15
EnOC	chromMAGMA	NA	NA	NFKB_Q6_01	224	0.317894	1.28904	0.009	0.151565	78
CCOC	chromMAGMA	ENSG00000231924	SP1	SP1_Q2_01	236	0.315455	1.27196	0.009	0.152601	100
CCOC	chromMAGMA	ENSG00000164299	SPZ1	SPZ1_01	221	0.31185	1.25987	0.009	0.158594	113
HGSOC	MAGMA	NA	NA	CCANNAGRKGGC_UNKNOWN	113	0.482985	1.23885	0.023	0.338662	30
LGSOC	MAGMA	ENSG00000115966	CREBP1	CREBP1_Q2	248	0.436797	1.19701	0.009	0.843586	18
EnOC	chromMAGMA	ENSG00000164299	SPZ1	SPZ1_01	221	0.316364	1.27718	0.009	0.169759	82
EnOC	chromMAGMA	ENSG00000157557	ETS2	ETS2_B	266	0.312732	1.27516	0.009	0.172729	83
MOC	chromMAGMA	ENSG00000122034	AP2	AP2_Q3	235	0.323367	1.27095	0.009	0.174967	86
NMOC	chromMAGMA	ENSG00000107485	GATA3	GATA3_01	226	0.357747	1.28793	0.009	0.167111	79
HGSOC	chromMAGMA	ENSG00000106459	NRF1	NRF1_Q6	248	0.378018	1.37323	0.002	0.16408	31
MOC	MAGMA	ENSG00000101076	HNF4	HNF4_DR1_Q3	251	0.424304	1.18469	0.009	0.515157	37
LGSOC	MAGMA	NA	NA	CYTAGCAAY_UNKNOWN	142	0.463663	1.24281	0.009	1	4
EnOC	MAGMA	NA	NA	RACCACAR_AML_Q6	253	0.416468	1.17905	0.009	0.486933	41
MOC	MAGMA	NA	NA	TCCCRNNRTGC_UNKNOWN	206	0.430179	1.19968	0.009	0.540887	27
NMOC	MAGMA	NA	NA	MYOGNF1_01	46	0.577049	1.41137	0.01	0.407543	2
CCOC	chromMAGMA	ENSG00000179388	EGR3	EGR3_01	79	0.376359	1.4124	0.01	0.0856874	28
MOC	MAGMA	ENSG00000148516	AREB6	AREB6_04	237	0.423932	1.18113	0.01	0.508502	40
CCOC	chromMAGMA	ENSG00000135625	NGFIC	NGFIC_01	235	0.318732	1.2932	0.01	0.13276	86
MOC	chromMAGMA	NA	NA	E2F_01	61	0.416987	1.49819	0.01	0.140655	6
EnOC	chromMAGMA	ENSG00000171786	HEN1	HEN1_02	187	0.325443	1.30408	0.01	0.140823	69
CCOC	chromMAGMA	ENSG00000132005	EFC	EFC_Q6	245	0.316782	1.281	0.01	0.145559	93
NMOC	MAGMA	ENSG00000112658	SRF	SRF_C	206	0.475077	1.23215	0.01	0.300913	33
HGSOC	MAGMA	ENSG00000085276	MECOM	EVI1_03	58	0.498676	1.23736	0.068	0.335028	31
NMOC	chromMAGMA	NA	NA	AAGWWRNYGGC_UNKNOWN	114	0.386455	1.34609	0.01	0.152828	42
LGSOC	chromMAGMA	NA	NA	CCAWWNAAGG_SRF_Q4	75	0.392596	1.40997	0.01	0.150594	16
NMOC	MAGMA	ENSG00000165556	CDX2	CDX2_Q5	247	0.456328	1.19304	0.01	0.37602	50
CCOC	chromMAGMA	ENSG00000117505	DR1	DR1_Q3	235	0.31433	1.27017	0.01	0.153438	102
MOC	chromMAGMA	NA	NA	TCCCRNNRTGC_UNKNOWN	204	0.32808	1.28886	0.01	0.155841	76
EnOC	chromMAGMA	NA	NA	CREBP1CJUN_01	245	0.31217	1.2666	0.01	0.171954	94
NMOC	chromMAGMA	ENSG00000171634	FAC1	FAC1_01	196	0.360955	1.28895	0.01	0.167022	78
NMOC	chromMAGMA	NA	NA	CACCCBINDINGFACTOR_Q6	254	0.355316	1.28085	0.01	0.17223	84
MOC	chromMAGMA	ENSG00000101076	HNF4	HNF4_01	243	0.319838	1.26234	0.01	0.180031	94
NMOC	chromMAGMA	ENSG00000158773	USF	USF_02	254	0.34949	1.26157	0.01	0.180932	102
LGSOC	chromMAGMA	ENSG00000124782	RREB1	RREB1_01	197	0.329456	1.28689	0.01	0.207229	58
NMOC	chromMAGMA	NA	NA	YATTNATC_UNKNOWN	330	0.341327	1.24457	0.01	0.199319	116
LGSOC	chromMAGMA	ENSG00000118260	CREB	CREB_02	237	0.321445	1.26746	0.01	0.219132	72
NMOC	chromMAGMA	NA	NA	RGAANNTTC_HSF1_01	416	0.330335	1.21641	0.01	0.22113	150
EnOC	chromMAGMA	NA	NA	ACTAYRNNNCCCR_UNKNOWN	427	0.28964	1.20318	0.01	0.246127	153
LGSOC	MAGMA	ENSG00000143190	POU2F1	OCT1_05	234	0.439338	1.20748	0.01	0.839875	15
MOC	MAGMA	ENSG00000231924	SP1	SP1_Q6_01	237	0.437245	1.21622	0.01	0.575853	19
MOC	MAGMA	NA	NA	HNF4ALPHA_Q6	255	0.430181	1.19841	0.01	0.534073	28
HGSOC	MAGMA	ENSG00000143190	POU2F1	OCT1_05	234	0.4719	1.23449	0.005	0.339905	32
LGSOC	MAGMA	NA	NA	YGTCCTTGR_UNKNOWN	91	0.489995	1.28869	0.01	1	3
CCOC	chromMAGMA	ENSG00000082175	PGR	PR_02	125	0.346097	1.35273	0.011	0.104354	49
CCOC	chromMAGMA	ENSG00000169083	AR	AR_01	144	0.33916	1.32978	0.011	0.106852	65
CCOC	MAGMA	ENSG00000113580	GR	GR_01	193	0.429908	1.20941	0.011	0.414645	29
MOC	chromMAGMA	NA	NA	GGCNKCCATNK_UNKNOWN	116	0.366138	1.38072	0.011	0.125314	28
MOC	chromMAGMA	NA	NA	GGAMTNNNNNTCCY_UNKNOWN	108	0.358261	1.34362	0.011	0.129005	44
NMOC	chromMAGMA	ENSG00000179348	GATA2	GATA2_01	101	0.406723	1.39137	0.011	0.141676	26
CCOC	MAGMA	NA	NA	NKX25_01	119	0.457113	1.25544	0.011	0.455603	12
CCOC	chromMAGMA	NA	NA	GABP_B	259	0.314239	1.27424	0.011	0.152573	97
LGSOC	MAGMA	ENSG00000165030	E4BP4	E4BP4_01	211	0.435378	1.20083	0.011	0.835081	17
NMOC	chromMAGMA	ENSG00000162676	GFI1	GFI1_01	244	0.353996	1.27292	0.011	0.179696	89
MOC	chromMAGMA	ENSG00000143190	POU2F1	OCT1_01	228	0.320292	1.26243	0.011	0.181719	93
EnOC	chromMAGMA	ENSG00000143995	MEIS1	MEIS1_01	227	0.310414	1.25864	0.011	0.183303	98
NMOC	chromMAGMA	NA	NA	HP1SITEFACTOR_Q6	217	0.353557	1.26809	0.011	0.178941	95
NMOC	chromMAGMA	ENSG00000138795	LEF1	LEF1_Q6	242	0.349528	1.2617	0.011	0.184261	100
HGSOC	chromMAGMA	ENSG00000168310	IRF2	IRF2_01	118	0.390162	1.37229	0.019	0.160234	32
HGSOC	MAGMA	NA	NA	TCCATTKW_UNKNOWN	230	0.467574	1.23304	0.002	0.336212	33
NMOC	chromMAGMA	NA	NA	CATTGTYY_SOX9_B1	339	0.339116	1.23577	0.011	0.203718	127
MOC	MAGMA	ENSG00000102145	GATA1	GATA1_04	238	0.430424	1.20233	0.011	0.555833	25
LGSOC	MAGMA	ENSG00000102145	GATA1	GATA1_05	270	0.43417	1.19196	0.011	0.792706	21
LGSOC	chromMAGMA	ENSG00000101076	HNF4	HNF4_DR1_Q3	246	0.322593	1.26829	0.011	0.229374	68
LGSOC	chromMAGMA	ENSG00000100644	HIF1A	HIF1_Q5	231	0.323373	1.26798	0.011	0.220668	71
LGSOC	chromMAGMA	ENSG00000043355	ZIC2	ZIC2_01	234	0.320005	1.25698	0.011	0.221573	82
HGSOC	chromMAGMA	NA	NA	SNACANNNYSYAGA_UNKNOWN	85	0.395468	1.36961	0.024	0.160988	33
EnOC	MAGMA	ENSG00000169856	HNF6	HNF6_Q6	229	0.428676	1.20636	0.011	0.466039	26
HGSOC	chromMAGMA	ENSG00000158773	USF	USF_02	254	0.374015	1.36506	0.002	0.164169	34
HGSOC	MAGMA	ENSG00000072310	SREBP1	SREBP1_02	84	0.487386	1.22939	0.063	0.346444	34
HGSOC	MAGMA	ENSG00000118260	CREB	CREB_Q3	239	0.465564	1.22472	0.008	0.363236	35
MOC	MAGMA	NA	NA	COUP_DR1_Q6	231	0.428099	1.19409	0.011	0.554112	29
HGSOC	chromMAGMA	NA	NA	YRTCANNRCGC_UNKNOWN	61	0.414952	1.36376	0.0390782	0.161908	35
HGSOC	chromMAGMA	ENSG00000102145	GATA1	GATA1_01	220	0.37777	1.36226	0.002	0.160551	36
MOC	chromMAGMA	NA	NA	ATCMNTCCGY_UNKNOWN	50	0.427188	1.48235	0.011011	0.126466	8
CCOC	MAGMA	NA	NA	WWTAAGGC_UNKNOWN	139	0.439644	1.22374	0.012	0.387378	24
CCOC	chromMAGMA	NA	NA	CTCNANGTGNY_UNKNOWN	78	0.378215	1.41431	0.012	0.093932	25
CCOC	chromMAGMA	NA	NA	GGCNNMSMYNTTG_UNKNOWN	71	0.38353	1.41519	0.012	0.0968468	24
EnOC	chromMAGMA	NA	NA	TNCATNTCCYR_UNKNOWN	125	0.345683	1.3501	0.012	0.128612	41
CCOC	MAGMA	ENSG00000100105	MAZR	MAZR_01	216	0.423829	1.19935	0.012	0.43643	33
CCOC	chromMAGMA	NA	NA	E2F_Q3	209	0.320856	1.29479	0.012	0.134646	83
EnOC	chromMAGMA	ENSG00000124782	RREB1	RREB1_01	197	0.326597	1.30971	0.012	0.142116	63
NMOC	MAGMA	NA	NA	YTAAYNGCT_UNKNOWN	145	0.484503	1.23743	0.012	0.327573	28
LGSOC	chromMAGMA	ENSG00000115415	STAT1	STAT1_01	64	0.407084	1.44228	0.012	0.162199	10
NMOC	MAGMA	ENSG00000245848	CEBP	CEBP_Q2_01	261	0.459288	1.19837	0.012	0.358602	48
NMOC	MAGMA	NA	NA	AP3_Q6	235	0.456134	1.18919	0.012	0.364058	55
CCOC	chromMAGMA	ENSG00000122034	AP2	AP2_Q3	235	0.311136	1.25916	0.012	0.157156	115
MOC	chromMAGMA	ENSG00000115966	CREBP1	CREBP1_Q2	241	0.324727	1.28102	0.012	0.162374	81
LGSOC	chromMAGMA	NA	NA	CCANNAGRKGGC_UNKNOWN	111	0.356038	1.34533	0.012	0.148117	37
EnOC	chromMAGMA	NA	NA	PU1_Q6	220	0.31507	1.27315	0.012	0.171044	86
EnOC	chromMAGMA	ENSG00000064835	POU1F1	POU1F1_Q6	211	0.312839	1.27125	0.012	0.171773	88
NMOC	chromMAGMA	NA	NA	NFY_Q6_01	241	0.355924	1.2895	0.012	0.1681	77
HGSOC	MAGMA	ENSG00000108091	TST1	TST1_01	242	0.468025	1.22465	0.011	0.353507	36
HGSOC	chromMAGMA	ENSG00000184486	POU3F2	POU3F2_01	89	0.399869	1.35822	0.025	0.164459	37
MOC	chromMAGMA	ENSG00000128272	ATF4	ATF4_Q2	236	0.319819	1.26	0.012	0.180208	97
MOC	chromMAGMA	ENSG00000082175	PGR	PR_Q2	239	0.313496	1.24308	0.012	0.197522	111
LGSOC	MAGMA	ENSG00000171634	FAC1	FAC1_01	208	0.438019	1.19595	0.012	0.772881	20
EnOC	MAGMA	ENSG00000065970	FOXJ2	FOXJ2_01	177	0.435474	1.21624	0.012	0.533509	19
LGSOC	chromMAGMA	ENSG00000175832	PEA3	PEA3_Q6	243	0.319506	1.25702	0.012	0.224197	81
HGSOC	MAGMA	NA	NA	MEIS1BHOXA9_01	140	0.472418	1.22419	0.026	0.346413	37
LGSOC	chromMAGMA	ENSG00000156925	ZIC3	ZIC3_01	240	0.315971	1.24558	0.012	0.225381	94
HGSOC	chromMAGMA	ENSG00000158773	USF	USF_01	245	0.374069	1.35076	0.001	0.176218	38
HGSOC	MAGMA	NA	NA	NFY_C	228	0.466284	1.22337	0.011	0.341508	38
HGSOC	MAGMA	NA	NA	RRAGTTGT_UNKNOWN	243	0.463265	1.22312	0.01	0.333854	39
EnOC	MAGMA	ENSG00000152977	ZIC1	ZIC1_01	252	0.417063	1.17393	0.012	0.477383	46
EnOC	MAGMA	NA	NA	MYCMAX_B	265	0.420335	1.18709	0.012	0.522178	33
HGSOC	chromMAGMA	NA	NA	CAGNYGKNAAA_UNKNOWN	69	0.401998	1.34799	0.039	0.177344	39
HGSOC	chromMAGMA	ENSG00000072310	SREBP1	SREBP1_Q6	235	0.370675	1.34532	0.001	0.178438	40
HGSOC	MAGMA	NA	NA	GTGGGTGK_UNKNOWN	284	0.462655	1.22058	0.006	0.33886	40
CCOC	MAGMA	NA	NA	RGTTAMWNATT_HNF1_01	70	0.47822	1.29101	0.013	0.389336	8
EnOC	chromMAGMA	NA	NA	AAGWWRNYGGC_UNKNOWN	114	0.351128	1.3573	0.013	0.126153	38
NMOC	MAGMA	NA	NA	RYTGCNWTGGNR_UNKNOWN	106	0.500951	1.27774	0.013	0.32837	15
EnOC	MAGMA	ENSG00000122861	ATF	ATF_01	253	0.416414	1.17975	0.013	0.492355	40
NMOC	chromMAGMA	NA	NA	RRCCGTTA_UNKNOWN	82	0.418925	1.4013	0.013	0.142233	23
CCOC	chromMAGMA	ENSG00000112658	SRF	SRF_C	199	0.316423	1.27337	0.013	0.152861	98
CCOC	chromMAGMA	NA	NA	E2F_Q2	168	0.322908	1.27219	0.013	0.153718	99
CCOC	chromMAGMA	ENSG00000158773	USF	USF_01	245	0.313681	1.26592	0.013	0.154408	107
CCOC	chromMAGMA	ENSG00000101076	HNF4	HNF4_01	243	0.310246	1.2589	0.013	0.156455	116
CCOC	chromMAGMA	ENSG00000154727	NRF2	NRF2_01	262	0.307334	1.24875	0.013	0.167306	124
LGSOC	MAGMA	ENSG00000105516	DBP	DBP_Q6	248	0.433461	1.19156	0.013	0.762538	22
HGSOC	MAGMA	ENSG00000178573	MAF	MAF_Q6	257	0.463565	1.21806	0.012	0.343963	41
EnOC	chromMAGMA	ENSG00000118260	CREB	CREB_Q4	255	0.306959	1.24816	0.013	0.196003	106
NMOC	chromMAGMA	ENSG00000167074	TEF	TEF_Q6	233	0.348313	1.26118	0.013	0.180118	103
MOC	chromMAGMA	NA	NA	YGCGYRCGC_UNKNOWN	302	0.308908	1.23689	0.013	0.205041	116
LGSOC	chromMAGMA	ENSG00000185507	IRF7	IRF7_01	233	0.319027	1.25181	0.013	0.219088	89
LGSOC	chromMAGMA	NA	NA	MYCMAX_01	243	0.31491	1.25065	0.013	0.220244	90
HGSOC	chromMAGMA	NA	NA	GGCNRNWCTTYS_UNKNOWN	81	0.396308	1.34108	0.036	0.182798	41
HGSOC	chromMAGMA	NA	NA	GCCATNTTG_YY1_Q6	415	0.363885	1.34056	0	0.179685	42
CCOC	MAGMA	NA	NA	GNCF_01	71	0.486729	1.30605	0.013	0.615883	4
EnOC	MAGMA	NA	NA	HNF3ALPHA_Q6	201	0.423657	1.18542	0.013	0.507999	35
LGSOC	chromMAGMA	NA	NA	HOX13_01	41	0.440519	1.49192	0.0130522	0.170307	5
CCOC	MAGMA	ENSG00000119614	CHX10	CHX10_01	217	0.424142	1.19868	0.014	0.428507	34
CCOC	MAGMA	ENSG00000134532	SOX5	SOX5_01	257	0.413904	1.17448	0.014	0.443155	51
NMOC	chromMAGMA	NA	NA	GCGNNANTTCC_UNKNOWN	123	0.395824	1.37515	0.014	0.149397	30
MOC	chromMAGMA	NA	NA	TNCATNTCCYR_UNKNOWN	125	0.345724	1.30693	0.014	0.147111	63
CCOC	chromMAGMA	ENSG00000112658	SRF	SRF_Q4	207	0.316894	1.26885	0.014	0.151584	105
CCOC	chromMAGMA	ENSG00000144852	PXR	PXR_Q2	245	0.311035	1.26242	0.014	0.156133	111
CCOC	chromMAGMA	ENSG00000100644	HIF1A	HIF1_Q5	231	0.310462	1.25397	0.014	0.162903	119
CCOC	chromMAGMA	ENSG00000168066	SF1	SF1_Q6	238	0.308182	1.25488	0.014	0.163536	117
EnOC	chromMAGMA	ENSG00000120738	EGR1	EGR1_01	256	0.311839	1.26957	0.014	0.169936	91
NMOC	chromMAGMA	ENSG00000124782	RREB1	RREB1_01	197	0.36144	1.2924	0.014	0.1686	74
CCOC	chromMAGMA	ENSG00000115415	STAT1	STAT1_02	242	0.305479	1.24155	0.014	0.175266	130
HGSOC	MAGMA	ENSG00000125618	PAX8	PAX8_01	36	0.502266	1.21755	0.132	0.338298	42
NMOC	chromMAGMA	ENSG00000101412	E2F1	E2F1_Q4	231	0.35248	1.27144	0.014	0.177077	92
HGSOC	chromMAGMA	NA	NA	RACCACAR_AML_Q6	243	0.36712	1.33978	0.006	0.176972	43
NMOC	chromMAGMA	NA	NA	CDPCR3HD_01	213	0.352639	1.26272	0.014	0.185857	98
EnOC	chromMAGMA	NA	NA	COREBINDINGFACTOR_Q6	247	0.305505	1.24565	0.014	0.197384	109
NMOC	chromMAGMA	NA	NA	CEBPGAMMA_Q6	228	0.34876	1.25547	0.014	0.185525	108
LGSOC	chromMAGMA	ENSG00000231924	SP1	SP1_Q6	245	0.320217	1.26902	0.014	0.230452	67
LGSOC	chromMAGMA	ENSG00000138795	LEF1	LEF1_Q2	203	0.322552	1.26426	0.014	0.219026	75
LGSOC	chromMAGMA	ENSG00000126561	STAT5A	STAT5A_03	236	0.319588	1.25726	0.014	0.226237	80
LGSOC	chromMAGMA	NA	NA	NFY_C	223	0.319975	1.25264	0.014	0.221387	87
LGSOC	MAGMA	ENSG00000137309	HMGIY	HMGIY_Q6	241	0.433279	1.18698	0.014	0.728202	25
EnOC	MAGMA	ENSG00000111012	VDR	VDR_Q6	256	0.414659	1.17479	0.014	0.490762	44
EnOC	MAGMA	NA	NA	AAANWWTGC_UNKNOWN	191	0.431478	1.20476	0.014	0.446253	28
HGSOC	MAGMA	ENSG00000245848	CEBP	CEBP_01	262	0.460567	1.21644	0.01	0.336781	43
MOC	MAGMA	NA	NA	NKX25_01	119	0.460089	1.25117	0.014	0.750762	8
CCOC	chromMAGMA	NA	NA	YGACNNYACAR_UNKNOWN	83	0.364213	1.38215	0.015	0.0900576	38
MOC	chromMAGMA	NA	NA	AACYNNNNTTCCS_UNKNOWN	93	0.36323	1.34259	0.015	0.125264	46
NMOC	chromMAGMA	NA	NA	CAGNYGKNAAA_UNKNOWN	69	0.435178	1.43816	0.015	0.141192	15
CCOC	MAGMA	ENSG00000082175	PGR	PR_Q2	255	0.414464	1.17673	0.015	0.451994	48
LGSOC	chromMAGMA	NA	NA	YTCCCRNNAGGY_UNKNOWN	65	0.396601	1.42688	0.015	0.162266	12
NMOC	chromMAGMA	NA	NA	AACYNNNNTTCCS_UNKNOWN	93	0.396075	1.36027	0.015	0.154295	35
LGSOC	chromMAGMA	NA	NA	GCGSCMNTTT_UNKNOWN	68	0.3894	1.39308	0.015	0.165711	18
CCOC	MAGMA	ENSG00000148516	AREB6	AREB6_02	246	0.417885	1.18277	0.015	0.47403	41
LGSOC	chromMAGMA	NA	NA	KCCGNSWTTT_UNKNOWN	102	0.36661	1.36415	0.015	0.161098	27
HGSOC	chromMAGMA	ENSG00000164299	SPZ1	SPZ1_01	221	0.373838	1.33858	0.003	0.17611	44
CCOC	chromMAGMA	ENSG00000188786	MTF1	MTF1_Q4	231	0.309185	1.25403	0.015	0.16408	118
HGSOC	MAGMA	ENSG00000137309	HMGIY	HMGIY_Q6	241	0.458757	1.21146	0.023	0.356541	44
CCOC	chromMAGMA	ENSG00000158773	USF	USF_02	254	0.30888	1.24545	0.015	0.169155	128
MOC	chromMAGMA	ENSG00000085276	MECOM	EVI1_04	201	0.322985	1.27104	0.015	0.17672	85
EnOC	chromMAGMA	ENSG00000106459	NRF1	NRF1_Q6	248	0.310799	1.25738	0.015	0.184544	99
MOC	chromMAGMA	NA	NA	CETS1P54_01	254	0.315893	1.2486	0.015	0.192309	106
EnOC	chromMAGMA	ENSG00000106331	PAX4	PAX4_01	246	0.306853	1.24958	0.015	0.194163	105
MOC	chromMAGMA	ENSG00000104783	IK1	IK1_01	257	0.311274	1.23346	0.015	0.207887	120
NMOC	chromMAGMA	NA	NA	GTGGGTGK_UNKNOWN	273	0.340291	1.23826	0.015	0.203812	123
LGSOC	chromMAGMA	ENSG00000154727	NRF2	NRF2_Q4	237	0.312459	1.24296	0.015	0.219512	100
HGSOC	MAGMA	ENSG00000106331	PAX4	PAX4_03	249	0.462414	1.21062	0.005	0.353085	45
HGSOC	chromMAGMA	ENSG00000072310	SREBP1	SREBP1_01	156	0.377408	1.33635	0.014	0.176955	45
HGSOC	chromMAGMA	ENSG00000180318	ALX1	CART1_01	197	0.372777	1.33384	0.001	0.178001	46
MOC	MAGMA	NA	NA	ISRE_01	242	0.427733	1.1918	0.015	0.524012	32
EnOC	MAGMA	NA	NA	TGACGTCA_ATF3_Q6	224	0.420699	1.181	0.015	0.506425	38
HGSOC	MAGMA	ENSG00000124782	RREB1	RREB1_01	204	0.461008	1.21023	0.017	0.347823	46
NMOC	chromMAGMA	NA	NA	MYOGNF1_01	42	0.484561	1.52922	0.016	0.250431	3
MOC	chromMAGMA	NA	NA	WWTAAGGC_UNKNOWN	131	0.353097	1.34183	0.016	0.12364	47
NMOC	MAGMA	NA	NA	RAAGNYNNCTTY_UNKNOWN	139	0.487742	1.25409	0.016	0.308644	23
NMOC	MAGMA	ENSG00000136352	TITF1	TITF1_Q3	233	0.455151	1.18863	0.016	0.360861	56
NMOC	MAGMA	NA	NA	NFY_C	228	0.456081	1.18858	0.016	0.354898	57
EnOC	chromMAGMA	NA	NA	E2F1DP1RB_01	216	0.31396	1.26778	0.016	0.170908	93
LGSOC	MAGMA	ENSG00000167967	E4F1	E4F1_Q6	275	0.42954	1.18149	0.016	0.743607	27
MOC	chromMAGMA	NA	NA	E2F_Q4_01	220	0.318631	1.25839	0.016	0.180523	99
MOC	chromMAGMA	NA	NA	MYCMAX_02	250	0.313759	1.25079	0.016	0.196272	101
NMOC	chromMAGMA	ENSG00000076356	OCT	OCT_C	217	0.350853	1.25698	0.016	0.184863	106
NMOC	chromMAGMA	ENSG00000185507	IRF7	IRF7_01	233	0.346546	1.2541	0.016	0.187256	109
NMOC	chromMAGMA	ENSG00000112658	SRF	SRF_Q4	207	0.346269	1.2477	0.016	0.196183	113
HGSOC	MAGMA	NA	NA	CACCCBINDINGFACTOR_Q6	262	0.4589	1.20866	0.006	0.349573	47
LGSOC	chromMAGMA	NA	NA	CMYB_01	240	0.31607	1.24345	0.016	0.220496	99
NMOC	chromMAGMA	ENSG00000111012	VDR	VDR_Q6	243	0.339366	1.22314	0.016	0.214347	142
MOC	MAGMA	ENSG00000169856	HNF6	HNF6_Q6	229	0.422446	1.17942	0.016	0.512908	41
LGSOC	chromMAGMA	NA	NA	WGGAATGY_TEF1_Q6	346	0.302593	1.2112	0.016	0.25938	129
HGSOC	chromMAGMA	NA	NA	GKCGCNNNNNNNTGAYG_UNKNOWN	54	0.409468	1.32922	0.07	0.184071	47
HGSOC	MAGMA	ENSG00000101076	HNF4	HNF4_DR1_Q3	251	0.457035	1.20657	0.013	0.354563	48
HGSOC	chromMAGMA	NA	NA	RYTAAWNNNTGAY_UNKNOWN	53	0.405577	1.32877	0.073	0.181153	48
HGSOC	chromMAGMA	ENSG00000231924	SP1	SP1_Q2_01	236	0.365671	1.32441	0	0.187114	49
HGSOC	MAGMA	NA	NA	NKX61_01	227	0.460162	1.20442	0.012	0.359003	49
NMOC	MAGMA	ENSG00000186951	PPARA	PPARA_01	34	0.599761	1.43041	0.016016	0.644072	1
CCOC	MAGMA	NA	NA	NKX25_02	250	0.41326	1.173	0.017	0.438302	53
CCOC	MAGMA	NA	NA	RRAGTTGT_UNKNOWN	243	0.413447	1.17557	0.017	0.442496	50
NMOC	chromMAGMA	NA	NA	E2F_01	61	0.425114	1.41136	0.017	0.144961	20
EnOC	MAGMA	ENSG00000184486	BRN2	BRN2_01	229	0.418013	1.17211	0.017	0.484079	47
CCOC	MAGMA	NA	NA	COUP_01	251	0.415693	1.17678	0.017	0.461207	47
CCOC	chromMAGMA	NA	NA	NFKAPPAB_01	237	0.314225	1.26477	0.017	0.155467	108
CCOC	chromMAGMA	ENSG00000099326	MZF1	MZF1_01	225	0.311506	1.26288	0.017	0.156617	110
CCOC	chromMAGMA	NA	NA	TFIII_Q6	193	0.318966	1.2612	0.017	0.157227	112
CCOC	chromMAGMA	ENSG00000071564	E2A	E2A_Q2	220	0.309086	1.24852	0.017	0.165102	126
NMOC	MAGMA	NA	NA	HNF4ALPHA_Q6	255	0.448725	1.17738	0.017	0.37655	65
MOC	chromMAGMA	ENSG00000186951	PPAR	PPAR_DR1_Q2	241	0.320492	1.26408	0.017	0.180014	92
EnOC	chromMAGMA	NA	NA	AML_Q6	244	0.304426	1.23407	0.017	0.201336	125
LGSOC	chromMAGMA	ENSG00000101076	HNF4	HNF4_01_B	235	0.316948	1.24566	0.017	0.227621	93
LGSOC	chromMAGMA	ENSG00000118513	MYB	MYB_Q3	233	0.315534	1.24023	0.017	0.219122	104
HGSOC	chromMAGMA	ENSG00000125952	MAX	MAX_01	249	0.364728	1.32327	0.003	0.185914	50
MOC	chromMAGMA	NA	NA	WTTGKCTG_UNKNOWN	471	0.293711	1.19511	0.017	0.246121	167
HGSOC	MAGMA	ENSG00000139515	IPF1	IPF1_Q4	240	0.457294	1.20395	0.013	0.354003	50
LGSOC	chromMAGMA	NA	NA	TCANNTGAY_SREBP1_01	441	0.300197	1.20675	0.017	0.262854	135
LGSOC	MAGMA	ENSG00000143190	POU2F1	OCT1_Q6	247	0.429045	1.17879	0.017	0.701618	30
HGSOC	MAGMA	NA	NA	RACCACAR_AML_Q6	253	0.457047	1.20324	0.017	0.350729	51
MOC	MAGMA	ENSG00000198081	ZF5	ZF5_01	232	0.425936	1.19239	0.017	0.553012	30
HGSOC	chromMAGMA	ENSG00000179348	GATA2	GATA2_01	101	0.386462	1.32262	0.031	0.183641	51
HGSOC	chromMAGMA	NA	NA	AP2GAMMA_01	237	0.363163	1.31848	0.002	0.189749	52
EnOC	MAGMA	NA	NA	HTF_01	71	0.487227	1.3102	0.017	0.54185	4
HGSOC	MAGMA	ENSG00000179348	GATA2	GATA2_01	104	0.471097	1.20293	0.053	0.345639	52
EnOC	MAGMA	NA	NA	T3R_Q6	244	0.417416	1.1758	0.017	0.492592	43
HGSOC	chromMAGMA	NA	NA	AACWWCAANK_UNKNOWN	136	0.375993	1.31765	0.007	0.187755	53
MOC	chromMAGMA	NA	NA	ACAWNRNSRCGG_UNKNOWN	60	0.407772	1.44717	0.018	0.0863938	18
NMOC	MAGMA	NA	NA	YTCCCRNNAGGY_UNKNOWN	67	0.539153	1.33167	0.018	0.568317	4
CCOC	chromMAGMA	NA	NA	CATRRAGC_UNKNOWN	121	0.340992	1.33091	0.018	0.106726	64
EnOC	chromMAGMA	NA	NA	GATGKMRGCG_UNKNOWN	64	0.379667	1.4079	0.018	0.119497	21
EnOC	chromMAGMA	NA	NA	YRCCAKNNGNCGC_UNKNOWN	61	0.388153	1.41395	0.018	0.122334	19
EnOC	chromMAGMA	NA	NA	KCCGNSWTTT_UNKNOWN	102	0.352522	1.34873	0.018	0.12748	42
NMOC	chromMAGMA	ENSG00000184486	POU3F2	POU3F2_01	89	0.411671	1.40878	0.018	0.141774	21
CCOC	MAGMA	NA	NA	AFP1_Q6	255	0.413262	1.17903	0.018	0.451316	46
CCOC	MAGMA	ENSG00000144852	PXR	PXR_Q2	253	0.411953	1.17025	0.018	0.452284	54
NMOC	MAGMA	ENSG00000171786	HEN1	HEN1_02	193	0.46468	1.20822	0.018	0.324481	45
NMOC	chromMAGMA	NA	NA	GGGNNTTTCC_NFKB_Q6_01	126	0.378454	1.32889	0.018	0.149688	53
NMOC	MAGMA	ENSG00000143995	MEIS1	MEIS1_01	236	0.45624	1.18595	0.018	0.358158	59
LGSOC	chromMAGMA	NA	NA	SNACANNNYSYAGA_UNKNOWN	85	0.370264	1.35526	0.018	0.147271	33
HGSOC	MAGMA	NA	NA	CAGNWMCNNNGAC_UNKNOWN	84	0.4754	1.20246	0.076	0.34191	53
EnOC	chromMAGMA	ENSG00000188786	MTF1	MTF1_Q4	231	0.3119	1.2624	0.018	0.176487	97
HGSOC	chromMAGMA	NA	NA	AML_Q6	244	0.366099	1.31681	0.002	0.186168	54
NMOC	chromMAGMA	NA	NA	AP2GAMMA_01	237	0.348335	1.25995	0.018	0.181396	104
NMOC	chromMAGMA	ENSG00000102145	GATA1	GATA1_05	262	0.344363	1.24712	0.018	0.196041	114
HGSOC	MAGMA	ENSG00000141510	P53	P53_02	237	0.455905	1.19643	0.011	0.370881	54
NMOC	chromMAGMA	ENSG00000101412	E2F1	E2F1_Q3_01	235	0.341062	1.22715	0.018	0.214064	135
LGSOC	chromMAGMA	ENSG00000099326	MZF1	MZF1_02	221	0.315067	1.24432	0.018	0.222485	97
HGSOC	chromMAGMA	NA	NA	PU1_Q6	220	0.365447	1.31295	0.007	0.191806	55
HGSOC	MAGMA	ENSG00000091831	ESR1	ER_Q6	265	0.454567	1.19602	0.011	0.366138	55
HGSOC	MAGMA	ENSG00000136352	TITF1	TITF1_Q3	233	0.453076	1.19246	0.016	0.379139	56
EnOC	MAGMA	ENSG00000141510	P53	P53_DECAMER_Q2	241	0.414735	1.16739	0.018	0.476714	52
LGSOC	MAGMA	NA	NA	HP1SITEFACTOR_Q6	222	0.436154	1.18984	0.018	0.752649	23
HGSOC	chromMAGMA	NA	NA	CCAWNWWNNNGGC_UNKNOWN	79	0.385201	1.31003	0.042	0.195455	56
CCOC	MAGMA	NA	NA	GCGSCMNTTT_UNKNOWN	68	0.475104	1.27791	0.019	0.385591	10
MOC	chromMAGMA	NA	NA	YGTCCTTGR_UNKNOWN	86	0.375758	1.38729	0.019	0.123159	26
EnOC	MAGMA	ENSG00000165556	CDX2	CDX2_Q5	247	0.414463	1.17021	0.019	0.471417	50
CCOC	MAGMA	ENSG00000126561	STAT5A	STAT5A_04	205	0.417281	1.18432	0.019	0.471602	40
NMOC	chromMAGMA	NA	NA	HMEF2_Q6	128	0.376021	1.31715	0.019	0.152566	60
LGSOC	chromMAGMA	NA	NA	CCCNNNNNNAAGWT_UNKNOWN	98	0.365962	1.3582	0.019	0.151285	31
EnOC	chromMAGMA	ENSG00000152977	ZIC1	ZIC1_01	243	0.314329	1.27838	0.019	0.169039	81
HGSOC	MAGMA	ENSG00000106331	PAX4	PAX4_01	257	0.453566	1.1908	0.011	0.382455	57
NMOC	chromMAGMA	ENSG00000171786	HEN1	HEN1_02	187	0.359596	1.2807	0.019	0.17051	85
NMOC	chromMAGMA	ENSG00000118922	AP2REP	AP2REP_01	166	0.359113	1.27271	0.019	0.176297	91
MOC	chromMAGMA	NA	NA	NERF_Q2	234	0.316713	1.25074	0.019	0.194445	102
EnOC	chromMAGMA	NA	NA	T3R_Q6	235	0.307466	1.25011	0.019	0.194673	104
MOC	chromMAGMA	ENSG00000101076	HNF4	HNF4_DR1_Q3	246	0.315595	1.24665	0.019	0.195459	107
EnOC	chromMAGMA	NA	NA	CMYB_01	240	0.308979	1.25128	0.019	0.196998	101
NMOC	chromMAGMA	ENSG00000158773	USF	USF_01	245	0.347245	1.24042	0.019	0.20318	120
NMOC	chromMAGMA	ENSG00000136352	TITF1	TITF1_Q3	224	0.34681	1.23916	0.019	0.203014	122
HGSOC	chromMAGMA	ENSG00000085276	MECOM	EVI1_05	159	0.368689	1.30846	0.02	0.195572	57
LGSOC	chromMAGMA	ENSG00000186130	ZID	ZID_01	247	0.311079	1.22431	0.019	0.238871	118
HGSOC	MAGMA	NA	NA	COUP_01	251	0.451607	1.19038	0.014	0.378171	58
HGSOC	chromMAGMA	NA	NA	AAGWWRNYGGC_UNKNOWN	114	0.378994	1.30793	0.023	0.19339	58
MOC	MAGMA	NA	NA	CCCNNGGGAR_OLF1_01	315	0.415743	1.17085	0.019	0.523871	47
HGSOC	chromMAGMA	NA	NA	NFY_Q6_01	241	0.358998	1.30777	0.006	0.190519	59
HGSOC	MAGMA	ENSG00000111012	VDR	VDR_Q6	256	0.451426	1.18864	0.016	0.382069	59
MOC	chromMAGMA	ENSG00000186951	PPARA	PPARA_01	33	0.446954	1.47734	0.0191919	0.120183	9
CCOC	MAGMA	NA	NA	NERF_Q2	238	0.414058	1.17317	0.02	0.445423	52
CCOC	MAGMA	NA	NA	COUP_DR1_Q6	231	0.419572	1.18857	0.02	0.447686	39
CCOC	MAGMA	ENSG00000107187	LHX3	LHX3_01	221	0.414534	1.1756	0.02	0.451261	49
LGSOC	MAGMA	ENSG00000165556	CDX2	CDX2_Q5	247	0.427433	1.16982	0.02	0.725918	34
NMOC	MAGMA	ENSG00000143190	POU2F1	OCT1_04	224	0.456255	1.18962	0.02	0.375191	53
NMOC	MAGMA	ENSG00000245848	CEBP	CEBP_01	262	0.446885	1.16749	0.02	0.38555	75
CCOC	chromMAGMA	ENSG00000120738	EGR1	EGR1_01	256	0.307276	1.23917	0.02	0.172771	136
HGSOC	MAGMA	NA	NA	RORA2_01	145	0.458614	1.18847	0.046	0.376701	60
EnOC	chromMAGMA	NA	NA	E2F4DP2_01	220	0.307929	1.24613	0.02	0.197636	108
MOC	chromMAGMA	ENSG00000107485	GATA3	GATA3_01	226	0.313862	1.23251	0.02	0.207025	122
NMOC	chromMAGMA	ENSG00000152977	ZIC1	ZIC1_01	243	0.339915	1.2272	0.02	0.215519	134
LGSOC	chromMAGMA	ENSG00000100105	MAZR	MAZR_01	209	0.322309	1.25594	0.02	0.222158	83
LGSOC	chromMAGMA	ENSG00000141646	SMAD4	SMAD4_Q6	224	0.317747	1.24456	0.02	0.223854	96
LGSOC	chromMAGMA	NA	NA	E2F_Q6_01	219	0.315382	1.24368	0.02	0.222103	98
LGSOC	chromMAGMA	ENSG00000111012	VDR	VDR_Q3	214	0.317181	1.24106	0.02	0.218898	103
HGSOC	chromMAGMA	ENSG00000085276	MECOM	EVI1_03	56	0.397631	1.30592	0.07	0.191662	60
HGSOC	chromMAGMA	ENSG00000171786	HEN1	HEN1_02	187	0.363641	1.30472	0.007	0.191358	61
HGSOC	MAGMA	NA	NA	AML_Q6	250	0.450698	1.18838	0.016	0.371018	61
EnOC	MAGMA	NA	NA	HNF3_Q6	180	0.422249	1.18024	0.02	0.500056	39
MOC	MAGMA	NA	NA	HOX13_01	43	0.521033	1.34417	0.02	0.725139	2
MOC	MAGMA	NA	NA	MYAATNNNNNNNGGC_UNKNOWN	107	0.459999	1.2427	0.02	0.691931	10
EnOC	chromMAGMA	ENSG00000106546	AHR	AHR_01	53	0.389819	1.40644	0.02002	0.106728	24
MOC	chromMAGMA	ENSG00000132170	PPARG	PPARG_01	44	0.423687	1.47469	0.02002	0.11206	10
NMOC	MAGMA	NA	NA	RGTTAMWNATT_HNF1_01	70	0.527942	1.31454	0.021	0.318812	9
CCOC	chromMAGMA	ENSG00000186951	PPARA	PPARA_02	123	0.338359	1.31311	0.021	0.125062	70
EnOC	chromMAGMA	NA	NA	TAXCREB_01	129	0.339327	1.32484	0.021	0.134822	54
MOC	chromMAGMA	NA	NA	TMTCGCGANR_UNKNOWN	159	0.332824	1.28513	0.021	0.159464	78
MOC	chromMAGMA	ENSG00000187140	FOXD3	FOXD3_01	175	0.324794	1.26861	0.021	0.176733	88
EnOC	chromMAGMA	NA	NA	E2F_02	221	0.307108	1.2386	0.021	0.198614	119
NMOC	chromMAGMA	NA	NA	ETS_Q4	236	0.344632	1.24948	0.021	0.193522	112
MOC	chromMAGMA	ENSG00000148516	AREB6	AREB6_03	244	0.311082	1.23415	0.021	0.207602	119
NMOC	chromMAGMA	ENSG00000158773	USF	USF_Q6_01	231	0.341709	1.23154	0.021	0.211689	129
NMOC	chromMAGMA	ENSG00000178573	MAF	MAF_Q6	244	0.34025	1.23121	0.021	0.210923	130
MOC	chromMAGMA	ENSG00000125482	TTF1	TTF1_Q6	237	0.31089	1.22788	0.021	0.216469	124
LGSOC	chromMAGMA	ENSG00000171634	FAC1	FAC1_01	196	0.325824	1.27139	0.021	0.226228	66
NMOC	chromMAGMA	ENSG00000185630	PBX1	PBX1_01	233	0.339837	1.22158	0.021	0.214073	145
LGSOC	MAGMA	ENSG00000143190	POU2F1	OCT1_B	242	0.428285	1.17679	0.021	0.660718	33
MOC	MAGMA	ENSG00000143190	POU2F1	OCT1_06	243	0.418019	1.16938	0.021	0.527105	48
MOC	MAGMA	NA	NA	ATCMNTCCGY_UNKNOWN	51	0.510382	1.32069	0.021	0.516594	4
EnOC	MAGMA	NA	NA	ERR1_Q2	252	0.408718	1.15422	0.021	0.500162	63
EnOC	MAGMA	NA	NA	PAX_Q6	243	0.40953	1.15814	0.021	0.515243	57
CCOC	chromMAGMA	NA	NA	ACAWNRNSRCGG_UNKNOWN	60	0.380136	1.38476	0.022	0.0922302	36
CCOC	chromMAGMA	NA	NA	GGCNKCCATNK_UNKNOWN	116	0.339713	1.30723	0.022	0.124783	76
HGSOC	chromMAGMA	NA	NA	TFIII_Q6	193	0.363542	1.30082	0.008	0.197227	62
CCOC	MAGMA	NA	NA	NFY_01	239	0.416949	1.1795	0.022	0.457411	45
CCOC	MAGMA	ENSG00000091831	ESR1	ER_Q6	265	0.406885	1.16116	0.022	0.47212	61
CCOC	MAGMA	ENSG00000136352	TITF1	TITF1_Q3	233	0.412452	1.16292	0.022	0.480035	58
NMOC	MAGMA	ENSG00000112592	TBP	TBP_01	232	0.451288	1.17355	0.022	0.383543	68
EnOC	MAGMA	ENSG00000120690	ELF1	ELF1_Q6	236	0.414696	1.17446	0.022	0.482968	45
MOC	chromMAGMA	ENSG00000158022	IRF	IRF_Q6	228	0.315225	1.24563	0.022	0.19258	110
EnOC	chromMAGMA	NA	NA	NFKAPPAB_01	237	0.307331	1.25083	0.022	0.196509	102
EnOC	chromMAGMA	ENSG00000231924	SP1	SP1_Q4_01	243	0.30479	1.23546	0.022	0.200591	123
NMOC	chromMAGMA	ENSG00000167825	OLF1	OLF1_01	248	0.340475	1.22519	0.022	0.21351	139
HGSOC	MAGMA	NA	NA	TGATTTRY_GFI1_01	276	0.449789	1.18787	0.015	0.367953	62
HGSOC	chromMAGMA	ENSG00000106331	PAX4	PAX4_04	199	0.361206	1.29572	0.016	0.205944	63
EnOC	MAGMA	ENSG00000125347	IRF1	IRF1_01	240	0.413778	1.17022	0.022	0.480997	49
MOC	MAGMA	ENSG00000186951	PPAR	PPAR_DR1_Q2	249	0.420075	1.16649	0.022	0.522947	51
MOC	MAGMA	ENSG00000125482	TTF1	TTF1_Q6	250	0.418143	1.16341	0.022	0.520751	54
HGSOC	MAGMA	NA	NA	CDPCR3HD_01	227	0.454021	1.18768	0.019	0.363161	63
HGSOC	chromMAGMA	ENSG00000101076	HNF4	HNF4_01_B	235	0.357835	1.29464	0.011	0.205665	64
MOC	MAGMA	NA	NA	WWTAAGGC_UNKNOWN	139	0.440293	1.20721	0.022	0.578434	22
CCOC	MAGMA	NA	NA	GGGNNTTTCC_NFKB_Q6_01	131	0.433388	1.20636	0.023	0.408672	31
NMOC	MAGMA	ENSG00000184486	POU3F2	POU3F2_01	99	0.499593	1.25559	0.023	0.344989	20
EnOC	chromMAGMA	NA	NA	GGGNNTTTCC_NFKB_Q6_01	126	0.3294	1.29444	0.023	0.144836	76
NMOC	MAGMA	ENSG00000115297	NCX	NCX_01	171	0.465309	1.20153	0.023	0.347634	47
HGSOC	MAGMA	NA	NA	AP3_Q6	235	0.450687	1.18718	0.017	0.360409	64
NMOC	chromMAGMA	NA	NA	CDPCR1_01	115	0.374778	1.28958	0.023	0.170153	76
CCOC	chromMAGMA	ENSG00000148516	AREB6	AREB6_04	228	0.30833	1.23934	0.023	0.173725	135
NMOC	MAGMA	NA	NA	RACCACAR_AML_Q6	253	0.445414	1.16389	0.023	0.378894	81
CCOC	chromMAGMA	ENSG00000108091	TST1	TST1_01	229	0.306419	1.23355	0.023	0.182502	139
MOC	chromMAGMA	ENSG00000106546	AHR	AHR_Q5	202	0.318265	1.24874	0.023	0.193798	105
HGSOC	MAGMA	ENSG00000143190	POU2F1	OCT1_01	244	0.452331	1.18601	0.03	0.36205	65
EnOC	chromMAGMA	NA	NA	E2F1DP1_01	220	0.307929	1.23595	0.023	0.202542	121
CCOC	chromMAGMA	ENSG00000143437	ARNT	ARNT_01	253	0.301291	1.22097	0.023	0.205244	146
MOC	chromMAGMA	NA	NA	E2F_03	229	0.311764	1.233	0.023	0.207431	121
MOC	chromMAGMA	NA	NA	SMAD_Q6	240	0.31308	1.23717	0.023	0.207867	114
NMOC	chromMAGMA	ENSG00000137309	HMGIY	HMGIY_Q6	231	0.345711	1.23794	0.023	0.202919	124
CCOC	chromMAGMA	NA	NA	CCCNNGGGAR_OLF1_01	302	0.296599	1.21151	0.023	0.217329	156
NMOC	chromMAGMA	NA	NA	RRAGTTGT_UNKNOWN	230	0.341179	1.2302	0.023	0.210425	132
HGSOC	chromMAGMA	NA	NA	ACTWSNACTNY_UNKNOWN	100	0.375298	1.29348	0.044	0.205764	65
LGSOC	chromMAGMA	ENSG00000115966	CREBP1	CREBP1_01	167	0.327568	1.25729	0.023	0.229012	79
LGSOC	chromMAGMA	NA	NA	COUP_DR1_Q6	227	0.31184	1.2375	0.023	0.221067	107
NMOC	chromMAGMA	NA	NA	GCTNWTTGK_UNKNOWN	291	0.336169	1.22495	0.023	0.212678	140
HGSOC	chromMAGMA	ENSG00000112658	SRF	SRF_C	199	0.357091	1.29092	0.018	0.209195	66
LGSOC	chromMAGMA	ENSG00000154727	NRF2	NRF2_01	262	0.311399	1.22649	0.023	0.239932	114
HGSOC	MAGMA	NA	NA	COUP_DR1_Q6	231	0.451869	1.18589	0.022	0.357367	66
LGSOC	chromMAGMA	NA	NA	AP2GAMMA_01	237	0.311314	1.22143	0.023	0.237735	123
EnOC	MAGMA	ENSG00000168310	IRF2	IRF2_01	122	0.438811	1.20404	0.023	0.436659	29
HGSOC	chromMAGMA	NA	NA	ETS_Q4	236	0.35495	1.28835	0.009	0.212927	67
HGSOC	MAGMA	ENSG00000141646	SMAD4	SMAD4_Q6	233	0.449893	1.1855	0.029	0.354258	67
MOC	MAGMA	ENSG00000143190	POU2F1	OCT1_04	224	0.422743	1.17765	0.023	0.49244	44
HGSOC	MAGMA	NA	NA	CACBINDINGPROTEIN_Q6	238	0.449218	1.18511	0.025	0.351239	68
CCOC	MAGMA	NA	NA	LXR_DR4_Q3	89	0.460003	1.25409	0.024	0.430558	13
MOC	chromMAGMA	ENSG00000185630	PBX1	PBX1_02	117	0.346297	1.30213	0.024	0.145371	68
CCOC	MAGMA	ENSG00000245848	CEBPA	CEBPA_01	245	0.414387	1.17963	0.024	0.466579	44
MOC	chromMAGMA	ENSG00000082175	PGR	PR_01	137	0.338417	1.29422	0.024	0.15067	73
NMOC	chromMAGMA	NA	NA	GGAANCGGAANY_UNKNOWN	105	0.384912	1.32967	0.024	0.150854	52
LGSOC	chromMAGMA	NA	NA	YRCCAKNNGNCGC_UNKNOWN	61	0.381509	1.37152	0.024	0.164391	24
CCOC	chromMAGMA	NA	NA	PTF1BETA_Q6	221	0.310768	1.24872	0.024	0.166031	125
CCOC	chromMAGMA	ENSG00000115415	STAT1	STAT1_03	232	0.307118	1.24638	0.024	0.168183	127
NMOC	MAGMA	ENSG00000185811	LYF1	LYF1_01	259	0.447839	1.17275	0.024	0.377257	70
NMOC	MAGMA	NA	NA	TGATTTRY_GFI1_01	276	0.448663	1.16822	0.024	0.385557	74
NMOC	MAGMA	ENSG00000185630	PBX1	PBX1_01	249	0.446543	1.16749	0.024	0.380476	76
CCOC	chromMAGMA	ENSG00000158773	USF	USF_Q6_01	231	0.306536	1.24066	0.024	0.174631	132
NMOC	MAGMA	NA	NA	HP1SITEFACTOR_Q6	222	0.448096	1.16422	0.024	0.381505	80
HGSOC	chromMAGMA	NA	NA	WYAAANNRNNNGCG_UNKNOWN	58	0.391565	1.28812	0.093	0.210428	68
CCOC	chromMAGMA	ENSG00000175197	CHOP	CHOP_01	208	0.308241	1.23388	0.024	0.183007	138
MOC	chromMAGMA	ENSG00000172216	CEBPB	CEBPB_01	247	0.308669	1.22651	0.024	0.218261	125
LGSOC	chromMAGMA	ENSG00000187555	TEF1	TEF1_Q6	212	0.317608	1.24667	0.024	0.227061	92
LGSOC	chromMAGMA	ENSG00000100811	YY1	YY1_Q6	233	0.311691	1.23738	0.024	0.219418	108
LGSOC	chromMAGMA	ENSG00000117505	DR1	DR1_Q3	235	0.314237	1.23349	0.024	0.22499	111
HGSOC	chromMAGMA	ENSG00000231924	SP1	SP1_01	227	0.355126	1.28293	0.012	0.221009	69
LGSOC	chromMAGMA	ENSG00000104689	TNFRSF10A	DR4_Q2	248	0.309868	1.22524	0.024	0.239833	116
LGSOC	chromMAGMA	ENSG00000214022	AP4	AP4_Q5	242	0.310039	1.22278	0.024	0.237431	121
HGSOC	MAGMA	NA	NA	TCF1P_Q6	256	0.449234	1.18415	0.017	0.351208	69
LGSOC	MAGMA	ENSG00000140968	ICSBP	ICSBP_Q6	244	0.425889	1.16591	0.024	0.756415	35
MOC	MAGMA	ENSG00000143190	POU2F1	OCT1_01	244	0.423619	1.17811	0.024	0.5001	43
MOC	chromMAGMA	ENSG00000074219	ETF	ETF_Q6	110	0.353027	1.32584	0.025	0.133638	54
LGSOC	MAGMA	ENSG00000122861	ATF	ATF_01	253	0.422384	1.16457	0.025	0.752267	36
MOC	chromMAGMA	ENSG00000012504	FXR	FXR_IR1_Q6	99	0.349754	1.31333	0.025	0.141598	60
CCOC	chromMAGMA	ENSG00000231924	SP1	SP1_01	227	0.312545	1.25168	0.025	0.166307	120
NMOC	chromMAGMA	ENSG00000185630	PBX1	PBX1_02	117	0.376659	1.30536	0.025	0.155686	68
MOC	chromMAGMA	NA	NA	TAAYNRNNTCC_UNKNOWN	153	0.326853	1.2646	0.025	0.180588	91
HGSOC	MAGMA	ENSG00000100105	MAZR	MAZR_01	216	0.450725	1.18316	0.029	0.352121	70
NMOC	MAGMA	NA	NA	CETS1P54_01	256	0.440601	1.15318	0.025	0.399251	92
EnOC	chromMAGMA	ENSG00000177606	AP1	AP1_C	257	0.305236	1.2431	0.025	0.193794	115
EnOC	MAGMA	ENSG00000134954	ETS1	ETS1_B	253	0.409594	1.15577	0.025	0.510867	60
EnOC	chromMAGMA	ENSG00000106331	PAX4	PAX4_03	238	0.306742	1.24332	0.025	0.19835	112
EnOC	chromMAGMA	ENSG00000072310	SREBP1	SREBP1_Q6	235	0.307969	1.2399	0.025	0.200551	116
CCOC	chromMAGMA	NA	NA	NFY_C	223	0.300817	1.2202	0.025	0.205988	147
NMOC	chromMAGMA	ENSG00000089558	ELK1	ELK1_02	243	0.33967	1.22963	0.025	0.210294	133
LGSOC	chromMAGMA	ENSG00000214022	AP4	AP4_Q6	199	0.324939	1.25753	0.025	0.23132	78
LGSOC	chromMAGMA	ENSG00000122034	AP2	AP2_Q3	235	0.312236	1.23395	0.025	0.225608	110
LGSOC	chromMAGMA	NA	NA	AP2ALPHA_01	226	0.310837	1.22433	0.025	0.24087	117
LGSOC	chromMAGMA	NA	NA	MYCMAX_03	242	0.307036	1.21278	0.025	0.258304	127
NMOC	chromMAGMA	NA	NA	TGCTGAY_UNKNOWN	478	0.316582	1.17418	0.025	0.263504	212
LGSOC	MAGMA	ENSG00000133110	POSTN	OSF2_Q6	258	0.422838	1.15979	0.025	0.796732	37
HGSOC	chromMAGMA	NA	NA	CCGNMNNTNACG_UNKNOWN	76	0.381212	1.27997	0.063	0.225698	70
EnOC	chromMAGMA	NA	NA	YTTCCNNNGGAMR_UNKNOWN	48	0.399223	1.41648	0.025025	0.125628	18
LGSOC	chromMAGMA	ENSG00000168610	STAT3	STAT3_01	21	0.484126	1.48724	0.0254582	0.130081	7
CCOC	MAGMA	NA	NA	CATRRAGC_UNKNOWN	131	0.43772	1.21287	0.026	0.418687	27
NMOC	chromMAGMA	NA	NA	TAANNYSGCG_UNKNOWN	76	0.40478	1.35491	0.026	0.151829	38
LGSOC	chromMAGMA	NA	NA	CCAWYNNGAAR_UNKNOWN	131	0.343589	1.30832	0.026	0.187738	48
MOC	chromMAGMA	ENSG00000103495	MAZ	MAZ_Q6	178	0.321699	1.25482	0.026	0.187487	100
EnOC	chromMAGMA	ENSG00000089558	ELK1	ELK1_02	243	0.304633	1.23527	0.026	0.199555	124
EnOC	chromMAGMA	NA	NA	E2F_Q4	219	0.304337	1.22825	0.026	0.209248	130
MOC	chromMAGMA	ENSG00000184486	POU3F2	POU3F2_02	228	0.311107	1.22372	0.026	0.214148	132
MOC	chromMAGMA	NA	NA	LFA1_Q6	236	0.311322	1.22566	0.026	0.217427	127
LGSOC	chromMAGMA	ENSG00000123268	ATF1	ATF1_Q6	219	0.321239	1.2595	0.026	0.230772	76
EnOC	MAGMA	ENSG00000231924	SP1	SP1_Q2_01	241	0.411669	1.16232	0.026	0.494882	55
EnOC	MAGMA	ENSG00000100726	TELO2	TEL2_Q6	231	0.412737	1.16294	0.026	0.498731	54
HGSOC	chromMAGMA	NA	NA	SMAD_Q6	240	0.352669	1.27988	0.007	0.222857	71
EnOC	chromMAGMA	ENSG00000075891	PAX2	PAX2_01	53	0.388554	1.40734	0.026026	0.114929	22
CCOC	chromMAGMA	NA	NA	WYAAANNRNNNGCG_UNKNOWN	58	0.381938	1.40162	0.027	0.0813616	33
CCOC	chromMAGMA	NA	NA	GTTGNYNNRGNAAC_UNKNOWN	101	0.344627	1.31491	0.027	0.127337	67
NMOC	chromMAGMA	NA	NA	SNACANNNYSYAGA_UNKNOWN	85	0.395557	1.3416	0.027	0.144361	47
CCOC	chromMAGMA	ENSG00000100105	MAZR	MAZR_01	209	0.310997	1.24999	0.027	0.16849	121
HGSOC	MAGMA	ENSG00000148516	AREB6	AREB6_02	246	0.449647	1.18211	0.022	0.352908	71
MOC	chromMAGMA	NA	NA	STTTCRNTTT_IRF_Q6	178	0.325654	1.26037	0.027	0.181357	96
NMOC	MAGMA	NA	NA	NFKAPPAB_01	244	0.443119	1.15801	0.027	0.385134	88
NMOC	chromMAGMA	ENSG00000064835	POU1F1	PIT1_Q6	210	0.352594	1.26806	0.027	0.177109	96
EnOC	chromMAGMA	ENSG00000158773	USF	USF_Q6_01	231	0.301249	1.22471	0.027	0.214519	133
NMOC	chromMAGMA	NA	NA	NFY_01	238	0.340636	1.23119	0.027	0.209389	131
NMOC	chromMAGMA	NA	NA	PU1_Q6	220	0.342601	1.22608	0.027	0.21421	137
EnOC	chromMAGMA	ENSG00000177606	AP1	AP1_Q4	261	0.299887	1.21963	0.027	0.225461	135
MOC	chromMAGMA	ENSG00000134954	ETS1	ETS1_B	249	0.306167	1.21593	0.027	0.227151	138
HGSOC	chromMAGMA	ENSG00000111012	VDR	VDR_Q3	214	0.349826	1.274	0.019	0.237215	72
EnOC	chromMAGMA	NA	NA	CREL_01	243	0.301078	1.21398	0.027	0.232465	141
MOC	MAGMA	ENSG00000135100	HNF1	HNF1_C	239	0.412381	1.15002	0.027	0.529849	67
HGSOC	MAGMA	NA	NA	TGTYNNNNNRGCARM_UNKNOWN	83	0.466839	1.18189	0.103	0.349243	72
EnOC	MAGMA	ENSG00000085276	MECOM	EVI1_05	169	0.426883	1.18548	0.027	0.522351	34
LGSOC	chromMAGMA	ENSG00000089558	ELK1	ELK1_02	243	0.306969	1.20773	0.027	0.263451	133
MOC	MAGMA	ENSG00000231924	SP1	SP1_01	232	0.418125	1.16165	0.027	0.527795	55
EnOC	MAGMA	ENSG00000156925	ZIC3	ZIC3_01	250	0.407542	1.1541	0.027	0.493378	64
NMOC	MAGMA	NA	NA	TTGCWCAAY_CEBPB_02	62	0.527511	1.2995	0.028	0.324579	11
CCOC	MAGMA	NA	NA	AACYNNNNTTCCS_UNKNOWN	94	0.449625	1.23807	0.028	0.430037	17
NMOC	MAGMA	ENSG00000072310	SREBP1	SREBP1_02	84	0.502116	1.26506	0.028	0.349685	17
EnOC	chromMAGMA	NA	NA	CATRRAGC_UNKNOWN	121	0.335352	1.29538	0.028	0.14518	75
NMOC	chromMAGMA	NA	NA	YWATTWNNRGCT_UNKNOWN	66	0.408371	1.3649	0.028	0.153914	33
CCOC	MAGMA	ENSG00000135100	HNF1	HNF1_C	239	0.408947	1.15893	0.028	0.475469	63
NMOC	chromMAGMA	ENSG00000215788	TNFRSF25	DR3_Q4	136	0.372033	1.31063	0.028	0.155067	64
CCOC	MAGMA	ENSG00000102145	GATA1	GATA1_05	270	0.407436	1.15526	0.028	0.485151	66
CCOC	chromMAGMA	ENSG00000100811	YY1	YY1_Q6	233	0.310271	1.24381	0.028	0.171623	129
CCOC	chromMAGMA	ENSG00000099326	MZF1	MZF1_02	221	0.306428	1.24037	0.028	0.172725	134
MOC	chromMAGMA	ENSG00000113580	GR	GR_01	184	0.320772	1.24581	0.028	0.193907	109
NMOC	chromMAGMA	ENSG00000231924	SP1	SP1_01	227	0.344524	1.23698	0.028	0.203897	125
EnOC	chromMAGMA	NA	NA	TGACGTCA_ATF3_Q6	219	0.303019	1.22521	0.028	0.216419	131
MOC	chromMAGMA	NA	NA	PAX_Q6	231	0.310692	1.22437	0.028	0.217486	129
NMOC	chromMAGMA	ENSG00000125347	IRF1	IRF1_Q6	235	0.341194	1.22472	0.028	0.211844	141
MOC	chromMAGMA	NA	NA	NFKAPPAB_01	237	0.308753	1.21398	0.028	0.230971	139
NMOC	chromMAGMA	ENSG00000140968	ICSBP	ICSBP_Q6	236	0.339014	1.22125	0.028	0.21197	147
LGSOC	chromMAGMA	NA	NA	AML_Q6	244	0.310601	1.22573	0.028	0.240369	115
MOC	chromMAGMA	ENSG00000231924	SP1	SP1_Q6	245	0.305095	1.20946	0.028	0.238208	143
HGSOC	chromMAGMA	ENSG00000132005	EFC	EFC_Q6	245	0.351288	1.27347	0.012	0.235747	73
MOC	chromMAGMA	ENSG00000120738	EGR1	EGR1_01	256	0.304276	1.20433	0.028	0.246417	148
HGSOC	MAGMA	ENSG00000143995	MEIS1	MEIS1_01	236	0.450523	1.18179	0.028	0.34524	73
HGSOC	chromMAGMA	ENSG00000215788	TNFRSF25	DR3_Q4	136	0.362206	1.27323	0.036	0.233211	74
HGSOC	MAGMA	NA	NA	GGCNRNWCTTYS_UNKNOWN	81	0.468718	1.18151	0.099	0.342169	74
EnOC	MAGMA	NA	NA	GATGKMRGCG_UNKNOWN	64	0.479171	1.27203	0.028	0.494962	8
HGSOC	chromMAGMA	ENSG00000154727	NRF2	NRF2_01	262	0.350024	1.27259	0.011	0.232262	75
HGSOC	MAGMA	ENSG00000101076	HNF4	HNF4_01	256	0.447658	1.18059	0.024	0.342768	75
HGSOC	MAGMA	ENSG00000143190	POU2F1	OCT1_07	156	0.455614	1.17986	0.052	0.342311	76
MOC	MAGMA	ENSG00000177606	AP1	AP1_Q4	264	0.411327	1.14963	0.029	0.525676	68
NMOC	MAGMA	NA	NA	WYAAANNRNNNGCG_UNKNOWN	63	0.535515	1.323	0.029	0.428716	6
NMOC	MAGMA	NA	NA	MEIS1BHOXA9_01	140	0.473112	1.21174	0.029	0.320687	43
NMOC	chromMAGMA	NA	NA	GGCNRNWCTTYS_UNKNOWN	81	0.397774	1.34188	0.029	0.147282	46
LGSOC	chromMAGMA	NA	NA	TAANNYSGCG_UNKNOWN	76	0.375519	1.36114	0.029	0.15606	29
CCOC	MAGMA	NA	NA	AMEF2_Q6	245	0.405359	1.15093	0.029	0.48767	71
HGSOC	chromMAGMA	NA	NA	GGARNTKYCCA_UNKNOWN	71	0.381894	1.27258	0.076	0.229219	76
NMOC	MAGMA	ENSG00000138795	LEF1	LEF1_Q6	255	0.444934	1.16425	0.029	0.386233	79
NMOC	MAGMA	NA	NA	RRAGTTGT_UNKNOWN	243	0.446136	1.16133	0.029	0.368086	87
NMOC	MAGMA	NA	NA	TCF1P_Q6	256	0.441112	1.15222	0.029	0.389325	96
NMOC	MAGMA	ENSG00000125482	TTF1	TTF1_Q6	250	0.439331	1.14924	0.029	0.400821	98
EnOC	chromMAGMA	NA	NA	E2F1DP2_01	220	0.307929	1.24331	0.029	0.196621	113
EnOC	chromMAGMA	ENSG00000187555	TEF1	TEF1_Q6	212	0.306075	1.2355	0.029	0.20217	122
CCOC	chromMAGMA	ENSG00000165417	GTF2A1	TFIIA_Q6	238	0.300556	1.21745	0.029	0.210725	149
NMOC	chromMAGMA	ENSG00000122034	AP2	AP2_Q6	246	0.337675	1.22051	0.029	0.212566	148
HGSOC	MAGMA	ENSG00000136574	GATA4	GATA4_Q3	239	0.449818	1.17899	0.023	0.342983	77
HGSOC	chromMAGMA	NA	NA	CCAWWNAAGG_SRF_Q4	75	0.373287	1.27084	0.067	0.231336	77
HGSOC	chromMAGMA	NA	NA	CACCCBINDINGFACTOR_Q6	254	0.348677	1.27049	0.008	0.229499	78
HGSOC	MAGMA	ENSG00000196628	TCF4	TCF4_Q5	228	0.447892	1.17783	0.031	0.345087	78
HGSOC	MAGMA	ENSG00000099326	MZF1	MZF1_02	230	0.448472	1.17573	0.035	0.351886	79
MOC	MAGMA	NA	NA	GGAANCGGAANY_UNKNOWN	105	0.456954	1.23067	0.029	0.709472	12
CCOC	chromMAGMA	NA	NA	GKCGCNNNNNNNTGAYG_UNKNOWN	54	0.394208	1.41607	0.03	0.100146	23
CCOC	chromMAGMA	NA	NA	PAX_Q6	231	0.298927	1.20961	0.03	0.217177	160
NMOC	chromMAGMA	NA	NA	GCCATNTTG_YY1_Q6	415	0.319591	1.17025	0.03	0.270056	217
HGSOC	chromMAGMA	NA	NA	TAANNYSGCG_UNKNOWN	76	0.372733	1.26827	0.086	0.232989	79
MOC	MAGMA	ENSG00000198081	ZF5	ZF5_B	233	0.420754	1.17242	0.03	0.519821	46
LGSOC	MAGMA	NA	NA	CATRRAGC_UNKNOWN	131	0.453145	1.2184	0.03	0.943523	11
LGSOC	chromMAGMA	NA	NA	ATCMNTCCGY_UNKNOWN	50	0.406775	1.41734	0.03003	0.168951	13
NMOC	MAGMA	NA	NA	RYAAAKNNNNNNTTGW_UNKNOWN	81	0.502697	1.25583	0.031	0.361672	19
NMOC	chromMAGMA	ENSG00000257923	CDP	CDP_02	94	0.388327	1.33133	0.031	0.150419	51
NMOC	MAGMA	NA	NA	RTTTNNNYTGGM_UNKNOWN	151	0.464328	1.18979	0.031	0.381599	52
CCOC	MAGMA	ENSG00000162676	GFI1	GFI1_01	251	0.404086	1.14848	0.031	0.482719	75
NMOC	MAGMA	ENSG00000115415	STAT1	STAT1_02	247	0.448063	1.17144	0.031	0.380183	71
NMOC	MAGMA	ENSG00000112658	SRF	SRF_Q5_01	215	0.449485	1.16952	0.031	0.386766	72
NMOC	chromMAGMA	ENSG00000103495	MAZ	MAZ_Q6	178	0.355178	1.26618	0.031	0.179728	97
MOC	MAGMA	ENSG00000089558	ELK1	ELK1_02	243	0.412222	1.15043	0.031	0.541967	65
HGSOC	chromMAGMA	ENSG00000124782	RREB1	RREB1_01	197	0.350847	1.26716	0.027	0.233415	80
HGSOC	MAGMA	NA	NA	ALPHACP1_01	247	0.445012	1.17315	0.031	0.362578	80
EnOC	chromMAGMA	NA	NA	EGR_Q6	260	0.295511	1.21535	0.031	0.2317	139
HGSOC	MAGMA	ENSG00000135100	HNF1	HNF1_01	235	0.444512	1.17001	0.028	0.375808	81
LGSOC	chromMAGMA	NA	NA	GABP_B	259	0.305858	1.20882	0.031	0.263509	131
LGSOC	chromMAGMA	NA	NA	SMAD_Q6	240	0.306206	1.2075	0.031	0.262247	134
HGSOC	chromMAGMA	NA	NA	CGTSACG_PAX3_B	146	0.358632	1.26693	0.038	0.231213	81
HGSOC	chromMAGMA	NA	NA	AP2ALPHA_01	226	0.351933	1.2662	0.017	0.230785	82
EnOC	MAGMA	ENSG00000108091	TST1	TST1_01	242	0.406555	1.14975	0.031	0.495299	69
HGSOC	MAGMA	ENSG00000076356	OCT	OCT_C	237	0.44367	1.16994	0.029	0.371664	82
MOC	MAGMA	NA	NA	WTTGKCTG_UNKNOWN	491	0.392318	1.11435	0.031	0.667783	98
MOC	chromMAGMA	NA	NA	KMCATNNWGGA_UNKNOWN	90	0.352858	1.30044	0.032	0.140069	72
CCOC	MAGMA	ENSG00000158773	USF	USF_C	277	0.402096	1.14863	0.032	0.488012	74
MOC	chromMAGMA	ENSG00000186951	PPARA	PPARA_02	123	0.334829	1.27011	0.032	0.174999	87
NMOC	MAGMA	ENSG00000091831	ESR1	ER_Q6	265	0.445314	1.16248	0.032	0.365552	86
NMOC	chromMAGMA	ENSG00000112658	SRF	SRF_C	199	0.348194	1.24138	0.032	0.202315	119
LGSOC	chromMAGMA	ENSG00000112658	SRF	SRF_Q4	207	0.316055	1.24225	0.032	0.217631	102
EnOC	chromMAGMA	ENSG00000158773	USF	USF_Q6	245	0.300615	1.2162	0.032	0.230783	138
NMOC	chromMAGMA	ENSG00000115415	STAT1	STAT1_03	232	0.3404	1.22138	0.032	0.213196	146
NMOC	chromMAGMA	ENSG00000115415	STAT1	STAT1_02	242	0.336661	1.21204	0.032	0.22908	153
LGSOC	chromMAGMA	ENSG00000125952	MAX	MAX_01	249	0.308241	1.21363	0.032	0.257615	126
HGSOC	chromMAGMA	ENSG00000158773	USF	USF_Q6	245	0.348587	1.26513	0.005	0.231078	83
HGSOC	MAGMA	NA	NA	YATTNATC_UNKNOWN	363	0.439285	1.16919	0.011	0.371802	83
HGSOC	chromMAGMA	NA	NA	RRAGTTGT_UNKNOWN	230	0.350806	1.26491	0.022	0.229041	84
EnOC	MAGMA	ENSG00000231924	SP1	SP1_Q6_01	237	0.408223	1.15318	0.032	0.494219	65
HGSOC	MAGMA	NA	NA	TTTNNANAGCYR_UNKNOWN	84	0.459558	1.16826	0.121	0.372996	84
EnOC	MAGMA	NA	NA	HFH8_01	199	0.417566	1.16977	0.032	0.465959	51
HGSOC	chromMAGMA	ENSG00000143190	POU2F1	OCT1_05	218	0.352772	1.2647	0.015	0.226853	85
NMOC	chromMAGMA	NA	NA	YAATNRNNNYNATT_UNKNOWN	91	0.383657	1.31684	0.033	0.150459	61
MOC	MAGMA	ENSG00000105516	DBP	DBP_Q6	248	0.416426	1.16368	0.033	0.528312	53
NMOC	MAGMA	ENSG00000124782	RREB1	RREB1_01	204	0.448928	1.16463	0.033	0.388761	78
NMOC	MAGMA	ENSG00000136574	GATA4	GATA4_Q3	239	0.44378	1.15279	0.033	0.389233	95
MOC	chromMAGMA	ENSG00000118513	MYB	MYB_Q3	233	0.307543	1.22225	0.033	0.213473	135
CCOC	chromMAGMA	NA	NA	MYCMAX_B	255	0.298879	1.21179	0.033	0.217938	155
LGSOC	chromMAGMA	ENSG00000171786	HEN1	HEN1_02	187	0.315098	1.22241	0.033	0.236576	122
MOC	chromMAGMA	ENSG00000101412	E2F1	E2F1_Q3_01	235	0.305171	1.20677	0.033	0.243498	145
LGSOC	chromMAGMA	ENSG00000167967	E4F1	E4F1_Q6	267	0.30787	1.2188	0.033	0.243993	124
HGSOC	MAGMA	NA	NA	GGGNRMNNYCAT_UNKNOWN	78	0.460838	1.16689	0.124	0.377139	85
LGSOC	chromMAGMA	ENSG00000166888	STAT6	STAT6_01	239	0.307703	1.21224	0.033	0.2581	128
LGSOC	chromMAGMA	ENSG00000089558	ELK1	ELK1_01	260	0.301731	1.19805	0.033	0.276971	143
LGSOC	MAGMA	ENSG00000112658	SRF	SRF_C	206	0.418447	1.14629	0.033	0.893036	42
EnOC	MAGMA	NA	NA	GGAMTNNNNNTCCY_UNKNOWN	110	0.437703	1.20064	0.033	0.447807	30
LGSOC	MAGMA	NA	NA	GGCNKCCATNK_UNKNOWN	117	0.453431	1.21761	0.033	0.876647	12
HGSOC	chromMAGMA	ENSG00000012504	FXR	FXR_IR1_Q6	99	0.367864	1.26383	0.071	0.2266	86
NMOC	MAGMA	ENSG00000163064	EN1	EN1_01	109	0.484029	1.23646	0.034	0.321313	29
CCOC	MAGMA	ENSG00000176678	FREAC7	FREAC7_01	187	0.411506	1.16192	0.034	0.473403	60
CCOC	MAGMA	ENSG00000186951	PPAR	PPAR_DR1_Q2	249	0.406161	1.15211	0.034	0.484334	70
LGSOC	MAGMA	ENSG00000118260	CREB	CREB_Q4	260	0.41907	1.14481	0.034	0.873629	44
HGSOC	MAGMA	ENSG00000257923	CDP	CDP_01	89	0.456582	1.16569	0.101	0.379964	86
NMOC	chromMAGMA	NA	NA	CYTAGCAAY_UNKNOWN	138	0.360961	1.27949	0.034	0.169453	87
NMOC	MAGMA	NA	NA	CEBPGAMMA_Q6	242	0.440446	1.15222	0.034	0.385342	97
EnOC	chromMAGMA	NA	NA	E2F_Q6	216	0.305333	1.23221	0.034	0.203381	127
NMOC	chromMAGMA	ENSG00000143190	POU2F1	OCT1_01	228	0.345255	1.23952	0.034	0.203758	121
CCOC	chromMAGMA	NA	NA	NERF_Q2	234	0.302173	1.21588	0.034	0.213562	150
MOC	chromMAGMA	NA	NA	NFY_C	223	0.312721	1.22515	0.034	0.217266	128
LGSOC	chromMAGMA	NA	NA	TAXCREB_01	129	0.335607	1.27537	0.034	0.224215	63
EnOC	chromMAGMA	ENSG00000118513	MYB	MYB_Q3	233	0.300569	1.21216	0.034	0.231435	145
NMOC	chromMAGMA	NA	NA	CETS1P54_01	254	0.335424	1.20935	0.034	0.231883	156
EnOC	MAGMA	ENSG00000185507	IRF7	IRF7_01	241	0.408029	1.14593	0.034	0.495474	74
HGSOC	chromMAGMA	NA	NA	MYCMAX_03	242	0.34833	1.26133	0.024	0.231275	87
EnOC	MAGMA	ENSG00000115415	STAT1	STAT1_01	65	0.468779	1.25272	0.034	0.601657	9
CCOC	MAGMA	ENSG00000164299	SPZ1	SPZ1_01	227	0.410644	1.16713	0.035	0.461512	56
CCOC	MAGMA	NA	NA	NFY_Q6	241	0.405992	1.15516	0.035	0.478925	67
CCOC	MAGMA	ENSG00000135457	CP2	CP2_01	250	0.405458	1.15034	0.035	0.486106	72
NMOC	MAGMA	ENSG00000117505	DR1	DR1_Q3	245	0.446497	1.16373	0.035	0.375334	82
MOC	chromMAGMA	ENSG00000082175	PGR	PR_02	125	0.333928	1.26607	0.035	0.179176	90
CCOC	MAGMA	NA	NA	NFKAPPAB_01	244	0.403096	1.14047	0.035	0.516519	81
NMOC	chromMAGMA	NA	NA	AACWWCAANK_UNKNOWN	136	0.358054	1.25558	0.035	0.186913	107
EnOC	chromMAGMA	ENSG00000123268	ATF1	ATF1_Q6	219	0.306055	1.23695	0.035	0.20142	120
CCOC	chromMAGMA	NA	NA	GCM_Q2	226	0.302149	1.22139	0.035	0.205461	145
MOC	MAGMA	ENSG00000176678	FREAC7	FREAC7_01	187	0.421797	1.16828	0.035	0.527616	49
CCOC	chromMAGMA	ENSG00000124782	RREB1	RREB1_01	197	0.302335	1.21082	0.035	0.217891	157
CCOC	chromMAGMA	ENSG00000122034	AP2	AP2_Q6	246	0.296656	1.19981	0.035	0.231842	170
EnOC	chromMAGMA	ENSG00000108091	TST1	TST1_01	229	0.298678	1.20853	0.035	0.238864	147
MOC	MAGMA	ENSG00000125798	HNF3B	HNF3B_01	206	0.415665	1.15579	0.035	0.554074	58
MOC	chromMAGMA	NA	NA	TTCYNRGAA_STAT5B_01	310	0.296419	1.18729	0.035	0.24626	185
MOC	chromMAGMA	ENSG00000100811	YY1	YY1_02	236	0.304978	1.20371	0.035	0.246654	149
HGSOC	MAGMA	ENSG00000071564	E47	E47_02	239	0.444298	1.16423	0.027	0.384563	87
MOC	chromMAGMA	ENSG00000185630	PBX1	PBX1_01	233	0.303464	1.19659	0.035	0.251777	160
HGSOC	chromMAGMA	ENSG00000118260	CREB	CREB_Q3	234	0.349448	1.26016	0.023	0.232137	88
HGSOC	MAGMA	NA	NA	WCAANNNYCAG_UNKNOWN	240	0.441778	1.16407	0.028	0.381194	88
HGSOC	chromMAGMA	ENSG00000120738	EGR1	EGR1_01	256	0.346919	1.25989	0.015	0.230428	89
CCOC	chromMAGMA	NA	NA	GCGSCMNTTT_UNKNOWN	68	0.363377	1.33764	0.035035	0.106527	59
NMOC	chromMAGMA	ENSG00000186951	PPARA	PPARA_01	33	0.467456	1.44537	0.0352467	0.176256	11
NMOC	MAGMA	NA	NA	GTCNYYATGR_UNKNOWN	108	0.484699	1.23549	0.036	0.315303	30
EnOC	MAGMA	ENSG00000105516	DBP	DBP_Q6	248	0.404565	1.13934	0.036	0.485257	85
CCOC	MAGMA	ENSG00000112592	TBP	TBP_01	232	0.403449	1.14276	0.036	0.515343	78
HGSOC	MAGMA	NA	NA	CMYB_01	244	0.443182	1.16377	0.039	0.378641	89
MOC	chromMAGMA	ENSG00000245848	CEBP	CEBP_C	188	0.31481	1.2243	0.036	0.215982	130
MOC	chromMAGMA	NA	NA	CEBPDELTA_Q6	217	0.310926	1.22239	0.036	0.216232	133
HGSOC	chromMAGMA	ENSG00000185811	LYF1	LYF1_01	247	0.348771	1.25883	0.018	0.231058	90
LGSOC	chromMAGMA	NA	NA	TGASTMAGC_NFE2_01	182	0.318589	1.23664	0.036	0.219507	109
MOC	chromMAGMA	ENSG00000057252	STAT	STAT_01	239	0.306983	1.21029	0.036	0.237205	142
MOC	chromMAGMA	ENSG00000106459	NRF1	NRF1_Q6	248	0.301849	1.19071	0.036	0.242019	180
NMOC	chromMAGMA	ENSG00000132005	EFC	EFC_Q6	245	0.334428	1.20165	0.036	0.24179	165
MOC	chromMAGMA	NA	NA	HAND1E47_01	250	0.30404	1.19658	0.036	0.250244	161
HGSOC	MAGMA	ENSG00000115415	STAT1	STAT1_02	247	0.440427	1.15978	0.041	0.400027	90
MOC	chromMAGMA	NA	NA	COUP_01	240	0.303804	1.19824	0.036	0.252867	156
HGSOC	chromMAGMA	ENSG00000137309	HMGIY	HMGIY_Q6	231	0.347741	1.25854	0.02	0.22942	91
MOC	chromMAGMA	ENSG00000118260	CREB	CREB_Q3	234	0.30445	1.19843	0.036	0.253932	155
HGSOC	MAGMA	ENSG00000126746	CIZ	CIZ_01	231	0.443717	1.15941	0.041	0.398049	91
HGSOC	chromMAGMA	ENSG00000138795	LEF1	LEF1_Q6	242	0.347363	1.25824	0.02	0.227938	92
NMOC	chromMAGMA	NA	NA	WGTTNNNNNAAA_UNKNOWN	494	0.313737	1.15786	0.036	0.284914	238
MOC	MAGMA	NA	NA	MMEF2_Q6	256	0.412339	1.15003	0.036	0.537741	66
LGSOC	chromMAGMA	ENSG00000012504	FXR	FXR_IR1_Q6	99	0.345337	1.30751	0.037	0.18601	49
LGSOC	chromMAGMA	NA	NA	CDPCR1_01	115	0.337272	1.27309	0.037	0.224335	65
EnOC	chromMAGMA	ENSG00000158022	IRF	IRF_Q6	228	0.299844	1.2127	0.037	0.234542	142
EnOC	MAGMA	ENSG00000138795	LEF1	LEF1_Q6	255	0.404361	1.14443	0.037	0.489328	77
LGSOC	chromMAGMA	ENSG00000118260	CREB	CREB_Q4	255	0.302752	1.19987	0.037	0.272375	142
EnOC	MAGMA	ENSG00000106331	PAX4	PAX4_02	228	0.409532	1.15118	0.037	0.504552	66
EnOC	MAGMA	NA	NA	SMTTTTGT_UNKNOWN	387	0.39167	1.11783	0.037	0.551577	109
NMOC	MAGMA	NA	NA	HOX13_01	43	0.546551	1.32126	0.038	0.376756	7
EnOC	chromMAGMA	NA	NA	GGCNNMSMYNTTG_UNKNOWN	71	0.360574	1.33338	0.038	0.133059	49
NMOC	MAGMA	NA	NA	CDPCR3HD_01	227	0.447619	1.16915	0.038	0.384112	73
HGSOC	MAGMA	NA	NA	YTCCCRNNAGGY_UNKNOWN	67	0.460903	1.15935	0.145	0.394038	92
CCOC	chromMAGMA	ENSG00000173757	STAT5B	STAT5B_01	228	0.299396	1.20879	0.038	0.216778	162
EnOC	MAGMA	ENSG00000102145	GATA1	GATA1_04	238	0.406737	1.14606	0.038	0.508167	72
LGSOC	chromMAGMA	ENSG00000215788	TNFRSF25	DR3_Q4	136	0.332358	1.26814	0.038	0.22647	69
EnOC	MAGMA	ENSG00000171786	HEN1	HEN1_01	194	0.414967	1.1649	0.038	0.490571	53
HGSOC	chromMAGMA	ENSG00000143190	POU2F1	OCT1_Q5_01	232	0.343819	1.25285	0.02	0.241193	93
EnOC	chromMAGMA	ENSG00000144852	PXR	PXR_Q2	245	0.298743	1.21256	0.038	0.233356	143
MOC	MAGMA	ENSG00000135100	HNF1	HNF1_01	235	0.413698	1.15387	0.038	0.544205	61
MOC	chromMAGMA	ENSG00000125952	MAX	MAX_01	249	0.304518	1.20315	0.038	0.246927	150
NMOC	chromMAGMA	NA	NA	TATA_C	249	0.332952	1.2043	0.038	0.238097	162
HGSOC	MAGMA	NA	NA	TFIII_Q6	201	0.444075	1.15914	0.051	0.391059	93
LGSOC	chromMAGMA	ENSG00000136352	TITF1	TITF1_Q3	224	0.310274	1.21411	0.038	0.257875	125
LGSOC	chromMAGMA	NA	NA	YGCGYRCGC_UNKNOWN	302	0.303089	1.20511	0.038	0.26448	137
LGSOC	chromMAGMA	NA	NA	YATGNWAAT_OCT_C	315	0.293296	1.16873	0.038	0.316241	181
HGSOC	chromMAGMA	ENSG00000179388	EGR3	EGR3_01	79	0.370469	1.24868	0.084	0.251538	94
EnOC	MAGMA	ENSG00000196628	TCF4	TCF4_Q5	228	0.407345	1.14479	0.038	0.492516	76
MOC	MAGMA	NA	NA	MYOGNF1_01	46	0.505258	1.29844	0.038	0.485755	6
MOC	MAGMA	NA	NA	RAAGNYNNCTTY_UNKNOWN	139	0.430893	1.17822	0.038	0.511078	42
LGSOC	chromMAGMA	NA	NA	CRGAARNNNNCGA_UNKNOWN	46	0.40922	1.3808	0.039	0.175406	20
NMOC	MAGMA	ENSG00000118260	CREB	CREB_Q3	239	0.446181	1.16264	0.039	0.368841	85
HGSOC	MAGMA	NA	NA	GATGKMRGCG_UNKNOWN	64	0.462019	1.15884	0.15	0.388548	94
EnOC	chromMAGMA	ENSG00000118260	CREB	CREB_01	252	0.298054	1.21076	0.039	0.234017	146
MOC	chromMAGMA	NA	NA	GTGGGTGK_UNKNOWN	273	0.298849	1.19158	0.039	0.244807	176
HGSOC	chromMAGMA	ENSG00000143437	ARNT	ARNT_01	253	0.342839	1.24808	0.019	0.250954	95
HGSOC	MAGMA	NA	NA	HP1SITEFACTOR_Q6	222	0.443322	1.15859	0.042	0.385985	95
MOC	MAGMA	NA	NA	TAXCREB_01	133	0.428083	1.17546	0.039	0.500811	45
HGSOC	MAGMA	ENSG00000117505	DR1	DR1_Q3	245	0.439527	1.15853	0.034	0.382256	96
CCOC	chromMAGMA	ENSG00000072310	SREBP1	SREBP1_02	82	0.350392	1.32306	0.04	0.115463	66
EnOC	chromMAGMA	NA	NA	GGGNRMNNYCAT_UNKNOWN	76	0.350963	1.31123	0.04	0.146437	60
HGSOC	chromMAGMA	NA	NA	RYTGCNNRGNAAC_MIF1_01	80	0.363145	1.24787	0.077	0.249038	96
CCOC	chromMAGMA	ENSG00000074219	ETF	ETF_Q6	110	0.32499	1.26445	0.04	0.154773	109
NMOC	MAGMA	ENSG00000043355	ZIC2	ZIC2_01	245	0.442467	1.15281	0.04	0.393257	94
NMOC	chromMAGMA	ENSG00000051108	MIF1	MIF1_01	169	0.348893	1.2341	0.04	0.206551	128
NMOC	chromMAGMA	NA	NA	TFIII_Q6	193	0.343499	1.22247	0.04	0.214709	143
MOC	chromMAGMA	ENSG00000101412	E2F1	E2F1_Q4	231	0.307836	1.21317	0.04	0.231661	140
MOC	chromMAGMA	ENSG00000177606	AP1	AP1_Q6	244	0.301711	1.19442	0.04	0.245419	169
NMOC	chromMAGMA	ENSG00000148516	AREB6	AREB6_03	244	0.337912	1.20762	0.04	0.231088	160
EnOC	chromMAGMA	ENSG00000100811	YY1	YY1_02	236	0.297629	1.20206	0.04	0.248245	154
MOC	chromMAGMA	NA	NA	NFKAPPAB65_01	229	0.304714	1.20072	0.04	0.251498	152
EnOC	chromMAGMA	NA	NA	RGAANNTTC_HSF1_01	416	0.278355	1.15668	0.04	0.309803	217
MOC	MAGMA	ENSG00000068305	RSRFC4	RSRFC4_Q2	206	0.416507	1.15575	0.04	0.544971	59
LGSOC	MAGMA	NA	NA	NERF_Q2	238	0.414469	1.1381	0.04	0.814746	53
HGSOC	chromMAGMA	NA	NA	ACTAYRNNNCCCR_UNKNOWN	427	0.337567	1.24767	0.002	0.247183	97
NMOC	chromMAGMA	ENSG00000085276	MECOM	EVI1_03	56	0.408051	1.34467	0.041	0.152462	43
HGSOC	MAGMA	ENSG00000112658	SRF	SRF_C	206	0.438979	1.15816	0.05	0.380439	97
HGSOC	chromMAGMA	ENSG00000148516	AREB6	AREB6_01	253	0.343908	1.24663	0.019	0.247662	98
NMOC	MAGMA	NA	NA	CMYB_01	244	0.442045	1.15296	0.041	0.396507	93
LGSOC	MAGMA	ENSG00000102145	GATA1	GATA1_01	230	0.420079	1.14773	0.041	0.914683	40
MOC	chromMAGMA	NA	NA	TGANNYRGCA_TCF11MAFG_01	281	0.298961	1.18761	0.041	0.24661	184
NMOC	chromMAGMA	ENSG00000122861	ATF	ATF_01	241	0.333473	1.20159	0.041	0.24052	166
NMOC	chromMAGMA	NA	NA	YGCGYRCGC_UNKNOWN	302	0.329919	1.19887	0.041	0.243065	170
EnOC	MAGMA	ENSG00000178573	MAF	MAF_Q6	257	0.406955	1.14948	0.041	0.490452	70
HGSOC	MAGMA	ENSG00000118513	MYB	MYB_Q3	240	0.442104	1.15759	0.041	0.380272	98
HGSOC	MAGMA	ENSG00000162676	GFI1	GFI1_01	251	0.440084	1.15734	0.031	0.378168	99
MOC	MAGMA	NA	NA	GTTNYYNNGGTNA_UNKNOWN	85	0.452526	1.21881	0.041	0.580561	18
EnOC	MAGMA	NA	NA	STTTCRNTTT_IRF_Q6	184	0.414902	1.15813	0.041	0.506446	58
EnOC	chromMAGMA	NA	NA	MYOGNF1_01	42	0.401356	1.38741	0.041041	0.11621	28
NMOC	MAGMA	ENSG00000257923	CDP	CDP_02	106	0.488032	1.23001	0.042	0.293348	35
NMOC	chromMAGMA	NA	NA	ACTWSNACTNY_UNKNOWN	100	0.372611	1.29484	0.042	0.167656	72
HGSOC	chromMAGMA	NA	NA	GCGSCMNTTT_UNKNOWN	68	0.372048	1.24424	0.105	0.253275	99
NMOC	chromMAGMA	ENSG00000122861	ATF	ATF_B	179	0.347434	1.23582	0.042	0.205184	126
MOC	chromMAGMA	ENSG00000162676	GFI1	GFI1_01	244	0.306877	1.21136	0.042	0.235714	141
NMOC	chromMAGMA	NA	NA	TCF1P_Q6	249	0.338627	1.21419	0.042	0.226045	151
MOC	chromMAGMA	ENSG00000108924	HLF	HLF_01	236	0.303516	1.20665	0.042	0.242227	146
EnOC	MAGMA	ENSG00000140968	ICSBP	ICSBP_Q6	244	0.403277	1.14041	0.042	0.487779	83
HGSOC	chromMAGMA	ENSG00000108091	TST1	TST1_01	229	0.343162	1.24398	0.035	0.251572	100
NMOC	chromMAGMA	ENSG00000173757	STAT5B	STAT5B_01	228	0.332641	1.19266	0.042	0.247414	180
NMOC	chromMAGMA	NA	NA	MYCMAX_02	250	0.33188	1.19059	0.042	0.248049	184
LGSOC	chromMAGMA	ENSG00000144852	PXR	PXR_Q2	245	0.30588	1.20458	0.042	0.264608	138
HGSOC	MAGMA	ENSG00000138107	ACTR1A	ARP1_01	156	0.444589	1.15667	0.084	0.378657	100
LGSOC	MAGMA	ENSG00000185630	PBX1	PBX1_01	249	0.4149	1.13943	0.042	0.82779	51
HGSOC	chromMAGMA	ENSG00000076356	OCT	OCT_C	217	0.343713	1.24373	0.033	0.249943	101
MOC	chromMAGMA	ENSG00000106546	AHR	AHR_01	53	0.387807	1.36323	0.042042	0.136524	32
NMOC	chromMAGMA	NA	NA	RACTNNRTTTNC_UNKNOWN	113	0.371235	1.29109	0.043	0.169167	75
NMOC	MAGMA	ENSG00000171634	FAC1	FAC1_01	208	0.44618	1.16333	0.043	0.373318	83
EnOC	MAGMA	ENSG00000091831	ESR1	ER_Q6_01	262	0.403725	1.1372	0.043	0.487148	88
CCOC	chromMAGMA	NA	NA	HNF4ALPHA_Q6	241	0.300121	1.21296	0.043	0.218895	152
HGSOC	MAGMA	ENSG00000118922	AP2REP	AP2REP_01	174	0.44285	1.15517	0.061	0.38388	101
EnOC	chromMAGMA	ENSG00000158773	USF	USF_01	245	0.293524	1.19571	0.043	0.25138	165
HGSOC	chromMAGMA	ENSG00000107485	GATA3	GATA3_01	226	0.343036	1.24364	0.022	0.247817	102
HGSOC	MAGMA	ENSG00000171634	FAC1	FAC1_01	208	0.439158	1.15329	0.054	0.391148	102
LGSOC	chromMAGMA	ENSG00000101412	E2F1	E2F1_Q4	231	0.305292	1.20594	0.043	0.26371	136
LGSOC	chromMAGMA	ENSG00000115415	STAT1	STAT1_02	242	0.30401	1.20018	0.043	0.273214	141
HGSOC	chromMAGMA	ENSG00000118922	AP2REP	AP2REP_01	166	0.351143	1.24353	0.038	0.245663	103
NMOC	chromMAGMA	NA	NA	RGAGGAARY_PU1_Q6	481	0.312678	1.15481	0.043	0.289163	243
EnOC	MAGMA	ENSG00000175832	PEA3	PEA3_Q6	249	0.401165	1.13383	0.043	0.499841	91
EnOC	MAGMA	NA	NA	RRAGTTGT_UNKNOWN	243	0.403768	1.13994	0.043	0.485866	84
LGSOC	MAGMA	NA	NA	SRY_02	247	0.415426	1.14105	0.043	0.855065	48
NMOC	chromMAGMA	NA	NA	CCAWNWWNNNGGC_UNKNOWN	79	0.390114	1.31267	0.044	0.156181	62
NMOC	chromMAGMA	NA	NA	MEIS1AHOXA9_01	107	0.368923	1.28392	0.044	0.169745	82
LGSOC	chromMAGMA	NA	NA	GNCF_01	67	0.369105	1.31747	0.044	0.176797	45
HGSOC	MAGMA	ENSG00000135100	HNF1	HNF1_C	239	0.438295	1.15252	0.043	0.392069	103
CCOC	chromMAGMA	ENSG00000113580	GR	GR_01	184	0.3024	1.21455	0.044	0.215826	151
NMOC	chromMAGMA	ENSG00000185122	HSF1	HSF1_01	247	0.335035	1.21105	0.044	0.228783	155
NMOC	chromMAGMA	ENSG00000132005	RFX1	RFX1_01	234	0.334031	1.20884	0.044	0.230404	158
MOC	chromMAGMA	ENSG00000115415	STAT1	STAT1_02	242	0.302053	1.19423	0.044	0.24461	170
EnOC	chromMAGMA	ENSG00000100811	YY1	YY1_01	231	0.294755	1.20145	0.044	0.248458	155
NMOC	chromMAGMA	ENSG00000115966	CREBP1	CREBP1_Q2	241	0.332517	1.19764	0.044	0.245242	171
HGSOC	MAGMA	ENSG00000175197	CHOP	CHOP_01	222	0.439017	1.15157	0.041	0.394205	104
HGSOC	chromMAGMA	ENSG00000007372	PAX6	PAX6_01	89	0.364405	1.24344	0.08	0.243522	104
LGSOC	chromMAGMA	NA	NA	RORA1_01	229	0.302281	1.1916	0.044	0.283289	152
HGSOC	chromMAGMA	ENSG00000143437	ARNT	ARNT_02	236	0.342519	1.24252	0.017	0.244033	105
HGSOC	MAGMA	ENSG00000167967	E4F1	E4F1_Q6	275	0.435036	1.15155	0.038	0.390593	105
MOC	MAGMA	NA	NA	WGGAATGY_TEF1_Q6	356	0.394904	1.11257	0.044	0.665882	101
NMOC	chromMAGMA	ENSG00000106546	AHR	AHR_01	53	0.420884	1.36748	0.044044	0.154222	32
LGSOC	MAGMA	ENSG00000148516	AREB6	AREB6_02	246	0.413178	1.13195	0.045	0.815396	59
NMOC	MAGMA	ENSG00000101076	HNF4	HNF4_01_B	242	0.434811	1.14529	0.045	0.411693	102
MOC	chromMAGMA	ENSG00000125347	IRF1	IRF1_01	232	0.303298	1.19579	0.045	0.246774	165
EnOC	chromMAGMA	ENSG00000159216	AML1	AML1_01	250	0.292419	1.19544	0.045	0.250788	166
HGSOC	chromMAGMA	NA	NA	YYCATTCAWW_UNKNOWN	178	0.348878	1.24067	0.036	0.247413	106
LGSOC	chromMAGMA	ENSG00000185630	PBX1	PBX1_01	233	0.30448	1.19702	0.045	0.278799	144
HGSOC	MAGMA	ENSG00000169083	AR	AR_Q2	121	0.446004	1.15149	0.098	0.38721	106
CCOC	MAGMA	NA	NA	ARGGGTTAA_UNKNOWN	115	0.43301	1.19834	0.046	0.418693	35
CCOC	MAGMA	ENSG00000085276	MECOM	EVI1_03	58	0.477021	1.26072	0.046	0.458922	11
CCOC	MAGMA	ENSG00000157557	ETS2	ETS2_B	271	0.397484	1.12935	0.046	0.54048	94
EnOC	chromMAGMA	ENSG00000231924	SP1	SP1_01	227	0.298461	1.2062	0.046	0.241351	150
NMOC	chromMAGMA	ENSG00000118260	CREB	CREB_Q4_01	201	0.339889	1.21157	0.046	0.228963	154
MOC	chromMAGMA	ENSG00000118260	CREB	CREB_Q4	255	0.300473	1.19089	0.046	0.242813	179
NMOC	chromMAGMA	ENSG00000085276	MECOM	EVI1_04	201	0.339052	1.20877	0.046	0.229225	159
LGSOC	chromMAGMA	ENSG00000085276	MECOM	EVI1_04	201	0.307726	1.2112	0.046	0.257393	130
LGSOC	chromMAGMA	ENSG00000141448	GATA6	GATA6_01	237	0.304928	1.19653	0.046	0.278574	145
LGSOC	chromMAGMA	ENSG00000122034	AP2	AP2_Q6	246	0.303821	1.19221	0.046	0.284824	150
HGSOC	chromMAGMA	ENSG00000122034	AP2	AP2_Q6	246	0.341153	1.24035	0.018	0.246101	107
LGSOC	chromMAGMA	NA	NA	WTTGKCTG_UNKNOWN	471	0.283488	1.14798	0.046	0.340719	216
EnOC	MAGMA	NA	NA	RGAGGAARY_PU1_Q6	488	0.385049	1.10537	0.046	0.602449	123
HGSOC	MAGMA	NA	NA	GGAANCGGAANY_UNKNOWN	105	0.45073	1.14989	0.122	0.393285	107
HGSOC	chromMAGMA	NA	NA	GGGNNTTTCC_NFKB_Q6_01	126	0.351792	1.23883	0.065	0.248658	108
EnOC	chromMAGMA	NA	NA	YWATTWNNRGCT_UNKNOWN	66	0.355524	1.32415	0.047	0.133517	55
CCOC	chromMAGMA	NA	NA	ACTWSNACTNY_UNKNOWN	100	0.333081	1.27521	0.047	0.152206	96
CCOC	MAGMA	ENSG00000071564	E47	E47_02	239	0.400382	1.13803	0.047	0.514195	85
NMOC	chromMAGMA	NA	NA	CCCNNNNNNAAGWT_UNKNOWN	98	0.378985	1.28658	0.047	0.167986	80
NMOC	MAGMA	ENSG00000143190	POU2F1	OCT1_05	234	0.438604	1.14653	0.047	0.411056	100
CCOC	chromMAGMA	ENSG00000122877	EGR2	EGR2_01	184	0.304971	1.22441	0.047	0.200015	143
LGSOC	MAGMA	ENSG00000179348	GATA2	GATA2_01	104	0.449068	1.196	0.047	0.812664	19
CCOC	chromMAGMA	ENSG00000111012	VDR	VDR_Q3	214	0.300747	1.20326	0.047	0.224352	168
CCOC	chromMAGMA	NA	NA	CREL_01	243	0.295744	1.19661	0.047	0.239071	172
CCOC	chromMAGMA	ENSG00000113580	GR	GR_Q6_01	246	0.293331	1.18774	0.047	0.247435	186
MOC	chromMAGMA	ENSG00000111012	VDR	VDR_Q3	214	0.305533	1.19631	0.047	0.248001	163
EnOC	chromMAGMA	ENSG00000136352	TITF1	TITF1_Q3	224	0.295833	1.19484	0.047	0.249804	168
NMOC	chromMAGMA	ENSG00000143190	POU2F1	OCT1_06	224	0.33028	1.1914	0.047	0.248367	182
LGSOC	chromMAGMA	ENSG00000118260	CREB	CREB_Q3	234	0.301312	1.1922	0.047	0.282958	151
HGSOC	MAGMA	NA	NA	GGGNNTTTCC_NFKB_Q6_01	131	0.442594	1.14934	0.111	0.393264	108
MOC	MAGMA	ENSG00000100811	YY1	YY1_Q6	234	0.410818	1.15059	0.047	0.548763	64
MOC	MAGMA	NA	NA	MYCMAX_01	245	0.405159	1.13372	0.047	0.583842	81
CCOC	MAGMA	NA	NA	RYCACNNRNNRNCAG_UNKNOWN	70	0.4587	1.23117	0.048	0.390991	21
NMOC	chromMAGMA	NA	NA	GKCGCNNNNNNNTGAYG_UNKNOWN	54	0.412268	1.35122	0.048	0.150365	40
HGSOC	MAGMA	ENSG00000245848	CEBP	CEBP_Q2_01	261	0.435156	1.14917	0.04	0.390914	109
MOC	MAGMA	ENSG00000172216	CEBPB	CEBPB_01	256	0.406962	1.14023	0.048	0.548145	77
EnOC	MAGMA	ENSG00000118260	CREB	CREB_Q3	239	0.401252	1.139	0.048	0.47701	87
CCOC	MAGMA	ENSG00000163132	MSX1	MSX1_01	170	0.412906	1.15549	0.048	0.490491	65
CCOC	MAGMA	ENSG00000112658	SRF	SRF_C	206	0.405552	1.14467	0.048	0.504902	77
MOC	chromMAGMA	NA	NA	CDPCR1_01	115	0.332879	1.25913	0.048	0.18049	98
NMOC	MAGMA	NA	NA	ALPHACP1_01	247	0.441168	1.14567	0.048	0.413165	101
LGSOC	chromMAGMA	NA	NA	WCTCNATGGY_UNKNOWN	75	0.355144	1.30283	0.048	0.194518	50
CCOC	chromMAGMA	NA	NA	STTTCRNTTT_IRF_Q6	178	0.308582	1.22744	0.048	0.194981	141
NMOC	MAGMA	ENSG00000172216	CEBPB	CEBPB_02	256	0.436383	1.13966	0.048	0.437468	105
EnOC	chromMAGMA	ENSG00000082175	PGR	PR_01	137	0.314562	1.23956	0.048	0.199632	117
CCOC	chromMAGMA	ENSG00000196712	NF1	NF1_Q6_01	245	0.295287	1.19835	0.048	0.235031	171
MOC	chromMAGMA	ENSG00000043355	ZIC2	ZIC2_01	234	0.303827	1.19477	0.048	0.245834	168
MOC	chromMAGMA	ENSG00000101076	HNF4	HNF4_01_B	235	0.301923	1.1925	0.048	0.245998	173
NMOC	chromMAGMA	ENSG00000076356	OCT	OCT_Q6	227	0.335433	1.20614	0.048	0.23399	161
EnOC	chromMAGMA	NA	NA	E2F_Q4_01	220	0.296988	1.20098	0.048	0.248392	156
EnOC	chromMAGMA	ENSG00000177426	TGIF	TGIF_01	228	0.295512	1.19597	0.048	0.251949	164
NMOC	chromMAGMA	ENSG00000142937	RPS8	S8_01	219	0.334877	1.19305	0.048	0.249064	178
LGSOC	chromMAGMA	ENSG00000091831	ESR1	ER_Q6_01	252	0.304636	1.20337	0.048	0.266498	139
EnOC	MAGMA	ENSG00000143995	MEIS1	MEIS1_01	236	0.401457	1.13479	0.048	0.497015	90
LGSOC	chromMAGMA	ENSG00000186951	PPAR	PPAR_DR1_Q2	241	0.303337	1.19095	0.048	0.281754	154
HGSOC	chromMAGMA	NA	NA	RRCCGTTA_UNKNOWN	82	0.365694	1.2371	0.11	0.251984	109
EnOC	MAGMA	NA	NA	RGTTAMWNATT_HNF1_01	70	0.465031	1.23303	0.048	0.538943	14
EnOC	chromMAGMA	NA	NA	CDPCR3_01	50	0.380039	1.34492	0.049	0.124674	45
LGSOC	chromMAGMA	NA	NA	GATGKMRGCG_UNKNOWN	64	0.369869	1.32926	0.049	0.161503	42
CCOC	MAGMA	NA	NA	NFKAPPAB65_01	236	0.402763	1.14176	0.049	0.51791	79
EnOC	MAGMA	ENSG00000141448	GATA6	GATA6_01	250	0.403126	1.13629	0.049	0.489271	89
CCOC	chromMAGMA	ENSG00000162772	ATF3	ATF3_Q6	231	0.297547	1.19429	0.049	0.239107	177
MOC	chromMAGMA	ENSG00000154727	NRF2	NRF2_Q4	237	0.306221	1.20827	0.049	0.24034	144
MOC	chromMAGMA	ENSG00000134323	NMYC	NMYC_01	262	0.297414	1.18303	0.049	0.25143	191
MOC	chromMAGMA	ENSG00000089558	ELK1	ELK1_02	243	0.304502	1.19962	0.049	0.253687	153
EnOC	chromMAGMA	ENSG00000054598	FREAC3	FREAC3_01	226	0.294182	1.19176	0.049	0.258178	169
EnOC	chromMAGMA	NA	NA	PAX_Q6	231	0.29173	1.19028	0.049	0.258695	172
NMOC	chromMAGMA	ENSG00000101076	HNF4	HNF4_01	243	0.328015	1.18534	0.049	0.259034	188
HGSOC	MAGMA	ENSG00000111012	VDR	VDR_Q3	222	0.438138	1.14915	0.051	0.387423	110
LGSOC	MAGMA	ENSG00000108091	TST1	TST1_01	242	0.414244	1.13492	0.049	0.802158	57
MOC	MAGMA	NA	NA	NFAT_Q4_01	256	0.405889	1.13363	0.049	0.577661	82
LGSOC	MAGMA	NA	NA	RORA1_01	236	0.417946	1.14534	0.049	0.885898	43
EnOC	MAGMA	NA	NA	WCAANNNYCAG_UNKNOWN	240	0.404627	1.14143	0.049	0.485409	82
EnOC	MAGMA	ENSG00000122861	ATF	ATF_B	185	0.40828	1.14251	0.05	0.48224	81
EnOC	chromMAGMA	ENSG00000184486	POU3F2	POU3F2_01	89	0.336666	1.27392	0.05	0.173449	84
CCOC	MAGMA	NA	NA	HAND1E47_01	268	0.394954	1.12343	0.05	0.52017	108
MOC	chromMAGMA	NA	NA	AAGWWRNYGGC_UNKNOWN	114	0.329447	1.24982	0.05	0.195059	103
CCOC	MAGMA	NA	NA	CREL_01	251	0.396028	1.12916	0.05	0.536865	95
NMOC	MAGMA	ENSG00000106331	PAX4	PAX4_01	257	0.437223	1.13961	0.05	0.433624	106
CCOC	MAGMA	NA	NA	AP1FJ_Q2	260	0.395269	1.12958	0.05	0.543818	93
CCOC	chromMAGMA	NA	NA	NFKB_Q6_01	224	0.297103	1.19605	0.05	0.239306	173
CCOC	chromMAGMA	ENSG00000169083	AR	AR_Q6	234	0.295714	1.1918	0.05	0.240145	182
NMOC	chromMAGMA	ENSG00000109101	WHN	WHN_B	238	0.331535	1.19996	0.05	0.242522	168
EnOC	chromMAGMA	NA	NA	GCM_Q2	226	0.294681	1.18441	0.05	0.267657	179
LGSOC	chromMAGMA	ENSG00000184486	POU3F2	POU3F2_02	228	0.302998	1.19068	0.05	0.28084	155
HGSOC	chromMAGMA	NA	NA	RORA2_01	139	0.353998	1.2365	0.062	0.251449	110
HGSOC	chromMAGMA	ENSG00000152977	ZIC1	ZIC1_01	243	0.343212	1.23526	0.018	0.253069	111
HGSOC	MAGMA	ENSG00000143190	POU2F1	OCT1_03	224	0.4369	1.14901	0.047	0.384807	111
EnOC	chromMAGMA	NA	NA	ACAWNRNSRCGG_UNKNOWN	60	0.360848	1.32738	0.05005	0.135755	52
CCOC	chromMAGMA	ENSG00000251493	FREAC4	FREAC4_01	141	0.31785	1.23844	0.051	0.173245	137
NMOC	MAGMA	NA	NA	YYCATTCAWW_UNKNOWN	185	0.446039	1.15352	0.051	0.401264	91
CCOC	chromMAGMA	NA	NA	YTAATTAA_LHX3_01	176	0.305223	1.2118	0.051	0.219334	154
LGSOC	MAGMA	ENSG00000135100	HNF1	HNF1_Q6	244	0.412353	1.12848	0.051	0.797406	64
EnOC	chromMAGMA	ENSG00000101412	E2F1	E2F1_Q6_01	226	0.293953	1.19171	0.051	0.256783	170
EnOC	chromMAGMA	ENSG00000100811	YY1	YY1_Q6	233	0.295659	1.18863	0.051	0.259784	175
LGSOC	chromMAGMA	ENSG00000196712	NF1	NF1_Q6_01	245	0.303756	1.19415	0.051	0.285363	146
HGSOC	chromMAGMA	ENSG00000156925	ZIC3	ZIC3_01	240	0.341388	1.2349	0.029	0.251926	112
HGSOC	MAGMA	NA	NA	KTGGYRSGAA_UNKNOWN	72	0.456752	1.14898	0.162	0.381613	112
MOC	MAGMA	ENSG00000167825	OLF1	OLF1_01	257	0.406861	1.13841	0.051	0.558224	78
HGSOC	MAGMA	NA	NA	YKACATTT_UNKNOWN	274	0.435287	1.14879	0.033	0.379289	113
MOC	chromMAGMA	NA	NA	TCANNTGAY_SREBP1_01	441	0.284125	1.14479	0.051	0.297313	257
CCOC	chromMAGMA	NA	NA	ACTAYRNNNCCCR_UNKNOWN	427	0.276749	1.14646	0.051	0.315687	240
HGSOC	chromMAGMA	ENSG00000143190	POU2F1	OCT1_02	192	0.343972	1.23238	0.036	0.25802	113
HGSOC	chromMAGMA	ENSG00000231924	SP1	SP1_Q6_01	235	0.338794	1.23221	0.023	0.256283	114
EnOC	MAGMA	NA	NA	TGGNNNNNNKCCAR_UNKNOWN	410	0.386053	1.10406	0.051	0.600607	126
CCOC	MAGMA	NA	NA	YWATTWNNRGCT_UNKNOWN	68	0.455427	1.23133	0.052	0.40904	20
CCOC	MAGMA	ENSG00000184481	FOXO4	FOXO4_02	252	0.398405	1.12795	0.052	0.526186	99
MOC	chromMAGMA	NA	NA	AHRARNT_01	131	0.326431	1.23237	0.052	0.205683	123
CCOC	MAGMA	ENSG00000104783	IK1	IK1_01	265	0.398267	1.13231	0.052	0.554799	87
EnOC	chromMAGMA	ENSG00000175832	PEA3	PEA3_Q6	243	0.294919	1.1963	0.052	0.25239	163
NMOC	chromMAGMA	ENSG00000196628	TCF4	TCF4_Q5	211	0.331434	1.19375	0.052	0.251207	175
LGSOC	MAGMA	ENSG00000185811	LYF1	LYF1_01	259	0.411735	1.12787	0.052	0.793894	65
NMOC	chromMAGMA	NA	NA	ALPHACP1_01	240	0.33107	1.19218	0.052	0.247296	181
NMOC	chromMAGMA	ENSG00000057252	STAT	STAT_01	239	0.329279	1.19009	0.052	0.248152	185
NMOC	chromMAGMA	ENSG00000122034	AP2	AP2_Q6_01	254	0.326096	1.17967	0.052	0.258743	202
MOC	chromMAGMA	NA	NA	TGCTGAY_UNKNOWN	478	0.282219	1.14794	0.052	0.292344	252
HGSOC	MAGMA	ENSG00000085276	MECOM	EVI1_04	220	0.439717	1.14871	0.045	0.376506	114
HGSOC	chromMAGMA	ENSG00000109101	WHN	WHN_B	238	0.341088	1.23176	0.031	0.255351	115
HGSOC	MAGMA	ENSG00000115297	NCX	NCX_01	171	0.440789	1.14845	0.087	0.374945	115
EnOC	chromMAGMA	NA	NA	TGAYRTCA_ATF3_Q6	491	0.271096	1.13516	0.052	0.349333	247
EnOC	MAGMA	NA	NA	CEBPDELTA_Q6	231	0.402243	1.13238	0.052	0.502051	93
MOC	MAGMA	NA	NA	RGTTAMWNATT_HNF1_01	70	0.460903	1.22691	0.052	0.649485	14
NMOC	chromMAGMA	NA	NA	CCGNMNNTNACG_UNKNOWN	76	0.394381	1.32649	0.053	0.151399	54
EnOC	chromMAGMA	NA	NA	GTTGNYNNRGNAAC_UNKNOWN	101	0.327535	1.26614	0.053	0.171123	95
NMOC	MAGMA	ENSG00000153560	LBP1	LBP1_Q6	213	0.442776	1.14674	0.053	0.413885	99
MOC	chromMAGMA	ENSG00000168310	IRF2	IRF2_01	118	0.327729	1.24912	0.053	0.194769	104
CCOC	MAGMA	ENSG00000104689	TNFRSF10A	DR4_Q2	253	0.398977	1.13211	0.053	0.550325	88
HGSOC	chromMAGMA	ENSG00000158022	IRF	IRF_Q6	228	0.340581	1.23161	0.028	0.253659	116
LGSOC	chromMAGMA	NA	NA	GGAMTNNNNNTCCY_UNKNOWN	108	0.333277	1.24713	0.053	0.228149	91
MOC	chromMAGMA	NA	NA	GATA_Q6	182	0.308932	1.19595	0.053	0.247725	164
NMOC	chromMAGMA	ENSG00000122034	AP2	AP2_Q3	235	0.333261	1.20145	0.053	0.239517	167
CCOC	chromMAGMA	ENSG00000184481	FOXO4	FOXO4_01	225	0.291835	1.18329	0.053	0.253381	192
EnOC	chromMAGMA	ENSG00000186130	ZID	ZID_01	247	0.291131	1.18992	0.053	0.257079	174
EnOC	chromMAGMA	NA	NA	TCF1P_Q6	249	0.289342	1.18085	0.053	0.272249	184
HGSOC	MAGMA	ENSG00000177426	TGIF	TGIF_01	236	0.438275	1.14833	0.053	0.372523	116
EnOC	MAGMA	NA	NA	ALPHACP1_01	246	0.39781	1.12396	0.053	0.545838	99
HGSOC	MAGMA	ENSG00000185811	LYF1	LYF1_01	259	0.435132	1.14798	0.043	0.371579	117
CCOC	chromMAGMA	ENSG00000179348	GATA2	GATA2_01	101	0.32994	1.25977	0.054	0.157413	114
CCOC	chromMAGMA	NA	NA	GGGNNTTTCC_NFKB_Q6_01	126	0.320864	1.24897	0.054	0.168179	123
CCOC	MAGMA	ENSG00000177606	AP1	AP1_Q2	254	0.396136	1.12785	0.054	0.51642	101
CCOC	MAGMA	ENSG00000172845	SP3	SP3_Q3	235	0.402754	1.13903	0.054	0.517558	83
NMOC	MAGMA	NA	NA	RORA1_01	236	0.436596	1.14159	0.054	0.428433	104
HGSOC	chromMAGMA	NA	NA	LXR_Q3	77	0.362653	1.23038	0.112	0.255338	117
NMOC	chromMAGMA	NA	NA	GGAMTNNNNNTCCY_UNKNOWN	108	0.364995	1.25804	0.054	0.184194	105
CCOC	chromMAGMA	ENSG00000198081	ZF5	ZF5_B	225	0.298813	1.20566	0.054	0.218847	167
LGSOC	chromMAGMA	NA	NA	CATRRAGC_UNKNOWN	121	0.329352	1.25221	0.054	0.220281	88
CCOC	chromMAGMA	ENSG00000100644	HIF1A	HIF1_Q3	220	0.297151	1.19181	0.054	0.241444	181
MOC	chromMAGMA	ENSG00000105698	USF2	USF2_Q6	243	0.302724	1.1909	0.054	0.244127	178
MOC	chromMAGMA	ENSG00000122034	AP2	AP2_Q6_01	254	0.299082	1.18526	0.054	0.247004	189
MOC	chromMAGMA	ENSG00000159216	AML1	AML1_Q6	250	0.298454	1.18541	0.054	0.247866	188
NMOC	chromMAGMA	ENSG00000198081	ZF5	ZF5_01	225	0.332981	1.19625	0.054	0.247963	172
NMOC	chromMAGMA	ENSG00000143437	ARNT	ARNT_02	236	0.330101	1.19321	0.054	0.250059	177
NMOC	chromMAGMA	ENSG00000141510	P53	P53_DECAMER_Q2	235	0.329578	1.1853	0.054	0.257796	189
EnOC	chromMAGMA	ENSG00000159216	AML1	AML1_Q6	250	0.292419	1.18639	0.054	0.262302	178
EnOC	chromMAGMA	ENSG00000214022	AP4	AP4_Q5	242	0.292894	1.18391	0.054	0.267826	180
MOC	MAGMA	ENSG00000068305	MEF2	MEF2_Q6_01	236	0.409959	1.14259	0.054	0.554341	73
HGSOC	MAGMA	ENSG00000184271	POU6F1	POU6F1_01	228	0.437493	1.14653	0.052	0.376965	118
CCOC	chromMAGMA	NA	NA	YNGTTNNNATT_UNKNOWN	340	0.281021	1.15643	0.054	0.302512	223
MOC	chromMAGMA	NA	NA	GKCGCNNNNNNNTGAYG_UNKNOWN	54	0.374111	1.32351	0.055	0.135185	55
CCOC	chromMAGMA	NA	NA	GGCNRNWCTTYS_UNKNOWN	81	0.33964	1.28539	0.055	0.141176	90
NMOC	MAGMA	ENSG00000148516	AREB6	AREB6_02	246	0.435473	1.13497	0.055	0.458766	108
MOC	chromMAGMA	NA	NA	AP2ALPHA_01	226	0.301701	1.19888	0.055	0.254264	154
EnOC	chromMAGMA	ENSG00000143190	POU2F1	OCT1_04	203	0.299316	1.19751	0.055	0.256558	158
LGSOC	chromMAGMA	NA	NA	NFKB_Q6	244	0.30148	1.18695	0.055	0.285484	160
HGSOC	chromMAGMA	NA	NA	AACYNNNNTTCCS_UNKNOWN	93	0.358488	1.22713	0.104	0.263552	118
LGSOC	MAGMA	ENSG00000125482	TTF1	TTF1_Q6	250	0.410292	1.12732	0.055	0.78926	66
MOC	MAGMA	NA	NA	CATTGTYY_SOX9_B1	349	0.392822	1.10753	0.055	0.662174	110
LGSOC	MAGMA	ENSG00000184486	BRN2	BRN2_01	229	0.416708	1.14198	0.056	0.85917	47
HGSOC	MAGMA	ENSG00000118513	MYB	MYB_Q5_01	254	0.43296	1.14474	0.054	0.384917	119
CCOC	chromMAGMA	NA	NA	CCAWNWWNNNGGC_UNKNOWN	79	0.342788	1.26733	0.056	0.153179	106
CCOC	MAGMA	ENSG00000125347	IRF1	IRF1_01	240	0.396437	1.12816	0.056	0.529769	98
NMOC	MAGMA	ENSG00000177426	TGIF	TGIF_01	236	0.437191	1.1418	0.056	0.431204	103
CCOC	chromMAGMA	ENSG00000082175	PGR	PR_01	137	0.311922	1.22251	0.056	0.203697	144
CCOC	chromMAGMA	ENSG00000068305	RSRFC4	RSRFC4_Q2	195	0.298879	1.20004	0.056	0.232363	169
MOC	chromMAGMA	NA	NA	AP3_Q6	225	0.303938	1.18951	0.056	0.244324	181
CCOC	chromMAGMA	ENSG00000137273	FREAC2	FREAC2_01	242	0.292826	1.18439	0.056	0.252378	190
EnOC	chromMAGMA	NA	NA	E2F4DP1_01	222	0.298115	1.19631	0.056	0.253929	162
CCOC	chromMAGMA	ENSG00000112592	TBP	TBP_01	219	0.293243	1.18266	0.056	0.254195	193
NMOC	chromMAGMA	ENSG00000184481	FOXO4	FOXO4_01	225	0.327439	1.18161	0.056	0.258988	197
LGSOC	chromMAGMA	NA	NA	GCM_Q2	226	0.302206	1.18621	0.056	0.284764	162
LGSOC	chromMAGMA	ENSG00000231924	SP1	SP1_Q4_01	243	0.298314	1.17685	0.056	0.307876	168
MOC	MAGMA	ENSG00000125618	PAX8	PAX8_B	96	0.444062	1.19211	0.056	0.538109	31
LGSOC	MAGMA	NA	NA	IK2_01	259	0.411938	1.13048	0.056	0.807961	61
LGSOC	MAGMA	NA	NA	NFMUE1_Q6	235	0.415402	1.14081	0.056	0.841126	49
EnOC	MAGMA	NA	NA	NKX22_01	182	0.408723	1.14636	0.056	0.512353	71
CCOC	chromMAGMA	ENSG00000169083	AR	AR_03	52	0.371638	1.34494	0.057	0.107693	53
CCOC	MAGMA	NA	NA	GKCGCNNNNNNNTGAYG_UNKNOWN	54	0.471935	1.25133	0.057	0.418737	14
NMOC	MAGMA	NA	NA	TGTYNNNNNRGCARM_UNKNOWN	83	0.481567	1.2116	0.057	0.314513	44
EnOC	MAGMA	ENSG00000185122	HSF1	HSF1_01	262	0.397053	1.12441	0.057	0.546988	98
MOC	chromMAGMA	ENSG00000126561	STAT5A	STAT5A_01	236	0.298349	1.18206	0.057	0.253179	192
EnOC	chromMAGMA	ENSG00000177606	AP1	AP1_Q6	244	0.289699	1.17487	0.057	0.279073	193
HGSOC	chromMAGMA	NA	NA	GGCNKCCATNK_UNKNOWN	116	0.351517	1.22689	0.087	0.26212	119
MOC	chromMAGMA	NA	NA	WGGAATGY_TEF1_Q6	346	0.290735	1.16047	0.057	0.283709	224
HGSOC	chromMAGMA	ENSG00000115297	NCX	NCX_01	162	0.345165	1.22653	0.042	0.261177	120
EnOC	MAGMA	ENSG00000166949	SMAD3	SMAD3_Q6	232	0.401975	1.12806	0.057	0.529161	95
EnOC	chromMAGMA	NA	NA	KTGGYRSGAA_UNKNOWN	72	0.348268	1.30392	0.058	0.139197	70
NMOC	chromMAGMA	NA	NA	WCTCNATGGY_UNKNOWN	75	0.390783	1.32246	0.058	0.150083	57
CCOC	chromMAGMA	ENSG00000168610	STAT3	STAT3_02	138	0.313648	1.2278	0.058	0.195497	140
LGSOC	chromMAGMA	NA	NA	GGGNRMNNYCAT_UNKNOWN	76	0.352833	1.28574	0.058	0.206837	59
CCOC	chromMAGMA	ENSG00000158022	IRF	IRF_Q6	228	0.296246	1.19537	0.058	0.238449	175
MOC	chromMAGMA	ENSG00000148516	AREB6	AREB6_04	228	0.301273	1.18854	0.058	0.244994	183
CCOC	chromMAGMA	ENSG00000100393	EP300	P300_01	233	0.292754	1.18334	0.058	0.25454	191
NMOC	chromMAGMA	ENSG00000100811	YY1	YY1_Q6	233	0.332023	1.1914	0.058	0.247016	183
MOC	chromMAGMA	ENSG00000100393	EP300	P300_01	233	0.298199	1.17915	0.058	0.259975	194
HGSOC	MAGMA	ENSG00000245848	CEBP	CEBP_Q3	246	0.434826	1.1442	0.048	0.38496	120
LGSOC	chromMAGMA	ENSG00000105698	USF2	USF2_Q6	243	0.301206	1.18517	0.058	0.284897	164
HGSOC	chromMAGMA	ENSG00000125347	IRF1	IRF1_01	232	0.338571	1.22645	0.027	0.259283	121
HGSOC	MAGMA	NA	NA	NFKAPPAB_01	244	0.433687	1.14346	0.05	0.386209	121
LGSOC	chromMAGMA	ENSG00000132005	EFC	EFC_Q6	245	0.299994	1.18046	0.058	0.29833	166
LGSOC	chromMAGMA	NA	NA	CETS1P54_01	254	0.297281	1.17257	0.058	0.313798	174
LGSOC	chromMAGMA	NA	NA	TGATTTRY_GFI1_01	259	0.29578	1.16938	0.058	0.317321	179
MOC	MAGMA	ENSG00000126561	STAT5A	STAT5A_04	205	0.413064	1.14318	0.058	0.555775	72
EnOC	MAGMA	NA	NA	TNCATNTCCYR_UNKNOWN	127	0.425329	1.17138	0.058	0.480766	48
MOC	chromMAGMA	NA	NA	KRCTCNNNNMANAGC_UNKNOWN	15	0.50108	1.43678	0.0580781	0.0861941	20
CCOC	chromMAGMA	NA	NA	GATGKMRGCG_UNKNOWN	64	0.355869	1.29975	0.059	0.132297	79
CCOC	MAGMA	ENSG00000108091	TST1	TST1_01	242	0.399916	1.12851	0.059	0.537326	96
MOC	chromMAGMA	NA	NA	CCAWYNNGAAR_UNKNOWN	131	0.326055	1.23694	0.059	0.206702	115
CCOC	MAGMA	ENSG00000143995	MEIS1	MEIS1_01	236	0.399619	1.13345	0.059	0.550236	86
LGSOC	chromMAGMA	ENSG00000168610	STAT3	STAT3_02	138	0.323972	1.23911	0.059	0.218518	106
NMOC	chromMAGMA	ENSG00000102145	GATA1	GATA1_02	226	0.330253	1.19362	0.059	0.250115	176
EnOC	chromMAGMA	ENSG00000112658	SRF	SRF_Q4	207	0.294791	1.18764	0.059	0.261247	176
MOC	chromMAGMA	ENSG00000159216	AML1	AML1_01	250	0.298454	1.17404	0.059	0.265331	203
NMOC	chromMAGMA	NA	NA	COREBINDINGFACTOR_Q6	247	0.327615	1.18218	0.059	0.258451	196
LGSOC	MAGMA	ENSG00000112658	SRF	SRF_Q5_01	215	0.412051	1.12923	0.059	0.800188	63
HGSOC	MAGMA	NA	NA	SRY_02	247	0.43725	1.1433	0.053	0.384027	122
LGSOC	MAGMA	NA	NA	GATGKMRGCG_UNKNOWN	64	0.479123	1.23784	0.059	1	5
NMOC	chromMAGMA	NA	NA	CRGAARNNNNCGA_UNKNOWN	46	0.418177	1.33843	0.06	0.146689	48
LGSOC	chromMAGMA	ENSG00000186951	PPARA	PPARA_02	123	0.328987	1.25281	0.06	0.223496	86
MOC	chromMAGMA	ENSG00000177426	TGIF	TGIF_01	228	0.303012	1.19395	0.06	0.243922	171
MOC	MAGMA	ENSG00000107187	LHX3	LHX3_01	221	0.40729	1.13153	0.06	0.5849	84
MOC	chromMAGMA	NA	NA	ISRE_01	232	0.298007	1.17954	0.06	0.260054	193
MOC	chromMAGMA	ENSG00000125347	IRF1	IRF1_Q6	235	0.298673	1.17808	0.06	0.262222	195
CCOC	chromMAGMA	ENSG00000158773	USF	USF_Q6	245	0.288086	1.17326	0.06	0.275509	200
LGSOC	chromMAGMA	ENSG00000133110	POSTN	OSF2_Q6	240	0.301248	1.19322	0.06	0.284786	148
NMOC	chromMAGMA	ENSG00000125952	MAX	MAX_01	249	0.325051	1.17256	0.06	0.265123	215
LGSOC	chromMAGMA	ENSG00000143190	POU2F1	OCT1_05	218	0.298978	1.17692	0.06	0.309456	167
LGSOC	chromMAGMA	NA	NA	CACBINDINGPROTEIN_Q6	236	0.297642	1.17266	0.06	0.317028	172
MOC	MAGMA	ENSG00000143190	POU2F1	OCT1_Q5_01	247	0.406299	1.14083	0.06	0.549791	76
HGSOC	chromMAGMA	NA	NA	HOX13_01	41	0.383366	1.226	0.162162	0.25852	122
NMOC	MAGMA	ENSG00000125618	PAX8	PAX8_B	96	0.474753	1.19706	0.061	0.358672	49
NMOC	MAGMA	ENSG00000231924	SP1	SP1_Q6_01	237	0.434049	1.13685	0.061	0.449294	107
CCOC	chromMAGMA	ENSG00000171786	HEN1	HEN1_01	184	0.30151	1.20588	0.061	0.219527	166
EnOC	chromMAGMA	NA	NA	HFH8_01	188	0.300652	1.20532	0.061	0.241078	152
MOC	chromMAGMA	NA	NA	CACCCBINDINGFACTOR_Q6	254	0.292994	1.15906	0.061	0.285967	226
HGSOC	chromMAGMA	NA	NA	NERF_Q2	234	0.339202	1.22548	0.036	0.257947	123
LGSOC	chromMAGMA	NA	NA	GGCKCATGS_UNKNOWN	66	0.35937	1.28909	0.0610611	0.208751	56
CCOC	MAGMA	NA	NA	AHRARNT_01	138	0.416304	1.15748	0.062	0.479949	64
NMOC	MAGMA	ENSG00000141448	GATA6	GATA6_01	250	0.431269	1.12907	0.062	0.479081	114
CCOC	chromMAGMA	ENSG00000103495	MAZ	MAZ_Q6	178	0.302704	1.20881	0.062	0.218081	161
LGSOC	chromMAGMA	NA	NA	GTCNYYATGR_UNKNOWN	105	0.337203	1.25857	0.062	0.231088	77
NMOC	chromMAGMA	NA	NA	YTAAYNGCT_UNKNOWN	133	0.349579	1.22189	0.062	0.21474	144
HGSOC	MAGMA	ENSG00000231924	SP1	SP1_Q6_01	237	0.435565	1.14326	0.061	0.381117	123
HGSOC	MAGMA	NA	NA	CATTGTYY_SOX9_B1	349	0.429542	1.14252	0.032	0.382487	124
HGSOC	chromMAGMA	NA	NA	RACTNNRTTTNC_UNKNOWN	113	0.353052	1.22472	0.092	0.258239	124
MOC	chromMAGMA	ENSG00000122034	AP2	AP2_Q6	246	0.296931	1.1766	0.062	0.263334	198
NMOC	chromMAGMA	NA	NA	LMO2COM_01	240	0.324647	1.17513	0.062	0.261572	211
LGSOC	MAGMA	ENSG00000099326	MZF1	MZF1_01	230	0.413683	1.13391	0.062	0.802105	58
HGSOC	chromMAGMA	ENSG00000100219	XBP1	XBP1_01	124	0.352188	1.22444	0.077	0.257077	125
LGSOC	MAGMA	NA	NA	GKCGCNNNNNNNTGAYG_UNKNOWN	54	0.482637	1.23503	0.062	1	6
CCOC	MAGMA	ENSG00000113580	GR	GR_Q6_01	256	0.396033	1.12343	0.063	0.515462	109
NMOC	MAGMA	ENSG00000162676	GFI1	GFI1_01	251	0.430886	1.1299	0.063	0.476638	113
MOC	chromMAGMA	NA	NA	CGTSACG_PAX3_B	146	0.317172	1.22382	0.063	0.215584	131
HGSOC	MAGMA	NA	NA	CGTSACG_PAX3_B	146	0.439493	1.14185	0.1	0.38342	125
EnOC	chromMAGMA	NA	NA	CGTSACG_PAX3_B	146	0.309389	1.21753	0.063	0.229953	136
NMOC	chromMAGMA	ENSG00000126561	STAT5A	STAT5A_01	236	0.326718	1.17809	0.063	0.260993	204
NMOC	chromMAGMA	ENSG00000113580	GR	GR_Q6_01	246	0.323907	1.17537	0.063	0.262022	210
NMOC	chromMAGMA	NA	NA	CREBP1CJUN_01	245	0.328168	1.17356	0.063	0.263094	214
HGSOC	MAGMA	NA	NA	NFY_01	239	0.433932	1.14086	0.063	0.386386	126
HGSOC	chromMAGMA	ENSG00000257923	CDP	CDP_01	80	0.357423	1.2243	0.117	0.25541	126
EnOC	MAGMA	NA	NA	WYAAANNRNNNGCG_UNKNOWN	63	0.459592	1.21277	0.063	0.490308	22
NMOC	MAGMA	NA	NA	TAXCREB_02	26	0.568404	1.33939	0.064	0.684078	3
NMOC	MAGMA	NA	NA	GNCF_01	71	0.491432	1.21652	0.064	0.318786	40
NMOC	MAGMA	NA	NA	CCANNAGRKGGC_UNKNOWN	113	0.462427	1.1815	0.064	0.362151	63
EnOC	chromMAGMA	ENSG00000118260	CREB	CREB_Q2_01	212	0.298801	1.20604	0.064	0.240329	151
MOC	chromMAGMA	ENSG00000072310	SREBP1	SREBP1_Q6	235	0.298576	1.17621	0.064	0.262034	200
EnOC	chromMAGMA	NA	NA	E2F_Q3_01	218	0.292018	1.17965	0.064	0.271782	187
EnOC	chromMAGMA	ENSG00000148516	AREB6	AREB6_01	253	0.289053	1.17799	0.064	0.274232	189
CCOC	chromMAGMA	NA	NA	NFKB_Q6	244	0.289115	1.17004	0.064	0.27824	206
EnOC	chromMAGMA	NA	NA	CACBINDINGPROTEIN_Q6	236	0.288844	1.17251	0.064	0.281483	197
LGSOC	chromMAGMA	ENSG00000231924	SP1	SP1_Q6_01	235	0.302599	1.1925	0.064	0.285473	149
HGSOC	chromMAGMA	NA	NA	GTGGGTGK_UNKNOWN	273	0.337758	1.2239	0.023	0.254817	127
LGSOC	chromMAGMA	NA	NA	TAL1BETAITF2_01	236	0.30138	1.1905	0.064	0.279636	156
HGSOC	MAGMA	ENSG00000179388	EGR3	EGR3_01	80	0.453026	1.1405	0.153	0.385399	127
LGSOC	MAGMA	NA	NA	GGGNRMNNYCAT_UNKNOWN	78	0.457381	1.20296	0.064	0.855267	16
EnOC	MAGMA	NA	NA	TTGCWCAAY_CEBPB_02	62	0.461945	1.22062	0.064	0.520142	18
LGSOC	MAGMA	NA	NA	YAATNRNNNYNATT_UNKNOWN	100	0.449252	1.17895	0.064	0.723397	29
LGSOC	MAGMA	ENSG00000169083	AR	AR_Q6	243	0.408975	1.12295	0.065	0.802655	70
CCOC	MAGMA	NA	NA	ETS_Q4	242	0.396895	1.12789	0.065	0.521344	100
CCOC	MAGMA	ENSG00000125347	IRF1	IRF1_Q6	251	0.397126	1.12425	0.065	0.522737	106
EnOC	chromMAGMA	NA	NA	ACTWSNACTNY_UNKNOWN	100	0.323861	1.25023	0.065	0.196194	103
CCOC	MAGMA	ENSG00000164379	HFH1	HFH1_01	236	0.399152	1.13054	0.065	0.546152	91
CCOC	MAGMA	ENSG00000198081	ZF5	ZF5_B	233	0.399318	1.13135	0.065	0.551233	89
HGSOC	MAGMA	ENSG00000115415	STAT1	STAT1_03	240	0.433015	1.14044	0.048	0.382795	128
CCOC	chromMAGMA	ENSG00000118513	MYB	MYB_Q6	226	0.296163	1.19365	0.065	0.238143	179
HGSOC	chromMAGMA	ENSG00000051108	MIF1	MIF1_01	169	0.342024	1.22364	0.062	0.253678	128
NMOC	chromMAGMA	NA	NA	HNF3ALPHA_Q6	192	0.336157	1.19607	0.065	0.246946	173
MOC	chromMAGMA	ENSG00000167967	E4F1	E4F1_Q6	267	0.294705	1.16697	0.065	0.27618	213
MOC	chromMAGMA	ENSG00000198081	ZF5	ZF5_B	225	0.294964	1.16614	0.065	0.277522	214
CCOC	chromMAGMA	NA	NA	CMYB_01	240	0.288347	1.17084	0.065	0.278338	204
NMOC	chromMAGMA	ENSG00000118513	MYB	MYB_Q3	233	0.326167	1.17538	0.065	0.26327	209
HGSOC	MAGMA	NA	NA	RGAGGAARY_PU1_Q6	488	0.425958	1.13871	0.012	0.390132	129
HGSOC	chromMAGMA	ENSG00000101076	HNF4	HNF4_01	243	0.335076	1.22218	0.035	0.256427	129
CCOC	MAGMA	NA	NA	HMEF2_Q6	137	0.417061	1.16216	0.066	0.479138	59
NMOC	MAGMA	ENSG00000215788	TNFRSF25	DR3_Q4	141	0.456436	1.16594	0.066	0.385108	77
EnOC	chromMAGMA	ENSG00000100219	XBP1	XBP1_01	124	0.315533	1.22899	0.066	0.208923	129
LGSOC	chromMAGMA	NA	NA	AACYNNNNTTCCS_UNKNOWN	93	0.335312	1.25489	0.066	0.222515	84
NMOC	chromMAGMA	NA	NA	E2F1DP1RB_01	216	0.331096	1.18497	0.066	0.254738	192
NMOC	chromMAGMA	NA	NA	E2F1DP2_01	220	0.329728	1.18057	0.066	0.258409	200
HGSOC	chromMAGMA	NA	NA	NFAT_Q4_01	244	0.337798	1.22159	0.029	0.256509	130
HGSOC	MAGMA	NA	NA	SRY_01	213	0.432621	1.1386	0.083	0.387792	130
HGSOC	chromMAGMA	ENSG00000043355	ZIC2	ZIC2_01	234	0.336763	1.2215	0.034	0.254727	131
HGSOC	MAGMA	NA	NA	HNF4ALPHA_Q6	255	0.433841	1.13829	0.066	0.386703	131
CCOC	MAGMA	ENSG00000143190	POU2F1	OCT1_Q6	247	0.395498	1.12559	0.067	0.520989	104
EnOC	chromMAGMA	ENSG00000074219	ETF	ETF_Q6	110	0.316845	1.23097	0.067	0.205013	128
NMOC	MAGMA	ENSG00000139515	IPF1	IPF1_Q4	240	0.435065	1.12517	0.067	0.488636	119
HGSOC	chromMAGMA	NA	NA	HP1SITEFACTOR_Q6	217	0.339379	1.2209	0.044	0.254654	132
NMOC	chromMAGMA	NA	NA	RTTTNNNYTGGM_UNKNOWN	145	0.346208	1.21391	0.067	0.22517	152
CCOC	chromMAGMA	ENSG00000143190	POU2F1	OCT1_06	224	0.294507	1.18893	0.067	0.246454	184
CCOC	chromMAGMA	NA	NA	NFY_Q6_01	241	0.291873	1.17804	0.067	0.265318	196
NMOC	chromMAGMA	NA	NA	E2F_02	221	0.330491	1.18152	0.067	0.257947	198
MOC	chromMAGMA	ENSG00000112182	BACH2	BACH2_01	252	0.295086	1.16899	0.067	0.273148	210
NMOC	chromMAGMA	ENSG00000165556	CDX2	CDX2_Q5	232	0.326917	1.17706	0.067	0.261757	206
NMOC	chromMAGMA	ENSG00000105516	DBP	DBP_Q6	234	0.327309	1.17587	0.067	0.263151	208
HGSOC	MAGMA	ENSG00000165556	CDX2	CDX2_Q5	247	0.433087	1.13793	0.056	0.386061	132
LGSOC	chromMAGMA	ENSG00000178573	MAF	MAF_Q6	244	0.293866	1.16315	0.067	0.322815	190
NMOC	chromMAGMA	NA	NA	SMTTTTGT_UNKNOWN	369	0.311431	1.14314	0.067	0.302788	265
LGSOC	MAGMA	ENSG00000100811	YY1	YY1_02	238	0.409871	1.12389	0.067	0.801286	69
NMOC	chromMAGMA	ENSG00000025156	HSF2	HSF2_01	226	0.33056	1.1872	0.068	0.254599	187
HGSOC	chromMAGMA	NA	NA	TCANNTGAY_SREBP1_01	441	0.328865	1.22088	0.012	0.252837	133
MOC	chromMAGMA	ENSG00000158773	USF	USF_C	270	0.294024	1.16075	0.068	0.283964	223
NMOC	chromMAGMA	ENSG00000105392	CRX	CRX_Q4	242	0.323948	1.16967	0.068	0.269431	219
HGSOC	MAGMA	NA	NA	ERR1_Q2	252	0.432553	1.13591	0.059	0.395559	133
HGSOC	chromMAGMA	NA	NA	CDPCR3HD_01	213	0.340131	1.21979	0.043	0.254326	134
EnOC	chromMAGMA	NA	NA	YATGNWAAT_OCT_C	315	0.2828	1.15827	0.068	0.308016	214
CCOC	chromMAGMA	NA	NA	SMTTTTGT_UNKNOWN	369	0.280742	1.15307	0.068	0.309019	227
LGSOC	chromMAGMA	ENSG00000143190	POU2F1	OCT1_01	228	0.296638	1.16642	0.068	0.319737	184
MOC	MAGMA	NA	NA	CREL_01	251	0.401072	1.11911	0.068	0.671576	90
EnOC	MAGMA	NA	NA	HP1SITEFACTOR_Q6	222	0.401164	1.12711	0.068	0.532702	96
NMOC	MAGMA	ENSG00000186951	PPARA	PPARA_02	127	0.457953	1.17297	0.069	0.38142	69
NMOC	chromMAGMA	NA	NA	TTTNNANAGCYR_UNKNOWN	79	0.371947	1.2682	0.069	0.180557	94
HGSOC	MAGMA	ENSG00000169856	HNF6	HNF6_Q6	229	0.43259	1.13561	0.072	0.394242	134
MOC	chromMAGMA	ENSG00000112658	SRF	SRF_Q5_01	205	0.304343	1.18665	0.069	0.245367	187
MOC	chromMAGMA	ENSG00000137309	HMGIY	HMGIY_Q6	231	0.300779	1.17808	0.069	0.260895	196
CCOC	chromMAGMA	ENSG00000118260	CREB	CREB_Q3	234	0.291329	1.17555	0.069	0.270745	198
CCOC	chromMAGMA	ENSG00000128272	ATF4	ATF4_Q2	236	0.289453	1.17129	0.069	0.279601	202
LGSOC	chromMAGMA	ENSG00000136997	MYC	MYC_Q2	179	0.307098	1.19109	0.069	0.283151	153
LGSOC	chromMAGMA	ENSG00000171786	HEN1	HEN1_01	184	0.306292	1.18886	0.069	0.282151	158
EnOC	chromMAGMA	NA	NA	AP1FJ_Q2	252	0.288198	1.16239	0.069	0.30016	209
MOC	MAGMA	ENSG00000068305	RSRFC4	RSRFC4_01	235	0.405077	1.12762	0.069	0.618392	85
LGSOC	MAGMA	NA	NA	GGAANCGGAANY_UNKNOWN	105	0.445043	1.18009	0.069	0.734624	28
MOC	MAGMA	NA	NA	TGATTTRY_GFI1_01	276	0.39997	1.12399	0.069	0.641711	87
EnOC	MAGMA	ENSG00000177606	AP1	AP1_C	265	0.39538	1.11474	0.07	0.541979	117
EnOC	MAGMA	ENSG00000123268	ATF1	ATF1_Q6	231	0.399353	1.12447	0.07	0.552184	97
NMOC	MAGMA	NA	NA	GKCGCNNNNNNNTGAYG_UNKNOWN	54	0.514722	1.25448	0.07	0.320264	22
EnOC	MAGMA	ENSG00000096401	CDC5	CDC5_01	250	0.395162	1.11855	0.07	0.559885	106
NMOC	MAGMA	NA	NA	RACTNNRTTTNC_UNKNOWN	118	0.45878	1.17617	0.07	0.378573	66
CCOC	MAGMA	ENSG00000129152	MYOD	MYOD_Q6	237	0.395428	1.12225	0.07	0.516293	111
CCOC	MAGMA	ENSG00000122861	ATF	ATF_B	185	0.40564	1.14055	0.07	0.522238	80
HGSOC	chromMAGMA	ENSG00000167074	TEF	TEF_Q6	233	0.338301	1.2187	0.035	0.256229	135
HGSOC	MAGMA	ENSG00000140262	HEB	HEB_Q6	246	0.431705	1.13457	0.065	0.398048	135
MOC	MAGMA	ENSG00000129654	HFH4	HFH4_01	189	0.411955	1.14215	0.07	0.551067	74
EnOC	chromMAGMA	NA	NA	SYATTGTG_UNKNOWN	206	0.293515	1.18153	0.07	0.273003	182
EnOC	chromMAGMA	ENSG00000143190	POU2F1	OCT1_06	224	0.29234	1.17968	0.07	0.273093	186
CCOC	chromMAGMA	ENSG00000134323	NMYC	NMYC_01	262	0.288405	1.17382	0.07	0.274951	199
EnOC	chromMAGMA	ENSG00000138795	LEF1	LEF1_Q6	242	0.28795	1.17023	0.07	0.286634	199
NMOC	chromMAGMA	ENSG00000143437	ARNT	ARNT_01	253	0.324244	1.16935	0.07	0.269143	220
HGSOC	chromMAGMA	NA	NA	CETS1P54_01	254	0.335247	1.21795	0.039	0.256698	136
LGSOC	chromMAGMA	ENSG00000152977	ZIC1	ZIC1_01	243	0.299256	1.17682	0.07	0.306172	169
LGSOC	chromMAGMA	ENSG00000057252	STAT	STAT_01	239	0.295868	1.16513	0.07	0.323293	185
LGSOC	MAGMA	ENSG00000100219	XBP1	XBP1_01	131	0.435274	1.15637	0.07	0.825985	38
CCOC	MAGMA	NA	NA	ERR1_Q2	252	0.394343	1.12064	0.071	0.525374	112
LGSOC	chromMAGMA	NA	NA	CCGNMNNTNACG_UNKNOWN	76	0.346676	1.26537	0.071	0.219024	74
HGSOC	MAGMA	ENSG00000100219	XBP1	XBP1_01	131	0.439722	1.13441	0.122	0.396107	136
MOC	chromMAGMA	ENSG00000126746	CIZ	CIZ_01	220	0.301781	1.18461	0.071	0.24768	190
EnOC	chromMAGMA	ENSG00000122861	ATF	ATF_B	179	0.29863	1.19507	0.071	0.250473	167
NMOC	chromMAGMA	NA	NA	E2F1DP1_01	220	0.329728	1.18384	0.071	0.255886	194
EnOC	chromMAGMA	NA	NA	SREBP_Q3	243	0.288966	1.17397	0.071	0.279351	195
EnOC	chromMAGMA	ENSG00000143190	POU2F1	OCT1_05	218	0.289675	1.16657	0.071	0.295291	202
LGSOC	MAGMA	NA	NA	ACTWSNACTNY_UNKNOWN	102	0.446332	1.1824	0.071	0.759013	26
EnOC	MAGMA	ENSG00000177606	AP1	AP1_Q6	247	0.395562	1.11716	0.072	0.543438	112
NMOC	MAGMA	NA	NA	CAGNYGKNAAA_UNKNOWN	74	0.48506	1.20754	0.072	0.320623	46
CCOC	MAGMA	ENSG00000122861	ATF	ATF_01	253	0.396294	1.12524	0.072	0.519152	105
HGSOC	chromMAGMA	ENSG00000115415	STAT1	STAT1_03	232	0.336263	1.21553	0.032	0.262968	137
LGSOC	MAGMA	ENSG00000085276	MECOM	EVI1_05	169	0.419332	1.13837	0.072	0.826471	52
EnOC	chromMAGMA	ENSG00000133110	POSTN	OSF2_Q6	240	0.289511	1.17373	0.072	0.278702	196
CCOC	chromMAGMA	ENSG00000129152	MYOD	MYOD_Q6_01	235	0.287487	1.16379	0.072	0.294302	210
HGSOC	MAGMA	NA	NA	GGCKCATGS_UNKNOWN	68	0.451068	1.1334	0.195	0.399232	137
HGSOC	chromMAGMA	ENSG00000106331	PAX4	PAX4_01	246	0.333	1.21149	0.044	0.274192	138
LGSOC	chromMAGMA	NA	NA	CACCCBINDINGFACTOR_Q6	254	0.295526	1.17262	0.072	0.315369	173
LGSOC	chromMAGMA	NA	NA	E2F_03	229	0.295533	1.17199	0.072	0.314241	175
LGSOC	chromMAGMA	NA	NA	IK2_01	251	0.296438	1.16427	0.072	0.323446	187
LGSOC	chromMAGMA	ENSG00000128272	ATF4	ATF4_Q2	236	0.294679	1.16322	0.072	0.325893	188
EnOC	MAGMA	NA	NA	GGCKCATGS_UNKNOWN	68	0.455675	1.21328	0.072	0.508369	21
MOC	chromMAGMA	ENSG00000125618	PAX8	PAX8_01	36	0.393822	1.33242	0.0721443	0.132124	50
CCOC	MAGMA	NA	NA	CCANNAGRKGGC_UNKNOWN	113	0.428873	1.18018	0.073	0.472824	43
HGSOC	MAGMA	ENSG00000138795	LEF1	LEF1_Q6	255	0.429126	1.13336	0.062	0.396621	138
EnOC	MAGMA	ENSG00000215612	HMX1	HMX1_01	41	0.484212	1.24019	0.073	0.556924	12
LGSOC	chromMAGMA	NA	NA	CYTAGCAAY_UNKNOWN	138	0.3197	1.22311	0.073	0.238459	120
NMOC	chromMAGMA	ENSG00000099326	MZF1	MZF1_02	221	0.324446	1.16982	0.073	0.270198	218
CCOC	chromMAGMA	ENSG00000140968	ICSBP	ICSBP_Q6	236	0.288247	1.16107	0.073	0.299316	213
LGSOC	chromMAGMA	ENSG00000102145	GATA1	GATA1_01	220	0.299741	1.17393	0.073	0.313681	171
LGSOC	chromMAGMA	NA	NA	CREL_01	243	0.29562	1.16494	0.073	0.322302	186
LGSOC	chromMAGMA	ENSG00000162676	GFI1	GFI1_01	244	0.294226	1.16197	0.073	0.320925	194
HGSOC	MAGMA	NA	NA	ACTAYRNNNCCCR_UNKNOWN	429	0.425121	1.13184	0.028	0.402885	139
LGSOC	MAGMA	NA	NA	CCCNNNNNNAAGWT_UNKNOWN	100	0.449994	1.18886	0.073	0.733582	24
NMOC	MAGMA	NA	NA	YTTCCNNNGGAMR_UNKNOWN	49	0.511609	1.25478	0.074	0.333895	21
MOC	chromMAGMA	NA	NA	YTCCCRNNAGGY_UNKNOWN	65	0.353962	1.27352	0.074	0.17283	84
CCOC	MAGMA	ENSG00000112658	SRF	SRF_Q4	216	0.397599	1.12392	0.074	0.520703	107
NMOC	MAGMA	ENSG00000141646	SMAD4	SMAD4_Q6	233	0.433035	1.12659	0.074	0.489858	116
NMOC	MAGMA	NA	NA	SRY_02	247	0.429524	1.12182	0.074	0.495202	124
CCOC	MAGMA	ENSG00000118260	CREB	CREB_02	242	0.393363	1.11571	0.074	0.555652	115
LGSOC	chromMAGMA	NA	NA	GGAANCGGAANY_UNKNOWN	105	0.326427	1.23098	0.074	0.228632	113
EnOC	MAGMA	ENSG00000197576	HOXA4	HOXA4_Q2	259	0.394567	1.11289	0.074	0.549435	119
EnOC	MAGMA	ENSG00000100105	MAZR	MAZR_01	216	0.399251	1.12157	0.074	0.552415	102
NMOC	chromMAGMA	ENSG00000198081	ZF5	ZF5_B	225	0.329203	1.18875	0.074	0.251073	186
CCOC	chromMAGMA	NA	NA	SRY_01	205	0.290674	1.177	0.074	0.267424	197
MOC	chromMAGMA	ENSG00000135457	CP2	CP2_02	234	0.295983	1.1712	0.074	0.269536	207
NMOC	chromMAGMA	ENSG00000101076	HNF4	HNF4_DR1_Q3	246	0.324862	1.17771	0.074	0.260964	205
NMOC	chromMAGMA	NA	NA	E2F4DP2_01	220	0.329728	1.17656	0.074	0.262112	207
EnOC	chromMAGMA	ENSG00000071564	E2A	E2A_Q2	220	0.289275	1.17011	0.074	0.284195	201
LGSOC	MAGMA	ENSG00000076356	OCT	OCT_C	237	0.407643	1.11947	0.074	0.816403	73
LGSOC	chromMAGMA	ENSG00000167825	OLF1	OLF1_01	248	0.296179	1.17187	0.074	0.312922	176
LGSOC	chromMAGMA	ENSG00000118513	MYB	MYB_Q5_01	247	0.296772	1.16946	0.074	0.320522	177
LGSOC	chromMAGMA	ENSG00000134954	ETS1	ETS1_B	249	0.29267	1.15828	0.074	0.322174	202
EnOC	MAGMA	NA	NA	AAGWWRNYGGC_UNKNOWN	116	0.421791	1.15506	0.074	0.500744	62
CCOC	MAGMA	NA	NA	TAXCREB_02	26	0.520572	1.28765	0.0741483	0.364305	9
EnOC	MAGMA	ENSG00000118260	CREB	CREB_01	257	0.392994	1.11509	0.075	0.543271	116
LGSOC	chromMAGMA	NA	NA	MCAATNNNNNGCG_UNKNOWN	79	0.346453	1.26619	0.075	0.219763	73
CCOC	chromMAGMA	ENSG00000112658	SRF	SRF_Q6	225	0.291511	1.17086	0.075	0.279655	203
NMOC	chromMAGMA	ENSG00000125482	TTF1	TTF1_Q6	237	0.325844	1.16669	0.075	0.272649	224
EnOC	chromMAGMA	NA	NA	RRCCGTTA_UNKNOWN	82	0.336029	1.25538	0.076	0.187681	100
CCOC	chromMAGMA	NA	NA	YTAAYNGCT_UNKNOWN	133	0.311347	1.21808	0.076	0.210509	148
NMOC	MAGMA	ENSG00000184486	POU3F2	POU3F2_02	250	0.428848	1.11614	0.076	0.508195	132
HGSOC	chromMAGMA	NA	NA	NKX25_01	109	0.348542	1.2109	0.101	0.2744	139
EnOC	chromMAGMA	NA	NA	AHRARNT_01	131	0.310021	1.21706	0.076	0.229597	137
MOC	chromMAGMA	NA	NA	GATA_C	240	0.298647	1.17001	0.076	0.270961	209
EnOC	MAGMA	ENSG00000106331	PAX4	PAX4_03	249	0.394654	1.11737	0.076	0.546144	111
CCOC	chromMAGMA	NA	NA	MYOGENIN_Q6	240	0.284793	1.15723	0.076	0.300959	222
LGSOC	chromMAGMA	NA	NA	SREBP_Q3	243	0.290894	1.1495	0.076	0.342471	211
HGSOC	MAGMA	ENSG00000172845	SP3	SP3_Q3	235	0.429555	1.12996	0.081	0.41138	140
LGSOC	chromMAGMA	NA	NA	RGAANNTTC_HSF1_01	416	0.277985	1.12511	0.076	0.368965	258
HGSOC	chromMAGMA	NA	NA	KTGGYRSGAA_UNKNOWN	72	0.358669	1.2092	0.137	0.278035	140
LGSOC	MAGMA	NA	NA	E2F_Q6_01	225	0.412465	1.12559	0.076	0.789242	68
CCOC	MAGMA	ENSG00000068305	MEF2	MEF2_04	25	0.524044	1.29228	0.0762287	0.43624	7
LGSOC	MAGMA	ENSG00000148516	AREB6	AREB6_03	250	0.405332	1.11504	0.077	0.83373	77
CCOC	MAGMA	ENSG00000082175	PGR	PR_01	141	0.413276	1.14829	0.077	0.478065	76
CCOC	MAGMA	NA	NA	NFKB_Q6_01	230	0.395765	1.12276	0.077	0.516613	110
NMOC	chromMAGMA	NA	NA	RYTGCNNRGNAAC_MIF1_01	80	0.372986	1.25173	0.077	0.189839	111
LGSOC	MAGMA	ENSG00000113580	GR	GR_Q6_01	256	0.405443	1.11187	0.077	0.834639	81
CCOC	MAGMA	NA	NA	T3R_Q6	244	0.393737	1.11391	0.077	0.55808	118
HGSOC	chromMAGMA	ENSG00000171786	HEN1	HEN1_01	184	0.337656	1.20858	0.058	0.278129	141
MOC	chromMAGMA	ENSG00000085276	MECOM	EVI1_05	159	0.309563	1.19523	0.077	0.247267	166
HGSOC	MAGMA	ENSG00000105516	DBP	DBP_Q6	248	0.428953	1.12962	0.078	0.410484	141
EnOC	chromMAGMA	ENSG00000123405	NFE2	NFE2_01	249	0.283135	1.1529	0.077	0.319646	220
HGSOC	chromMAGMA	ENSG00000132005	RFX1	RFX1_01	234	0.331164	1.20679	0.032	0.282151	142
EnOC	chromMAGMA	NA	NA	RGAGGAARY_PU1_Q6	481	0.269327	1.12735	0.077	0.363026	259
LGSOC	MAGMA	NA	NA	CDPCR3_01	54	0.476735	1.22914	0.077	1	7
HGSOC	MAGMA	ENSG00000065970	FOXJ2	FOXJ2_01	177	0.432523	1.1293	0.108	0.409672	142
NMOC	chromMAGMA	NA	NA	HOX13_01	41	0.417326	1.3249	0.078	0.148547	56
MOC	chromMAGMA	NA	NA	GGCNNMSMYNTTG_UNKNOWN	71	0.349959	1.28032	0.078	0.161685	82
HGSOC	chromMAGMA	NA	NA	TGATTTRY_GFI1_01	259	0.331368	1.20632	0.036	0.281759	143
MOC	chromMAGMA	NA	NA	WCTCNATGGY_UNKNOWN	75	0.343547	1.2464	0.078	0.194195	108
MOC	chromMAGMA	NA	NA	CATRRAGC_UNKNOWN	121	0.323446	1.23492	0.078	0.207144	118
NMOC	chromMAGMA	NA	NA	CATRRAGC_UNKNOWN	121	0.347966	1.20934	0.078	0.230425	157
LGSOC	MAGMA	ENSG00000125347	IRF1	IRF1_Q6	251	0.404676	1.10989	0.078	0.85305	82
MOC	MAGMA	ENSG00000085276	MECOM	EVI1_03	58	0.471976	1.22888	0.078	0.675132	13
EnOC	chromMAGMA	NA	NA	IK3_01	207	0.290301	1.17406	0.078	0.280477	194
MOC	chromMAGMA	ENSG00000076356	OCT	OCT_Q6	227	0.294579	1.16442	0.078	0.280691	216
NMOC	chromMAGMA	ENSG00000139515	IPF1	IPF1_Q4	222	0.323794	1.16479	0.078	0.273882	228
CCOC	chromMAGMA	ENSG00000068305	MEF2	MEF2_03	216	0.289526	1.161	0.078	0.298192	214
LGSOC	chromMAGMA	ENSG00000137309	HMGIY	HMGIY_Q6	231	0.293832	1.16745	0.078	0.317569	183
NMOC	MAGMA	NA	NA	HNF3_Q6	180	0.437676	1.13213	0.079	0.471727	110
CCOC	MAGMA	ENSG00000102145	GATA1	GATA1_04	238	0.393308	1.11725	0.079	0.551253	113
NMOC	MAGMA	ENSG00000072310	SREBP1	SREBP1_Q6	240	0.431326	1.12032	0.079	0.491251	128
NMOC	MAGMA	NA	NA	NFKB_Q6	246	0.429402	1.11619	0.079	0.511708	131
NMOC	chromMAGMA	ENSG00000125347	IRF1	IRF1_01	232	0.322728	1.16421	0.079	0.274722	229
LGSOC	chromMAGMA	NA	NA	HNF4ALPHA_Q6	241	0.295647	1.17471	0.079	0.312483	170
HGSOC	MAGMA	ENSG00000122034	AP2	AP2_Q3	246	0.428535	1.12724	0.081	0.419278	143
LGSOC	chromMAGMA	ENSG00000071564	E47	E47_01	236	0.292872	1.15855	0.079	0.324405	200
MOC	MAGMA	NA	NA	GABP_B	258	0.400052	1.1165	0.079	0.664224	95
NMOC	chromMAGMA	NA	NA	YTTCCNNNGGAMR_UNKNOWN	48	0.413339	1.32107	0.08	0.147488	59
EnOC	chromMAGMA	NA	NA	YTCCCRNNAGGY_UNKNOWN	65	0.344654	1.28242	0.08	0.163933	79
NMOC	MAGMA	ENSG00000135100	HNF1	HNF1_C	239	0.430818	1.12545	0.08	0.494749	117
MOC	chromMAGMA	NA	NA	RACTNNRTTTNC_UNKNOWN	113	0.324849	1.21742	0.08	0.225651	136
EnOC	MAGMA	ENSG00000100644	HIF1A	HIF1_Q3	228	0.396533	1.11855	0.08	0.55468	107
CCOC	chromMAGMA	ENSG00000115297	NCX	NCX_01	162	0.30063	1.19571	0.08	0.238855	174
CCOC	MAGMA	ENSG00000105392	CRX	CRX_Q4	260	0.39115	1.11267	0.08	0.560114	120
CCOC	MAGMA	ENSG00000123405	NFE2	NFE2_01	259	0.389233	1.11117	0.08	0.560268	123
HGSOC	chromMAGMA	ENSG00000106331	PAX4	PAX4_03	238	0.333763	1.20617	0.043	0.280386	144
MOC	chromMAGMA	ENSG00000169083	AR	AR_01	144	0.313206	1.19677	0.08	0.252789	159
NMOC	chromMAGMA	NA	NA	E2F4DP1_01	222	0.325146	1.16903	0.08	0.268821	221
NMOC	chromMAGMA	NA	NA	HNF4ALPHA_Q6	241	0.323516	1.16546	0.08	0.272862	227
MOC	chromMAGMA	ENSG00000175832	PEA3	PEA3_Q6	243	0.293956	1.15723	0.08	0.290938	227
CCOC	chromMAGMA	ENSG00000043355	ZIC2	ZIC2_01	234	0.286049	1.16089	0.08	0.297284	215
HGSOC	MAGMA	ENSG00000106546	AHR	AHR_01	58	0.449701	1.12669	0.216	0.419735	144
LGSOC	chromMAGMA	NA	NA	ETS_Q4	236	0.292172	1.14766	0.08	0.340467	217
HGSOC	chromMAGMA	ENSG00000184486	POU3F2	POU3F2_02	228	0.332894	1.20535	0.051	0.281351	145
HGSOC	MAGMA	ENSG00000143190	POU2F1	OCT1_Q6	247	0.428036	1.12636	0.079	0.418916	145
MOC	chromMAGMA	NA	NA	CCAWNWWNNNGGC_UNKNOWN	79	0.340506	1.24204	0.081	0.198674	112
CCOC	MAGMA	ENSG00000125398	SOX9	SOX9_B1	229	0.399504	1.13	0.081	0.545728	92
EnOC	chromMAGMA	NA	NA	CCANNAGRKGGC_UNKNOWN	111	0.316675	1.22026	0.081	0.225224	134
EnOC	MAGMA	ENSG00000125798	HNF3B	HNF3B_01	206	0.399954	1.1226	0.081	0.547992	101
NMOC	chromMAGMA	NA	NA	GATA_Q6	182	0.330782	1.17824	0.081	0.261855	203
LGSOC	chromMAGMA	ENSG00000198081	ZF5	ZF5_B	225	0.293452	1.15315	0.081	0.334346	207
HGSOC	chromMAGMA	ENSG00000178573	MAF	MAF_Q6	244	0.330917	1.20485	0.051	0.281226	146
HGSOC	MAGMA	ENSG00000109101	WHN	WHN_B	251	0.42696	1.12627	0.085	0.416547	146
HGSOC	chromMAGMA	ENSG00000115966	CREBP1	CREBP1_Q2	241	0.331486	1.2047	0.057	0.279803	147
CCOC	chromMAGMA	ENSG00000085276	MECOM	EVI1_06	20	0.4392	1.36596	0.0819672	0.0991916	43
MOC	chromMAGMA	NA	NA	YRCCAKNNGNCGC_UNKNOWN	61	0.359511	1.28304	0.082	0.160022	80
NMOC	MAGMA	NA	NA	YAATNRNNNYNATT_UNKNOWN	100	0.465648	1.18168	0.082	0.36667	62
HGSOC	MAGMA	NA	NA	AACWWCAANK_UNKNOWN	139	0.436783	1.12613	0.125	0.414639	147
MOC	chromMAGMA	ENSG00000157557	ETS2	ETS2_B	266	0.288559	1.15304	0.082	0.292654	237
CCOC	chromMAGMA	ENSG00000106331	PAX4	PAX4_01	246	0.288818	1.16392	0.082	0.295275	209
CCOC	chromMAGMA	ENSG00000118513	MYB	MYB_Q5_01	247	0.2835	1.15157	0.082	0.309056	231
EnOC	chromMAGMA	ENSG00000125347	IRF1	IRF1_Q6	235	0.285705	1.15548	0.082	0.312664	218
LGSOC	chromMAGMA	ENSG00000099326	MZF1	MZF1_01	225	0.295414	1.16826	0.082	0.316307	182
LGSOC	chromMAGMA	NA	NA	PAX_Q6	231	0.295296	1.16198	0.082	0.322547	193
EnOC	chromMAGMA	NA	NA	WGGAATGY_TEF1_Q6	346	0.275426	1.1428	0.082	0.335483	236
LGSOC	MAGMA	ENSG00000158773	USF	USF_Q6_01	234	0.407771	1.11422	0.082	0.813768	80
MOC	chromMAGMA	ENSG00000168610	STAT3	STAT3_01	21	0.439124	1.36706	0.0829918	0.138667	30
LGSOC	MAGMA	ENSG00000117505	DR1	DR1_Q3	245	0.403099	1.10493	0.083	0.873427	87
NMOC	MAGMA	ENSG00000171786	HEN1	HEN1_01	194	0.436086	1.13177	0.083	0.470297	111
MOC	chromMAGMA	ENSG00000167034	NKX3A	NKX3A_01	200	0.30214	1.17743	0.083	0.26169	197
HGSOC	chromMAGMA	NA	NA	NFY_Q6	230	0.331942	1.20288	0.064	0.283969	148
LGSOC	MAGMA	ENSG00000076356	OCT	OCT_Q6	237	0.408288	1.11885	0.083	0.80302	75
LGSOC	chromMAGMA	ENSG00000143190	POU2F1	OCT1_06	224	0.295983	1.16191	0.083	0.319536	195
HGSOC	MAGMA	ENSG00000231924	SP1	SP1_Q2_01	241	0.427504	1.12591	0.084	0.413324	148
HGSOC	chromMAGMA	ENSG00000100811	YY1	YY1_02	236	0.331176	1.19859	0.049	0.296621	149
LGSOC	MAGMA	NA	NA	AP3_Q6	235	0.407843	1.11636	0.083	0.826762	76
MOC	MAGMA	NA	NA	NFKB_Q6_01	230	0.401453	1.11697	0.083	0.666013	94
HGSOC	MAGMA	NA	NA	YTAATTAA_LHX3_01	187	0.431315	1.12543	0.094	0.413873	149
HGSOC	MAGMA	NA	NA	NERF_Q2	238	0.429526	1.12482	0.094	0.415001	150
LGSOC	MAGMA	ENSG00000118260	CREB	CREB_Q2	257	0.402212	1.10621	0.084	0.864312	86
NMOC	MAGMA	NA	NA	CDPCR1_01	123	0.4555	1.16295	0.084	0.371267	84
NMOC	MAGMA	NA	NA	CACBINDINGPROTEIN_Q6	238	0.42977	1.11734	0.084	0.510423	129
HGSOC	chromMAGMA	NA	NA	MEIS1BHOXA9_01	129	0.342643	1.19848	0.095	0.295084	150
MOC	MAGMA	ENSG00000167034	NKX3A	NKX3A_01	222	0.40369	1.1182	0.084	0.666749	92
NMOC	chromMAGMA	ENSG00000100811	YY1	YY1_02	236	0.319551	1.15286	0.084	0.288607	249
LGSOC	chromMAGMA	NA	NA	NFKB_Q6_01	224	0.299403	1.16936	0.084	0.315602	180
HGSOC	chromMAGMA	ENSG00000185630	PBX1	PBX1_01	233	0.332215	1.1974	0.057	0.2968	151
EnOC	MAGMA	ENSG00000115415	STAT1	STAT1_03	240	0.394074	1.10949	0.084	0.57221	121
MOC	MAGMA	NA	NA	RNCTGNYNRNCTGNY_UNKNOWN	76	0.442515	1.18536	0.084	0.523438	36
CCOC	MAGMA	ENSG00000071564	TCF3	E12_Q6	254	0.393996	1.11673	0.085	0.55127	114
MOC	chromMAGMA	ENSG00000118513	MYB	MYB_Q6	226	0.295574	1.16316	0.085	0.282473	218
NMOC	chromMAGMA	ENSG00000143995	MEIS1	MEIS1_01	227	0.323924	1.16846	0.085	0.26953	222
EnOC	chromMAGMA	ENSG00000125482	TTF1	TTF1_Q6	237	0.28832	1.16376	0.085	0.301029	205
EnOC	chromMAGMA	ENSG00000214022	AP4	AP4_Q6	199	0.288261	1.16403	0.085	0.30148	204
HGSOC	MAGMA	ENSG00000142937	RPS8	S8_01	239	0.428655	1.1247	0.077	0.412974	151
MOC	MAGMA	NA	NA	GATA_Q6	189	0.407674	1.12666	0.085	0.621598	86
MOC	MAGMA	ENSG00000122034	AP2	AP2_Q3	246	0.397163	1.11213	0.086	0.664188	102
HGSOC	MAGMA	ENSG00000132005	EFC	EFC_Q6	260	0.425129	1.12279	0.082	0.422075	152
EnOC	chromMAGMA	NA	NA	RYCACNNRNNRNCAG_UNKNOWN	67	0.340354	1.26966	0.086	0.171535	90
NMOC	MAGMA	NA	NA	CATRRAGC_UNKNOWN	131	0.454739	1.15518	0.086	0.399224	89
NMOC	MAGMA	ENSG00000143190	POU2F1	OCT1_02	204	0.434836	1.12716	0.086	0.490256	115
NMOC	MAGMA	ENSG00000214022	AP4	AP4_Q6_01	240	0.429482	1.12312	0.086	0.492704	122
HGSOC	chromMAGMA	ENSG00000052850	ALX4	ALX4_01	15	0.434528	1.19727	0.230769	0.295348	152
MOC	MAGMA	ENSG00000138795	LEF1	LEF1_Q6	255	0.39881	1.11028	0.086	0.677733	103
MOC	chromMAGMA	ENSG00000091831	ESR1	ER_Q6	251	0.290826	1.15235	0.086	0.292709	239
CCOC	chromMAGMA	NA	NA	GTGGGTGK_UNKNOWN	273	0.283641	1.1505	0.086	0.307642	235
LGSOC	chromMAGMA	ENSG00000231924	SP1	SP1_01	227	0.292826	1.15516	0.086	0.327858	206
LGSOC	chromMAGMA	ENSG00000101412	E2F1	E2F1_Q6_01	226	0.294963	1.15256	0.086	0.33355	209
MOC	MAGMA	NA	NA	ACAWNRNSRCGG_UNKNOWN	61	0.457638	1.20024	0.086	0.55619	26
EnOC	MAGMA	NA	NA	HMEF2_Q6	137	0.412266	1.14596	0.086	0.502042	73
CCOC	MAGMA	ENSG00000143190	POU2F1	OCT1_07	156	0.407568	1.13937	0.087	0.520747	82
HGSOC	chromMAGMA	ENSG00000122034	AP2	AP2_Q6_01	254	0.330913	1.19702	0.044	0.294372	153
EnOC	chromMAGMA	ENSG00000120690	ELF1	ELF1_Q6	231	0.290861	1.17796	0.087	0.272878	190
MOC	chromMAGMA	ENSG00000112658	SRF	SRF_Q4	207	0.297974	1.16722	0.087	0.276757	212
MOC	chromMAGMA	ENSG00000068305	RSRFC4	RSRFC4_01	224	0.293941	1.16218	0.087	0.281843	221
NMOC	chromMAGMA	NA	NA	TCCCRNNRTGC_UNKNOWN	204	0.326267	1.17369	0.087	0.263869	213
HGSOC	MAGMA	ENSG00000091831	ESR1	ER_Q6_02	249	0.425512	1.12247	0.069	0.421232	153
NMOC	chromMAGMA	NA	NA	NFKAPPAB_01	237	0.321906	1.16031	0.087	0.283877	232
LGSOC	chromMAGMA	NA	NA	LFA1_Q6	236	0.295188	1.16189	0.087	0.317998	196
HGSOC	chromMAGMA	ENSG00000136352	TITF1	TITF1_Q3	224	0.333218	1.19643	0.046	0.294689	154
MOC	chromMAGMA	ENSG00000169083	AR	AR_02	34	0.386966	1.30179	0.0871743	0.143915	69
EnOC	MAGMA	ENSG00000143437	ARNT	ARNT_02	238	0.395935	1.11745	0.088	0.550282	110
EnOC	chromMAGMA	ENSG00000136244	HSF	HSF_Q6	189	0.293403	1.18065	0.088	0.271513	185
MOC	chromMAGMA	ENSG00000231924	SP1	SP1_Q4_01	243	0.291734	1.15384	0.088	0.292535	235
LGSOC	chromMAGMA	ENSG00000108924	HLF	HLF_01	236	0.295235	1.15842	0.088	0.323289	201
HGSOC	MAGMA	NA	NA	ACTWSNACTNY_UNKNOWN	102	0.442034	1.12232	0.17	0.419522	154
MOC	MAGMA	NA	NA	AGCYRWTTC_UNKNOWN	115	0.424099	1.15226	0.088	0.550559	62
LGSOC	MAGMA	NA	NA	GCTNWTTGK_UNKNOWN	296	0.399148	1.09917	0.088	0.859416	97
MOC	MAGMA	NA	NA	SRY_01	213	0.402449	1.11772	0.088	0.66485	93
EnOC	MAGMA	NA	NA	TAANNYSGCG_UNKNOWN	77	0.438406	1.18207	0.088	0.510165	37
MOC	MAGMA	ENSG00000135457	CP2	CP2_02	241	0.399871	1.11908	0.089	0.664712	91
CCOC	chromMAGMA	NA	NA	RYTGCNNRGNAAC_MIF1_01	80	0.332655	1.24962	0.089	0.168018	122
EnOC	chromMAGMA	NA	NA	TGTYNNNNNRGCARM_UNKNOWN	79	0.328836	1.23346	0.089	0.201351	126
CCOC	MAGMA	ENSG00000158773	USF	USF_02	266	0.388428	1.10737	0.089	0.547111	134
CCOC	MAGMA	NA	NA	ACCTGTTG_UNKNOWN	150	0.402359	1.13101	0.089	0.547853	90
NMOC	MAGMA	ENSG00000102145	GATA1	GATA1_02	236	0.430117	1.12522	0.089	0.49237	118
CCOC	MAGMA	NA	NA	CMYB_01	244	0.389896	1.10569	0.089	0.554011	136
LGSOC	MAGMA	ENSG00000101076	HNF4	HNF4_DR1_Q3	251	0.406516	1.11465	0.089	0.818092	79
EnOC	chromMAGMA	ENSG00000251493	FREAC4	FREAC4_01	141	0.305294	1.19695	0.089	0.255021	160
MOC	chromMAGMA	ENSG00000123405	NFE2	NFE2_01	249	0.291285	1.15392	0.089	0.293559	234
CCOC	chromMAGMA	ENSG00000167825	OLF1	OLF1_01	248	0.285646	1.16325	0.089	0.294706	211
NMOC	chromMAGMA	ENSG00000101412	E2F1	E2F1_Q6	218	0.323822	1.15496	0.089	0.289791	242
LGSOC	MAGMA	ENSG00000186951	PPAR	PPAR_DR1_Q2	249	0.403826	1.10813	0.089	0.867583	83
LGSOC	MAGMA	NA	NA	WWTAAGGC_UNKNOWN	139	0.420581	1.13067	0.089	0.818976	60
EnOC	MAGMA	NA	NA	YWATTWNNRGCT_UNKNOWN	68	0.445404	1.18461	0.089	0.501416	36
NMOC	MAGMA	NA	NA	GGGNRMNNYCAT_UNKNOWN	78	0.478392	1.19008	0.09	0.387355	51
CCOC	MAGMA	ENSG00000076356	OCT	OCT_C	237	0.389985	1.10738	0.09	0.551105	133
NMOC	chromMAGMA	NA	NA	NKX25_01	109	0.357368	1.22559	0.09	0.213984	138
CCOC	MAGMA	ENSG00000068305	MEF2	MEF2_Q6_01	236	0.393591	1.11317	0.09	0.560038	119
CCOC	chromMAGMA	NA	NA	AHRARNT_01	131	0.304804	1.18568	0.09	0.251008	188
CCOC	chromMAGMA	ENSG00000065970	FOXJ2	FOXJ2_01	166	0.300405	1.18191	0.09	0.255181	194
NMOC	chromMAGMA	NA	NA	TMTCGCGANR_UNKNOWN	159	0.339441	1.19298	0.09	0.247868	179
LGSOC	chromMAGMA	NA	NA	GGCNKCCATNK_UNKNOWN	116	0.322858	1.20824	0.09	0.263583	132
NMOC	chromMAGMA	NA	NA	SRY_02	236	0.323168	1.15809	0.09	0.285305	237
NMOC	chromMAGMA	ENSG00000231924	SP1	SP1_Q4_01	243	0.319752	1.15356	0.09	0.288478	247
CCOC	chromMAGMA	ENSG00000118260	CREB	CREB_Q2	252	0.285276	1.15168	0.09	0.309991	230
CCOC	chromMAGMA	ENSG00000166888	STAT6	STAT6_02	238	0.285826	1.14928	0.09	0.310617	236
EnOC	chromMAGMA	ENSG00000091831	ESR1	ER_Q6_01	252	0.285495	1.15231	0.09	0.320508	221
HGSOC	chromMAGMA	ENSG00000134954	ETS1	ETS1_B	249	0.329154	1.19625	0.051	0.293388	155
EnOC	MAGMA	ENSG00000186951	PPARA	PPARA_02	127	0.418168	1.14434	0.09	0.483657	78
MOC	MAGMA	NA	NA	CCCNNNNNNAAGWT_UNKNOWN	100	0.433073	1.16744	0.09	0.524465	50
MOC	MAGMA	NA	NA	CDPCR1_01	123	0.422284	1.14877	0.09	0.517886	70
EnOC	MAGMA	NA	NA	SMAD_Q6	247	0.395248	1.11302	0.09	0.552786	118
MOC	MAGMA	ENSG00000102145	GATA1	GATA1_02	236	0.399645	1.11366	0.091	0.661559	100
LGSOC	chromMAGMA	NA	NA	GKCGCNNNNNNNTGAYG_UNKNOWN	54	0.363651	1.26808	0.091	0.223478	70
CCOC	chromMAGMA	ENSG00000168310	IRF2	IRF2_01	118	0.311114	1.20982	0.091	0.2193	158
NMOC	MAGMA	ENSG00000169083	AR	AR_Q6	243	0.427537	1.1124	0.091	0.522759	136
CCOC	MAGMA	ENSG00000152977	ZIC1	ZIC1_01	252	0.39289	1.10958	0.091	0.556979	127
CCOC	chromMAGMA	NA	NA	TAXCREB_01	129	0.305464	1.19227	0.091	0.241137	180
MOC	chromMAGMA	ENSG00000136244	HSF	HSF_Q6	189	0.300632	1.17391	0.091	0.264436	204
MOC	chromMAGMA	NA	NA	LMO2COM_01	240	0.296396	1.16789	0.091	0.275641	211
MOC	chromMAGMA	ENSG00000165417	GTF2A1	TFIIA_Q6	238	0.292041	1.1513	0.091	0.286702	247
NMOC	chromMAGMA	ENSG00000064835	POU1F1	POU1F1_Q6	211	0.324575	1.1675	0.091	0.271328	223
MOC	chromMAGMA	NA	NA	EGR_Q6	260	0.29073	1.14943	0.091	0.290921	249
MOC	chromMAGMA	ENSG00000100644	HIF1A	HIF1_Q3	220	0.293501	1.15543	0.091	0.290923	232
MOC	chromMAGMA	ENSG00000177606	AP1	AP1_Q2_01	252	0.289162	1.14901	0.091	0.291152	250
HGSOC	MAGMA	ENSG00000187140	FOXD3	FOXD3_01	191	0.429247	1.12166	0.107	0.420978	155
CCOC	chromMAGMA	NA	NA	SRY_02	236	0.285687	1.15937	0.091	0.298651	218
NMOC	chromMAGMA	ENSG00000134323	NMYC	NMYC_01	262	0.316305	1.14277	0.091	0.301794	267
LGSOC	chromMAGMA	ENSG00000153560	LBP1	LBP1_Q6	205	0.293473	1.14924	0.091	0.340364	213
HGSOC	chromMAGMA	NA	NA	TCF1P_Q6	249	0.329422	1.196	0.044	0.292335	156
HGSOC	MAGMA	ENSG00000134532	SOX5	SOX5_01	257	0.425004	1.12152	0.091	0.419216	156
HGSOC	chromMAGMA	NA	NA	LMO2COM_01	240	0.330603	1.19565	0.045	0.291575	157
NMOC	MAGMA	NA	NA	GGCNRNWCTTYS_UNKNOWN	81	0.472344	1.18533	0.092	0.356039	60
CCOC	MAGMA	NA	NA	WCAANNNYCAG_UNKNOWN	240	0.391659	1.10758	0.092	0.553522	132
CCOC	chromMAGMA	NA	NA	CDPCR1_01	115	0.31267	1.212	0.092	0.220219	153
NMOC	MAGMA	NA	NA	CATTGTYY_SOX9_B1	349	0.420024	1.1001	0.092	0.542879	158
EnOC	chromMAGMA	ENSG00000169083	AR	AR_01	144	0.306847	1.19809	0.092	0.256267	157
HGSOC	MAGMA	ENSG00000106459	NRF1	NRF1_Q6	250	0.423262	1.12113	0.083	0.418954	157
EnOC	chromMAGMA	ENSG00000129654	HFH4	HFH4_01	173	0.297049	1.17722	0.092	0.273912	191
MOC	chromMAGMA	ENSG00000113580	GR	GR_Q6_01	246	0.291275	1.15212	0.092	0.2887	243
EnOC	chromMAGMA	NA	NA	ISRE_01	232	0.279563	1.14041	0.092	0.33606	242
LGSOC	chromMAGMA	ENSG00000118260	CREB	CREB_Q2	252	0.288783	1.1416	0.092	0.341593	232
LGSOC	MAGMA	ENSG00000215788	TNFRSF25	DR3_Q4	141	0.424235	1.14347	0.092	0.855366	46
MOC	MAGMA	ENSG00000109101	WHN	WHN_B	251	0.398081	1.10655	0.092	0.654764	113
EnOC	MAGMA	ENSG00000100219	XBP1	XBP1_01	131	0.41277	1.13908	0.092	0.481882	86
HGSOC	MAGMA	NA	NA	TGACCTTG_SF1_Q6	234	0.428126	1.12093	0.1	0.417587	158
EnOC	MAGMA	NA	NA	ETS_Q4	242	0.395247	1.11586	0.092	0.540942	115
MOC	chromMAGMA	NA	NA	GGCKCATGS_UNKNOWN	66	0.349185	1.26191	0.093	0.17925	95
HGSOC	chromMAGMA	NA	NA	CDPCR3_01	50	0.366392	1.19484	0.201201	0.292428	158
EnOC	chromMAGMA	NA	NA	AACYNNNNTTCCS_UNKNOWN	93	0.322177	1.22475	0.093	0.216053	132
HGSOC	chromMAGMA	ENSG00000100644	HIF1A	HIF1_Q3	220	0.329889	1.19448	0.068	0.291828	159
NMOC	MAGMA	ENSG00000101076	HNF4	HNF4_DR1_Q3	251	0.42182	1.1037	0.093	0.541596	150
NMOC	MAGMA	ENSG00000108924	HLF	HLF_01	250	0.423545	1.10337	0.093	0.540857	151
MOC	chromMAGMA	ENSG00000143190	POU2F1	OCT1_04	203	0.30049	1.17093	0.093	0.269219	208
EnOC	chromMAGMA	ENSG00000057252	STAT	STAT_Q6	239	0.285937	1.15925	0.093	0.307203	212
EnOC	chromMAGMA	ENSG00000214022	AP4	AP4_01	247	0.284698	1.15699	0.093	0.310065	216
LGSOC	chromMAGMA	ENSG00000113580	GR	GR_Q6_01	246	0.288805	1.15275	0.093	0.334283	208
HGSOC	MAGMA	ENSG00000105392	CRX	CRX_Q4	260	0.426381	1.12048	0.081	0.417772	159
LGSOC	chromMAGMA	ENSG00000143437	ARNT	ARNT_02	236	0.289493	1.14706	0.093	0.339834	219
NMOC	chromMAGMA	NA	NA	TTCYNRGAA_STAT5B_01	310	0.313121	1.13829	0.093	0.304395	278
EnOC	chromMAGMA	NA	NA	RGTTAMWNATT_HNF1_01	66	0.338465	1.24551	0.094	0.195944	110
CCOC	MAGMA	ENSG00000112658	SRF	SRF_Q5_01	215	0.395441	1.11536	0.094	0.554121	116
LGSOC	chromMAGMA	NA	NA	GGCNNMSMYNTTG_UNKNOWN	71	0.341828	1.24466	0.094	0.225852	95
CCOC	MAGMA	ENSG00000117505	DR1	DR1_Q3	245	0.389887	1.10975	0.094	0.564282	125
MOC	chromMAGMA	ENSG00000143190	POU2F1	OCT1_B	230	0.291619	1.15218	0.094	0.290831	241
NMOC	chromMAGMA	NA	NA	NFAT_Q4_01	244	0.321329	1.15564	0.094	0.289872	240
EnOC	chromMAGMA	ENSG00000101076	HNF4	HNF4_Q6	254	0.280076	1.14754	0.094	0.330272	227
MOC	MAGMA	ENSG00000158773	USF	USF_Q6_01	234	0.396842	1.1035	0.094	0.647151	120
HGSOC	chromMAGMA	ENSG00000115415	STAT1	STAT1_02	242	0.327715	1.19336	0.055	0.293862	160
MOC	MAGMA	NA	NA	PAX_Q6	243	0.396664	1.10773	0.094	0.666212	109
HGSOC	MAGMA	NA	NA	CEBPGAMMA_Q6	242	0.425684	1.12017	0.105	0.41688	160
MOC	MAGMA	NA	NA	YTTCCNNNGGAMR_UNKNOWN	49	0.468782	1.211	0.094	0.59717	20
NMOC	MAGMA	ENSG00000091831	ESR1	ER_Q6_02	249	0.425926	1.11182	0.095	0.519981	138
NMOC	MAGMA	ENSG00000082175	PGR	PR_Q2	255	0.426169	1.11118	0.095	0.510531	142
LGSOC	MAGMA	ENSG00000197576	HOXA4	HOXA4_Q2	259	0.404122	1.10403	0.095	0.866655	89
CCOC	MAGMA	ENSG00000099326	MZF1	MZF1_02	230	0.393331	1.1117	0.095	0.564445	121
HGSOC	chromMAGMA	ENSG00000100726	TELO2	TEL2_Q6	229	0.330586	1.19224	0.058	0.295883	161
NMOC	chromMAGMA	ENSG00000133110	POSTN	OSF2_Q6	240	0.320226	1.15442	0.095	0.289232	244
MOC	MAGMA	ENSG00000164093	PITX2	PITX2_Q2	248	0.394711	1.0994	0.095	0.653064	127
HGSOC	MAGMA	ENSG00000138378	STAT4	STAT4_01	253	0.423685	1.11911	0.081	0.418402	161
LGSOC	MAGMA	ENSG00000072310	SREBP1	SREBP1_02	84	0.44587	1.17725	0.095	0.697731	31
EnOC	MAGMA	ENSG00000122034	AP2	AP2_Q6	253	0.389956	1.10374	0.096	0.59402	128
NMOC	MAGMA	NA	NA	CAGNWMCNNNGAC_UNKNOWN	84	0.474392	1.18285	0.096	0.364942	61
MOC	chromMAGMA	NA	NA	SNACANNNYSYAGA_UNKNOWN	85	0.333829	1.23733	0.096	0.209291	113
EnOC	chromMAGMA	ENSG00000186951	PPARA	PPARA_02	123	0.30967	1.18726	0.096	0.260981	177
MOC	chromMAGMA	ENSG00000076356	OCT	OCT_C	217	0.293064	1.15153	0.096	0.288243	245
CCOC	chromMAGMA	ENSG00000171634	FAC1	FAC1_01	196	0.290288	1.1595	0.096	0.299613	217
NMOC	chromMAGMA	ENSG00000231924	SP1	SP1_Q6	245	0.319458	1.15143	0.096	0.289872	252
CCOC	chromMAGMA	ENSG00000196712	NF1	NF1_Q6	242	0.284224	1.14661	0.096	0.316481	239
LGSOC	chromMAGMA	ENSG00000076356	OCT	OCT_C	217	0.29365	1.15595	0.096	0.326323	205
HGSOC	MAGMA	ENSG00000137273	FREAC2	FREAC2_01	246	0.425147	1.11911	0.093	0.421	161
HGSOC	MAGMA	NA	NA	YATGNWAAT_OCT_C	338	0.421347	1.11719	0.05	0.428217	162
CCOC	chromMAGMA	NA	NA	CCGNMNNTNACG_UNKNOWN	76	0.330875	1.24064	0.097	0.173348	133
NMOC	chromMAGMA	NA	NA	GCGSCMNTTT_UNKNOWN	68	0.377207	1.26165	0.097	0.182506	101
EnOC	MAGMA	ENSG00000135100	HNF1	HNF1_C	239	0.392557	1.10628	0.097	0.598714	122
NMOC	chromMAGMA	ENSG00000168610	STAT3	STAT3_02	138	0.343377	1.18505	0.097	0.255804	191
MOC	chromMAGMA	NA	NA	YKACATTT_UNKNOWN	260	0.287206	1.13596	0.097	0.311436	271
NMOC	chromMAGMA	NA	NA	SMAD_Q6	240	0.318491	1.14935	0.097	0.292378	256
EnOC	chromMAGMA	NA	NA	CEBPDELTA_Q6	217	0.284501	1.14985	0.097	0.325833	224
LGSOC	chromMAGMA	NA	NA	GCTNWTTGK_UNKNOWN	291	0.28553	1.13989	0.097	0.345425	234
MOC	MAGMA	NA	NA	GATA_C	253	0.396173	1.10613	0.097	0.647847	115
HGSOC	chromMAGMA	ENSG00000196628	TCF4	TCF4_Q5	211	0.332345	1.19104	0.068	0.298176	162
HGSOC	MAGMA	ENSG00000185630	PBX1	PBX1_01	249	0.423559	1.11712	0.104	0.426131	163
CCOC	MAGMA	ENSG00000165417	GTF2A1	TFIIA_Q6	246	0.388346	1.1069	0.098	0.547749	135
CCOC	MAGMA	NA	NA	CTAWWWATA_RSRFC4_Q2	344	0.382777	1.09519	0.098	0.559675	159
LGSOC	MAGMA	ENSG00000118513	MYB	MYB_Q3	240	0.405652	1.10809	0.098	0.857802	84
NMOC	chromMAGMA	ENSG00000150907	FOXO1	FOXO1_01	224	0.324659	1.16244	0.098	0.279134	230
NMOC	chromMAGMA	ENSG00000106331	PAX4	PAX4_02	208	0.323983	1.15813	0.098	0.287584	235
HGSOC	chromMAGMA	NA	NA	CRGAARNNNNCGA_UNKNOWN	46	0.369404	1.18986	0.199	0.300337	163
EnOC	MAGMA	ENSG00000132170	PPARG	PPARG_01	45	0.470652	1.22395	0.098	0.516495	17
HGSOC	chromMAGMA	ENSG00000076356	OCT	OCT_Q6	227	0.330348	1.18968	0.058	0.299286	164
HGSOC	MAGMA	ENSG00000214022	AP4	AP4_Q6_01	240	0.424613	1.11587	0.086	0.431404	164
HGSOC	chromMAGMA	ENSG00000177426	TGIF	TGIF_01	228	0.329048	1.18963	0.065	0.297576	165
LGSOC	MAGMA	NA	NA	MYOGNF1_01	46	0.481545	1.22255	0.098	1	9
CCOC	MAGMA	NA	NA	AHRARNT_02	15	0.57153	1.30953	0.0986775	0.773167	3
CCOC	MAGMA	ENSG00000101412	E2F1	E2F1_Q3_01	239	0.390809	1.10876	0.099	0.551682	130
LGSOC	chromMAGMA	NA	NA	YGACNNYACAR_UNKNOWN	83	0.330238	1.22421	0.099	0.237074	119
CCOC	MAGMA	ENSG00000214022	AP4	AP4_Q5	250	0.386961	1.09806	0.099	0.563526	151
EnOC	chromMAGMA	ENSG00000122877	EGR2	EGR2_01	184	0.290325	1.1637	0.099	0.298304	207
EnOC	MAGMA	ENSG00000143190	POU2F1	OCT1_07	156	0.408216	1.13143	0.099	0.504562	94
LGSOC	chromMAGMA	NA	NA	PTF1BETA_Q6	221	0.295821	1.16088	0.099	0.320178	197
EnOC	chromMAGMA	ENSG00000177606	AP1	AP1_Q2	247	0.28244	1.14465	0.099	0.335373	231
LGSOC	chromMAGMA	ENSG00000072310	SREBP1	SREBP1_Q6	235	0.290071	1.14939	0.099	0.341314	212
EnOC	chromMAGMA	ENSG00000185122	HSF1	HSF1_01	247	0.282148	1.14125	0.099	0.338567	238
EnOC	MAGMA	ENSG00000136352	TITF1	TITF1_Q3	233	0.390592	1.10435	0.099	0.602675	125
LGSOC	MAGMA	NA	NA	CEBPGAMMA_Q6	242	0.402756	1.10067	0.099	0.875592	93
HGSOC	MAGMA	NA	NA	AHRARNT_01	138	0.434186	1.11583	0.134	0.429034	165
NMOC	chromMAGMA	NA	NA	ATCMNTCCGY_UNKNOWN	50	0.392806	1.27284	0.0990991	0.177922	90
EnOC	chromMAGMA	NA	NA	HTF_01	66	0.341982	1.24741	0.1	0.196098	107
NMOC	MAGMA	ENSG00000071564	E47	E47_01	246	0.421369	1.10152	0.1	0.542192	155
CCOC	chromMAGMA	NA	NA	NFKAPPAB65_01	229	0.285133	1.15114	0.1	0.307963	233
EnOC	chromMAGMA	ENSG00000214022	AP4	AP4_Q6_01	229	0.287734	1.15765	0.1	0.308966	215
LGSOC	chromMAGMA	ENSG00000245848	CEBP	CEBP_Q2	211	0.295071	1.1593	0.1	0.324751	198
EnOC	chromMAGMA	ENSG00000185507	IRF7	IRF7_01	233	0.283128	1.14783	0.1	0.330671	226
EnOC	chromMAGMA	ENSG00000166888	STAT6	STAT6_02	238	0.283186	1.14811	0.1	0.331127	225
EnOC	chromMAGMA	NA	NA	MYCMAX_B	255	0.282755	1.14444	0.1	0.3347	232
EnOC	chromMAGMA	NA	NA	LMO2COM_01	240	0.28338	1.14334	0.1	0.336093	234
HGSOC	MAGMA	ENSG00000186130	ZID	ZID_01	252	0.423631	1.11546	0.098	0.429064	166
MOC	MAGMA	NA	NA	E2F_03	235	0.396194	1.10535	0.1	0.64492	117
HGSOC	chromMAGMA	NA	NA	TAXCREB_01	129	0.340035	1.18889	0.11	0.298543	166
EnOC	MAGMA	ENSG00000177606	AP1	AP1_01	252	0.389124	1.10339	0.101	0.592749	129
HGSOC	chromMAGMA	ENSG00000128272	ATF4	ATF4_Q2	236	0.327184	1.18881	0.07	0.297031	167
MOC	MAGMA	ENSG00000135100	HNF1	HNF1_Q6	244	0.397278	1.1046	0.101	0.647168	118
MOC	chromMAGMA	NA	NA	CCANNAGRKGGC_UNKNOWN	111	0.316525	1.18908	0.101	0.244337	182
HGSOC	MAGMA	ENSG00000172216	CEBPB	CEBPB_02	256	0.422672	1.11536	0.078	0.427129	167
MOC	chromMAGMA	ENSG00000143190	POU2F1	OCT1_Q5_01	232	0.293353	1.15213	0.101	0.289864	242
CCOC	chromMAGMA	NA	NA	MYCMAX_01	243	0.283029	1.14795	0.101	0.312762	238
EnOC	MAGMA	ENSG00000132005	RFX1	RFX1_02	264	0.388703	1.09593	0.101	0.59926	144
LGSOC	chromMAGMA	ENSG00000102145	GATA1	GATA1_05	262	0.287276	1.13761	0.101	0.349648	237
MOC	MAGMA	ENSG00000168066	SF1	SF1_Q6	243	0.395486	1.10457	0.101	0.642108	119
CCOC	chromMAGMA	NA	NA	TGCTGAY_UNKNOWN	478	0.264771	1.10527	0.101	0.418736	284
LGSOC	MAGMA	NA	NA	ERR1_Q2	252	0.398257	1.09198	0.101	0.846692	110
MOC	MAGMA	NA	NA	RYTAAWNNNTGAY_UNKNOWN	60	0.454377	1.19042	0.101	0.520892	33
CCOC	MAGMA	ENSG00000085276	MECOM	EVI1_05	169	0.40236	1.12755	0.102	0.513975	102
MOC	chromMAGMA	ENSG00000112658	SRF	SRF_01	46	0.366361	1.26661	0.102	0.179753	89
EnOC	chromMAGMA	NA	NA	TAANNYSGCG_UNKNOWN	76	0.332741	1.24327	0.102	0.195011	114
LGSOC	chromMAGMA	NA	NA	GAANYNYGACNY_UNKNOWN	65	0.346352	1.23985	0.102	0.218198	105
NMOC	MAGMA	ENSG00000105516	DBP	DBP_Q6	248	0.423903	1.10695	0.102	0.529643	146
NMOC	MAGMA	ENSG00000184481	FOXO4	FOXO4_02	252	0.424763	1.10566	0.102	0.536375	147
NMOC	chromMAGMA	ENSG00000168310	IRF2	IRF2_01	118	0.346877	1.19902	0.102	0.243941	169
NMOC	MAGMA	NA	NA	RGAGGAARY_PU1_Q6	488	0.40641	1.07893	0.102	0.543363	214
HGSOC	MAGMA	NA	NA	SNACANNNYSYAGA_UNKNOWN	86	0.438829	1.11536	0.197	0.424602	167
EnOC	MAGMA	ENSG00000231924	SP1	SP1_Q4_01	247	0.388268	1.1006	0.102	0.597316	134
MOC	MAGMA	NA	NA	COUP_01	251	0.391324	1.09759	0.102	0.656297	130
LGSOC	MAGMA	NA	NA	HNF4ALPHA_Q6	255	0.401203	1.10301	0.102	0.861862	91
CCOC	chromMAGMA	ENSG00000132170	PPARG	PPARG_01	44	0.363048	1.29083	0.102307	0.13539	87
NMOC	MAGMA	NA	NA	YAATNANRNNNCAG_UNKNOWN	64	0.478887	1.18694	0.103	0.358763	58
CCOC	MAGMA	NA	NA	NFY_Q6_01	245	0.3887	1.10183	0.103	0.56022	143
EnOC	chromMAGMA	ENSG00000168310	IRF2	IRF2_01	118	0.305597	1.19083	0.103	0.2583	171
MOC	chromMAGMA	ENSG00000115415	STAT1	STAT1_03	232	0.291107	1.14793	0.103	0.291248	253
MOC	chromMAGMA	NA	NA	NFKB_Q6_01	224	0.292417	1.15222	0.103	0.291934	240
NMOC	chromMAGMA	ENSG00000112658	SRF	SRF_Q6	225	0.321976	1.15765	0.103	0.2844	239
EnOC	chromMAGMA	ENSG00000112658	SRF	SRF_C	199	0.28929	1.15876	0.103	0.307635	213
CCOC	chromMAGMA	ENSG00000132005	RFX1	RFX1_01	234	0.28509	1.15408	0.103	0.309447	224
MOC	chromMAGMA	NA	NA	GATAAGR_GATA_C	283	0.285126	1.13446	0.103	0.313519	274
EnOC	chromMAGMA	ENSG00000111012	VDR	VDR_Q6	243	0.28418	1.15219	0.103	0.31952	222
NMOC	chromMAGMA	ENSG00000111012	VDR	VDR_Q3	214	0.318987	1.14729	0.103	0.292326	262
LGSOC	chromMAGMA	ENSG00000115415	STAT1	STAT1_03	232	0.29392	1.15787	0.103	0.321972	203
EnOC	chromMAGMA	ENSG00000118260	CREB	CREB_Q2	252	0.281059	1.13965	0.103	0.336323	244
HGSOC	chromMAGMA	NA	NA	CCANNAGRKGGC_UNKNOWN	111	0.33978	1.18789	0.123	0.298807	168
CCOC	MAGMA	ENSG00000137309	HMGIY	HMGIY_Q6	241	0.389541	1.10826	0.104	0.551853	131
CCOC	MAGMA	ENSG00000118260	CREB	CREB_Q4_01	206	0.394744	1.1142	0.104	0.560114	117
HGSOC	MAGMA	NA	NA	CCCNNNNNNAAGWT_UNKNOWN	100	0.43741	1.11516	0.187	0.423363	168
MOC	chromMAGMA	ENSG00000136997	MYC	MYC_Q2	179	0.303743	1.17645	0.104	0.262533	199
EnOC	MAGMA	ENSG00000167034	NKX3A	NKX3A_01	222	0.393889	1.11165	0.104	0.556983	120
LGSOC	MAGMA	ENSG00000141510	P53	P53_02	237	0.405115	1.10643	0.104	0.87135	85
HGSOC	chromMAGMA	NA	NA	YATGNWAAT_OCT_C	315	0.324838	1.18756	0.042	0.298104	169
HGSOC	MAGMA	ENSG00000141510	P53	P53_DECAMER_Q2	241	0.423022	1.11353	0.091	0.430819	169
EnOC	chromMAGMA	NA	NA	TTCYNRGAA_STAT5B_01	310	0.276449	1.13501	0.104	0.348461	248
HGSOC	chromMAGMA	ENSG00000169083	AR	AR_Q6	234	0.331052	1.18606	0.066	0.301742	170
HGSOC	MAGMA	ENSG00000166888	STAT6	STAT6_02	248	0.422087	1.11173	0.105	0.440014	170
LGSOC	MAGMA	ENSG00000109101	WHN	WHN_B	251	0.403524	1.10464	0.104	0.867741	88
MOC	MAGMA	ENSG00000074219	ETF	ETF_Q6	112	0.426024	1.14896	0.105	0.523638	69
EnOC	chromMAGMA	NA	NA	E2F_01	61	0.340252	1.23885	0.105	0.199594	118
NMOC	MAGMA	ENSG00000125347	IRF1	IRF1_01	240	0.426438	1.11202	0.105	0.522017	137
CCOC	MAGMA	ENSG00000169083	AR	AR_Q6	243	0.387399	1.09791	0.105	0.557507	153
MOC	chromMAGMA	NA	NA	RYAAAKNNNNNNTTGW_UNKNOWN	80	0.329081	1.20555	0.105	0.243867	147
HGSOC	chromMAGMA	NA	NA	SMTTTTGT_UNKNOWN	369	0.322083	1.18527	0.031	0.302546	171
NMOC	MAGMA	NA	NA	TTCYRGAA_UNKNOWN	322	0.417709	1.09807	0.105	0.532628	166
NMOC	chromMAGMA	ENSG00000100219	XBP1	XBP1_01	124	0.340986	1.18487	0.105	0.253682	193
NMOC	chromMAGMA	NA	NA	MEIS1BHOXA9_01	129	0.338306	1.1832	0.105	0.256616	195
LGSOC	chromMAGMA	ENSG00000100219	XBP1	XBP1_01	124	0.312572	1.18374	0.105	0.288301	165
HGSOC	MAGMA	NA	NA	RYAAAKNNNNNNTTGW_UNKNOWN	81	0.441544	1.11076	0.219	0.443743	171
HGSOC	chromMAGMA	ENSG00000102145	GATA1	GATA1_02	226	0.327815	1.18456	0.066	0.303114	172
EnOC	chromMAGMA	ENSG00000112658	SRF	SRF_01	46	0.360842	1.27292	0.106	0.169595	87
CCOC	MAGMA	ENSG00000231924	SP1	SP1_Q6	249	0.388126	1.10036	0.106	0.562006	146
MOC	chromMAGMA	ENSG00000138795	LEF1	LEF1_Q2	203	0.293601	1.15934	0.106	0.286274	225
NMOC	chromMAGMA	ENSG00000118513	MYB	MYB_Q5_01	247	0.319247	1.15155	0.106	0.290692	251
MOC	chromMAGMA	ENSG00000177606	AP1	AP1_Q6_01	252	0.287679	1.13688	0.106	0.310566	269
NMOC	chromMAGMA	NA	NA	NERF_Q2	234	0.317584	1.15003	0.106	0.293571	253
NMOC	chromMAGMA	NA	NA	AMEF2_Q6	233	0.318796	1.14319	0.106	0.30375	264
EnOC	chromMAGMA	ENSG00000169083	AR	AR_Q6	234	0.282094	1.14317	0.106	0.335297	235
LGSOC	chromMAGMA	NA	NA	NFY_Q6_01	241	0.286885	1.12905	0.106	0.364649	250
MOC	MAGMA	ENSG00000112658	SRF	SRF_C	206	0.401654	1.11395	0.106	0.664877	99
EnOC	MAGMA	NA	NA	HNF4ALPHA_Q6	255	0.388005	1.09857	0.106	0.603225	137
LGSOC	MAGMA	NA	NA	MEIS1BHOXA9_01	140	0.423009	1.13577	0.106	0.818888	55
EnOC	MAGMA	NA	NA	TCF1P_Q6	256	0.390518	1.10077	0.106	0.600062	133
EnOC	MAGMA	NA	NA	WTTGKCTG_UNKNOWN	491	0.37508	1.07597	0.106	0.606309	193
EnOC	MAGMA	NA	NA	YYCATTCAWW_UNKNOWN	185	0.400034	1.12011	0.106	0.549834	105
EnOC	MAGMA	ENSG00000118922	AP2REP	AP2REP_01	174	0.400715	1.11697	0.107	0.540231	113
HGSOC	MAGMA	ENSG00000106331	PAX4	PAX4_04	209	0.423075	1.10985	0.121	0.447114	172
MOC	chromMAGMA	NA	NA	CREL_01	243	0.289617	1.14779	0.107	0.28952	255
EnOC	chromMAGMA	ENSG00000076356	OCT	OCT_Q6	227	0.286915	1.16328	0.107	0.298327	208
NMOC	chromMAGMA	NA	NA	E2F_Q6_01	219	0.319833	1.1499	0.107	0.292805	254
NMOC	chromMAGMA	ENSG00000186951	PPAR	PPAR_DR1_Q2	241	0.319447	1.1493	0.107	0.291392	257
LGSOC	chromMAGMA	ENSG00000101412	E2F1	E2F1_Q3	228	0.292577	1.15858	0.107	0.325955	199
LGSOC	chromMAGMA	ENSG00000148516	AREB6	AREB6_03	244	0.289297	1.1434	0.107	0.339095	229
MOC	MAGMA	NA	NA	SGCGSSAAA_E2F1DP2_01	157	0.411888	1.13249	0.107	0.581897	83
NMOC	chromMAGMA	ENSG00000115415	STAT1	STAT1_01	64	0.372054	1.24257	0.107107	0.202635	117
HGSOC	chromMAGMA	ENSG00000198081	ZF5	ZF5_B	225	0.328202	1.18384	0.064	0.30419	173
CCOC	MAGMA	NA	NA	CCCNNGGGAR_OLF1_01	315	0.381784	1.09056	0.108	0.565556	169
EnOC	chromMAGMA	NA	NA	CDPCR1_01	115	0.308199	1.19656	0.108	0.254767	161
HGSOC	MAGMA	NA	NA	CTGRYYYNATT_UNKNOWN	68	0.444779	1.109	0.23	0.45028	173
LGSOC	MAGMA	ENSG00000154727	NRF2	NRF2_01	264	0.399727	1.09883	0.108	0.854892	98
MOC	chromMAGMA	ENSG00000169856	HNF6	HNF6_Q6	209	0.29376	1.15288	0.108	0.291962	238
CCOC	chromMAGMA	ENSG00000118260	CREB	CREB_Q2_01	212	0.288116	1.15873	0.108	0.298192	220
NMOC	chromMAGMA	ENSG00000071564	E47	E47_02	227	0.317344	1.14976	0.108	0.29219	255
NMOC	chromMAGMA	ENSG00000091831	ESR1	ER_Q6_01	252	0.316327	1.13576	0.108	0.310849	280
[truncated: 4,866 more rows]
