# Supplementary material for: chromMAGMA: regulatory element-centric interrogation of risk variants
Source: Life Sci Alliance. 2022 Jul 1;5(10):e202201446. doi: 10.26508/lsa.202201446 (PMC9251535; doi:10.26508/lsa.202201446)
Supplement: Supplementary file 9 [file LSA-2022-01446_TableS9.xlsx]

## Sheet: ST9
MsigdB_NAME	TF	GWAS
ATF4_Q2	ATF4	EnOC
ATF4_Q2	ATF4	MOC
CEBPB_01	CEBPB	MOC
EGR1_01	EGR1	CCOC
HIF1_Q3	HIF1A	EnOC
HIF1_Q5	HIF1A	EnOC
IRF1_01	IRF1	MOC
IRF2_01	IRF2	HGSOC
MAX_01	MAX	HGSOC
EVI1_06	MECOM	EnOC
EVI1_05	MECOM	HGSOC
EVI1_04	MECOM	NMOC
EVI1_03	MECOM	NMOC
EVI1_05	MECOM	NMOC
MEIS1_01	MEIS1	EnOC
MZF1_02	MZF1	MOC
MZF1_01	MZF1	NMOC
PAX8_B	PAX8	HGSOC
PAX8_01	PAX8	HGSOC
PAX8_B	PAX8	NMOC
RFX1_01	RFX1	NMOC
RREB1_01	RREB1	CCOC
RREB1_01	RREB1	EnOC
RREB1_01	RREB1	HGSOC
RREB1_01	RREB1	NMOC
SP1_Q2_01	SP1	CCOC
SP1_Q6	SP1	CCOC
SP1_Q4_01	SP1	CCOC
SP1_Q6_01	SP1	CCOC
SP1_01	SP1	CCOC
SP1_01	SP1	EnOC
SP1_Q6_01	SP1	EnOC
SP1_Q4_01	SP1	EnOC
SP1_Q6	SP1	EnOC
SP1_Q2_01	SP1	EnOC
SP1_01	SP1	HGSOC
SP1_Q2_01	SP1	HGSOC
SP1_01	SP1	MOC
SP1_Q6_01	SP1	MOC
SP1_Q2_01	SP1	MOC
SP1_Q6	SP1	MOC
SP1_Q2_01	SP1	NMOC
SP1_Q6_01	SP1	NMOC
SP1_01	SP1	NMOC
SRF_C	SRF	NMOC
SRF_Q5_01	SRF	NMOC
SRF_Q4	SRF	NMOC
VDR_Q3	VDR	EnOC
VDR_Q6	VDR	NMOC
Table S9. List of TFs on the “Nexus” of epithelial ovarian cancer risk. Each histotype and corresponding TFs are listed.
